# Supplementary material for: Assessing Self-Efficacy for Self-Regulation of Academic Writing
Source: Atypon-hosted journal article supplement (doi:10.1027/1015-5759/a000452), 2018-03-29
Supplement: 1015-5759_a000452_esm2.pdf [file 1015-5759_a000452_esm2.pdf]

```

FACTOR
/VARIABLES SWSRS_prä_aa_1 SWSRS_prä_aa_2 SWSRS_prä_aa_3 SWSRS_prä_aa_4 SWSRS_prä_aa_5
SWSRS_prä_aa_6 SWSRS_prä_sm_1 R_SWSRS_prä_sm_2 SWSRS_prä_sm_3 SWSRS_prä_sm_4 SWSRS_prä_sm_5
SWSRS_prä_sm_6 SWSRS_prä_sm_7 SWSRS_prä_sm_8 SWSRS_prä_sm_9 SWSRS_prä_sm_10 SWSRS_prä_sm_11
SWSRS_prä_sm_12 SWSRS_akt_sk_1 SWSRS_akt_sk_2 SWSRS_akt_sk_3 SWSRS_akt_sk_4 SWSRS_akt_sk_5
SWSRS_akt_sk_6 SWSRS_akt_sk_7 SWSRS_akt_sk_8 SWSRS_akt_sk_9 SWSRS_akt_sk_10 SWSRS_akt_sk_11
SWSRS_akt_sk_12 SWSRS_akt_sk_13 SWSRS_akt_sk_14 SWSRS_akt_sk_15 SWSRS_akt_sk_16 SWSRS_akt_sk_17
SWSRS_akt_sk_18 SWSRS_akt_sk_19 SWSRS_akt_sk_20 SWSRS_akt_sk_21 SWSRS_akt_sk_22 SWSRS_akt_sk_23
SWSRS_akt_sk_24 SWSRS_akt_sk_25 SWSRS_akt_sk_26 SWSRS_akt_sk_27 SWSRS_akt_sk_28 SWSRS_akt_sb_1
SWSRS_akt_sb_2 SWSRS_akt_sb_3 SWSRS_akt_sb_4 SWSRS_akt_sb_5 SWSRS_akt_sb_6 SWSRS_akt_sb_7
SWSRS_akt_sb_8 SWSRS_akt_sb_9 SWSRS_akt_sb_10 SWSRS_post_sb_1 SWSRS_post_sb_2 SWSRS_post_sb_3
SWSRS_post_sb_4 SWSRS_post_sb_5 SWSRS_post_sb_6 SWSRS_post_sb_7 SWSRS_post_sr_1 SWSRS_post_sr_2
SWSRS_post_sr_3 SWSRS_post_sr_4 SWSRS_post_sr_5 SWSRS_post_sr_6 SWSRS_post_sr_7
/MISSING LISTWISE
/ANALYSIS SWSRS_prä_aa_1 SWSRS_prä_aa_2 SWSRS_prä_aa_3 SWSRS_prä_aa_4 SWSRS_prä_aa_5
SWSRS_prä_aa_6 SWSRS_prä_sm_1 R_SWSRS_prä_sm_2 SWSRS_prä_sm_3 SWSRS_prä_sm_4 SWSRS_prä_sm_5
SWSRS_prä_sm_6 SWSRS_prä_sm_7 SWSRS_prä_sm_8 SWSRS_prä_sm_9 SWSRS_prä_sm_10 SWSRS_prä_sm_11
SWSRS_prä_sm_12 SWSRS_akt_sk_1 SWSRS_akt_sk_2 SWSRS_akt_sk_3 SWSRS_akt_sk_4 SWSRS_akt_sk_5
SWSRS_akt_sk_6 SWSRS_akt_sk_7 SWSRS_akt_sk_8 SWSRS_akt_sk_9 SWSRS_akt_sk_10 SWSRS_akt_sk_11
SWSRS_akt_sk_12 SWSRS_akt_sk_13 SWSRS_akt_sk_14 SWSRS_akt_sk_15 SWSRS_akt_sk_16 SWSRS_akt_sk_17
SWSRS_akt_sk_18 SWSRS_akt_sk_19 SWSRS_akt_sk_20 SWSRS_akt_sk_21 SWSRS_akt_sk_22 SWSRS_akt_sk_23
SWSRS_akt_sk_24 SWSRS_akt_sk_25 SWSRS_akt_sk_26 SWSRS_akt_sk_27 SWSRS_akt_sk_28 SWSRS_akt_sb_1
SWSRS_akt_sb_2 SWSRS_akt_sb_3 SWSRS_akt_sb_4 SWSRS_akt_sb_5 SWSRS_akt_sb_6 SWSRS_akt_sb_7
SWSRS_akt_sb_8 SWSRS_akt_sb_9 SWSRS_akt_sb_10 SWSRS_post_sb_1 SWSRS_post_sb_2 SWSRS_post_sb_3
SWSRS_post_sb_4 SWSRS_post_sb_5 SWSRS_post_sb_6 SWSRS_post_sb_7 SWSRS_post_sr_1 SWSRS_post_sr_2
SWSRS_post_sr_3 SWSRS_post_sr_4 SWSRS_post_sr_5 SWSRS_post_sr_6 SWSRS_post_sr_7
/PRINT UNIVARIATE INITIAL CORRELATION KMO REPR AIC EXTRACTION ROTATION
/PLOT EIGEN
/CRITERIA MINEIGEN(1) ITERATE(100)
/EXTRACTION PAF
/CRITERIA ITERATE(100)
/ROTATION PROMAX(4)
/METHOD=CORRELATION.

```

## Faktorenanalyse

Deskriptive Statistiken

|                                                                                                                                                                                                                                        | Mittelwert | Standardabweichung | Analyse N |
|----------------------------------------------------------------------------------------------------------------------------------------------------------------------------------------------------------------------------------------|------------|--------------------|-----------|
| <input type="checkbox"/> Ich kann die Anforderungen unterschiedlicher Textsorten (wie z. B. Hausarbeit, Protokoll, Critical Paper, usw.) verstehen.] Um Ihnen die Beantwortung zu erleichtern, können Sie die Antwort in Prozent geben | 8,28       | 2,521              | 121       |
| <input type="checkbox"/> Ich kann mir konkrete Schreibziele setzen. ] Um Ihnen die Beantwortung zu erleichtern, können Sie die Antwort in Prozent geben                                                                                | 7,05       | 2,866              | 121       |
| <input type="checkbox"/> Ich kann mein Schreibprojekt in kleinere Schreibziele unterteilen. ] Um Ihnen die Beantwortung zu erleichtern, können Sie die Antwort in Prozent geben                                                        | 7,17       | 2,750              | 121       |
| <input type="checkbox"/> Ich kann meine Ideen für meinen Text vor dem Schreiben strukturieren. ] Um Ihnen die Beantwortung zu erleichtern, können Sie die Antwort in Prozent geben                                                     | 7,35       | 2,915              | 121       |
| <input type="checkbox"/> Ich kann mir das Schreiben in sinnvolle Arbeitsschritte unterteilen. ] Um Ihnen die Beantwortung zu erleichtern, können Sie die Antwort in Prozent geben                                                      | 7,36       | 2,559              | 121       |
| <input type="checkbox"/> Ich kann meine Ideen auch bei einem komplexen Thema gut organisieren. ] Um Ihnen die Beantwortung zu erleichtern, können Sie die Antwort in Prozent geben                                                     | 7,17       | 2,502              | 121       |
| <input type="checkbox"/> Ich kann mich dazu motivieren mit dem Schreiben anzufangen. ] Um Ihnen die Beantwortung zu erleichtern, können Sie die Antwort in Prozent geben                                                               | 6,17       | 3,057              | 121       |

Deskriptive Statistiken

|                                                                                                                                                                                                     | Mittelwert | Standardabweichung | Analyse N |
|-----------------------------------------------------------------------------------------------------------------------------------------------------------------------------------------------------|------------|--------------------|-----------|
| [ Ich kann mich erst auf den letzten Drücker zum Schreiben motivieren. ] Um Ihnen die Beantwortung zu erleichtern, können Sie die Antwort in Prozent geben                                          | 4,87       | 3,478              | 121       |
| [ Ich kann Probleme, die beim Schreiben auftauchen, überwinden. ] Um Ihnen die Beantwortung zu erleichtern, können Sie die Antwort in Prozent geben                                                 | 7,73       | 2,244              | 121       |
| [ Ich kann mich durch das Vorstellen negativer Konsequenzen des Nichtschreibens zum Weiterschreiben motivieren. ] Um Ihnen die Beantwortung zu erleichtern, können Sie die Antwort in Prozent geben | 6,79       | 3,314              | 121       |
| [ Ich kann mich durch das Vorstellen positiver Konsequenzen zum Weiterschreiben motivieren. ] Um Ihnen die Beantwortung zu erleichtern, können Sie die Antwort in Prozent geben                     | 6,95       | 3,087              | 121       |
| [ Ich kann Freude am Schreiben entwickeln. ] Um Ihnen die Beantwortung zu erleichtern, können Sie die Antwort in Prozent geben                                                                      | 7,44       | 2,884              | 121       |
| [ Ich kann Interesse für das Schreiben entwickeln. ] Um Ihnen die Beantwortung zu erleichtern, können Sie die Antwort in Prozent geben                                                              | 7,64       | 2,787              | 121       |
| [ Ich kann leicht Wege finden mein Interesse am Schreiben zu steigern. ] Um Ihnen die Beantwortung zu erleichtern, können Sie die Antwort in Prozent geben                                          | 5,87       | 2,735              | 121       |

Deskriptive Statistiken

|                                                                                                                                                                                                   | Mittelwert | Standardabweichung | Analyse N |
|---------------------------------------------------------------------------------------------------------------------------------------------------------------------------------------------------|------------|--------------------|-----------|
| [ Ich kann mir beim Schreiben vornehmen, gute Noten durch meine schriftlichen Arbeiten zu erzielen. ] Um Ihnen die Beantwortung zu erleichtern, können Sie die Antwort in Prozent geben           | 8,08       | 2,777              | 121       |
| [ Ich kann mir beim Schreiben vornehmen, durch meine schriftlichen Arbeiten zu zeigen, wie gut ich bin.] Um Ihnen die Beantwortung zu erleichtern, können Sie die Antwort in Prozent geben        | 7,59       | 2,949              | 121       |
| [ Ich kann mir vornehmen, durch das Schreiben mein Wissen zu erweitern. ] Um Ihnen die Beantwortung zu erleichtern, können Sie die Antwort in Prozent geben                                       | 7,30       | 3,135              | 121       |
| [ Ich kann mir vornehmen, durch das Schreiben zu neuen Erkenntnissen zu gelangen. ] Um Ihnen die Beantwortung zu erleichtern, können Sie die Antwort in Prozent geben                             | 6,79       | 2,813              | 121       |
| [ Ich kann mein Vorgehen beim Schreiben überwachen. ] Um Ihnen die Beantwortung zu erleichtern, können Sie die Antwort in Prozent geben                                                           | 6,28       | 2,829              | 121       |
| [ Ich kann mich beim Schreiben durch lautes Vorlesen von Textstellen unterstützen. ] Um Ihnen die Beantwortung zu erleichtern, können Sie die Antwort in Prozent geben                            | 6,07       | 3,312              | 121       |
| [ Ich kann mich beim Schreiben durch innerliches Vorlesen von bereits geschriebenen Textstellen unterstützen. ] Um Ihnen die Beantwortung zu erleichtern, können Sie die Antwort in Prozent geben | 7,13       | 3,071              | 121       |

Deskriptive Statistiken

|                                                                                                                                                                                                      | Mittelwert | Standardabweichung | Analyse N |
|------------------------------------------------------------------------------------------------------------------------------------------------------------------------------------------------------|------------|--------------------|-----------|
| <input type="checkbox"/> Ich kann mir die Dinge, die ich in meinem Text beschreibe, bildlich vorstellen. ] Um Ihnen die Beantwortung zu erleichtern, können Sie die Antwort in Prozent geben         | 7,44       | 2,639              | 121       |
| <input type="checkbox"/> Ich kann zunächst einen Entwurf meines Textes anfertigen. ] Um Ihnen die Beantwortung zu erleichtern, können Sie die Antwort in Prozent geben                               | 6,44       | 3,071              | 121       |
| <input type="checkbox"/> Ich kann mir eine Gliederung erstellen, die mich beim Schreiben unterstützt. ] Um Ihnen die Beantwortung zu erleichtern, können Sie die Antwort in Prozent geben            | 8,54       | 2,589              | 121       |
| <input type="checkbox"/> Ich kann mich auf das Schreiben konzentrieren. ] Um Ihnen die Beantwortung zu erleichtern, können Sie die Antwort in Prozent geben                                          | 7,54       | 2,717              | 121       |
| <input type="checkbox"/> Ich kann Ablenkungen beim Schreiben ausblenden. ] Um Ihnen die Beantwortung zu erleichtern, können Sie die Antwort in Prozent geben                                         | 4,92       | 2,946              | 121       |
| <input type="checkbox"/> Ich kann mich auf das Schreiben konzentrieren, auch wenn um mich herum viel passiert. ] Um Ihnen die Beantwortung zu erleichtern, können Sie die Antwort in Prozent geben   | 4,71       | 2,827              | 121       |
| <input type="checkbox"/> Ich kann mich auch auf das Schreiben konzentrieren, wenn ich andere Dinge im Kopf habe. ] Um Ihnen die Beantwortung zu erleichtern, können Sie die Antwort in Prozent geben | 4,69       | 2,789              | 121       |

**Deskriptive Statistiken**

|                                                                                                                                                                                                                 | Mittelwert | Standardabweichung | Analyse N |
|-----------------------------------------------------------------------------------------------------------------------------------------------------------------------------------------------------------------|------------|--------------------|-----------|
| <input type="checkbox"/> Ich kann mich wieder auf das Schreiben konzentrieren, wenn ich kurz an etwas anderes gedacht habe. ] Um Ihnen die Beantwortung zu erleichtern, können Sie die Antwort in Prozent geben | 7,28       | 2,662              | 121       |
| <input type="checkbox"/> Ich kann mich wieder auf das Schreiben konzentrieren, wenn ich kurz ablenkt war. ] Um Ihnen die Beantwortung zu erleichtern, können Sie die Antwort in Prozent geben                   | 7,25       | 2,534              | 121       |
| <input type="checkbox"/> Ich kann mich an meine festen Schreibzeiten halten.] Um Ihnen die Beantwortung zu erleichtern, können Sie die Antwort in Prozent geben                                                 | 5,07       | 3,156              | 121       |
| <input type="checkbox"/> Ich kann mir feste Schreibzeiten einplanen. ] Um Ihnen die Beantwortung zu erleichtern, können Sie die Antwort in Prozent geben                                                        | 5,46       | 3,025              | 121       |
| <input type="checkbox"/> Ich kann meine Schreibzeit effektiv nutzen. ] Um Ihnen die Beantwortung zu erleichtern, können Sie die Antwort in Prozent geben                                                        | 6,56       | 2,834              | 121       |
| <input type="checkbox"/> Ich kann meine Texte bis zur Abgabefrist fertigstellen. ] Um Ihnen die Beantwortung zu erleichtern, können Sie die Antwort in Prozent geben                                            | 9,60       | 2,223              | 121       |
| <input type="checkbox"/> Ich kann mir meine Zeit so einteilen, dass ich konzentriert an meinem Text arbeite. ] Um Ihnen die Beantwortung zu erleichtern, können Sie die Antwort in Prozent geben                | 6,67       | 2,879              | 121       |
| <input type="checkbox"/> Ich kann, auch wenn viel zu tun ist, Zeit finden, um konzentriert an meinem Text zu arbeiten. ] Um Ihnen die Beantwortung zu erleichtern, können Sie die Antwort in Prozent geben      | 6,12       | 2,852              | 121       |

Deskriptive Statistiken

|                                                                                                                                                                                                                 | Mittelwert | Standardabweichung | Analyse N |
|-----------------------------------------------------------------------------------------------------------------------------------------------------------------------------------------------------------------|------------|--------------------|-----------|
| <input type="checkbox"/> Ich kann mir meinen Schreibplatz so gestalten, dass ich ungestört schreiben kann. ] Um Ihnen die Beantwortung zu erleichtern, können Sie die Antwort in Prozent geben                  | 7,31       | 3,019              | 121       |
| <input type="checkbox"/> Ich kann mir einen geeigneten Platz zum Schreiben auswählen. ] Um Ihnen die Beantwortung zu erleichtern, können Sie die Antwort in Prozent geben                                       | 8,16       | 2,699              | 121       |
| <input type="checkbox"/> Ich kann mich durch Belohnungen zum Weiterschreiben motivieren. ] Um Ihnen die Beantwortung zu erleichtern, können Sie die Antwort in Prozent geben                                    | 6,64       | 3,143              | 121       |
| <input type="checkbox"/> Ich kann mich beim Schreiben selbst belohnen, indem ich mein Vorankommen protokolliere. ] Um Ihnen die Beantwortung zu erleichtern, können Sie die Antwort in Prozent geben            | 3,82       | 3,019              | 121       |
| <input type="checkbox"/> Ich kann mich beim Schreiben belohnen, indem ich mir bei gutem Vorankommen einen freien Tag gönne. ] Um Ihnen die Beantwortung zu erleichtern, können Sie die Antwort in Prozent geben | 5,98       | 3,429              | 121       |
| <input type="checkbox"/> Ich kann mich beim Schreiben belohnen, indem ich mir schöne Dinge für gutes Vorankommen gönne. ] Um Ihnen die Beantwortung zu erleichtern, können Sie die Antwort in Prozent geben     | 7,04       | 3,226              | 121       |
| <input type="checkbox"/> Ich kann mir gezieltes Feedback zu meinen Text einholen. ] Um Ihnen die Beantwortung zu erleichtern, können Sie die Antwort in Prozent geben                                           | 7,11       | 2,909              | 121       |

Deskriptive Statistiken

|                                                                                                                                                                                                                      | Mittelwert | Standardabweichung | Analyse N |
|----------------------------------------------------------------------------------------------------------------------------------------------------------------------------------------------------------------------|------------|--------------------|-----------|
| <input type="checkbox"/> Ich kann mir zu der Rohfassung meines Textes kritisches Feedback einholen. ] Um Ihnen die Beantwortung zu erleichtern, können Sie die Antwort in Prozent geben                              | 6,85       | 3,172              | 121       |
| <input type="checkbox"/> Ich kann das Feedback Anderer zu meinen Texten umsetzen. ] Um Ihnen die Beantwortung zu erleichtern, können Sie die Antwort in Prozent geben                                                | 8,06       | 2,678              | 121       |
| <input type="checkbox"/> Ich kann mich daran orientieren, welche Strategien KommilitonInnen beim Schreiben einsetzen. ] Um Ihnen die Beantwortung zu erleichtern, können Sie die Antwort in Prozent geben            | 4,45       | 2,736              | 121       |
| <input type="checkbox"/> Ich kann mich beim Schreiben selbst beobachten. ] Um Ihnen die Beantwortung zu erleichtern, können Sie die Antwort in Prozent geben                                                         | 5,27       | 3,101              | 121       |
| <input type="checkbox"/> Ich kann mein Vorgehen beim Schreiben ändern, wenn ich merke, dass es nicht erfolgreich ist. ] Um Ihnen die Beantwortung zu erleichtern, können Sie die Antwort in Prozent geben            | 7,12       | 2,762              | 121       |
| <input type="checkbox"/> Ich kann meinen Zeitplan für das Schreiben anpassen, wenn ich merke, dass ich ihn nicht einhalten kann. ] Um Ihnen die Beantwortung zu erleichtern, können Sie die Antwort in Prozent geben | 7,81       | 2,570              | 121       |
| <input type="checkbox"/> Ich kann mein Vorankommen beim Schreiben nachvollziehen. ] Um Ihnen die Beantwortung zu erleichtern, können Sie die Antwort in Prozent geben                                                | 7,79       | 2,474              | 121       |



Deskriptive Statistiken

|                                                                                                                                                                                                                  | Mittelwert | Standardabweichung | Analyse N |
|------------------------------------------------------------------------------------------------------------------------------------------------------------------------------------------------------------------|------------|--------------------|-----------|
| <input type="checkbox"/> Ich kann mein Vorankommen beim Schreiben durch die Anzahl der geschriebenen Stunden nachvollziehen. ] Um Ihnen die Beantwortung zu erleichtern, können Sie die Antwort in Prozent geben | 4,62       | 3,026              | 121       |
| <input type="checkbox"/> Ich kann mein Vorankommen beim Schreiben durch die Anzahl der geschriebenen Seiten nachvollziehen. ] Um Ihnen die Beantwortung zu erleichtern, können Sie die Antwort in Prozent geben  | 8,40       | 2,641              | 121       |
| <input type="checkbox"/> Ich kann ausdauernd an meinem Text arbeiten. ] Um Ihnen die Beantwortung zu erleichtern, können Sie die Antwort in Prozent geben                                                        | 7,32       | 2,905              | 121       |
| <input type="checkbox"/> Ich kann mehrere Ideen in einem Text zusammen führen. ] Um Ihnen die Beantwortung zu erleichtern, können Sie die Antwort in Prozent geben                                               | 8,46       | 2,251              | 121       |
| <input type="checkbox"/> Ich kann eine Schreibblockade lösen und danach weiterschreiben. ] Um Ihnen die Beantwortung zu erleichtern, können Sie die Antwort in Prozent geben                                     | 6,40       | 2,651              | 121       |
| <input type="checkbox"/> Ich kann mich lange Zeit auf das Schreiben konzentrieren, wenn es nötig ist. ] Um Ihnen die Beantwortung zu erleichtern, können Sie die Antwort in Prozent geben                        | 7,74       | 2,877              | 121       |
| <input type="checkbox"/> Ich kann die Qualität meines Textes realistisch einschätzen. ] Um Ihnen die Beantwortung zu erleichtern, können Sie die Antwort in Prozent geben                                        | 7,49       | 2,589              | 121       |

Deskriptive Statistiken

|                                                                                                                                                                                                       | Mittelwert | Standardabweichung | Analyse N |
|-------------------------------------------------------------------------------------------------------------------------------------------------------------------------------------------------------|------------|--------------------|-----------|
| <input type="checkbox"/> Ich kann die Anforderungen, die an meinen Text gestellt werden, erfüllen. ] Um Ihnen die Beantwortung zu erleichtern, können Sie die Antwort in Prozent geben                | 8,47       | 2,090              | 121       |
| <input type="checkbox"/> Ich kann die von mir selbst gesetzten Kriterien für die Qualität meiner Texte erreichen. ] Um Ihnen die Beantwortung zu erleichtern, können Sie die Antwort in Prozent geben | 7,84       | 2,429              | 121       |
| <input type="checkbox"/> Ich kann die von mir selbst gesetzten Teilziele beim Schreiben erreichen. ] Um Ihnen die Beantwortung zu erleichtern, können Sie die Antwort in Prozent geben                | 7,19       | 2,919              | 121       |
| <input type="checkbox"/> Ich kann von mir selbst zu hoch gesetzte Ansprüche heruntersetzen.] Um Ihnen die Beantwortung zu erleichtern, können Sie die Antwort in Prozent geben                        | 5,91       | 2,930              | 121       |
| <input type="checkbox"/> Ich kann meine Texte durch Überarbeitung besser machen. ] Um Ihnen die Beantwortung zu erleichtern, können Sie die Antwort in Prozent geben                                  | 8,55       | 2,516              | 121       |
| <input type="checkbox"/> Ich kann meine Texte durch Überarbeitung verständlicher machen. ] Um Ihnen die Beantwortung zu erleichtern, können Sie die Antwort in Prozent geben                          | 8,49       | 2,367              | 121       |
| <input type="checkbox"/> Ich kann mit der Qualität meiner Texte zufrieden sein. ] Um Ihnen die Beantwortung zu erleichtern, können Sie die Antwort in Prozent geben                                   | 8,02       | 2,559              | 121       |
| <input type="checkbox"/> Ich kann ein gutes Gefühl für das Vorankommen beim Schreiben entwickeln. ] Um Ihnen die Beantwortung zu erleichtern, können Sie die Antwort in Prozent geben                 | 7,20       | 2,747              | 121       |

Deskriptive Statistiken

|                                                                                                                                                                                                                    | Mittelwert | Standardabweichung | Analyse N |
|--------------------------------------------------------------------------------------------------------------------------------------------------------------------------------------------------------------------|------------|--------------------|-----------|
| <input type="checkbox"/> Ich kann die Zeit, die mir zum Schreiben zur Verfügung steht, gut einschätzen. <input type="checkbox"/> Um Ihnen die Beantwortung zu erleichtern, können Sie die Antwort in Prozent geben | 7,00       | 2,864              | 121       |
| <input type="checkbox"/> Ich kann vermeiden, dass ich einen Fehler beim nächsten Mal wieder mache. <input type="checkbox"/> Um Ihnen die Beantwortung zu erleichtern, können Sie die Antwort in Prozent geben      | 7,60       | 2,594              | 121       |
| <input type="checkbox"/> Ich kann aus misslungenen Schreibertahrungen lernen. <input type="checkbox"/> Um Ihnen die Beantwortung zu erleichtern, können Sie die Antwort in Prozent geben                           | 7,43       | 2,819              | 121       |
| <input type="checkbox"/> Ich kann mein Vorgehen bei Schreibprojekten durch Erfahrung verbessern. <input type="checkbox"/> Um Ihnen die Beantwortung zu erleichtern, können Sie die Antwort in Prozent geben        | 7,97       | 2,674              | 121       |
| <input type="checkbox"/> Ich kann einschätzen, was ich beim nächsten Mal anders machen muss. <input type="checkbox"/> Um Ihnen die Beantwortung zu erleichtern, können Sie die Antwort in Prozent geben            | 7,46       | 2,513              | 121       |

| 1 | 2 | 3 | 4 | 5 | 6 | 7 | 8 | 9 | 10 | 11 | 12 | 13 | 14 | 15 | 16 | 17 | 18 | 19 | 20 | 21 | 22 | 23 | 24 | 25 | 26 | 27 | 28 | 29 | 30 | 31 | 32 | 33 | 34 | 35 | 36 | 37 | 38 | 39 | 40 | 41 | 42 | 43 | 44 | 45 | 46 | 47 | 48 | 49 | 50 | 51 | 52 | 53 | 54 | 55 | 56 | 57 | 58 | 59 | 60 | 61 | 62 | 63 | 64 | 65 | 66 | 67 | 68 | 69 | 70 | 71 | 72 | 73 | 74 | 75 | 76 | 77 | 78 | 79 | 80 | 81 | 82 | 83 | 84 | 85 | 86 | 87 | 88 | 89 | 90 | 91 | 92 | 93 | 94 | 95 | 96 | 97 | 98 | 99 | 100 |
|---|---|---|---|---|---|---|---|---|----|----|----|----|----|----|----|----|----|----|----|----|----|----|----|----|----|----|----|----|----|----|----|----|----|----|----|----|----|----|----|----|----|----|----|----|----|----|----|----|----|----|----|----|----|----|----|----|----|----|----|----|----|----|----|----|----|----|----|----|----|----|----|----|----|----|----|----|----|----|----|----|----|----|----|----|----|----|----|----|----|----|----|----|----|----|----|----|----|----|-----|
| 1 | 2 | 3 | 4 | 5 | 6 | 7 | 8 | 9 | 10 | 11 | 12 | 13 | 14 | 15 | 16 | 17 | 18 | 19 | 20 | 21 | 22 | 23 | 24 | 25 | 26 | 27 | 28 | 29 | 30 | 31 | 32 | 33 | 34 | 35 | 36 | 37 | 38 | 39 | 40 | 41 | 42 | 43 | 44 | 45 | 46 | 47 | 48 | 49 | 50 | 51 | 52 | 53 | 54 | 55 | 56 | 57 | 58 | 59 | 60 | 61 | 62 | 63 | 64 | 65 | 66 | 67 | 68 | 69 | 70 | 71 | 72 | 73 | 74 | 75 | 76 | 77 | 78 | 79 | 80 | 81 | 82 | 83 | 84 | 85 | 86 | 87 | 88 | 89 | 90 | 91 | 92 | 93 | 94 | 95 | 96 | 97 | 98 | 99 | 100 |



| 1 | 2 | 3 | 4 | 5 | 6 | 7 | 8 | 9 | 10 | 11 | 12 | 13 | 14 | 15 | 16 | 17 | 18 | 19 | 20 | 21 | 22 | 23 | 24 | 25 | 26 | 27 | 28 | 29 | 30 | 31 | 32 | 33 | 34 | 35 | 36 | 37 | 38 | 39 | 40 | 41 | 42 | 43 | 44 | 45 | 46 | 47 | 48 | 49 | 50 | 51 | 52 | 53 | 54 | 55 | 56 | 57 | 58 | 59 | 60 | 61 | 62 | 63 | 64 | 65 | 66 | 67 | 68 | 69 | 70 | 71 | 72 | 73 | 74 | 75 | 76 | 77 | 78 | 79 | 80 | 81 | 82 | 83 | 84 | 85 | 86 | 87 | 88 | 89 | 90 | 91 | 92 | 93 | 94 | 95 | 96 | 97 | 98 | 99 | 100 |
|---|---|---|---|---|---|---|---|---|----|----|----|----|----|----|----|----|----|----|----|----|----|----|----|----|----|----|----|----|----|----|----|----|----|----|----|----|----|----|----|----|----|----|----|----|----|----|----|----|----|----|----|----|----|----|----|----|----|----|----|----|----|----|----|----|----|----|----|----|----|----|----|----|----|----|----|----|----|----|----|----|----|----|----|----|----|----|----|----|----|----|----|----|----|----|----|----|----|----|-----|
| 1 | 2 | 3 | 4 | 5 | 6 | 7 | 8 | 9 | 10 | 11 | 12 | 13 | 14 | 15 | 16 | 17 | 18 | 19 | 20 | 21 | 22 | 23 | 24 | 25 | 26 | 27 | 28 | 29 | 30 | 31 | 32 | 33 | 34 | 35 | 36 | 37 | 38 | 39 | 40 | 41 | 42 | 43 | 44 | 45 | 46 | 47 | 48 | 49 | 50 | 51 | 52 | 53 | 54 | 55 | 56 | 57 | 58 | 59 | 60 | 61 | 62 | 63 | 64 | 65 | 66 | 67 | 68 | 69 | 70 | 71 | 72 | 73 | 74 | 75 | 76 | 77 | 78 | 79 | 80 | 81 | 82 | 83 | 84 | 85 | 86 | 87 | 88 | 89 | 90 | 91 | 92 | 93 | 94 | 95 | 96 | 97 | 98 | 99 | 100 |



| 1 | 2 | 3 | 4 | 5 | 6 | 7 | 8 | 9 | 10 | 11 | 12 | 13 | 14 | 15 | 16 | 17 | 18 | 19 | 20 | 21 | 22 | 23 | 24 | 25 | 26 | 27 | 28 | 29 | 30 | 31 | 32 | 33 | 34 | 35 | 36 | 37 | 38 | 39 | 40 | 41 | 42 | 43 | 44 | 45 | 46 | 47 | 48 | 49 | 50 | 51 | 52 | 53 | 54 | 55 | 56 | 57 | 58 | 59 | 60 | 61 | 62 | 63 | 64 | 65 | 66 | 67 | 68 | 69 | 70 | 71 | 72 | 73 | 74 | 75 | 76 | 77 | 78 | 79 | 80 | 81 | 82 | 83 | 84 | 85 | 86 | 87 | 88 | 89 | 90 | 91 | 92 | 93 | 94 | 95 | 96 | 97 | 98 | 99 | 100 |
|---|---|---|---|---|---|---|---|---|----|----|----|----|----|----|----|----|----|----|----|----|----|----|----|----|----|----|----|----|----|----|----|----|----|----|----|----|----|----|----|----|----|----|----|----|----|----|----|----|----|----|----|----|----|----|----|----|----|----|----|----|----|----|----|----|----|----|----|----|----|----|----|----|----|----|----|----|----|----|----|----|----|----|----|----|----|----|----|----|----|----|----|----|----|----|----|----|----|----|-----|
| 1 | 2 | 3 | 4 | 5 | 6 | 7 | 8 | 9 | 10 | 11 | 12 | 13 | 14 | 15 | 16 | 17 | 18 | 19 | 20 | 21 | 22 | 23 | 24 | 25 | 26 | 27 | 28 | 29 | 30 | 31 | 32 | 33 | 34 | 35 | 36 | 37 | 38 | 39 | 40 | 41 | 42 | 43 | 44 | 45 | 46 | 47 | 48 | 49 | 50 | 51 | 52 | 53 | 54 | 55 | 56 | 57 | 58 | 59 | 60 | 61 | 62 | 63 | 64 | 65 | 66 | 67 | 68 | 69 | 70 | 71 | 72 | 73 | 74 | 75 | 76 | 77 | 78 | 79 | 80 | 81 | 82 | 83 | 84 | 85 | 86 | 87 | 88 | 89 | 90 | 91 | 92 | 93 | 94 | 95 | 96 | 97 | 98 | 99 | 100 |





**Kommunalitäten**

|                                                                                                                                                                                                     | Anfänglich | Extraktion |
|-----------------------------------------------------------------------------------------------------------------------------------------------------------------------------------------------------|------------|------------|
| [ Ich kann mir das Schreiben in sinnvolle Arbeitsschritte unterteilen. ] Um Ihnen die Beantwortung zu erleichtern, können Sie die Antwort in Prozent geben                                          | ,867       | ,807       |
| [ Ich kann meine Ideen auch bei einem komplexen Thema gut organisieren. ] Um Ihnen die Beantwortung zu erleichtern, können Sie die Antwort in Prozent geben                                         | ,832       | ,729       |
| [ Ich kann mich dazu motivieren mit dem Schreiben anzufangen. ] Um Ihnen die Beantwortung zu erleichtern, können Sie die Antwort in Prozent geben                                                   | ,804       | ,637       |
| [ Ich kann mich erst auf den letzten Drücker zum Schreiben motivieren. ] Um Ihnen die Beantwortung zu erleichtern, können Sie die Antwort in Prozent geben                                          | ,778       | ,717       |
| [ Ich kann Probleme, die beim Schreiben auftauchen, überwinden. ] Um Ihnen die Beantwortung zu erleichtern, können Sie die Antwort in Prozent geben                                                 | ,802       | ,723       |
| [ Ich kann mich durch das Vorstellen negativer Konsequenzen des Nichtschreibens zum Weiterschreiben motivieren. ] Um Ihnen die Beantwortung zu erleichtern, können Sie die Antwort in Prozent geben | ,707       | ,502       |
| [ Ich kann mich durch das Vorstellen positiver Konsequenzen zum Weiterschreiben motivieren. ] Um Ihnen die Beantwortung zu erleichtern, können Sie die Antwort in Prozent geben                     | ,833       | ,671       |

**Kommunalitäten**

|                                                                                                                                                                                            | Anfänglich | Extraktion |
|--------------------------------------------------------------------------------------------------------------------------------------------------------------------------------------------|------------|------------|
| [ Ich kann Freude am Schreiben entwickeln. ] Um Ihnen die Beantwortung zu erleichtern, können Sie die Antwort in Prozent geben                                                             | ,882       | ,850       |
| [ Ich kann Interesse für das Schreiben entwickeln. ] Um Ihnen die Beantwortung zu erleichtern, können Sie die Antwort in Prozent geben                                                     | ,863       | ,759       |
| [ Ich kann leicht Wege finden mein Interesse am Schreiben zu steigern. ] Um Ihnen die Beantwortung zu erleichtern, können Sie die Antwort in Prozent geben                                 | ,800       | ,608       |
| [ Ich kann mir beim Schreiben vornehmen, gute Noten durch meine schriftlichen Arbeiten zu erzielen. ] Um Ihnen die Beantwortung zu erleichtern, können Sie die Antwort in Prozent geben    | ,869       | ,896       |
| [ Ich kann mir beim Schreiben vornehmen, durch meine schriftlichen Arbeiten zu zeigen, wie gut ich bin.] Um Ihnen die Beantwortung zu erleichtern, können Sie die Antwort in Prozent geben | ,867       | ,790       |
| [ Ich kann mir vornehmen, durch das Schreiben mein Wissen zu erweitern. ] Um Ihnen die Beantwortung zu erleichtern, können Sie die Antwort in Prozent geben                                | ,887       | ,698       |
| [ Ich kann mir vornehmen, durch das Schreiben zu neuen Erkenntnissen zu gelangen. ] Um Ihnen die Beantwortung zu erleichtern, können Sie die Antwort in Prozent geben                      | ,845       | ,602       |
| [ Ich kann mein Vorgehen beim Schreiben überwachen. ] Um Ihnen die Beantwortung zu erleichtern, können Sie die Antwort in Prozent geben                                                    | ,829       | ,697       |

**Kommunalitäten**

|                                                                                                                                                                                                                          | Anfänglich | Extraktion |
|--------------------------------------------------------------------------------------------------------------------------------------------------------------------------------------------------------------------------|------------|------------|
| <input type="checkbox"/> Ich kann mich beim Schreiben durch lautes Vorlesen von Textstellen unterstützen. ] Um Ihnen die Beantwortung zu erleichtern, können Sie die Antwort in Prozent geben                            | ,589       | ,421       |
| <input type="checkbox"/> Ich kann mich beim Schreiben durch innerliches Vorlesen von bereits geschriebenen Textstellen unterstützen. ] Um Ihnen die Beantwortung zu erleichtern, können Sie die Antwort in Prozent geben | ,722       | ,627       |
| <input type="checkbox"/> Ich kann mir die Dinge, die ich in meinem Text beschreibe, bildlich vorstellen. ] Um Ihnen die Beantwortung zu erleichtern, können Sie die Antwort in Prozent geben                             | ,702       | ,448       |
| <input type="checkbox"/> Ich kann zunächst einen Entwurf meines Textes anfertigen. ] Um Ihnen die Beantwortung zu erleichtern, können Sie die Antwort in Prozent geben                                                   | ,722       | ,480       |
| <input type="checkbox"/> Ich kann mir eine Gliederung erstellen, die mich beim Schreiben unterstützt. ] Um Ihnen die Beantwortung zu erleichtern, können Sie die Antwort in Prozent geben                                | ,789       | ,600       |
| <input type="checkbox"/> Ich kann mich auf das Schreiben konzentrieren. ] Um Ihnen die Beantwortung zu erleichtern, können Sie die Antwort in Prozent geben                                                              | ,908       | ,809       |
| <input type="checkbox"/> Ich kann Ablenkungen beim Schreiben ausblenden. ] Um Ihnen die Beantwortung zu erleichtern, können Sie die Antwort in Prozent geben                                                             | ,831       | ,669       |

**Kommunalitäten**

|                                                                                                                                                                                                                        | Anfänglich | Extraktion |
|------------------------------------------------------------------------------------------------------------------------------------------------------------------------------------------------------------------------|------------|------------|
| <p><input type="checkbox"/> Ich kann mich auf das Schreiben konzentrieren, auch wenn um mich herum viel passiert. ] Um Ihnen die Beantwortung zu erleichtern, können Sie die Antwort in Prozent geben</p>              | ,718       | ,599       |
| <p><input type="checkbox"/> Ich kann mich auch auf das Schreiben konzentrieren, wenn ich andere Dinge im Kopf habe. ] Um Ihnen die Beantwortung zu erleichtern, können Sie die Antwort in Prozent geben</p>            | ,843       | ,701       |
| <p><input type="checkbox"/> Ich kann mich wieder auf das Schreiben konzentrieren, wenn ich kurz an etwas anderes gedacht habe. ] Um Ihnen die Beantwortung zu erleichtern, können Sie die Antwort in Prozent geben</p> | ,898       | ,717       |
| <p><input type="checkbox"/> Ich kann mich wieder auf das Schreiben konzentrieren, wenn ich kurz ablenkt war. ] Um Ihnen die Beantwortung zu erleichtern, können Sie die Antwort in Prozent geben</p>                   | ,857       | ,665       |
| <p><input type="checkbox"/> Ich kann mich an meine festen Schreibzeiten halten. ] Um Ihnen die Beantwortung zu erleichtern, können Sie die Antwort in Prozent geben</p>                                                | ,777       | ,616       |
| <p><input type="checkbox"/> Ich kann mir feste Schreibzeiten einplanen. ] Um Ihnen die Beantwortung zu erleichtern, können Sie die Antwort in Prozent geben</p>                                                        | ,825       | ,638       |
| <p><input type="checkbox"/> Ich kann meine Schreibzeit effektiv nutzen. ] Um Ihnen die Beantwortung zu erleichtern, können Sie die Antwort in Prozent geben</p>                                                        | ,835       | ,713       |
| <p><input type="checkbox"/> Ich kann meine Texte bis zur Abgabefrist fertigstellen. ] Um Ihnen die Beantwortung zu erleichtern, können Sie die Antwort in Prozent geben</p>                                            | ,768       | ,632       |

**Kommunalitäten**

|                                                                                                                                                                                                                 | Anfänglich | Extraktion |
|-----------------------------------------------------------------------------------------------------------------------------------------------------------------------------------------------------------------|------------|------------|
| <input type="checkbox"/> Ich kann mir meine Zeit so einteilen, dass ich konzentriert an meinem Text arbeite. ] Um Ihnen die Beantwortung zu erleichtern, können Sie die Antwort in Prozent geben                | ,891       | ,779       |
| <input type="checkbox"/> Ich kann, auch wenn viel zu tun ist, Zeit finden, um konzentriert an meinem Text zu arbeiten. ] Um Ihnen die Beantwortung zu erleichtern, können Sie die Antwort in Prozent geben      | ,745       | ,627       |
| <input type="checkbox"/> Ich kann mir meinen Schreibplatz so gestalten, dass ich ungestört schreiben kann. ] Um Ihnen die Beantwortung zu erleichtern, können Sie die Antwort in Prozent geben                  | ,854       | ,786       |
| <input type="checkbox"/> Ich kann mir einen geeigneten Platz zum Schreiben auswählen. ] Um Ihnen die Beantwortung zu erleichtern, können Sie die Antwort in Prozent geben                                       | ,870       | ,734       |
| <input type="checkbox"/> Ich kann mich durch Belohnungen zum Weiterschreiben motivieren. ] Um Ihnen die Beantwortung zu erleichtern, können Sie die Antwort in Prozent geben                                    | ,904       | ,871       |
| <input type="checkbox"/> Ich kann mich beim Schreiben selbst belohnen, indem ich mein Vorankommen protokolliere. ] Um Ihnen die Beantwortung zu erleichtern, können Sie die Antwort in Prozent geben            | ,668       | ,506       |
| <input type="checkbox"/> Ich kann mich beim Schreiben belohnen, indem ich mir bei gutem Vorankommen einen freien Tag gönne. ] Um Ihnen die Beantwortung zu erleichtern, können Sie die Antwort in Prozent geben | ,640       | ,398       |

**Kommunalitäten**

|                                                                                                                                                                                                             | Anfänglich | Extraktion |
|-------------------------------------------------------------------------------------------------------------------------------------------------------------------------------------------------------------|------------|------------|
| <input type="checkbox"/> Ich kann mich beim Schreiben belohnen, indem ich mir schöne Dinge für gutes Vorankommen gönne. ] Um Ihnen die Beantwortung zu erleichtern, können Sie die Antwort in Prozent geben | ,872       | ,738       |
| <input type="checkbox"/> Ich kann mir gezieltes Feedback zu meinen Text einholen. ] Um Ihnen die Beantwortung zu erleichtern, können Sie die Antwort in Prozent geben                                       | ,878       | ,805       |
| <input type="checkbox"/> Ich kann mir zu der Rohfassung meines Textes kritisches Feedback einholen. ] Um Ihnen die Beantwortung zu erleichtern, können Sie die Antwort in Prozent geben                     | ,834       | ,777       |
| <input type="checkbox"/> Ich kann das Feedback Anderer zu meinen Texten umsetzen. ] Um Ihnen die Beantwortung zu erleichtern, können Sie die Antwort in Prozent geben                                       | ,842       | ,728       |
| <input type="checkbox"/> Ich kann mich daran orientieren, welche Strategien KommilitonInnen beim Schreiben einsetzen.] Um Ihnen die Beantwortung zu erleichtern, können Sie die Antwort in Prozent geben    | ,780       | ,648       |
| <input type="checkbox"/> Ich kann mich beim Schreiben selbst beobachten. ] Um Ihnen die Beantwortung zu erleichtern, können Sie die Antwort in Prozent geben                                                | ,735       | ,409       |
| <input type="checkbox"/> Ich kann mein Vorgehen beim Schreiben ändern, wenn ich merke, dass es nicht erfolgreich ist. ] Um Ihnen die Beantwortung zu erleichtern, können Sie die Antwort in Prozent geben   | ,841       | ,694       |

**Kommunalitäten**

|                                                                                                                                                                                               | Anfänglich | Extraktion |
|-----------------------------------------------------------------------------------------------------------------------------------------------------------------------------------------------|------------|------------|
| [ Ich kann meinen Zeitplan für das Schreiben anpassen, wenn ich merke, dass ich ihn nicht einhalten kann. ] Um Ihnen die Beantwortung zu erleichtern, können Sie die Antwort in Prozent geben | ,699       | ,525       |
| [ Ich kann mein Vorankommen beim Schreiben nachvollziehen. ] Um Ihnen die Beantwortung zu erleichtern, können Sie die Antwort in Prozent geben                                                | ,873       | ,697       |
| [ Ich kann mein Vorankommen beim Schreiben durch die Anzahl der geschriebenen Stunden nachvollziehen. ] Um Ihnen die Beantwortung zu erleichtern, können Sie die Antwort in Prozent geben     | ,786       | ,634       |
| [ Ich kann mein Vorankommen beim Schreiben durch die Anzahl der geschriebenen Seiten nachvollziehen. ] Um Ihnen die Beantwortung zu erleichtern, können Sie die Antwort in Prozent geben      | ,724       | ,523       |
| [ Ich kann ausdauernd an meinem Text arbeiten. ] Um Ihnen die Beantwortung zu erleichtern, können Sie die Antwort in Prozent geben                                                            | ,887       | ,782       |
| [ Ich kann mehrere Ideen in einem Text zusammen führen. ] Um Ihnen die Beantwortung zu erleichtern, können Sie die Antwort in Prozent geben                                                   | ,825       | ,731       |
| [ Ich kann eine Schreibblockade lösen und danach weiterschreiben. ] Um Ihnen die Beantwortung zu erleichtern, können Sie die Antwort in Prozent geben                                         | ,742       | ,545       |
| [ Ich kann mich lange Zeit auf das Schreiben konzentrieren, wenn es nötig ist. ] Um Ihnen die Beantwortung zu erleichtern, können Sie die Antwort in Prozent geben                            | ,858       | ,745       |



**Kommunalitäten**

|                                                                                                                                                                                | Anfänglich | Extraktion |
|--------------------------------------------------------------------------------------------------------------------------------------------------------------------------------|------------|------------|
| [ Ich kann die Qualität meines Textes realistisch einschätzen. ]<br>Um Ihnen die Beantwortung zu erleichtern, können Sie die Antwort in Prozent geben                          | ,832       | ,648       |
| [ Ich kann die Anforderungen, die an meinen Text gestellt werden, erfüllen. ] Um Ihnen die Beantwortung zu erleichtern, können Sie die Antwort in Prozent geben                | ,859       | ,755       |
| [ Ich kann die von mir selbst gesetzten Kriterien für die Qualität meiner Texte erreichen. ] Um Ihnen die Beantwortung zu erleichtern, können Sie die Antwort in Prozent geben | ,843       | ,765       |
| [ Ich kann die von mir selbst gesetzten Teilziele beim Schreiben erreichen. ] Um Ihnen die Beantwortung zu erleichtern, können Sie die Antwort in Prozent geben                | ,860       | ,652       |
| [ Ich kann von mir selbst zu hoch gesetzte Ansprüche heruntersetzen. ] Um Ihnen die Beantwortung zu erleichtern, können Sie die Antwort in Prozent geben                       | ,640       | ,417       |
| [ Ich kann meine Texte durch Überarbeitung besser machen. ] Um Ihnen die Beantwortung zu erleichtern, können Sie die Antwort in Prozent geben                                  | ,881       | ,782       |
| [ Ich kann meine Texte durch Überarbeitung verständlicher machen. ] Um Ihnen die Beantwortung zu erleichtern, können Sie die Antwort in Prozent geben                          | ,890       | ,800       |
| [ Ich kann mit der Qualität meiner Texte zufrieden sein. ] Um Ihnen die Beantwortung zu erleichtern, können Sie die Antwort in Prozent geben                                   | ,840       | ,730       |

**Kommunalitäten**

|                                                                                                                                                                      | Anfänglich | Extraktion |
|----------------------------------------------------------------------------------------------------------------------------------------------------------------------|------------|------------|
| [ Ich kann ein gutes Gefühl für das Vorankommen beim Schreiben entwickeln. ] Um Ihnen die Beantwortung zu erleichtern, können Sie die Antwort in Prozent geben       | ,887       | ,745       |
| [ Ich kann die Zeit, die mir zum Schreiben zur Verfügung steht, gut einschätzen. ] Um Ihnen die Beantwortung zu erleichtern, können Sie die Antwort in Prozent geben | ,866       | ,809       |
| [ Ich kann vermeiden, dass ich einen Fehler beim nächsten Mal wieder mache. ] Um Ihnen die Beantwortung zu erleichtern, können Sie die Antwort in Prozent geben      | ,814       | ,655       |
| [ Ich kann aus misslungenen Schreibverfahren lernen. ] Um Ihnen die Beantwortung zu erleichtern, können Sie die Antwort in Prozent geben                             | ,800       | ,664       |
| [ Ich kann mein Vorgehen bei Schreibprojekten durch Erfahrung verbessern. ] Um Ihnen die Beantwortung zu erleichtern, können Sie die Antwort in Prozent geben        | ,789       | ,613       |
| [ Ich kann einschätzen, was ich beim nächsten Mal anders machen muss. ] Um Ihnen die Beantwortung zu erleichtern, können Sie die Antwort in Prozent geben            | ,817       | ,679       |

Extraktionsmethode: Hauptachsen-Faktorenanalyse.

**Erklärte Gesamtvarianz**

| Faktor | Anfängliche Eigenwerte |               | Summen von quadrierten Faktorladungen für Extraktion |               | Summen von quadrierten Faktorladungen für Extraktion |              | Rotierte Summe der quadrierten Ladungen <sup>a</sup> |
|--------|------------------------|---------------|------------------------------------------------------|---------------|------------------------------------------------------|--------------|------------------------------------------------------|
|        | Gesamt                 | % der Varianz | Gesamt                                               | % der Varianz | Kumulierte %                                         | Kumulierte % |                                                      |
|        |                        |               |                                                      |               |                                                      |              |                                                      |
| 1      | 23,547                 | 33,638        | 23,245                                               | 33,208        | 33,208                                               | 17,523       |                                                      |
| 2      | 3,804                  | 5,435         | 3,482                                                | 4,975         | 38,183                                               | 14,997       |                                                      |
| 3      | 3,306                  | 4,723         | 3,007                                                | 4,295         | 42,478                                               | 12,324       |                                                      |
| 4      | 2,617                  | 3,738         | 2,328                                                | 3,326         | 45,803                                               | 14,778       |                                                      |
| 5      | 2,307                  | 3,296         | 1,948                                                | 2,783         | 48,587                                               | 6,584        |                                                      |
| 6      | 2,108                  | 3,012         | 1,799                                                | 2,570         | 51,157                                               | 12,960       |                                                      |
| 7      | 1,971                  | 2,816         | 1,616                                                | 2,309         | 53,466                                               | 2,211        |                                                      |
| 8      | 1,901                  | 2,716         | 1,567                                                | 2,238         | 55,704                                               | 15,421       |                                                      |
| 9      | 1,705                  | 2,436         | 1,363                                                | 1,947         | 57,651                                               | 9,175        |                                                      |
| 10     | 1,640                  | 2,343         | 1,336                                                | 1,909         | 59,560                                               | 16,171       |                                                      |
| 11     | 1,415                  | 2,022         | 1,110                                                | 1,586         | 61,146                                               | 2,172        |                                                      |
| 12     | 1,287                  | 1,839         | ,954                                                 | 1,363         | 62,509                                               | 10,390       |                                                      |
| 13     | 1,267                  | 1,810         | ,886                                                 | 1,265         | 63,774                                               | 5,353        |                                                      |
| 14     | 1,209                  | 1,727         | ,842                                                 | 1,203         | 64,977                                               | 2,978        |                                                      |
| 15     | 1,116                  | 1,595         | ,747                                                 | 1,068         | 66,044                                               | 5,998        |                                                      |
| 16     | 1,040                  | 1,485         | ,717                                                 | 1,025         | 67,069                                               | 9,251        |                                                      |
| 17     | ,961                   | 1,373         |                                                      |               |                                                      |              |                                                      |
| 18     | ,933                   | 1,333         |                                                      |               |                                                      |              |                                                      |
| 19     | ,881                   | 1,258         |                                                      |               |                                                      |              |                                                      |
| 20     | ,849                   | 1,213         |                                                      |               |                                                      |              |                                                      |
| 21     | ,764                   | 1,091         |                                                      |               |                                                      |              |                                                      |
| 22     | ,701                   | 1,002         |                                                      |               |                                                      |              |                                                      |
| 23     | ,677                   | ,967          |                                                      |               |                                                      |              |                                                      |
| 24     | ,671                   | ,959          |                                                      |               |                                                      |              |                                                      |
| 25     | ,644                   | ,920          |                                                      |               |                                                      |              |                                                      |
| 26     | ,621                   | ,887          |                                                      |               |                                                      |              |                                                      |
| 27     | ,589                   | ,841          |                                                      |               |                                                      |              |                                                      |
| 28     | ,569                   | ,812          |                                                      |               |                                                      |              |                                                      |
| 29     | ,527                   | ,752          |                                                      |               |                                                      |              |                                                      |
| 30     | ,516                   | ,737          |                                                      |               |                                                      |              |                                                      |
| 31     | ,488                   | ,697          |                                                      |               |                                                      |              |                                                      |
| 32     | ,465                   | ,664          |                                                      |               |                                                      |              |                                                      |
| 33     | ,434                   | ,620          |                                                      |               |                                                      |              |                                                      |
| 34     | ,418                   | ,597          |                                                      |               |                                                      |              |                                                      |

**Erklärte Gesamtvarianz**

| Faktor | Anfängliche Eigenwerte |               | Summen von quadrierten Faktorladungen für Extraktion |               | Rotierte Summe der quadrierten Ladungen <sup>a</sup> |
|--------|------------------------|---------------|------------------------------------------------------|---------------|------------------------------------------------------|
|        | Gesamt                 | % der Varianz | Gesamt                                               | % der Varianz |                                                      |
|        |                        |               |                                                      |               |                                                      |
| 35     | ,394                   | ,563          |                                                      | 91,918        |                                                      |
| 36     | ,367                   | ,524          |                                                      | 92,442        |                                                      |
| 37     | ,349                   | ,499          |                                                      | 92,941        |                                                      |
| 38     | ,344                   | ,491          |                                                      | 93,433        |                                                      |
| 39     | ,335                   | ,479          |                                                      | 93,911        |                                                      |
| 40     | ,308                   | ,440          |                                                      | 94,351        |                                                      |
| 41     | ,302                   | ,431          |                                                      | 94,782        |                                                      |
| 42     | ,272                   | ,389          |                                                      | 95,171        |                                                      |
| 43     | ,269                   | ,384          |                                                      | 95,554        |                                                      |
| 44     | ,251                   | ,359          |                                                      | 95,913        |                                                      |
| 45     | ,244                   | ,348          |                                                      | 96,261        |                                                      |
| 46     | ,222                   | ,317          |                                                      | 96,578        |                                                      |
| 47     | ,209                   | ,299          |                                                      | 96,877        |                                                      |
| 48     | ,205                   | ,293          |                                                      | 97,170        |                                                      |
| 49     | ,183                   | ,262          |                                                      | 97,432        |                                                      |
| 50     | ,158                   | ,226          |                                                      | 97,657        |                                                      |
| 51     | ,152                   | ,217          |                                                      | 97,875        |                                                      |
| 52     | ,148                   | ,212          |                                                      | 98,087        |                                                      |
| 53     | ,138                   | ,198          |                                                      | 98,284        |                                                      |
| 54     | ,120                   | ,171          |                                                      | 98,455        |                                                      |
| 55     | ,116                   | ,165          |                                                      | 98,620        |                                                      |
| 56     | ,107                   | ,153          |                                                      | 98,774        |                                                      |
| 57     | ,105                   | ,150          |                                                      | 98,924        |                                                      |
| 58     | ,095                   | ,136          |                                                      | 99,060        |                                                      |
| 59     | ,084                   | ,119          |                                                      | 99,180        |                                                      |
| 60     | ,079                   | ,113          |                                                      | 99,293        |                                                      |
| 61     | ,071                   | ,101          |                                                      | 99,394        |                                                      |
| 62     | ,068                   | ,098          |                                                      | 99,492        |                                                      |
| 63     | ,065                   | ,092          |                                                      | 99,584        |                                                      |
| 64     | ,059                   | ,084          |                                                      | 99,668        |                                                      |
| 65     | ,054                   | ,078          |                                                      | 99,745        |                                                      |
| 66     | ,046                   | ,066          |                                                      | 99,811        |                                                      |
| 67     | ,045                   | ,064          |                                                      | 99,875        |                                                      |
| 68     | ,032                   | ,046          |                                                      | 99,921        |                                                      |

**Erklärte Gesamtvarianz**

| Faktor | Anfängliche Eigenwerte |               | Summen von quadrierten Faktorladungen für Extraktion |               | Rotierte Summe der quadrierten Ladungen <sup>a</sup> |
|--------|------------------------|---------------|------------------------------------------------------|---------------|------------------------------------------------------|
|        | Gesamt                 | % der Varianz | Gesamt                                               | % der Varianz |                                                      |
| 69     | ,031                   | ,045          | 99,966                                               |               |                                                      |
| 70     | ,024                   | ,034          | 100,000                                              |               |                                                      |
|        |                        |               |                                                      | Kumulierte %  | Gesamt                                               |

Extraktionsmethode: Hauptachsen-Faktorenanalyse.

a. Wenn Faktoren korreliert sind, können die Summen der quadrierten Ladungen nicht addiert werden, um eine Gesamtvarianz zu erhalten.

**Screepplot**

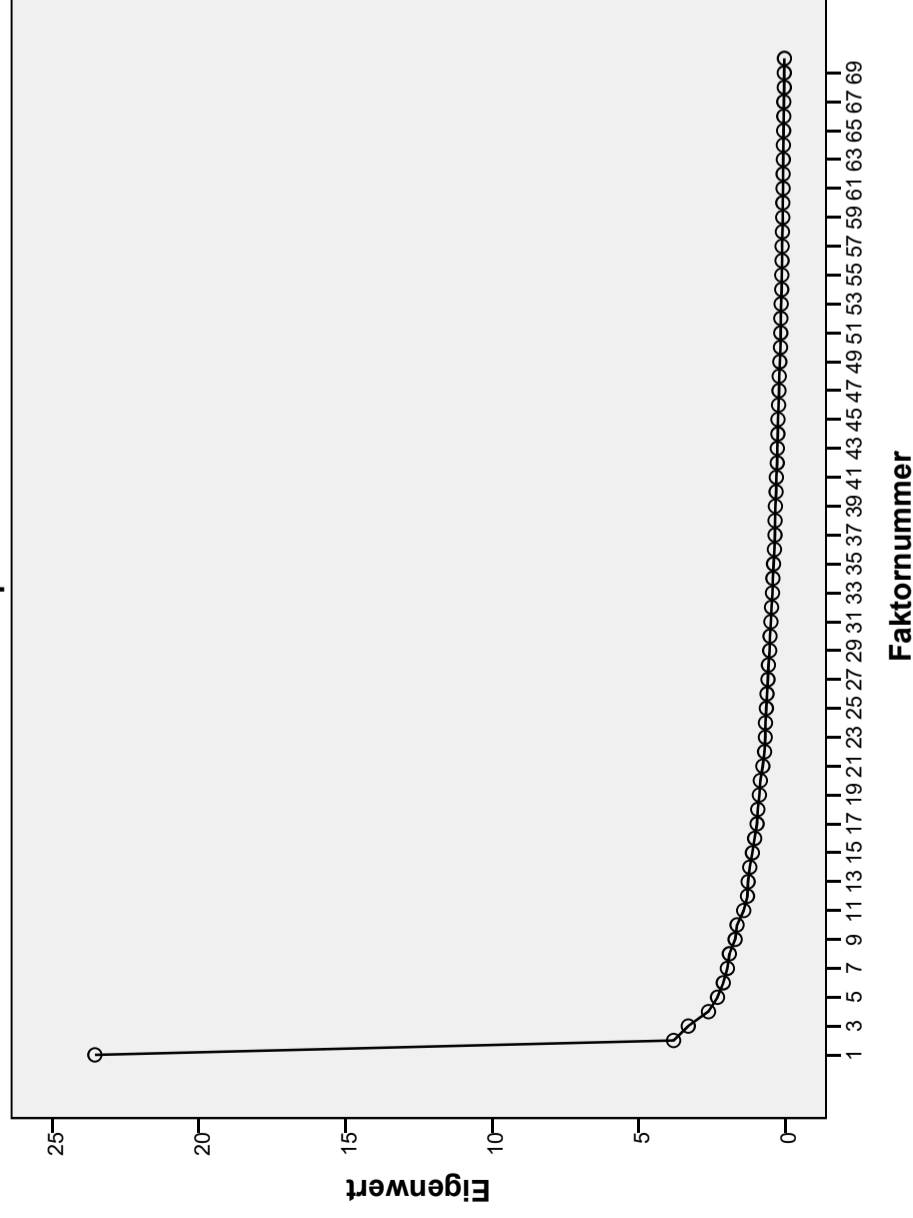

Faktorenmatrix<sup>a</sup>

|                                                                                                                                                                                                                 | Faktor |       |       |       |       |       |      |      |       |       |       |       |       |       |       |       |
|-----------------------------------------------------------------------------------------------------------------------------------------------------------------------------------------------------------------|--------|-------|-------|-------|-------|-------|------|------|-------|-------|-------|-------|-------|-------|-------|-------|
|                                                                                                                                                                                                                 | 1      | 2     | 3     | 4     | 5     | 6     | 7    | 8    | 9     | 10    | 11    | 12    | 13    | 14    | 15    | 16    |
| [ Ich kann die Anforderungen unterschiedlicher Textsorten (wie z. B. Hausarbeit, Protokoll, Critical Paper, usw.) verstehen.] Um Ihnen die Beantwortung zu erleichtern, können Sie die Antwort in Prozent geben | ,386   | -,242 | -,212 | -,058 | ,141  | ,039  | ,206 | ,101 | -,025 | ,054  | ,015  | -,101 | -,225 | ,047  | -,106 | -,120 |
| [ Ich kann mir konkrete Schreibziele setzen. ] Um Ihnen die Beantwortung zu erleichtern, können Sie die Antwort in Prozent geben                                                                                | ,623   | ,035  | ,382  | -,223 | -,010 | -,119 | ,115 | ,095 | -,069 | ,158  | -,038 | -,109 | -,038 | ,149  | ,045  | -,244 |
| [ Ich kann mein Schreibprojekt in kleinere Schreibziele unterteilen. ] Um Ihnen die Beantwortung zu erleichtern, können Sie die Antwort in Prozent geben                                                        | ,596   | -,090 | ,296  | -,312 | -,044 | -,182 | ,030 | ,118 | -,177 | ,178  | ,072  | -,083 | ,142  | ,097  | ,013  | -,019 |
| [ Ich kann meine Ideen für meinen Text vor dem Schreiben strukturieren. ] Um Ihnen die Beantwortung zu erleichtern, können Sie die Antwort in Prozent geben                                                     | ,550   | -,255 | ,024  | -,375 | -,135 | ,058  | ,120 | ,144 | -,045 | -,094 | -,228 | ,085  | -,016 | ,117  | -,015 | -,060 |
| [ Ich kann mir das Schreiben in sinnvolle Arbeitsschritte unterteilen. ] Um Ihnen die Beantwortung zu erleichtern, können Sie die Antwort in Prozent geben                                                      | ,699   | -,262 | ,232  | -,311 | -,167 | -,002 | ,017 | ,163 | ,053  | ,078  | -,021 | -,149 | ,061  | ,019  | ,084  | ,051  |
| [ Ich kann meine Ideen auch bei einem komplexen Thema gut organisieren. ] Um Ihnen die Beantwortung zu erleichtern, können Sie die Antwort in Prozent geben                                                     | ,618   | -,279 | -,085 | -,281 | -,143 | ,089  | ,218 | ,055 | ,189  | -,073 | -,134 | -,151 | -,011 | -,023 | ,081  | ,122  |
| [ Ich kann mich dazu motivieren mit dem Schreiben anzufangen. ] Um Ihnen die Beantwortung zu erleichtern, können Sie die Antwort in Prozent geben                                                               | ,508   | ,307  | ,059  | ,095  | -,386 | -,122 | ,078 | ,007 | -,050 | ,170  | -,005 | ,256  | -,025 | ,010  | ,037  | -,048 |

Faktorenmatrix<sup>a</sup>

|                                                                                                                                                                                                     | Faktor |       |       |       |       |       |       |       |       |       |       |       |       |       |       |       |
|-----------------------------------------------------------------------------------------------------------------------------------------------------------------------------------------------------|--------|-------|-------|-------|-------|-------|-------|-------|-------|-------|-------|-------|-------|-------|-------|-------|
|                                                                                                                                                                                                     | 1      | 2     | 3     | 4     | 5     | 6     | 7     | 8     | 9     | 10    | 11    | 12    | 13    | 14    | 15    | 16    |
| [ Ich kann mich erst auf den letzten Drücker zum Schreiben motivieren. ] Um Ihnen die Beantwortung zu erleichtern, können Sie die Antwort in Prozent geben                                          | ,343   | ,304  | ,185  | -,083 | -,451 | -,282 | ,177  | -,030 | -,059 | ,309  | -,079 | ,110  | -,070 | -,040 | ,144  | ,084  |
| [ Ich kann Probleme, die beim Schreiben auftauchen, überwinden. ] Um Ihnen die Beantwortung zu erleichtern, können Sie die Antwort in Prozent geben                                                 | ,643   | -,255 | -,180 | -,015 | -,118 | -,083 | ,055  | -,224 | ,084  | ,256  | ,072  | -,017 | -,217 | ,071  | -,017 | ,083  |
| [ Ich kann mich durch das Vorstellen negativer Konsequenzen des Nichtschreibens zum Weiterschreiben motivieren. ] Um Ihnen die Beantwortung zu erleichtern, können Sie die Antwort in Prozent geben | ,203   | ,252  | ,148  | -,067 | ,183  | ,040  | ,188  | -,297 | -,201 | -,108 | ,170  | -,007 | ,081  | ,291  | ,199  | -,017 |
| [ Ich kann mich durch das Vorstellen positiver Konsequenzen zum Weiterschreiben motivieren. ] Um Ihnen die Beantwortung zu erleichtern, können Sie die Antwort in Prozent geben                     | ,556   | ,379  | ,054  | -,203 | ,177  | ,025  | -,001 | -,139 | -,058 | -,141 | ,264  | ,121  | -,010 | ,070  | -,082 | ,050  |
| [ Ich kann Freude am Schreiben entwickeln. ] Um Ihnen die Beantwortung zu erleichtern, können Sie die Antwort in Prozent geben                                                                      | ,540   | ,293  | -,166 | ,028  | -,179 | ,336  | -,161 | -,143 | -,115 | ,364  | -,263 | -,113 | -,136 | -,031 | -,056 | -,053 |
| [ Ich kann Interesse für das Schreiben entwickeln. ] Um Ihnen die Beantwortung zu erleichtern, können Sie die Antwort in Prozent geben                                                              | ,609   | ,216  | -,165 | -,010 | -,039 | ,181  | -,065 | -,282 | -,065 | ,257  | -,211 | -,201 | -,122 | -,014 | -,120 | -,107 |
| [ Ich kann leicht Wege finden mein Interesse am Schreiben zu steigern. ] Um Ihnen die Beantwortung zu erleichtern, können Sie die Antwort in Prozent geben                                          | ,631   | ,305  | -,056 | -,170 | -,109 | ,040  | ,021  | ,019  | -,026 | ,164  | -,028 | ,061  | ,050  | -,065 | -,087 | ,153  |

Faktorenmatrix<sup>a</sup>

|                                                                                                                                                                                                   | Faktor |       |       |       |      |       |       |       |       |       |       |       |       |       |       |       |
|---------------------------------------------------------------------------------------------------------------------------------------------------------------------------------------------------|--------|-------|-------|-------|------|-------|-------|-------|-------|-------|-------|-------|-------|-------|-------|-------|
|                                                                                                                                                                                                   | 1      | 2     | 3     | 4     | 5    | 6     | 7     | 8     | 9     | 10    | 11    | 12    | 13    | 14    | 15    | 16    |
| [ Ich kann mir beim Schreiben vornehmen, gute Noten durch meine schriftlichen Arbeiten zu erzielen. ] Um Ihnen die Beantwortung zu erleichtern, können Sie die Antwort in Prozent geben           | ,512   | ,041  | -,336 | -,385 | ,089 | ,310  | ,380  | ,111  | -,098 | -,031 | ,086  | ,199  | -,034 | ,016  | ,134  | ,184  |
| [ Ich kann mir beim Schreiben vornehmen, durch meine schriftlichen Arbeiten zu zeigen, wie gut ich bin.] Um Ihnen die Beantwortung zu erleichtern, können Sie die Antwort in Prozent geben        | ,640   | ,014  | -,331 | -,286 | ,157 | ,245  | ,241  | ,088  | -,037 | ,019  | ,083  | ,159  | -,038 | -,035 | -,020 | ,038  |
| [ Ich kann mir vornehmen, durch das Schreiben mein Wissen zu erweitern. ] Um Ihnen die Beantwortung zu erleichtern, können Sie die Antwort in Prozent geben                                       | ,603   | ,357  | -,235 | -,011 | ,156 | ,203  | -,062 | ,043  | ,029  | -,072 | -,005 | ,018  | ,093  | -,211 | ,112  | -,089 |
| [ Ich kann mir vornehmen, durch das Schreiben zu neuen Erkenntnissen zu gelangen. ] Um Ihnen die Beantwortung zu erleichtern, können Sie die Antwort in Prozent geben                             | ,513   | ,316  | -,266 | ,047  | ,125 | ,275  | ,141  | -,005 | -,028 | ,017  | ,030  | -,061 | ,020  | -,094 | ,157  | -,121 |
| [ Ich kann mein Vorgehen beim Schreiben überwachen. ] Um Ihnen die Beantwortung zu erleichtern, können Sie die Antwort in Prozent geben                                                           | ,675   | -,054 | -,146 | -,023 | ,189 | -,244 | ,116  | ,045  | -,040 | ,218  | ,037  | -,105 | ,171  | -,121 | ,032  | -,016 |
| [ Ich kann mich beim Schreiben durch lautes Vorlesen von Textstellen unterstützen. ] Um Ihnen die Beantwortung zu erleichtern, können Sie die Antwort in Prozent geben                            | ,259   | ,188  | -,163 | ,014  | ,284 | ,091  | -,045 | ,181  | -,166 | ,096  | ,076  | -,136 | ,145  | ,292  | ,035  | -,003 |
| [ Ich kann mich beim Schreiben durch innerliches Vorlesen von bereits geschriebenen Textstellen unterstützen. ] Um Ihnen die Beantwortung zu erleichtern, können Sie die Antwort in Prozent geben | ,497   | ,089  | -,075 | ,190  | ,021 | ,318  | -,218 | ,224  | ,207  | ,137  | ,106  | ,027  | -,033 | ,118  | -,036 | -,204 |



Faktorenmatrix<sup>a</sup>

|                                                                                                                                                                               | Faktor |       |       |       |       |       |       |       |       |       |       |       |       |       |       |       |
|-------------------------------------------------------------------------------------------------------------------------------------------------------------------------------|--------|-------|-------|-------|-------|-------|-------|-------|-------|-------|-------|-------|-------|-------|-------|-------|
|                                                                                                                                                                               | 1      | 2     | 3     | 4     | 5     | 6     | 7     | 8     | 9     | 10    | 11    | 12    | 13    | 14    | 15    | 16    |
| [ Ich kann mir die Dinge, die ich in meinem Text beschreibe, bildlich vorstellen. ] Um Ihnen die Beantwortung zu erleichtern, können Sie die Antwort in Prozent geben         | ,452   | -,078 | -,232 | -,101 | ,129  | ,022  | -,034 | -,029 | ,264  | -,225 | -,026 | -,009 | ,029  | ,130  | -,088 | -,086 |
| [ Ich kann zunächst einen Entwurf meines Textes anfertigen. ] Um Ihnen die Beantwortung zu erleichtern, können Sie die Antwort in Prozent geben                               | ,449   | -,139 | ,089  | -,208 | ,193  | -,079 | -,220 | ,146  | ,184  | ,069  | -,146 | -,001 | ,061  | ,037  | -,027 | ,172  |
| [ Ich kann mir eine Gliederung erstellen, die mich beim Schreiben unterstützt. ] Um Ihnen die Beantwortung zu erleichtern, können Sie die Antwort in Prozent geben            | ,536   | -,230 | ,021  | -,284 | -,066 | -,006 | -,032 | ,347  | -,006 | -,026 | ,036  | -,123 | ,017  | -,096 | -,039 | -,155 |
| [ Ich kann mich auf das Schreiben konzentrieren. ] Um Ihnen die Beantwortung zu erleichtern, können Sie die Antwort in Prozent geben                                          | ,806   | ,122  | -,192 | ,140  | -,128 | ,050  | -,002 | ,081  | -,020 | ,045  | -,112 | ,040  | ,015  | ,202  | -,040 | -,056 |
| [ Ich kann Ablenkungen beim Schreiben ausblenden. ] Um Ihnen die Beantwortung zu erleichtern, können Sie die Antwort in Prozent geben                                         | ,501   | ,160  | -,346 | ,323  | -,116 | -,242 | ,079  | ,199  | ,063  | -,023 | ,186  | -,021 | ,000  | -,056 | ,045  | -,071 |
| [ Ich kann mich auf das Schreiben konzentrieren, auch wenn um mich herum viel passiert. ] Um Ihnen die Beantwortung zu erleichtern, können Sie die Antwort in Prozent geben   | ,375   | ,101  | -,410 | ,326  | ,103  | -,188 | ,194  | ,140  | ,126  | ,086  | ,165  | -,042 | ,077  | ,063  | ,004  | -,092 |
| [ Ich kann mich auch auf das Schreiben konzentrieren, wenn ich andere Dinge im Kopf habe. ] Um Ihnen die Beantwortung zu erleichtern, können Sie die Antwort in Prozent geben | ,542   | ,214  | -,268 | ,269  | -,120 | -,307 | ,217  | ,066  | ,118  | -,146 | ,009  | -,010 | -,059 | ,030  | ,058  | ,122  |

Faktorenmatrix<sup>a</sup>

|                                                                                                                                                                                          | Faktor |       |       |       |       |       |       |       |       |       |       |       |       |       |       |       |
|------------------------------------------------------------------------------------------------------------------------------------------------------------------------------------------|--------|-------|-------|-------|-------|-------|-------|-------|-------|-------|-------|-------|-------|-------|-------|-------|
|                                                                                                                                                                                          | 1      | 2     | 3     | 4     | 5     | 6     | 7     | 8     | 9     | 10    | 11    | 12    | 13    | 14    | 15    | 16    |
| [ Ich kann mich wieder auf das Schreiben konzentrieren, wenn ich kurz an etwas anderes gedacht habe. ] Um Ihnen die Beantwortung zu erleichtern, können Sie die Antwort in Prozent geben | ,668   | ,180  | -,120 | ,252  | -,185 | ,051  | -,044 | ,297  | -,037 | -,093 | -,084 | ,024  | ,048  | ,020  | ,047  | -,107 |
| [ Ich kann mich wieder auf das Schreiben konzentrieren, wenn ich kurz ablenkt war. ] Um Ihnen die Beantwortung zu erleichtern, können Sie die Antwort in Prozent geben                   | ,627   | ,188  | -,168 | ,225  | -,239 | -,059 | -,027 | ,251  | ,002  | -,067 | ,031  | ,048  | -,006 | ,129  | -,076 | ,059  |
| [ Ich kann mich an meine festen Schreibzeiten halten.] Um Ihnen die Beantwortung zu erleichtern, können Sie die Antwort in Prozent geben                                                 | ,555   | ,264  | ,230  | -,118 | ,149  | -,183 | ,102  | ,123  | ,028  | -,095 | -,050 | -,126 | -,158 | ,193  | -,004 | -,006 |
| [ Ich kann mir feste Schreibzeiten einplanen. ] Um Ihnen die Beantwortung zu erleichtern, können Sie die Antwort in Prozent geben                                                        | ,473   | ,336  | ,333  | -,255 | ,270  | -,146 | -,010 | ,052  | -,079 | -,034 | ,063  | -,096 | -,005 | ,048  | -,039 | -,063 |
| [ Ich kann meine Schreibzeit effektiv nutzen. ] Um Ihnen die Beantwortung zu erleichtern, können Sie die Antwort in Prozent geben                                                        | ,758   | -,059 | ,138  | -,007 | -,137 | -,120 | -,136 | ,047  | ,026  | -,173 | -,133 | -,008 | -,034 | ,030  | ,094  | -,042 |
| [ Ich kann meine Texte bis zur Abgabefrist fertigstellen. ] Um Ihnen die Beantwortung zu erleichtern, können Sie die Antwort in Prozent geben                                            | ,432   | -,148 | ,130  | ,165  | -,149 | ,057  | ,242  | -,347 | -,243 | -,242 | -,030 | ,115  | -,051 | ,170  | ,098  | -,045 |
| [ Ich kann mir meine Zeit so einteilen, dass ich konzentriert an meinem Text arbeite. ] Um Ihnen die Beantwortung zu erleichtern, können Sie die Antwort in Prozent geben                | ,786   | ,056  | ,131  | -,032 | -,132 | -,060 | -,064 | ,102  | ,004  | -,292 | -,111 | ,024  | -,016 | -,041 | ,048  | ,042  |
| [ Ich kann, auch wenn viel zu tun ist, Zeit finden, um konzentriert an meinem Text zu arbeiten. ] Um Ihnen die Beantwortung zu erleichtern, können Sie die Antwort in Prozent geben      | ,619   | ,011  | ,039  | ,017  | -,016 | -,241 | ,027  | ,147  | -,070 | -,245 | -,005 | ,118  | -,151 | -,110 | -,201 | ,075  |

Faktorenmatrix<sup>a</sup>

|                                                                                                                                                                                          | Faktor |       |      |       |       |       |       |       |       |       |       |       |       |       |       |       |
|------------------------------------------------------------------------------------------------------------------------------------------------------------------------------------------|--------|-------|------|-------|-------|-------|-------|-------|-------|-------|-------|-------|-------|-------|-------|-------|
|                                                                                                                                                                                          | 1      | 2     | 3    | 4     | 5     | 6     | 7     | 8     | 9     | 10    | 11    | 12    | 13    | 14    | 15    | 16    |
| [ Ich kann mir meinen Schreibplatz so gestalten, dass ich ungestört schreiben kann. ] Um Ihnen die Beantwortung zu erleichtern, können Sie die Antwort in Prozent geben                  | ,645   | ,200  | ,025 | ,118  | -,042 | ,124  | -,172 | ,089  | -,292 | -,165 | ,099  | -,303 | -,009 | -,103 | ,089  | ,167  |
| [ Ich kann mir einen geeigneten Platz zum Schreiben auswählen. ] Um Ihnen die Beantwortung zu erleichtern, können Sie die Antwort in Prozent geben                                       | ,571   | -,030 | ,220 | ,208  | -,083 | ,050  | -,181 | ,101  | -,423 | -,049 | ,095  | -,145 | ,018  | -,127 | ,013  | ,187  |
| [ Ich kann mich durch Belohnungen zum Weiterschreiben motivieren. ] Um Ihnen die Beantwortung zu erleichtern, können Sie die Antwort in Prozent geben                                    | ,535   | ,366  | ,354 | -,133 | -,096 | ,254  | ,042  | -,149 | ,360  | -,070 | ,235  | ,005  | ,004  | -,112 | -,082 | ,018  |
| [ Ich kann mich beim Schreiben selbst belohnen, indem ich mein Vorankommen protokolliere. ] Um Ihnen die Beantwortung zu erleichtern, können Sie die Antwort in Prozent geben            | ,312   | ,365  | ,263 | -,005 | ,236  | -,189 | ,072  | ,092  | ,136  | ,063  | -,002 | -,195 | -,050 | -,191 | ,034  | ,013  |
| [ Ich kann mich beim Schreiben belohnen, indem ich mir bei gutem Vorankommen einen freien Tag gönne. ] Um Ihnen die Beantwortung zu erleichtern, können Sie die Antwort in Prozent geben | ,395   | ,245  | ,101 | -,067 | -,077 | ,064  | -,201 | ,099  | ,040  | ,177  | ,091  | ,198  | ,076  | ,012  | -,081 | ,118  |
| [ Ich kann mich beim Schreiben belohnen, indem ich mir schöne Dinge für gutes Vorankommen gönne. ] Um Ihnen die Beantwortung zu erleichtern, können Sie die Antwort in Prozent geben     | ,451   | ,289  | ,326 | -,190 | -,222 | ,280  | ,067  | -,078 | ,222  | -,094 | ,277  | ,025  | ,000  | -,068 | -,166 | -,058 |
| [ Ich kann mir gezieltes Feedback zu meinem Text einholen. ] Um Ihnen die Beantwortung zu erleichtern, können Sie die Antwort in Prozent geben                                           | ,357   | -,234 | ,414 | ,475  | ,120  | ,169  | ,342  | ,071  | -,124 | ,130  | -,011 | ,035  | ,064  | -,075 | -,052 | ,122  |

Faktorenmatrix<sup>a</sup>

|                                                                                                                                                                                               | Faktor |       |      |      |      |       |       |       |       |       |       |       |       |       |       |       |
|-----------------------------------------------------------------------------------------------------------------------------------------------------------------------------------------------|--------|-------|------|------|------|-------|-------|-------|-------|-------|-------|-------|-------|-------|-------|-------|
|                                                                                                                                                                                               | 1      | 2     | 3    | 4    | 5    | 6     | 7     | 8     | 9     | 10    | 11    | 12    | 13    | 14    | 15    | 16    |
| [ Ich kann mir zu der Rohfassung meines Textes kritisches Feedback einholen. ] Um Ihnen die Beantwortung zu erleichtern, können Sie die Antwort in Prozent geben                              | ,308   | -,284 | ,424 | ,464 | ,040 | ,282  | ,246  | ,155  | ,100  | ,142  | -,040 | -,024 | -,016 | ,061  | ,039  | -,048 |
| [ Ich kann das Feedback Anderer zu meinen Texten umsetzen. ] Um Ihnen die Beantwortung zu erleichtern, können Sie die Antwort in Prozent geben                                                | ,428   | -,228 | ,438 | ,330 | ,034 | ,318  | ,169  | ,094  | ,093  | -,155 | -,022 | -,062 | ,006  | -,118 | -,019 | -,034 |
| [ Ich kann mich daran orientieren, welche Strategien KommilitonInnen beim Schreiben einsetzen.] Um Ihnen die Beantwortung zu erleichtern, können Sie die Antwort in Prozent geben             | ,194   | ,229  | ,226 | ,131 | ,402 | ,095  | ,129  | ,122  | ,155  | ,110  | -,350 | ,194  | -,177 | ,031  | ,115  | ,214  |
| [ Ich kann mich beim Schreiben selbst beobachten. ] Um Ihnen die Beantwortung zu erleichtern, können Sie die Antwort in Prozent geben                                                         | ,304   | ,147  | ,024 | ,050 | ,256 | -,241 | ,306  | -,018 | ,111  | ,006  | -,090 | -,026 | ,138  | -,166 | -,050 | -,064 |
| [ Ich kann mein Vorgehen beim Schreiben ändern, wenn ich merke, dass es nicht erfolgreich ist. ] Um Ihnen die Beantwortung zu erleichtern, können Sie die Antwort in Prozent geben            | ,761   | -,160 | ,017 | ,023 | ,088 | -,012 | -,153 | -,089 | ,092  | -,011 | ,013  | ,000  | ,123  | ,090  | ,129  | ,033  |
| [ Ich kann meinen Zeitplan für das Schreiben anpassen, wenn ich merke, dass ich ihn nicht einhalten kann. ] Um Ihnen die Beantwortung zu erleichtern, können Sie die Antwort in Prozent geben | ,413   | -,161 | ,214 | ,100 | ,091 | ,000  | ,177  | -,042 | -,228 | ,012  | ,041  | ,025  | ,006  | ,115  | -,402 | -,050 |
| [ Ich kann mein Vorankommen beim Schreiben nachvollziehen. ] Um Ihnen die Beantwortung zu erleichtern, können Sie die Antwort in Prozent geben                                                | ,748   | -,194 | ,053 | ,069 | ,029 | -,007 | -,097 | -,225 | -,055 | ,033  | -,007 | -,089 | ,133  | -,027 | ,010  | -,017 |

Faktorenmatrix<sup>a</sup>

|                                                                                                                                                                                           | Faktor |       |       |       |       |       |       |       |       |       |       |       |       |       |       |       |
|-------------------------------------------------------------------------------------------------------------------------------------------------------------------------------------------|--------|-------|-------|-------|-------|-------|-------|-------|-------|-------|-------|-------|-------|-------|-------|-------|
|                                                                                                                                                                                           | 1      | 2     | 3     | 4     | 5     | 6     | 7     | 8     | 9     | 10    | 11    | 12    | 13    | 14    | 15    | 16    |
| [ Ich kann mein Vorankommen beim Schreiben durch die Anzahl der geschriebenen Stunden nachvollziehen. ] Um Ihnen die Beantwortung zu erleichtern, können Sie die Antwort in Prozent geben | ,385   | ,314  | -,010 | ,036  | ,437  | -,248 | ,030  | -,223 | -,025 | ,035  | -,242 | ,013  | ,003  | -,083 | -,118 | -,017 |
| [ Ich kann mein Vorankommen beim Schreiben durch die Anzahl der geschriebenen Seiten nachvollziehen. ] Um Ihnen die Beantwortung zu erleichtern, können Sie die Antwort in Prozent geben  | ,536   | ,068  | ,067  | ,136  | ,071  | ,084  | -,058 | -,333 | ,135  | -,045 | -,022 | ,037  | ,141  | ,013  | ,198  | -,007 |
| [ Ich kann ausdauernd an meinem Text arbeiten. ] Um Ihnen die Beantwortung zu erleichtern, können Sie die Antwort in Prozent geben                                                        | ,728   | ,123  | -,183 | ,165  | -,066 | -,129 | -,018 | -,249 | ,129  | -,151 | -,067 | -,128 | -,057 | ,028  | -,170 | ,009  |
| [ Ich kann mehrere Ideen in einem Text zusammen führen. ] Um Ihnen die Beantwortung zu erleichtern, können Sie die Antwort in Prozent geben                                               | ,658   | -,365 | -,151 | -,002 | -,007 | -,077 | ,087  | -,047 | -,118 | ,004  | -,009 | ,068  | ,209  | -,227 | ,075  | -,085 |
| [ Ich kann eine Schreibblockade lösen und danach weiterschreiben. ] Um Ihnen die Beantwortung zu erleichtern, können Sie die Antwort in Prozent geben                                     | ,620   | -,043 | ,016  | ,092  | -,089 | -,100 | ,044  | -,171 | ,159  | ,052  | ,094  | -,119 | ,026  | ,083  | ,034  | ,203  |
| [ Ich kann mich lange Zeit auf das Schreiben konzentrieren, wenn es nötig ist. ] Um Ihnen die Beantwortung zu erleichtern, können Sie die Antwort in Prozent geben                        | ,687   | ,090  | -,163 | ,086  | -,120 | ,116  | -,041 | -,094 | -,055 | -,262 | -,139 | -,215 | ,038  | ,106  | -,137 | ,155  |
| [ Ich kann die Qualität meines Textes realistisch einschätzen. ] Um Ihnen die Beantwortung zu erleichtern, können Sie die Antwort in Prozent geben                                        | ,613   | -,343 | -,114 | -,149 | ,084  | ,090  | -,002 | -,085 | ,056  | -,187 | -,222 | -,031 | -,025 | -,072 | ,052  | -,030 |

Faktorenmatrix<sup>a</sup>

|                                                                                                                                                                                | Faktor |       |       |       |       |       |       |       |       |       |       |       |       |       |       |       |
|--------------------------------------------------------------------------------------------------------------------------------------------------------------------------------|--------|-------|-------|-------|-------|-------|-------|-------|-------|-------|-------|-------|-------|-------|-------|-------|
|                                                                                                                                                                                | 1      | 2     | 3     | 4     | 5     | 6     | 7     | 8     | 9     | 10    | 11    | 12    | 13    | 14    | 15    | 16    |
| [ Ich kann die Anforderungen, die an meinen Text gestellt werden, erfüllen. ] Um Ihnen die Beantwortung zu erleichtern, können Sie die Antwort in Prozent geben                | ,639   | -,387 | -,219 | -,043 | -,040 | -,037 | ,194  | -,150 | -,149 | ,071  | ,119  | ,071  | ,064  | -,063 | -,162 | -,059 |
| [ Ich kann die von mir selbst gesetzten Kriterien für die Qualität meiner Texte erreichen. ] Um Ihnen die Beantwortung zu erleichtern, können Sie die Antwort in Prozent geben | ,771   | -,169 | -,136 | ,025  | -,089 | ,110  | -,001 | -,091 | ,204  | ,106  | -,074 | -,057 | ,115  | ,030  | -,065 | ,124  |
| [ Ich kann die von mir selbst gesetzten Teilziele beim Schreiben erreichen. ] Um Ihnen die Beantwortung zu erleichtern, können Sie die Antwort in Prozent geben                | ,747   | -,011 | ,135  | -,020 | -,095 | -,188 | -,122 | -,048 | ,093  | -,022 | ,044  | ,037  | ,011  | -,004 | -,028 | -,019 |
| [ Ich kann von mir selbst zu hoch gesetzte Ansprüche heruntersetzen.] Um Ihnen die Beantwortung zu erleichtern, können Sie die Antwort in Prozent geben                        | ,278   | -,159 | ,199  | ,136  | ,050  | -,028 | -,213 | ,031  | ,232  | ,087  | -,010 | ,105  | ,277  | ,236  | ,027  | ,022  |
| [ Ich kann meine Texte durch Überarbeitung besser machen. ] Um Ihnen die Beantwortung zu erleichtern, können Sie die Antwort in Prozent geben                                  | ,604   | -,324 | -,034 | ,117  | ,176  | -,071 | -,163 | -,071 | -,024 | ,147  | ,291  | -,028 | -,314 | ,047  | ,129  | ,064  |
| [ Ich kann meine Texte durch Überarbeitung verständlicher machen. ] Um Ihnen die Beantwortung zu erleichtern, können Sie die Antwort in Prozent geben                          | ,584   | -,404 | ,097  | ,021  | ,177  | -,097 | -,135 | -,063 | ,172  | ,093  | ,248  | -,016 | -,339 | -,078 | ,045  | ,028  |
| [ Ich kann mit der Qualität meiner Texte zufrieden sein. ] Um Ihnen die Beantwortung zu erleichtern, können Sie die Antwort in Prozent geben                                   | ,698   | -,339 | -,187 | -,030 | ,028  | -,066 | -,062 | -,079 | ,059  | ,073  | ,051  | ,115  | ,197  | -,016 | -,081 | ,083  |

Faktorenmatrix<sup>a</sup>

|                                                                                                                                                                      | Faktor |       |       |       |       |       |       |       |       |       |       |       |       |       |       |       |
|----------------------------------------------------------------------------------------------------------------------------------------------------------------------|--------|-------|-------|-------|-------|-------|-------|-------|-------|-------|-------|-------|-------|-------|-------|-------|
|                                                                                                                                                                      | 1      | 2     | 3     | 4     | 5     | 6     | 7     | 8     | 9     | 10    | 11    | 12    | 13    | 14    | 15    | 16    |
| [ Ich kann ein gutes Gefühl für das Vorankommen beim Schreiben entwickeln. ] Um Ihnen die Beantwortung zu erleichtern, können Sie die Antwort in Prozent geben       | ,800   | ,007  | ,083  | -,022 | ,007  | -,035 | -,089 | -,127 | -,045 | ,108  | ,051  | ,041  | ,161  | -,141 | ,049  | -,075 |
| [ Ich kann die Zeit, die mir zum Schreiben zur Verfügung steht, gut einschätzen. ] Um Ihnen die Beantwortung zu erleichtern, können Sie die Antwort in Prozent geben | ,713   | -,012 | ,244  | ,046  | -,111 | -,154 | -,027 | -,176 | ,033  | -,144 | -,097 | ,186  | -,110 | -,060 | ,127  | -,272 |
| [ Ich kann vermeiden, dass ich einen Fehler beim nächsten Mal wieder mache. ] Um Ihnen die Beantwortung zu erleichtern, können Sie die Antwort in Prozent geben      | ,713   | -,070 | -,172 | -,027 | ,118  | ,015  | -,209 | -,047 | -,114 | -,030 | -,010 | -,001 | -,118 | ,009  | ,143  | -,052 |
| [ Ich kann aus misslungenen Schreibverfahren lernen. ] Um Ihnen die Beantwortung zu erleichtern, können Sie die Antwort in Prozent geben                             | ,625   | ,028  | ,130  | ,041  | ,218  | ,023  | -,250 | -,026 | -,203 | ,017  | -,078 | ,266  | ,038  | -,047 | -,142 | ,017  |
| [ Ich kann mein Vorgehen bei Schreibprojekten durch Erfahrung verbessern. ] Um Ihnen die Beantwortung zu erleichtern, können Sie die Antwort in Prozent geben        | ,687   | -,074 | ,017  | -,020 | ,036  | ,111  | -,206 | ,081  | -,128 | -,064 | ,065  | ,135  | -,103 | -,114 | ,062  | -,050 |
| [ Ich kann einschätzen, was ich beim nächsten Mal anders machen muss. ] Um Ihnen die Beantwortung zu erleichtern, können Sie die Antwort in Prozent geben            | ,659   | -,098 | -,074 | ,130  | ,240  | -,030 | -,223 | ,166  | -,060 | -,032 | -,049 | ,249  | -,076 | ,037  | -,019 | ,014  |

Extraktionsmethode: Hauptachsenfaktorenanalyse.

a. 16 Faktoren extrahiert. Es werden 13 Iterationen benötigt.









| Musterantworten                                                                                                                                                                                                  |       | 1     | 2     | 3     | 4     | 5     | 6     | 7     | 8     | 9     | 10    | 11    | 12    | 13    | 14   | 15    | 16 |
|------------------------------------------------------------------------------------------------------------------------------------------------------------------------------------------------------------------|-------|-------|-------|-------|-------|-------|-------|-------|-------|-------|-------|-------|-------|-------|------|-------|----|
| 1. Ich kann die Anforderungen unterschiedlicher Textsorten (wie z. B. Hausarbeit, Protokoll, Critical Paper, usw.) verstehen.] Um Ihnen die Beantwortung zu erleichtern, können Sie die Antwort in Prozent geben | 0,314 | ,151  | ,303  | ,208  | -,106 | ,067  | ,097  | -,160 | -,218 | -,464 | -,166 | -,073 | ,107  | ,018  | ,215 | ,008  |    |
| 2. Ich kann mir konkrete Schreibziele setzen. ] Um Ihnen die Beantwortung zu erleichtern, können Sie die Antwort in Prozent geben                                                                                | ,571  | -,111 | ,022  | ,162  | ,028  | ,216  | ,084  | -,156 | -,145 | -,002 | ,217  | ,177  | ,311  | ,040  | ,109 | ,087  |    |
| 3. Ich kann mein Schreibprojekt in kleinere Schreibziele unterteilen. ] Um Ihnen die Beantwortung zu erleichtern, können Sie die Antwort in Prozent geben                                                        | ,546  | -,171 | -,018 | -,102 | -,023 | ,079  | -,032 | ,146  | -,011 | ,252  | ,230  | ,081  | ,354  | ,185  | ,125 | -,071 |    |
| 4. Ich kann meine Ideen für meinen Text vor dem Schreiben strukturieren. ] Um Ihnen die Beantwortung zu erleichtern, können Sie die Antwort in Prozent geben                                                     | ,949  | -,186 | -,183 | ,013  | -,168 | -,038 | -,192 | ,294  | ,024  | ,071  | ,058  | -,002 | -,056 | -,093 | ,101 |       |    |

Mustermatrix<sup>a</sup>

|                                                                                                                                                                                                                 | Faktor |       |       |       |       |       |       |       |       |       |       |       |       |       |      |       |
|-----------------------------------------------------------------------------------------------------------------------------------------------------------------------------------------------------------------|--------|-------|-------|-------|-------|-------|-------|-------|-------|-------|-------|-------|-------|-------|------|-------|
|                                                                                                                                                                                                                 | 1      | 2     | 3     | 4     | 5     | 6     | 7     | 8     | 9     | 10    | 11    | 12    | 13    | 14    | 15   | 16    |
| [ Ich kann die Anforderungen unterschiedlicher Textsorten (wie z. B. Hausarbeit, Protokoll, Critical Paper, usw.) verstehen.] Um Ihnen die Beantwortung zu erleichtern, können Sie die Antwort in Prozent geben | ,314   | ,151  | ,303  | ,208  | -,106 | ,067  | ,097  | -,160 | -,218 | -,464 | -,166 | -,073 | ,107  | ,018  | ,215 | ,008  |
| [ Ich kann mir konkrete Schreibziele setzen. ] Um Ihnen die Beantwortung zu erleichtern, können Sie die Antwort in Prozent geben                                                                                | ,571   | -,111 | ,022  | ,162  | ,028  | ,216  | ,084  | -,156 | -,145 | -,002 | ,217  | ,177  | ,311  | ,040  | ,109 | ,087  |
| [ Ich kann mein Schreibprojekt in kleinere Schreibziele unterteilen. ] Um Ihnen die Beantwortung zu erleichtern, können Sie die Antwort in Prozent geben                                                        | ,546   | -,171 | -,018 | -,102 | -,023 | ,079  | -,032 | ,146  | -,011 | ,252  | ,230  | ,081  | ,354  | ,185  | ,125 | -,071 |
| [ Ich kann meine Ideen für meinen Text vor dem Schreiben strukturieren. ] Um Ihnen die Beantwortung zu erleichtern, können Sie die Antwort in Prozent geben                                                     | ,949   | -,186 | -,183 | ,013  | -,168 | -,038 | -,192 | ,294  | ,024  | ,071  | ,058  | -,002 | -,056 | -,093 | ,101 |       |

**Mustermatrix<sup>a</sup>**

|                                                                                                                                                                                                     | Faktor |       |       |       |       |       |       |       |      |       |       |       |       |       |       |       |
|-----------------------------------------------------------------------------------------------------------------------------------------------------------------------------------------------------|--------|-------|-------|-------|-------|-------|-------|-------|------|-------|-------|-------|-------|-------|-------|-------|
|                                                                                                                                                                                                     | 1      | 2     | 3     | 4     | 5     | 6     | 7     | 8     | 9    | 10    | 11    | 12    | 13    | 14    | 15    | 16    |
| [ Ich kann mir das Schreiben in sinnvolle Arbeitsschritte unterteilen. ] Um Ihnen die Beantwortung zu erleichtern, können Sie die Antwort in Prozent geben                                          | ,869   | -,169 | ,061  | -,043 | ,064  | -,100 | ,065  | ,137  | ,062 | ,209  | ,141  | -,097 | ,070  | ,062  | -,094 | -,149 |
| [ Ich kann meine Ideen auch bei einem komplexen Thema gut organisieren. ] Um Ihnen die Beantwortung zu erleichtern, können Sie die Antwort in Prozent geben                                         | ,886   | -,003 | ,017  | ,018  | ,040  | -,043 | ,058  | -,045 | ,338 | -,069 | ,013  | -,068 | -,149 | -,075 | -,162 | -,293 |
| [ Ich kann mich dazu motivieren mit dem Schreiben anzufangen. ] Um Ihnen die Beantwortung zu erleichtern, können Sie die Antwort in Prozent geben                                                   | -,109  | ,392  | -,082 | ,143  | ,114  | -,111 | -,012 | -,116 | ,051 | ,036  | ,630  | ,094  | -,188 | -,018 | ,000  | ,194  |
| [ Ich kann mich erst auf den letzten Drücker zum Schreiben motivieren. ] Um Ihnen die Beantwortung zu erleichtern, können Sie die Antwort in Prozent geben                                          | ,091   | ,197  | -,007 | ,192  | -,010 | ,057  | -,068 | -,033 | ,033 | -,151 | ,880  | ,052  | -,269 | -,129 | -,157 | -,092 |
| [ Ich kann Probleme, die beim Schreiben auftauchen, überwinden. ] Um Ihnen die Beantwortung zu erleichtern, können Sie die Antwort in Prozent geben                                                 | ,083   | ,105  | ,582  | ,342  | -,017 | -,145 | -,048 | -,150 | ,087 | -,042 | ,221  | ,034  | -,141 | ,004  | ,045  | -,139 |
| [ Ich kann mich durch das Vorstellen negativer Konsequenzen des Nichtschreibens zum Weiterschreiben motivieren. ] Um Ihnen die Beantwortung zu erleichtern, können Sie die Antwort in Prozent geben | -,219  | -,105 | -,010 | -,174 | ,062  | ,013  | -,026 | ,037  | ,258 | ,118  | ,005  | ,906  | ,556  | ,003  | ,002  | -,088 |
| [ Ich kann mich durch das Vorstellen positiver Konsequenzen zum Weiterschreiben motivieren. ] Um Ihnen die Beantwortung zu erleichtern, können Sie die Antwort in Prozent geben                     | -,240  | -,003 | ,090  | -,171 | ,471  | ,129  | -,207 | ,087  | ,336 | ,022  | -,056 | ,314  | ,203  | ,030  | ,164  | ,098  |

Mustermatrix<sup>a</sup>

|                                                                                                                                                                                             | Faktor |       |       |       |       |       |       |       |       |       |       |       |       |       |       |       |
|---------------------------------------------------------------------------------------------------------------------------------------------------------------------------------------------|--------|-------|-------|-------|-------|-------|-------|-------|-------|-------|-------|-------|-------|-------|-------|-------|
|                                                                                                                                                                                             | 1      | 2     | 3     | 4     | 5     | 6     | 7     | 8     | 9     | 10    | 11    | 12    | 13    | 14    | 15    | 16    |
| [ Ich kann Freude am Schreiben entwickeln. ] Um Ihnen die Beantwortung zu erleichtern, können Sie die Antwort in Prozent geben                                                              | -,040  | -,211 | -,013 | 1,266 | -,031 | -,066 | -,015 | ,133  | -,024 | -,234 | ,231  | -,162 | ,030  | -,113 | -,008 | ,085  |
| [ Ich kann Interesse für das Schreiben entwickeln. ] Um Ihnen die Beantwortung zu erleichtern, können Sie die Antwort in Prozent geben                                                      | -,006  | -,174 | ,046  | 1,127 | ,014  | ,190  | -,065 | ,010  | -,131 | -,292 | ,060  | -,042 | ,040  | ,015  | ,109  | -,013 |
| [ Ich kann leicht Wege finden mein Interesse am Schreiben zu steigern. ] Um Ihnen die Beantwortung zu erleichtern, können Sie die Antwort in Prozent geben                                  | ,076   | ,049  | -,112 | ,290  | ,208  | ,121  | -,099 | ,126  | ,291  | ,048  | ,287  | -,156 | -,007 | -,088 | ,046  | -,055 |
| [ Ich kann mir beim Schreiben vornehmen, gute Noten durch meine schriftlichen Arbeiten zu erzielen. ] Um Ihnen die Beantwortung zu erleichtern, können Sie die Antwort in Prozent geben     | ,370   | -,005 | ,014  | -,163 | ,093  | -,180 | -,019 | -,025 | 1,199 | -,286 | ,091  | ,241  | ,152  | -,224 | -,090 | -,059 |
| [ Ich kann mir beim Schreiben vornehmen, durch meine schriftlichen Arbeiten zu zeigen, wie gut ich bin. ] Um Ihnen die Beantwortung zu erleichtern, können Sie die Antwort in Prozent geben | ,274   | ,037  | ,065  | ,028  | ,152  | -,007 | -,027 | -,118 | ,862  | -,223 | -,045 | ,028  | ,104  | -,082 | ,065  | ,079  |
| [ Ich kann mir vornehmen, durch das Schreiben mein Wissen zu erweitern. ] Um Ihnen die Beantwortung zu erleichtern, können Sie die Antwort in Prozent geben                                 | -,030  | ,174  | -,154 | ,209  | ,167  | ,261  | -,074 | ,141  | ,313  | -,096 | -,108 | -,071 | ,039  | -,013 | -,230 | ,242  |
| [ Ich kann mir vornehmen, durch das Schreiben zu neuen Erkenntnissen zu gelangen. ] Um Ihnen die Beantwortung zu erleichtern, können Sie die Antwort in Prozent geben                       | -,068  | ,229  | -,067 | ,340  | ,096  | ,160  | ,065  | ,064  | ,417  | -,299 | -,053 | ,148  | ,200  | -,013 | -,192 | ,094  |

**Mustermatrix<sup>a</sup>**

|                                                                                                                                                                                                                          | Faktor |       |       |       |       |       |       |       |       |       |       |       |      |       |       |       |
|--------------------------------------------------------------------------------------------------------------------------------------------------------------------------------------------------------------------------|--------|-------|-------|-------|-------|-------|-------|-------|-------|-------|-------|-------|------|-------|-------|-------|
|                                                                                                                                                                                                                          | 1      | 2     | 3     | 4     | 5     | 6     | 7     | 8     | 9     | 10    | 11    | 12    | 13   | 14    | 15    | 16    |
| <input type="checkbox"/> Ich kann mein Vorgehen beim Schreiben überwachen. ] Um Ihnen die Beantwortung zu erleichtern, können Sie die Antwort in Prozent geben                                                           | ,173   | ,261  | ,059  | ,013  | -,189 | ,490  | ,000  | ,049  | ,072  | ,114  | ,078  | -,131 | ,192 | ,132  | ,003  | -,086 |
| <input type="checkbox"/> Ich kann mich beim Schreiben durch lautes Vorlesen von Textstellen unterstützen. ] Um Ihnen die Beantwortung zu erleichtern, können Sie die Antwort in Prozent geben                            | -,050  | ,205  | -,089 | ,072  | -,220 | ,003  | -,023 | ,164  | ,160  | ,358  | -,204 | ,202  | ,912 | -,027 | ,062  | -,061 |
| <input type="checkbox"/> Ich kann mich beim Schreiben durch innerliches Vorlesen von bereits geschriebenen Textstellen unterstützen. ] Um Ihnen die Beantwortung zu erleichtern, können Sie die Antwort in Prozent geben | -,051  | ,288  | ,135  | ,310  | ,256  | -,266 | ,163  | -,169 | -,054 | ,389  | -,164 | -,203 | ,302 | ,000  | -,015 | ,296  |
| <input type="checkbox"/> Ich kann mir die Dinge, die ich in meinem Text beschreibe, bildlich vorstellen. ] Um Ihnen die Beantwortung zu erleichtern, können Sie die Antwort in Prozent geben                             | ,326   | ,218  | -,014 | -,080 | ,142  | ,045  | -,158 | -,341 | ,046  | ,291  | -,358 | ,020  | ,093 | ,040  | ,041  | ,036  |
| <input type="checkbox"/> Ich kann zunächst einen Entwurf meines Textes anfertigen. ] Um Ihnen die Beantwortung zu erleichtern, können Sie die Antwort in Prozent geben                                                   | ,461   | -,198 | ,076  | -,074 | -,072 | ,178  | -,082 | -,008 | -,024 | ,615  | -,086 | -,321 | ,101 | -,293 | -,066 | -,013 |
| <input type="checkbox"/> Ich kann mir eine Gliederung erstellen, die mich beim Schreiben unterstützt. ] Um Ihnen die Beantwortung zu erleichtern, können Sie die Antwort in Prozent geben                                | ,790   | ,035  | ,000  | -,074 | ,055  | -,019 | -,027 | ,094  | ,049  | -,142 | -,091 | -,345 | ,050 | ,262  | ,029  | ,110  |
| <input type="checkbox"/> Ich kann mich auf das Schreiben konzentrieren. ] Um Ihnen die Beantwortung zu erleichtern, können Sie die Antwort in Prozent geben                                                              | ,174   | ,469  | -,104 | ,324  | -,100 | -,133 | ,026  | -,056 | ,046  | ,255  | ,107  | ,099  | ,278 | -,047 | ,099  | ,111  |

**Mustermatrix<sup>a</sup>**

|                                                                                                                                                                                                                 | Faktor |       |       |       |       |       |       |       |       |       |       |       |       |       |       |       |
|-----------------------------------------------------------------------------------------------------------------------------------------------------------------------------------------------------------------|--------|-------|-------|-------|-------|-------|-------|-------|-------|-------|-------|-------|-------|-------|-------|-------|
|                                                                                                                                                                                                                 | 1      | 2     | 3     | 4     | 5     | 6     | 7     | 8     | 9     | 10    | 11    | 12    | 13    | 14    | 15    | 16    |
| <input type="checkbox"/> Ich kann Ablenkungen beim Schreiben ausblenden. ] Um Ihnen die Beantwortung zu erleichtern, können Sie die Antwort in Prozent geben                                                    | -,193  | 1,032 | ,114  | -,184 | -,047 | ,076  | -,028 | ,068  | -,020 | -,126 | ,118  | -,118 | ,044  | ,197  | -,082 | ,043  |
| <input type="checkbox"/> Ich kann mich auf das Schreiben konzentrieren, auch wenn um mich herum viel passiert. ] Um Ihnen die Beantwortung zu erleichtern, können Sie die Antwort in Prozent geben              | -,259  | ,953  | ,082  | -,132 | -,112 | ,215  | ,061  | -,204 | ,059  | ,096  | -,029 | -,035 | ,304  | ,122  | ,011  | -,072 |
| <input type="checkbox"/> Ich kann mich auch auf das Schreiben konzentrieren, wenn ich andere Dinge im Kopf habe. ] Um Ihnen die Beantwortung zu erleichtern, können Sie die Antwort in Prozent geben            | -,069  | ,963  | ,048  | -,231 | -,095 | ,196  | -,026 | ,031  | ,072  | -,120 | ,200  | ,074  | -,069 | -,118 | -,091 | -,152 |
| <input type="checkbox"/> Ich kann mich wieder auf das Schreiben konzentrieren, wenn ich kurz an etwas anderes gedacht habe. ] Um Ihnen die Beantwortung zu erleichtern, können Sie die Antwort in Prozent geben | ,185   | ,638  | -,228 | ,088  | -,084 | -,111 | ,116  | ,184  | -,024 | ,067  | ,085  | -,071 | ,134  | ,012  | -,054 | ,242  |
| <input type="checkbox"/> Ich kann mich wieder auf das Schreiben konzentrieren, wenn ich kurz ablenkt war. ] Um Ihnen die Beantwortung zu erleichtern, können Sie die Antwort in Prozent geben                   | ,026   | ,762  | -,077 | -,031 | ,012  | -,212 | ,015  | ,169  | ,008  | ,152  | ,142  | -,077 | ,154  | ,001  | ,084  | ,053  |
| <input type="checkbox"/> Ich kann mich an meine festen Schreibzeiten halten. ] Um Ihnen die Beantwortung zu erleichtern, können Sie die Antwort in Prozent geben                                                | ,313   | ,201  | ,080  | -,048 | ,043  | ,359  | -,017 | ,007  | -,041 | -,094 | ,033  | ,164  | ,313  | -,270 | ,083  | -,037 |
| <input type="checkbox"/> Ich kann mir feste Schreibzeiten einplanen. ] Um Ihnen die Beantwortung zu erleichtern, können Sie die Antwort in Prozent geben                                                        | ,152   | -,148 | -,011 | -,064 | ,206  | ,501  | -,100 | ,118  | -,041 | -,027 | -,028 | ,115  | ,340  | -,065 | ,127  | ,068  |
| <input type="checkbox"/> Ich kann meine Schreibzeit effektiv nutzen. ] Um Ihnen die Beantwortung zu erleichtern, können Sie die Antwort in Prozent geben                                                        | ,496   | ,147  | ,019  | -,035 | -,061 | -,024 | -,044 | ,137  | -,195 | ,165  | ,080  | ,075  | -,093 | -,036 | -,099 | ,183  |

**Mustermatrix<sup>a</sup>**

|                                                                                                                                                                                                            | Faktor |       |       |       |       |       |       |       |       |       |       |       |       |       |       |       |
|------------------------------------------------------------------------------------------------------------------------------------------------------------------------------------------------------------|--------|-------|-------|-------|-------|-------|-------|-------|-------|-------|-------|-------|-------|-------|-------|-------|
|                                                                                                                                                                                                            | 1      | 2     | 3     | 4     | 5     | 6     | 7     | 8     | 9     | 10    | 11    | 12    | 13    | 14    | 15    | 16    |
| <input type="checkbox"/> Ich kann meine Texte bis zur Abgabefrist fertigstellen. ] Um Ihnen die Beantwortung zu erleichtern, können Sie die Antwort in Prozent geben                                       | ,018   | -,014 | -,003 | -,051 | -,073 | -,258 | ,196  | ,054  | ,113  | -,146 | ,099  | ,813  | -,065 | ,058  | ,161  | ,078  |
| <input type="checkbox"/> Ich kann mir meine Zeit so einteilen, dass ich konzentriert an meinem Text arbeite. ] Um Ihnen die Beantwortung zu erleichtern, können Sie die Antwort in Prozent geben           | ,469   | ,196  | -,103 | -,159 | ,072  | ,025  | -,016 | ,272  | -,007 | ,024  | ,045  | ,044  | -,164 | -,076 | -,062 | ,158  |
| <input type="checkbox"/> Ich kann, auch wenn viel zu tun ist, Zeit finden, um konzentriert an meinem Text zu arbeiten. ] Um Ihnen die Beantwortung zu erleichtern, können Sie die Antwort in Prozent geben | ,166   | ,340  | ,077  | -,271 | ,076  | ,209  | -,032 | ,212  | ,026  | -,299 | ,022  | -,176 | -,306 | -,048 | ,277  | ,190  |
| <input type="checkbox"/> Ich kann mir meinen Schreibplatz so gestalten, dass ich ungestört schreiben kann. ] Um Ihnen die Beantwortung zu erleichtern, können Sie die Antwort in Prozent geben             | ,006   | ,147  | ,060  | ,165  | -,002 | -,059 | ,034  | ,997  | -,004 | -,326 | -,104 | ,057  | ,237  | ,111  | -,095 | -,075 |
| <input type="checkbox"/> Ich kann mir einen geeigneten Platz zum Schreiben auswählen. ] Um Ihnen die Beantwortung zu erleichtern, können Sie die Antwort in Prozent geben                                  | -,069  | -,025 | ,095  | ,048  | -,110 | -,140 | ,203  | 1,015 | -,101 | -,175 | ,038  | ,021  | ,107  | ,125  | ,101  | ,044  |
| <input type="checkbox"/> Ich kann mich durch Belohnungen zum Weiterschreiben motivieren. ] Um Ihnen die Beantwortung zu erleichtern, können Sie die Antwort in Prozent geben                               | -,070  | -,110 | ,038  | ,020  | ,993  | ,111  | ,119  | -,092 | ,103  | ,094  | ,020  | -,010 | -,263 | ,013  | -,026 | -,062 |
| <input type="checkbox"/> Ich kann mich beim Schreiben selbst belohnen, indem ich mein Vorankommen protokolliere. ] Um Ihnen die Beantwortung zu erleichtern, können Sie die Antwort in Prozent geben       | -,024  | ,114  | ,070  | ,024  | ,182  | ,753  | ,086  | ,133  | -,150 | -,221 | ,062  | -,228 | -,014 | -,219 | -,110 | -,082 |



**Mustermatrix<sup>a</sup>**

|                                                                                                                                                                                          | Faktor |       |       |       |       |       |       |       |       |       |       |       |       |        |       |       |
|------------------------------------------------------------------------------------------------------------------------------------------------------------------------------------------|--------|-------|-------|-------|-------|-------|-------|-------|-------|-------|-------|-------|-------|--------|-------|-------|
|                                                                                                                                                                                          | 1      | 2     | 3     | 4     | 5     | 6     | 7     | 8     | 9     | 10    | 11    | 12    | 13    | 14     | 15    | 16    |
| [ Ich kann mich beim Schreiben belohnen, indem ich mir bei gutem Vorankommen einen freien Tag gönne. ] Um Ihnen die Beantwortung zu erleichtern, können Sie die Antwort in Prozent geben | -,146  | -,010 | -,014 | ,045  | ,289  | -,112 | -,065 | ,068  | ,109  | ,474  | ,225  | -,191 | ,061  | -,095  | ,038  | ,139  |
| [ Ich kann mich beim Schreiben belohnen, indem ich mir schöne Dinge für gutes Vorankommen gönne. ] Um Ihnen die Beantwortung zu erleichtern, können Sie die Antwort in Prozent geben     | ,026   | -,108 | -,043 | ,016  | ,980  | -,099 | ,093  | -,069 | ,123  | -,058 | ,025  | ,005  | -,217 | ,210   | ,133  | -,012 |
| [ Ich kann mir gezieltes Feedback zu meinen Text einholen. ] Um Ihnen die Beantwortung zu erleichtern, können Sie die Antwort in Prozent geben                                           | -,184  | ,010  | ,004  | -,094 | -,021 | ,177  | ,868  | ,259  | ,079  | ,072  | ,056  | ,098  | -,019 | -,241  | ,295  | -,054 |
| [ Ich kann mir zu der Rohfassung meines Textes kritisches Feedback einholen. ] Um Ihnen die Beantwortung zu erleichtern, können Sie die Antwort in Prozent geben                         | ,050   | ,064  | ,086  | ,026  | ,039  | -,050 | ,868  | -,036 | -,082 | ,233  | -,014 | ,071  | ,069  | -,266  | ,120  | ,014  |
| [ Ich kann das Feedback Anderer zu meinen Texten umsetzen. ] Um Ihnen die Beantwortung zu erleichtern, können Sie die Antwort in Prozent geben                                           | ,172   | -,061 | -,032 | -,091 | ,277  | ,042  | ,727  | ,197  | -,064 | -,011 | -,213 | ,020  | -,192 | -,116  | ,116  | ,069  |
| [ Ich kann mich daran orientieren, welche Strategien KommilitonInnen beim Schreiben einsetzen.] Um Ihnen die Beantwortung zu erleichtern, können Sie die Antwort in Prozent geben        | -,058  | -,135 | ,051  | ,087  | -,182 | ,485  | ,358  | -,166 | ,309  | ,200  | ,128  | -,036 | -,002 | -,1007 | -,127 | ,124  |
| [ Ich kann mich beim Schreiben selbst beobachten. ] Um Ihnen die Beantwortung zu erleichtern, können Sie die Antwort in Prozent geben                                                    | ,029   | ,255  | -,210 | -,129 | ,014  | ,800  | ,134  | -,230 | ,018  | -,064 | ,005  | -,071 | -,079 | -,075  | ,080  | -,068 |

**Mustermatrix<sup>a</sup>**

|                                                                                                                                                                                               | Faktor |       |       |       |       |       |       |       |       |       |       |       |       |       |       |       |
|-----------------------------------------------------------------------------------------------------------------------------------------------------------------------------------------------|--------|-------|-------|-------|-------|-------|-------|-------|-------|-------|-------|-------|-------|-------|-------|-------|
|                                                                                                                                                                                               | 1      | 2     | 3     | 4     | 5     | 6     | 7     | 8     | 9     | 10    | 11    | 12    | 13    | 14    | 15    | 16    |
| [ Ich kann mein Vorgehen beim Schreiben ändern, wenn ich merke, dass es nicht erfolgreich ist. ] Um Ihnen die Beantwortung zu erleichtern, können Sie die Antwort in Prozent geben            | ,234   | ,033  | ,150  | -,071 | -,036 | -,036 | -,002 | ,049  | -,032 | ,613  | -,072 | ,175  | ,177  | -,009 | -,129 | ,057  |
| [ Ich kann meinen Zeitplan für das Schreiben anpassen, wenn ich merke, dass ich ihn nicht einhalten kann. ] Um Ihnen die Beantwortung zu erleichtern, können Sie die Antwort in Prozent geben | -,037  | -,068 | -,058 | ,089  | ,113  | ,128  | ,304  | ,030  | -,091 | -,050 | -,138 | ,098  | ,149  | ,159  | ,722  | ,032  |
| [ Ich kann mein Vorankommen beim Schreiben nachvollziehen. ] Um Ihnen die Beantwortung zu erleichtern, können Sie die Antwort in Prozent geben                                                | ,139   | -,107 | ,087  | ,193  | -,021 | ,076  | ,066  | ,185  | -,172 | ,303  | -,066 | ,151  | ,037  | ,193  | ,055  | ,013  |
| [ Ich kann mein Vorankommen beim Schreiben durch die Anzahl der geschriebenen Stunden nachvollziehen. ] Um Ihnen die Beantwortung zu erleichtern, können Sie die Antwort in Prozent geben     | -,238  | -,050 | -,089 | ,294  | -,150 | ,894  | -,097 | -,124 | -,127 | -,019 | -,056 | ,014  | ,012  | -,288 | ,168  | ,108  |
| [ Ich kann mein Vorankommen beim Schreiben durch die Anzahl der geschriebenen Seiten nachvollziehen. ] Um Ihnen die Beantwortung zu erleichtern, können Sie die Antwort in Prozent geben      | -,119  | -,053 | ,020  | ,072  | ,118  | ,090  | ,062  | -,053 | -,037 | ,478  | -,007 | ,389  | -,012 | -,060 | -,226 | ,051  |
| [ Ich kann ausdauernd an meinem Text arbeiten. ] Um Ihnen die Beantwortung zu erleichtern, können Sie die Antwort in Prozent geben                                                            | -,040  | ,418  | ,054  | ,317  | ,133  | ,222  | -,110 | ,003  | -,261 | -,037 | -,099 | ,046  | -,136 | ,090  | ,154  | -,092 |
| [ Ich kann mehrere Ideen in einem Text zusammen führen. ] Um Ihnen die Beantwortung zu erleichtern, können Sie die Antwort in Prozent geben                                                   | ,351   | ,057  | -,050 | -,120 | -,180 | ,108  | ,069  | ,082  | ,159  | ,058  | ,023  | -,001 | -,194 | ,309  | -,013 | ,141  |

**Mustermatrix<sup>a</sup>**

|                                                                                                                                                                                   | Faktor |       |       |       |       |       |       |       |       |       |       |       |       |       |       |       |
|-----------------------------------------------------------------------------------------------------------------------------------------------------------------------------------|--------|-------|-------|-------|-------|-------|-------|-------|-------|-------|-------|-------|-------|-------|-------|-------|
|                                                                                                                                                                                   | 1      | 2     | 3     | 4     | 5     | 6     | 7     | 8     | 9     | 10    | 11    | 12    | 13    | 14    | 15    | 16    |
| [ Ich kann eine Schreiblockade lösen und danach weiterschreiben. ]<br>Um Ihnen die Beantwortung zu erleichtern, können Sie die Antwort in Prozent geben                           | ,023   | ,252  | ,248  | -,010 | ,129  | ,006  | ,050  | ,103  | -,046 | ,315  | ,109  | ,130  | ,022  | -,020 | -,055 | -,316 |
| [ Ich kann mich lange Zeit auf das Schreiben konzentrieren, wenn es nötig ist. ]<br>Um Ihnen die Beantwortung zu erleichtern, können Sie die Antwort in Prozent geben             | ,221   | ,239  | -,197 | ,309  | ,024  | -,070 | -,026 | ,404  | -,050 | -,003 | -,212 | ,119  | ,130  | ,043  | ,141  | -,204 |
| [ Ich kann die Qualität meines Textes realistisch einschätzen. ]<br>Um Ihnen die Beantwortung zu erleichtern, können Sie die Antwort in Prozent geben                             | ,649   | -,204 | ,032  | ,109  | -,138 | ,058  | -,005 | -,031 | ,141  | -,024 | -,223 | ,025  | -,202 | -,053 | -,068 | ,100  |
| [ Ich kann die Anforderungen, die an meinen Text gestellt werden, erfüllen. ]<br>Um Ihnen die Beantwortung zu erleichtern, können Sie die Antwort in Prozent geben                | ,177   | ,068  | ,133  | ,041  | -,004 | -,045 | ,050  | -,066 | ,236  | -,112 | -,011 | ,073  | -,108 | ,388  | ,337  | ,012  |
| [ Ich kann die von mir selbst gesetzten Kriterien für die Qualität meiner Texte erreichen. ]<br>Um Ihnen die Beantwortung zu erleichtern, können Sie die Antwort in Prozent geben | ,297   | ,111  | ,030  | ,263  | ,104  | -,049 | ,098  | -,058 | ,065  | ,458  | -,013 | -,114 | -,022 | -,009 | ,008  | -,184 |
| [ Ich kann die von mir selbst gesetzten Teilziele beim Schreiben erreichen. ]<br>Um Ihnen die Beantwortung zu erleichtern, können Sie die Antwort in Prozent geben                | ,199   | ,160  | ,137  | -,061 | ,165  | ,080  | -,082 | ,013  | -,203 | ,281  | ,123  | -,015 | -,117 | ,089  | ,032  | ,110  |
| [ Ich kann von mir selbst zu hoch gesetzte Ansprüche heruntersetzen. ]<br>Um Ihnen die Beantwortung zu erleichtern, können Sie die Antwort in Prozent geben                       | ,076   | ,039  | -,085 | -,254 | ,011  | -,133 | ,125  | -,234 | -,289 | 1,195 | -,053 | ,055  | ,304  | -,071 | -,027 | ,039  |

**Mustermatrix<sup>a</sup>**

|                                                                                                                                                                      | Faktor |       |       |       |       |       |       |       |       |       |       |       |       |       |       |      |
|----------------------------------------------------------------------------------------------------------------------------------------------------------------------|--------|-------|-------|-------|-------|-------|-------|-------|-------|-------|-------|-------|-------|-------|-------|------|
|                                                                                                                                                                      | 1      | 2     | 3     | 4     | 5     | 6     | 7     | 8     | 9     | 10    | 11    | 12    | 13    | 14    | 15    | 16   |
| [ Ich kann meine Texte durch Überarbeitung besser machen. ]<br>Um Ihnen die Beantwortung zu erleichtern, können Sie die Antwort in Prozent geben                     | -,150  | ,070  | ,944  | -,024 | -,083 | -,195 | ,023  | ,216  | ,038  | -,046 | -,030 | ,095  | ,074  | -,043 | -,061 | ,112 |
| [ Ich kann meine Texte durch Überarbeitung verständlicher machen. ] Um Ihnen die Beantwortung zu erleichtern, können Sie die Antwort in Prozent geben                | ,045   | -,054 | ,932  | -,103 | ,132  | -,017 | ,065  | ,023  | -,047 | -,082 | -,084 | -,131 | -,246 | -,065 | -,041 | ,124 |
| [ Ich kann mit der Qualität meiner Texte zufrieden sein. ] Um Ihnen die Beantwortung zu erleichtern, können Sie die Antwort in Prozent geben                         | ,208   | ,075  | ,086  | -,117 | -,022 | -,048 | -,037 | -,063 | ,119  | ,567  | -,051 | -,080 | -,024 | ,173  | ,109  | ,009 |
| [ Ich kann ein gutes Gefühl für das Vorankommen beim Schreiben entwickeln. ] Um Ihnen die Beantwortung zu erleichtern, können Sie die Antwort in Prozent geben       | ,089   | -,061 | ,021  | ,123  | ,121  | ,181  | ,000  | ,114  | -,031 | ,258  | ,121  | ,038  | -,045 | ,192  | -,024 | ,169 |
| [ Ich kann die Zeit, die mir zum Schreiben zur Verfügung steht, gut einschätzen. ] Um Ihnen die Beantwortung zu erleichtern, können Sie die Antwort in Prozent geben | ,237   | ,038  | ,097  | ,006  | ,079  | ,125  | ,000  | -,219 | -,219 | -,038 | ,212  | ,289  | -,386 | ,021  | -,057 | ,459 |
| [ Ich kann vermeiden, dass ich einen Fehler beim nächsten Mal wieder mache. ] Um Ihnen die Beantwortung zu erleichtern, können Sie die Antwort in Prozent geben      | ,163   | ,018  | ,318  | ,199  | -,199 | -,066 | -,167 | ,206  | ,089  | -,022 | -,068 | ,128  | ,116  | -,017 | -,132 | ,269 |
| [ Ich kann aus misslungenen Schreibverfahren lernen. ] Um Ihnen die Beantwortung zu erleichtern, können Sie die Antwort in Prozent geben                             | -,135  | -,256 | -,005 | ,097  | -,029 | ,138  | ,015  | ,187  | ,015  | ,339  | -,036 | -,026 | ,010  | -,133 | ,268  | ,457 |
| [ Ich kann mein Vorgehen bei Schreibprojekten durch Erfahrung verbessern. ] Um Ihnen die Beantwortung zu erleichtern, können Sie die Antwort in Prozent geben        | ,136   | -,065 | ,240  | ,024  | ,046  | -,151 | -,012 | ,284  | ,159  | -,061 | -,020 | -,027 | -,093 | ,012  | -,033 | ,413 |
| [ Ich kann einschätzen, was ich beim nächsten Mal anders machen muss. ] Um Ihnen die Beantwortung zu erleichtern, können Sie die Antwort in Prozent geben            | ,011   | ,153  | ,212  | -,108 | -,205 | ,002  | ,017  | ,073  | ,105  | ,344  | -,094 | -,082 | ,091  | -,251 | ,087  | ,454 |

Extraktionsmethode: Hauptachsenfaktorenanalyse.  
 Rotationsmethode: Promax mit Kaiser-Normalisierung.<sup>a</sup>  
 a. Die Rotation ist in 61 Iterationen konvergiert.

**Strukturmatrix**

|                                                                                                                                                                                                                 | Faktor |      |      |      |       |      |       |      |      |      |       |      |       |      |      |      |
|-----------------------------------------------------------------------------------------------------------------------------------------------------------------------------------------------------------------|--------|------|------|------|-------|------|-------|------|------|------|-------|------|-------|------|------|------|
|                                                                                                                                                                                                                 | 1      | 2    | 3    | 4    | 5     | 6    | 7     | 8    | 9    | 10   | 11    | 12   | 13    | 14   | 15   | 16   |
| [ Ich kann die Anforderungen unterschiedlicher Textsorten (wie z. B. Hausarbeit, Protokoll, Critical Paper, usw.) verstehen.] Um Ihnen die Beantwortung zu erleichtern, können Sie die Antwort in Prozent geben | ,396   | ,324 | ,438 | ,320 | -,031 | ,255 | ,105  | ,140 | ,369 | ,224 | -,136 | ,162 | -,130 | ,201 | ,291 | ,162 |
| [ Ich kann mir konkrete Schreibziele setzen. ] Um Ihnen die Beantwortung zu erleichtern, können Sie die Antwort in Prozent geben                                                                                | ,690   | ,280 | ,454 | ,329 | ,437  | ,523 | ,119  | ,401 | ,106 | ,341 | ,423  | ,389 | ,093  | ,118 | ,316 | ,448 |
| [ Ich kann mein Schreibprojekt in kleinere Schreibziele unterteilen. ] Um Ihnen die Beantwortung zu erleichtern, können Sie die Antwort in Prozent geben                                                        | ,654   | ,216 | ,472 | ,259 | ,302  | ,497 | ,033  | ,486 | ,229 | ,438 | ,442  | ,290 | ,031  | ,261 | ,388 | ,336 |
| [ Ich kann meine Ideen für meinen Text vor dem Schreiben strukturieren. ] Um Ihnen die Beantwortung zu erleichtern, können Sie die Antwort in Prozent geben                                                     | ,723   | ,311 | ,328 | ,348 | ,160  | ,256 | -,029 | ,337 | ,363 | ,391 | ,083  | ,324 | -,242 | ,108 | ,399 | ,310 |
| [ Ich kann mir das Schreiben in sinnvolle Arbeitsschritte unterteilen. ] Um Ihnen die Beantwortung zu erleichtern, können Sie die Antwort in Prozent geben                                                      | ,832   | ,346 | ,556 | ,399 | ,341  | ,428 | ,125  | ,536 | ,310 | ,544 | ,252  | ,324 | -,183 | ,245 | ,307 | ,305 |
| [ Ich kann meine Ideen auch bei einem komplexen Thema gut organisieren. ] Um Ihnen die Beantwortung zu erleichtern, können Sie die Antwort in Prozent geben                                                     | ,746   | ,452 | ,460 | ,475 | ,194  | ,359 | ,059  | ,394 | ,472 | ,495 | -,052 | ,370 | -,396 | ,199 | ,244 | ,099 |

Strukturmatrix

|                                                                                                                                                                                                     | Faktor |      |      |      |      |      |       |      |      |      |      |      |       |       |      |      |
|-----------------------------------------------------------------------------------------------------------------------------------------------------------------------------------------------------|--------|------|------|------|------|------|-------|------|------|------|------|------|-------|-------|------|------|
|                                                                                                                                                                                                     | 1      | 2    | 3    | 4    | 5    | 6    | 7     | 8    | 9    | 10   | 11   | 12   | 13    | 14    | 15   | 16   |
| [ Ich kann mich dazu motivieren mit dem Schreiben anzufangen. ]<br>Um Ihnen die Beantwortung zu erleichtern, können Sie die Antwort in Prozent geben                                                | ,352   | ,492 | ,190 | ,412 | ,365 | ,289 | -,034 | ,396 | ,205 | ,360 | ,499 | ,340 | -,168 | ,057  | ,257 | ,392 |
| [ Ich kann mich erst auf den letzten Drücker zum Schreiben motivieren. ] Um Ihnen die Beantwortung zu erleichtern, können Sie die Antwort in Prozent geben                                          | ,297   | ,259 | ,134 | ,233 | ,296 | ,259 | -,068 | ,276 | ,050 | ,186 | ,710 | ,230 | -,060 | ,009  | ,165 | ,131 |
| [ Ich kann Probleme, die beim Schreiben auftauchen, überwinden. ] Um Ihnen die Beantwortung zu erleichtern, können Sie die Antwort in Prozent geben                                                 | ,545   | ,511 | ,729 | ,608 | ,078 | ,400 | ,008  | ,381 | ,473 | ,612 | ,080 | ,425 | -,444 | ,321  | ,406 | ,148 |
| [ Ich kann mich durch das Vorstellen negativer Konsequenzen des Nichtschreibens zum Weiterschreiben motivieren. ] Um Ihnen die Beantwortung zu erleichtern, können Sie die Antwort in Prozent geben | ,099   | ,075 | ,095 | ,122 | ,253 | ,280 | -,062 | ,187 | ,111 | ,105 | ,086 | ,487 | ,095  | -,008 | ,073 | ,109 |
| [ Ich kann mich durch das Vorstellen positiver Konsequenzen zum Weiterschreiben motivieren. ] Um Ihnen die Beantwortung zu erleichtern, können Sie die Antwort in Prozent geben                     | ,371   | ,388 | ,317 | ,370 | ,571 | ,515 | -,293 | ,511 | ,366 | ,390 | ,091 | ,468 | -,053 | -,021 | ,322 | ,414 |
| [ Ich kann Freude am Schreiben entwickeln. ] Um Ihnen die Beantwortung zu erleichtern, können Sie die Antwort in Prozent geben                                                                      | ,342   | ,425 | ,238 | ,812 | ,299 | ,285 | -,047 | ,455 | ,366 | ,421 | ,132 | ,281 | -,154 | ,069  | ,140 | ,353 |
| [ Ich kann Interesse für das Schreiben entwickeln. ] Um Ihnen die Beantwortung zu erleichtern, können Sie die Antwort in Prozent geben                                                              | ,429   | ,475 | ,373 | ,816 | ,286 | ,465 | -,089 | ,459 | ,389 | ,485 | ,027 | ,433 | -,246 | ,152  | ,243 | ,302 |

Strukturmatrix

|                                                                                                                                                                                            | Faktor |      |      |      |      |      |       |      |      |      |       |      |       |      |       |      |
|--------------------------------------------------------------------------------------------------------------------------------------------------------------------------------------------|--------|------|------|------|------|------|-------|------|------|------|-------|------|-------|------|-------|------|
|                                                                                                                                                                                            | 1      | 2    | 3    | 4    | 5    | 6    | 7     | 8    | 9    | 10   | 11    | 12   | 13    | 14   | 15    | 16   |
| [ Ich kann leicht Wege finden mein Interesse am Schreiben zu steigern. ] Um Ihnen die Beantwortung zu erleichtern, können Sie die Antwort in Prozent geben                                 | ,476   | ,482 | ,294 | ,561 | ,435 | ,478 | -,175 | ,553 | ,465 | ,503 | ,277  | ,300 | -,162 | ,070 | ,314  | ,338 |
| [ Ich kann mir beim Schreiben vornehmen, gute Noten durch meine schriftlichen Arbeiten zu erzielen. ] Um Ihnen die Beantwortung zu erleichtern, können Sie die Antwort in Prozent geben    | ,448   | ,380 | ,286 | ,416 | ,195 | ,321 | -,085 | ,317 | ,803 | ,340 | -,023 | ,286 | -,152 | ,150 | ,222  | ,223 |
| [ Ich kann mir beim Schreiben vornehmen, durch meine schriftlichen Arbeiten zu zeigen, wie gut ich bin.] Um Ihnen die Beantwortung zu erleichtern, können Sie die Antwort in Prozent geben | ,525   | ,491 | ,428 | ,548 | ,234 | ,459 | -,069 | ,394 | ,795 | ,479 | -,077 | ,308 | -,211 | ,235 | ,312  | ,368 |
| [ Ich kann mir vornehmen, durch das Schreiben mein Wissen zu erweitern. ] Um Ihnen die Beantwortung zu erleichtern, können Sie die Antwort in Prozent geben                                | ,375   | ,556 | ,225 | ,601 | ,393 | ,538 | -,100 | ,524 | ,530 | ,460 | -,111 | ,335 | -,163 | ,134 | -,010 | ,533 |
| [ Ich kann mir vornehmen, durch das Schreiben zu neuen Erkenntnissen zu gelangen. ] Um Ihnen die Beantwortung zu erleichtern, können Sie die Antwort in Prozent geben                      | ,294   | ,504 | ,208 | ,580 | ,305 | ,440 | ,037  | ,377 | ,518 | ,332 | -,090 | ,345 | -,086 | ,166 | -,044 | ,384 |
| [ Ich kann mein Vorgehen beim Schreiben überwachen. ] Um Ihnen die Beantwortung zu erleichtern, können Sie die Antwort in Prozent geben                                                    | ,530   | ,508 | ,574 | ,494 | ,074 | ,725 | ,056  | ,483 | ,535 | ,607 | ,130  | ,308 | -,213 | ,438 | ,285  | ,319 |
| [ Ich kann mich beim Schreiben durch lautes Vorlesen von Textstellen unterstützen. ] Um Ihnen die Beantwortung zu erleichtern, können Sie die Antwort in Prozent geben                     | ,130   | ,228 | ,133 | ,235 | ,099 | ,228 | -,050 | ,224 | ,245 | ,188 | -,045 | ,082 | ,258  | ,030 | ,077  | ,209 |

Strukturmatrix

|                                                                                                                                                                                                   | Faktor |      |      |      |       |      |       |      |      |      |       |      |       |       |      |      |
|---------------------------------------------------------------------------------------------------------------------------------------------------------------------------------------------------|--------|------|------|------|-------|------|-------|------|------|------|-------|------|-------|-------|------|------|
|                                                                                                                                                                                                   | 1      | 2    | 3    | 4    | 5     | 6    | 7     | 8    | 9    | 10   | 11    | 12   | 13    | 14    | 15   | 16   |
| [ Ich kann mich beim Schreiben durch innerliches Vorlesen von bereits geschriebenen Textstellen unterstützen. ] Um Ihnen die Beantwortung zu erleichtern, können Sie die Antwort in Prozent geben | ,340   | ,472 | ,329 | ,499 | ,377  | ,183 | ,169  | ,307 | ,256 | ,403 | -,076 | ,113 | ,015  | ,069  | ,043 | ,503 |
| [ Ich kann mir die Dinge, die ich in meinem Text beschreibe, bildlich vorstellen. ] Um Ihnen die Beantwortung zu erleichtern, können Sie die Antwort in Prozent geben                             | ,443   | ,458 | ,325 | ,389 | ,185  | ,307 | -,165 | ,237 | ,333 | ,423 | -,324 | ,324 | -,286 | ,071  | ,209 | ,218 |
| [ Ich kann zunächst einen Entwurf meines Textes anfertigen. ] Um Ihnen die Beantwortung zu erleichtern, können Sie die Antwort in Prozent geben                                                   | ,489   | ,219 | ,402 | ,259 | ,171  | ,369 | -,098 | ,364 | ,225 | ,478 | -,004 | ,106 | -,130 | -,019 | ,238 | ,245 |
| [ Ich kann mir eine Gliederung erstellen, die mich beim Schreiben unterstützt. ] Um Ihnen die Beantwortung zu erleichtern, können Sie die Antwort in Prozent geben                                | ,662   | ,316 | ,408 | ,270 | ,220  | ,318 | ,064  | ,381 | ,295 | ,337 | ,082  | ,090 | -,063 | ,272  | ,235 | ,384 |
| [ Ich kann mich auf das Schreiben konzentrieren. ] Um Ihnen die Beantwortung zu erleichtern, können Sie die Antwort in Prozent geben                                                              | ,641   | ,790 | ,436 | ,747 | ,313  | ,451 | -,024 | ,602 | ,477 | ,656 | ,068  | ,505 | -,291 | ,118  | ,404 | ,504 |
| [ Ich kann Ablenkungen beim Schreiben ausblenden. ] Um Ihnen die Beantwortung zu erleichtern, können Sie die Antwort in Prozent geben                                                             | ,294   | ,727 | ,322 | ,392 | ,130  | ,360 | -,007 | ,372 | ,329 | ,367 | ,043  | ,227 | -,202 | ,226  | ,134 | ,309 |
| [ Ich kann mich auf das Schreiben konzentrieren, auch wenn um mich herum viel passiert. ] Um Ihnen die Beantwortung zu erleichtern, können Sie die Antwort in Prozent geben                       | ,155   | ,604 | ,296 | ,341 | -,011 | ,355 | ,066  | ,161 | ,368 | ,321 | -,078 | ,155 | -,111 | ,250  | ,097 | ,158 |



Strukturmatrix

|                                                                                                                                                                                          | Faktor |      |      |      |      |      |       |      |      |      |      |      |       |       |      |      |
|------------------------------------------------------------------------------------------------------------------------------------------------------------------------------------------|--------|------|------|------|------|------|-------|------|------|------|------|------|-------|-------|------|------|
|                                                                                                                                                                                          | 1      | 2    | 3    | 4    | 5    | 6    | 7     | 8    | 9    | 10   | 11   | 12   | 13    | 14    | 15   | 16   |
| [ Ich kann mich auch auf das Schreiben konzentrieren, wenn ich andere Dinge im Kopf habe. ] Um Ihnen die Beantwortung zu erleichtern, können Sie die Antwort in Prozent geben            | ,381   | ,771 | ,297 | ,414 | ,181 | ,418 | -,113 | ,425 | ,309 | ,400 | ,041 | ,423 | -,341 | ,012  | ,248 | ,183 |
| [ Ich kann mich wieder auf das Schreiben konzentrieren, wenn ich kurz an etwas anderes gedacht habe. ] Um Ihnen die Beantwortung zu erleichtern, können Sie die Antwort in Prozent geben | ,532   | ,733 | ,241 | ,552 | ,319 | ,336 | ,074  | ,581 | ,316 | ,470 | ,071 | ,342 | -,193 | ,068  | ,204 | ,565 |
| [ Ich kann mich wieder auf das Schreiben konzentrieren, wenn ich kurz ablenkt war. ] Um Ihnen die Beantwortung zu erleichtern, können Sie die Antwort in Prozent geben                   | ,477   | ,746 | ,282 | ,496 | ,320 | ,273 | -,062 | ,551 | ,304 | ,469 | ,116 | ,314 | -,208 | ,007  | ,342 | ,404 |
| [ Ich kann mich an meine festen Schreibzeiten halten. ] Um Ihnen die Beantwortung zu erleichtern, können Sie die Antwort in Prozent geben                                                | ,559   | ,416 | ,343 | ,278 | ,485 | ,505 | -,125 | ,441 | ,077 | ,264 | ,193 | ,406 | ,066  | -,212 | ,319 | ,353 |
| [ Ich kann mir feste Schreibzeiten einplanen. ] Um Ihnen die Beantwortung zu erleichtern, können Sie die Antwort in Prozent geben                                                        | ,437   | ,195 | ,277 | ,187 | ,532 | ,574 | -,162 | ,439 | ,076 | ,229 | ,254 | ,313 | ,192  | -,098 | ,247 | ,412 |
| [ Ich kann meine Schreibzeit effektiv nutzen. ] Um Ihnen die Beantwortung zu erleichtern, können Sie die Antwort in Prozent geben                                                        | ,764   | ,593 | ,487 | ,508 | ,355 | ,476 | -,034 | ,658 | ,225 | ,599 | ,096 | ,547 | -,365 | ,068  | ,339 | ,520 |
| [ Ich kann meine Texte bis zur Abgabefrist fertigstellen. ] Um Ihnen die Beantwortung zu erleichtern, können Sie die Antwort in Prozent geben                                            | ,383   | ,340 | ,272 | ,344 | ,086 | ,224 | ,154  | ,362 | ,207 | ,342 | ,010 | ,711 | -,430 | ,133  | ,356 | ,210 |
| [ Ich kann mir meine Zeit so einteilen, dass ich konzentriert an meinem Text arbeite. ] Um Ihnen die Beantwortung zu erleichtern, können Sie die Antwort in Prozent geben                | ,771   | ,646 | ,404 | ,505 | ,457 | ,501 | -,076 | ,739 | ,292 | ,580 | ,075 | ,564 | -,377 | -,004 | ,366 | ,542 |

Strukturmatrix

|                                                                                                                                                                                          | Faktor |      |      |      |      |      |       |      |       |      |      |      |       |       |       |      |
|------------------------------------------------------------------------------------------------------------------------------------------------------------------------------------------|--------|------|------|------|------|------|-------|------|-------|------|------|------|-------|-------|-------|------|
|                                                                                                                                                                                          | 1      | 2    | 3    | 4    | 5    | 6    | 7     | 8    | 9     | 10   | 11   | 12   | 13    | 14    | 15    | 16   |
| [ Ich kann, auch wenn viel zu tun ist, Zeit finden, um konzentriert an meinem Text zu arbeiten. ] Um Ihnen die Beantwortung zu erleichtern, können Sie die Antwort in Prozent geben      | ,571   | ,562 | ,402 | ,313 | ,274 | ,451 | -,131 | ,579 | ,274  | ,425 | ,074 | ,370 | -,339 | -,012 | ,537  | ,437 |
| [ Ich kann mir meinen Schreibplatz so gestalten, dass ich ungestört schreiben kann. ] Um Ihnen die Beantwortung zu erleichtern, können Sie die Antwort in Prozent geben                  | ,493   | ,532 | ,335 | ,521 | ,392 | ,422 | -,021 | ,820 | ,290  | ,430 | ,016 | ,424 | -,143 | ,080  | ,184  | ,424 |
| [ Ich kann mir einen geeigneten Platz zum Schreiben auswählen. ] Um Ihnen die Beantwortung zu erleichtern, können Sie die Antwort in Prozent geben                                       | ,443   | ,366 | ,372 | ,371 | ,222 | ,344 | ,162  | ,778 | ,204  | ,436 | ,169 | ,345 | -,177 | ,159  | ,328  | ,429 |
| [ Ich kann mich durch Belohnungen zum Weiterschreiben motivieren. ] Um Ihnen die Beantwortung zu erleichtern, können Sie die Antwort in Prozent geben                                    | ,429   | ,340 | ,253 | ,399 | ,861 | ,411 | ,015  | ,435 | ,168  | ,370 | ,158 | ,400 | -,112 | -,066 | ,082  | ,312 |
| [ Ich kann mich beim Schreiben selbst belohnen, indem ich mein Vorankommen protokolliere. ] Um Ihnen die Beantwortung zu erleichtern, können Sie die Antwort in Prozent geben            | ,235   | ,202 | ,185 | ,132 | ,413 | ,520 | ,004  | ,296 | -,014 | ,119 | ,206 | ,131 | ,133  | -,121 | -,007 | ,223 |
| [ Ich kann mich beim Schreiben belohnen, indem ich mir bei gutem Vorankommen einen freien Tag gönne. ] Um Ihnen die Beantwortung zu erleichtern, können Sie die Antwort in Prozent geben | ,251   | ,256 | ,191 | ,295 | ,403 | ,235 | -,109 | ,385 | ,214  | ,372 | ,276 | ,089 | ,002  | -,027 | ,194  | ,353 |
| [ Ich kann mich beim Schreiben belohnen, indem ich mir schöne Dinge für gutes Vorankommen gönne. ] Um Ihnen die Beantwortung zu erleichtern, können Sie die Antwort in Prozent geben     | ,404   | ,267 | ,171 | ,311 | ,790 | ,252 | ,018  | ,363 | ,134  | ,255 | ,200 | ,319 | -,054 | -,012 | ,148  | ,290 |

Strukturmatrix

|                                                                                                                                                                                               | Faktor |      |      |      |      |      |      |      |      |      |       |      |       |       |      |      |
|-----------------------------------------------------------------------------------------------------------------------------------------------------------------------------------------------|--------|------|------|------|------|------|------|------|------|------|-------|------|-------|-------|------|------|
|                                                                                                                                                                                               | 1      | 2    | 3    | 4    | 5    | 6    | 7    | 8    | 9    | 10   | 11    | 12   | 13    | 14    | 15   | 16   |
| [ Ich kann mir gezieltes Feedback zu meinen Text einholen. ] Um Ihnen die Beantwortung zu erleichtern, können Sie die Antwort in Prozent geben                                                | ,241   | ,192 | ,295 | ,180 | ,044 | ,292 | ,710 | ,325 | ,162 | ,313 | ,122  | ,262 | -,179 | ,131  | ,281 | ,191 |
| [ Ich kann mir zu der Rohfassung meines Textes kritisches Feedback einholen. ] Um Ihnen die Beantwortung zu erleichtern, können Sie die Antwort in Prozent geben                              | ,280   | ,181 | ,285 | ,179 | ,117 | ,124 | ,769 | ,169 | ,016 | ,241 | ,050  | ,190 | -,080 | ,057  | ,103 | ,207 |
| [ Ich kann das Feedback Anderer zu meinen Texten umsetzen. ] Um Ihnen die Beantwortung zu erleichtern, können Sie die Antwort in Prozent geben                                                | ,423   | ,262 | ,275 | ,242 | ,290 | ,236 | ,609 | ,375 | ,078 | ,309 | -,089 | ,332 | -,236 | ,047  | ,143 | ,311 |
| [ Ich kann mich daran orientieren, welche Strategien KommilitonInnen beim Schreiben einsetzen.] Um Ihnen die Beantwortung zu erleichtern, können Sie die Antwort in Prozent geben             | ,106   | ,109 | ,077 | ,131 | ,171 | ,283 | ,130 | ,134 | ,085 | ,131 | ,038  | ,109 | ,042  | -,445 | ,045 | ,220 |
| [ Ich kann mich beim Schreiben selbst beobachten. ] Um Ihnen die Beantwortung zu erleichtern, können Sie die Antwort in Prozent geben                                                         | ,215   | ,278 | ,160 | ,171 | ,108 | ,547 | ,064 | ,160 | ,214 | ,228 | ,049  | ,221 | -,120 | ,107  | ,129 | ,130 |
| [ Ich kann mein Vorgehen beim Schreiben ändern, wenn ich merke, dass es nicht erfolgreich ist. ] Um Ihnen die Beantwortung zu erleichtern, können Sie die Antwort in Prozent geben            | ,658   | ,546 | ,624 | ,583 | ,249 | ,557 | ,041 | ,608 | ,428 | ,762 | -,047 | ,536 | -,375 | ,253  | ,281 | ,434 |
| [ Ich kann meinen Zeitplan für das Schreiben anpassen, wenn ich merke, dass ich ihn nicht einhalten kann. ] Um Ihnen die Beantwortung zu erleichtern, können Sie die Antwort in Prozent geben | ,358   | ,231 | ,328 | ,244 | ,122 | ,311 | ,194 | ,323 | ,187 | ,316 | ,078  | ,313 | -,151 | ,141  | ,602 | ,232 |

Strukturmatrix

|                                                                                                                                                                                           | Faktor |      |      |      |       |      |       |      |      |      |       |      |       |       |      |      |
|-------------------------------------------------------------------------------------------------------------------------------------------------------------------------------------------|--------|------|------|------|-------|------|-------|------|------|------|-------|------|-------|-------|------|------|
|                                                                                                                                                                                           | 1      | 2    | 3    | 4    | 5     | 6    | 7     | 8    | 9    | 10   | 11    | 12   | 13    | 14    | 15   | 16   |
| [ Ich kann mein Vorankommen beim Schreiben nachvollziehen. ]<br>Um Ihnen die Beantwortung zu erleichtern, können Sie die Antwort in Prozent geben                                         | ,626   | ,498 | ,611 | ,632 | ,190  | ,591 | ,111  | ,635 | ,419 | ,743 | -,014 | ,578 | -,447 | ,379  | ,354 | ,386 |
| [ Ich kann mein Vorankommen beim Schreiben durch die Anzahl der geschriebenen Stunden nachvollziehen. ] Um Ihnen die Beantwortung zu erleichtern, können Sie die Antwort in Prozent geben | ,195   | ,297 | ,225 | ,358 | ,139  | ,657 | -,210 | ,317 | ,221 | ,339 | -,020 | ,359 | -,153 | -,065 | ,259 | ,276 |
| [ Ich kann mein Vorankommen beim Schreiben durch die Anzahl der geschriebenen Seiten nachvollziehen. ] Um Ihnen die Beantwortung zu erleichtern, können Sie die Antwort in Prozent geben  | ,364   | ,407 | ,357 | ,517 | ,283  | ,473 | ,063  | ,438 | ,293 | ,574 | -,069 | ,579 | -,366 | ,153  | ,057 | ,306 |
| [ Ich kann ausdauernd an meinem Text arbeiten. ] Um Ihnen die Beantwortung zu erleichtern, können Sie die Antwort in Prozent geben                                                        | ,558   | ,770 | ,471 | ,712 | ,321  | ,551 | -,181 | ,590 | ,353 | ,636 | -,133 | ,630 | -,522 | ,102  | ,411 | ,285 |
| [ Ich kann mehrere Ideen in einem Text zusammen führen. ] Um Ihnen die Beantwortung zu erleichtern, können Sie die Antwort in Prozent geben                                               | ,585   | ,468 | ,534 | ,491 | -,073 | ,543 | ,179  | ,490 | ,594 | ,659 | -,021 | ,408 | -,509 | ,585  | ,302 | ,371 |
| [ Ich kann eine Schreibblockade lösen und danach weiterschreiben. ] Um Ihnen die Beantwortung zu erleichtern, können Sie die Antwort in Prozent geben                                     | ,507   | ,533 | ,535 | ,502 | ,276  | ,454 | ,023  | ,503 | ,314 | ,601 | ,072  | ,486 | -,369 | ,166  | ,289 | ,120 |
| [ Ich kann mich lange Zeit auf das Schreiben konzentrieren, wenn es nötig ist. ] Um Ihnen die Beantwortung zu erleichtern, können Sie die Antwort in Prozent geben                        | ,590   | ,689 | ,307 | ,681 | ,313  | ,380 | -,147 | ,683 | ,378 | ,572 | -,195 | ,579 | -,432 | ,019  | ,394 | ,252 |

Strukturmatrix

|                                                                                                                                                                                | Faktor |      |      |      |       |      |       |      |      |      |       |      |       |      |      |      |
|--------------------------------------------------------------------------------------------------------------------------------------------------------------------------------|--------|------|------|------|-------|------|-------|------|------|------|-------|------|-------|------|------|------|
|                                                                                                                                                                                | 1      | 2    | 3    | 4    | 5     | 6    | 7     | 8    | 9    | 10   | 11    | 12   | 13    | 14   | 15   | 16   |
| [ Ich kann die Qualität meines Textes realistisch einschätzen. ]<br>Um Ihnen die Beantwortung zu erleichtern, können Sie die Antwort in Prozent geben                          | ,666   | ,421 | ,485 | ,517 | ,050  | ,420 | ,020  | ,436 | ,464 | ,563 | -,270 | ,461 | -,505 | ,222 | ,279 | ,310 |
| [ Ich kann die Anforderungen, die an meinen Text gestellt werden, erfüllen. ] Um Ihnen die Beantwortung zu erleichtern, können Sie die Antwort in Prozent geben                | ,550   | ,470 | ,606 | ,523 | -,056 | ,459 | ,116  | ,405 | ,635 | ,617 | -,022 | ,423 | -,495 | ,571 | ,519 | ,243 |
| [ Ich kann die von mir selbst gesetzten Kriterien für die Qualität meiner Texte erreichen. ] Um Ihnen die Beantwortung zu erleichtern, können Sie die Antwort in Prozent geben | ,665   | ,636 | ,575 | ,732 | ,238  | ,486 | ,079  | ,555 | ,554 | ,787 | -,066 | ,456 | -,495 | ,283 | ,349 | ,251 |
| [ Ich kann die von mir selbst gesetzten Teilziele beim Schreiben erreichen. ] Um Ihnen die Beantwortung zu erleichtern, können Sie die Antwort in Prozent geben                | ,671   | ,562 | ,562 | ,499 | ,399  | ,552 | -,062 | ,612 | ,272 | ,647 | ,179  | ,493 | -,340 | ,168 | ,389 | ,461 |
| [ Ich kann von mir selbst zu hoch gesetzte Ansprüche heruntersetzen.] Um Ihnen die Beantwortung zu erleichtern, können Sie die Antwort in Prozent geben                        | ,246   | ,165 | ,244 | ,149 | ,119  | ,160 | ,145  | ,184 | ,019 | ,437 | ,025  | ,146 | -,094 | ,058 | ,108 | ,187 |
| [ Ich kann meine Texte durch Überarbeitung besser machen. ] Um Ihnen die Beantwortung zu erleichtern, können Sie die Antwort in Prozent geben                                  | ,470   | ,409 | ,849 | ,420 | ,076  | ,404 | ,113  | ,462 | ,359 | ,544 | -,033 | ,353 | -,258 | ,276 | ,298 | ,355 |
| [ Ich kann meine Texte durch Überarbeitung verständlicher machen. ] Um Ihnen die Beantwortung zu erleichtern, können Sie die Antwort in Prozent geben                          | ,538   | ,341 | ,858 | ,341 | ,151  | ,426 | ,146  | ,392 | ,284 | ,523 | -,055 | ,303 | -,318 | ,241 | ,295 | ,327 |
| [ Ich kann mit der Qualität meiner Texte zufrieden sein. ] Um Ihnen die Beantwortung zu erleichtern, können Sie die Antwort in Prozent geben                                   | ,589   | ,522 | ,627 | ,552 | ,027  | ,501 | ,021  | ,504 | ,606 | ,794 | -,070 | ,381 | -,510 | ,448 | ,434 | ,302 |

Strukturmatrix

|                                                                                                                                                                      | Faktor |      |      |      |      |      |       |      |      |      |       |      |       |      |      |      |
|----------------------------------------------------------------------------------------------------------------------------------------------------------------------|--------|------|------|------|------|------|-------|------|------|------|-------|------|-------|------|------|------|
|                                                                                                                                                                      | 1      | 2    | 3    | 4    | 5    | 6    | 7     | 8    | 9    | 10   | 11    | 12   | 13    | 14   | 15   | 16   |
| [ Ich kann ein gutes Gefühl für das Vorankommen beim Schreiben entwickeln. ] Um Ihnen die Beantwortung zu erleichtern, können Sie die Antwort in Prozent geben       | ,632   | ,519 | ,570 | ,627 | ,347 | ,684 | ,057  | ,669 | ,473 | ,733 | ,177  | ,517 | -,340 | ,383 | ,300 | ,542 |
| [ Ich kann die Zeit, die mir zum Schreiben zur Verfügung steht, gut einschätzen. ] Um Ihnen die Beantwortung zu erleichtern, können Sie die Antwort in Prozent geben | ,665   | ,517 | ,485 | ,480 | ,375 | ,542 | ,044  | ,524 | ,181 | ,540 | ,177  | ,667 | -,417 | ,135 | ,305 | ,615 |
| [ Ich kann vermeiden, dass ich einen Fehler beim nächsten Mal wieder mache. ] Um Ihnen die Beantwortung zu erleichtern, können Sie die Antwort in Prozent geben      | ,586   | ,545 | ,592 | ,612 | ,171 | ,498 | -,104 | ,599 | ,472 | ,603 | -,091 | ,474 | -,308 | ,215 | ,265 | ,534 |
| [ Ich kann aus misslungenen Schreibertüchtungen lernen. ] Um Ihnen die Beantwortung zu erleichtern, können Sie die Antwort in Prozent geben                          | ,441   | ,359 | ,414 | ,457 | ,236 | ,507 | -,047 | ,616 | ,365 | ,601 | ,061  | ,372 | -,248 | ,073 | ,460 | ,629 |
| [ Ich kann mein Vorgehen bei Schreibprojekten durch Erfahrung verbessern. ] Um Ihnen die Beantwortung zu erleichtern, können Sie die Antwort in Prozent geben        | ,577   | ,465 | ,516 | ,497 | ,288 | ,420 | ,018  | ,625 | ,421 | ,549 | ,016  | ,376 | -,270 | ,183 | ,290 | ,632 |
| [ Ich kann einschätzen, was ich beim nächsten Mal anders machen muss. ] Um Ihnen die Beantwortung zu erleichtern, können Sie die Antwort in Prozent geben            | ,504   | ,531 | ,528 | ,456 | ,126 | ,447 | -,015 | ,555 | ,424 | ,610 | -,080 | ,317 | -,270 | ,063 | ,398 | ,626 |

Extraktionsmethode: Hauptachsenfaktorenanalyse.  
 Rotationsmethode: Promax mit Kaiser-Normalisierung.

Korrelationsmatrix für Faktor

| Faktor | 1     | 2     | 3     | 4     | 5     | 6     | 7     | 8     | 9     | 10    | 11    | 12    | 13    | 14    | 15    | 16    |
|--------|-------|-------|-------|-------|-------|-------|-------|-------|-------|-------|-------|-------|-------|-------|-------|-------|
| 1      | 1,000 | ,573  | ,599  | ,536  | ,392  | ,526  | ,014  | ,627  | ,349  | ,607  | ,094  | ,533  | -,327 | ,142  | ,444  | ,449  |
| 2      | ,573  | 1,000 | ,422  | ,698  | ,289  | ,460  | -,081 | ,595  | ,461  | ,618  | -,119 | ,533  | -,460 | ,087  | ,337  | ,397  |
| 3      | ,599  | ,422  | 1,000 | ,467  | ,103  | ,556  | ,112  | ,447  | ,422  | ,645  | ,024  | ,386  | -,313 | ,376  | ,386  | ,306  |
| 4      | ,536  | ,698  | ,467  | 1,000 | ,259  | ,500  | -,025 | ,585  | ,597  | ,726  | -,127 | ,557  | -,476 | ,250  | ,255  | ,370  |
| 5      | ,392  | ,289  | ,103  | ,259  | 1,000 | ,270  | -,121 | ,404  | -,047 | ,155  | ,242  | ,291  | ,169  | -,288 | ,047  | ,368  |
| 6      | ,526  | ,460  | ,556  | ,500  | ,270  | 1,000 | -,011 | ,562  | ,477  | ,622  | ,111  | ,508  | -,245 | ,320  | ,263  | ,415  |
| 7      | ,014  | -,081 | ,112  | -,025 | -,121 | -,011 | 1,000 | -,091 | -,007 | ,010  | ,053  | -,055 | ,036  | ,309  | -,182 | ,052  |
| 8      | ,627  | ,595  | ,447  | ,585  | ,404  | ,562  | -,091 | 1,000 | ,384  | ,677  | ,085  | ,542  | -,368 | ,081  | ,407  | ,515  |
| 9      | ,349  | ,461  | ,422  | ,597  | -,047 | ,477  | -,007 | ,384  | 1,000 | ,616  | -,157 | ,266  | -,403 | ,477  | ,262  | ,243  |
| 10     | ,607  | ,618  | ,645  | ,726  | ,155  | ,622  | ,010  | ,677  | ,616  | 1,000 | -,057 | ,536  | -,604 | ,369  | ,412  | ,383  |
| 11     | ,094  | -,119 | ,024  | -,127 | ,242  | ,111  | ,053  | ,085  | -,157 | -,057 | 1,000 | -,086 | ,332  | ,045  | ,131  | ,118  |
| 12     | ,533  | ,533  | ,386  | ,557  | ,291  | ,508  | -,055 | ,542  | ,266  | ,536  | -,086 | 1,000 | -,537 | ,075  | ,338  | ,282  |
| 13     | -,327 | -,460 | -,313 | -,476 | ,169  | -,245 | ,036  | -,368 | -,403 | -,604 | ,332  | -,537 | 1,000 | -,238 | -,327 | -,010 |
| 14     | ,142  | ,087  | ,376  | ,250  | -,288 | ,320  | ,309  | ,081  | ,477  | ,369  | ,045  | ,075  | -,238 | 1,000 | -,024 | ,073  |
| 15     | ,444  | ,337  | ,386  | ,255  | ,047  | ,263  | -,182 | ,407  | ,262  | ,412  | ,131  | ,338  | -,327 | -,024 | 1,000 | ,170  |
| 16     | ,449  | ,397  | ,306  | ,370  | ,368  | ,415  | ,052  | ,515  | ,243  | ,383  | ,118  | ,282  | -,010 | ,073  | ,170  | 1,000 |

Extraktionsmethode: Hauptachsenfaktorenanalyse.

Rotationsmethode: Promax mit Kaiser-Normalisierung.

\* Parallel Analysis program.

set mxloops=9000 printback=off width=80 seed = 1953125.

### Matrix

Run MATRIX procedure:

PARALLEL ANALYSIS:

Principal Axis / Common Factor Analysis

Specifications for this Run:

Ncases 121  
 Nvars 70  
 Ndataset 100  
 Percent 95

Random Data Eigenvalues

| Root     | Means    | Prcntyle |
|----------|----------|----------|
| 1.000000 | 2.542928 | 2.809912 |
| 2.000000 | 2.338190 | 2.456945 |

|           |          |          |
|-----------|----------|----------|
| 3.000000  | 2.189480 | 2.325966 |
| 4.000000  | 2.077244 | 2.168478 |
| 5.000000  | 1.973457 | 2.085619 |
| 6.000000  | 1.881046 | 1.986887 |
| 7.000000  | 1.792831 | 1.873894 |
| 8.000000  | 1.713564 | 1.781624 |
| 9.000000  | 1.638172 | 1.705120 |
| 10.000000 | 1.564037 | 1.624979 |
| 11.000000 | 1.498577 | 1.554038 |
| 12.000000 | 1.432321 | 1.495516 |
| 13.000000 | 1.371117 | 1.420189 |
| 14.000000 | 1.309090 | 1.365092 |
| 15.000000 | 1.246111 | 1.303464 |
| 16.000000 | 1.193924 | 1.242229 |
| 17.000000 | 1.143358 | 1.194124 |
| 18.000000 | 1.088329 | 1.144655 |
| 19.000000 | 1.035351 | 1.093929 |
| 20.000000 | .987753  | 1.036411 |
| 21.000000 | .941780  | .991099  |
| 22.000000 | .895323  | .940355  |
| 23.000000 | .848749  | .898800  |
| 24.000000 | .803196  | .855892  |
| 25.000000 | .760616  | .807982  |
| 26.000000 | .718411  | .766023  |
| 27.000000 | .680196  | .724159  |
| 28.000000 | .642752  | .682023  |
| 29.000000 | .600352  | .645808  |
| 30.000000 | .562546  | .607530  |
| 31.000000 | .527055  | .571753  |
| 32.000000 | .493968  | .532948  |
| 33.000000 | .457055  | .497503  |
| 34.000000 | .423391  | .463734  |
| 35.000000 | .390583  | .428152  |
| 36.000000 | .359378  | .399997  |
| 37.000000 | .327513  | .364921  |
| 38.000000 | .297143  | .336030  |
| 39.000000 | .266541  | .303686  |
| 40.000000 | .237623  | .272585  |
| 41.000000 | .209716  | .243780  |
| 42.000000 | .181348  | .215504  |
| 43.000000 | .155266  | .187440  |
| 44.000000 | .127667  | .159726  |
| 45.000000 | .102827  | .130974  |
| 46.000000 | .076661  | .102616  |
| 47.000000 | .053612  | .082100  |



|           |          |          |
|-----------|----------|----------|
| 48.000000 | .029992  | .057788  |
| 49.000000 | .007166  | .031535  |
| 50.000000 | -.014575 | .018396  |
| 51.000000 | -.036541 | -.009343 |
| 52.000000 | -.057929 | -.033454 |
| 53.000000 | -.079416 | -.054931 |
| 54.000000 | -.099631 | -.073058 |
| 55.000000 | -.119986 | -.097137 |
| 56.000000 | -.135826 | -.110930 |
| 57.000000 | -.154233 | -.129322 |
| 58.000000 | -.172737 | -.152289 |
| 59.000000 | -.188951 | -.170172 |
| 60.000000 | -.205972 | -.185484 |
| 61.000000 | -.220063 | -.204513 |
| 62.000000 | -.235281 | -.216295 |
| 63.000000 | -.249470 | -.232724 |
| 64.000000 | -.262924 | -.244305 |
| 65.000000 | -.275871 | -.260162 |
| 66.000000 | -.288633 | -.272965 |
| 67.000000 | -.299547 | -.284727 |
| 68.000000 | -.309685 | -.293560 |
| 69.000000 | -.321856 | -.309273 |
| 70.000000 | -.333766 | -.318113 |

Compare the random data eigenvalues to the

real-data eigenvalues that are obtained from a

Common Factor Analysis in which the # of factors

extracted equals the # of variables/items, and the

number of iterations is fixed at zero;

To obtain these real-data values using SPSS, see the

sample commands at the end of the parallel.sps program,

or use the rawpar.sps program.

Warning: Parallel analyses of adjusted correlation matrices

eg, with SMCs on the diagonal, tend to indicate more factors

than warranted (Buja, A., & Eyuboglu, N., 1992, Remarks on parallel analysis. Multivariate Behavioral Research, 27, 509-540.).

The eigenvalues for trivial, negligible factors in the real data commonly surpass corresponding random data eigenvalues for the same roots. The eigenvalues from parallel analyses can be used to determine the real data eigenvalues that are beyond chance, but additional procedures should then be used to trim trivial factors.

Principal components eigenvalues are often used to determine the number of common factors. This is the default in most statistical software packages, and it is the primary practice in the literature. It is also the method used by many factor analysis experts, including Cattell, who often examined principal components eigenvalues in his scree plots to determine the number of common factors. But others believe this common practice is wrong. Principal components eigenvalues are based on all of the variance in correlation matrices, including both the variance that is shared among variables and the variances that are unique to the variables. In contrast, principal axis eigenvalues are based solely on the shared variance among the variables. The two procedures are qualitatively different. Some therefore claim that the eigenvalues from one





MGET created matrix CR.  
The matrix has 70 rows and 70 columns.  
The matrix was read from the record(s) of row type CORR.

Raw Data Eigenvalues

| Root      | Eigen.    |
|-----------|-----------|
| 1.000000  | 23.378990 |
| 2.000000  | 3.619490  |
| 3.000000  | 3.126235  |
| 4.000000  | 2.446719  |
| 5.000000  | 2.096107  |
| 6.000000  | 1.921226  |
| 7.000000  | 1.753645  |
| 8.000000  | 1.708427  |
| 9.000000  | 1.500305  |
| 10.000000 | 1.455898  |
| 11.000000 | 1.236344  |
| 12.000000 | 1.080268  |
| 13.000000 | 1.024619  |
| 14.000000 | 1.004710  |
| 15.000000 | .895578   |
| 16.000000 | .844467   |
| 17.000000 | .769986   |
| 18.000000 | .721830   |
| 19.000000 | .682054   |
| 20.000000 | .612187   |
| 21.000000 | .533843   |
| 22.000000 | .484167   |
| 23.000000 | .482982   |
| 24.000000 | .470432   |
| 25.000000 | .442879   |
| 26.000000 | .407741   |
| 27.000000 | .400853   |
| 28.000000 | .370752   |
| 29.000000 | .321124   |
| 30.000000 | .297611   |
| 31.000000 | .291541   |
| 32.000000 | .271492   |
| 33.000000 | .241072   |
| 34.000000 | .231826   |
| 35.000000 | .221715   |
| 36.000000 | .182908   |
| 37.000000 | .161135   |
| 38.000000 | .155856   |
| 39.000000 | .145038   |

```

40.000000 .125773
41.000000 .093659
42.000000 .081572
43.000000 .070053
44.000000 .059594
45.000000 .052059
46.000000 .046490
47.000000 .024044
48.000000 .009512
49.000000 .000329
50.000000 -.015105
51.000000 -.017212
52.000000 -.025746
53.000000 -.035930
54.000000 -.044543
55.000000 -.053771
56.000000 -.060126
57.000000 -.062015
58.000000 -.072908
59.000000 -.074555
60.000000 -.086021
61.000000 -.096887
62.000000 -.106931
63.000000 -.107713
64.000000 -.111370
65.000000 -.119681
66.000000 -.126907
67.000000 -.133151
68.000000 -.138544
69.000000 -.149295
70.000000 -.151367

```

----- END MATRIX -----

## Correlation

Listwise deletion

| Number of cases | Number of cases excluded |
|-----------------|--------------------------|
| 121             | 0                        |

## Number of Components/Factors

**Number of Components/Factors  
estimated for the following  
Correlation Matrix**

| Correlation Matrix      | Missing values |
|-------------------------|----------------|
| Heterogenous (Two Step) | listwise       |

**Velicer's MAP values**

|    | Squared average partial correlations | 4th average partial correlations |
|----|--------------------------------------|----------------------------------|
| 0  | ,116                                 | ,023                             |
| 1  | ,019                                 | ,002                             |
| 2  | ,017                                 | ,001                             |
| 3  | ,016                                 | ,001                             |
| 4  | ,016                                 | ,001                             |
| 5  | ,016                                 | ,001                             |
| 6  | ,016                                 | ,001                             |
| 7  | ,016                                 | ,001                             |
| 8  | ,015                                 | ,001                             |
| 9  | ,015                                 | ,001                             |
| 10 | ,015                                 | ,001                             |
| 11 | ,015                                 | ,001                             |
| 12 | ,015                                 | ,001                             |
| 13 | ,015                                 | ,001                             |
| 14 | ,015                                 | ,001                             |
| 15 | ,015                                 | ,001                             |
| 16 | ,016                                 | ,001                             |
| 17 | ,016                                 | ,001                             |
| 18 | ,016                                 | ,001                             |
| 19 | ,016                                 | ,001                             |
| 20 | ,016                                 | ,001                             |
| 21 | ,017                                 | ,001                             |
| 22 | ,018                                 | ,001                             |
| 23 | ,018                                 | ,001                             |
| 24 | ,019                                 | ,001                             |
| 25 | ,020                                 | ,001                             |
| 26 | ,020                                 | ,001                             |
| 27 | ,020                                 | ,001                             |
| 28 | ,021                                 | ,001                             |

Velicer's MAP values

|    | Squared average partial correlations | 4th average partial correlations |
|----|--------------------------------------|----------------------------------|
| 29 | ,022                                 | ,002                             |
| 30 | ,023                                 | ,002                             |
| 31 | ,023                                 | ,002                             |
| 32 | ,024                                 | ,002                             |
| 33 | ,025                                 | ,002                             |
| 34 | ,026                                 | ,002                             |
| 35 | ,027                                 | ,002                             |
| 36 | ,027                                 | ,002                             |
| 37 | ,029                                 | ,003                             |
| 38 | ,030                                 | ,003                             |
| 39 | ,031                                 | ,003                             |
| 40 | ,032                                 | ,003                             |
| 41 | ,033                                 | ,003                             |
| 42 | ,035                                 | ,004                             |
| 43 | ,037                                 | ,004                             |
| 44 | ,038                                 | ,004                             |
| 45 | ,039                                 | ,005                             |
| 46 | ,041                                 | ,005                             |
| 47 | ,043                                 | ,006                             |
| 48 | ,045                                 | ,006                             |
| 49 | ,046                                 | ,007                             |
| 50 | ,050                                 | ,008                             |
| 51 | ,053                                 | ,008                             |
| 52 | ,055                                 | ,009                             |
| 53 | ,057                                 | ,010                             |
| 54 | ,061                                 | ,011                             |
| 55 | ,065                                 | ,012                             |
| 56 | ,071                                 | ,014                             |
| 57 | ,077                                 | ,016                             |
| 58 | ,084                                 | ,019                             |
| 59 | ,092                                 | ,022                             |
| 60 | ,098                                 | ,025                             |
| 61 | ,111                                 | ,031                             |
| 62 | ,126                                 | ,039                             |
| 63 | ,142                                 | ,047                             |
| 64 | ,166                                 | ,063                             |





/CRITERIA FACTORS (5) ITERATE (100)  
 /EXTRACTION PAF  
 /CRITERIA ITERATE (100)  
 /ROTATION PROMAX (4)  
 /METHOD=CORRELATION.

## Faktorenanalyse

### Deskriptive Statistiken

|                                                                                                                                                                                                                                        | Mittelwert | Standardabweichung | Analyse N |
|----------------------------------------------------------------------------------------------------------------------------------------------------------------------------------------------------------------------------------------|------------|--------------------|-----------|
| <input type="checkbox"/> Ich kann die Anforderungen unterschiedlicher Textsorten (wie z. B. Hausarbeit, Protokoll, Critical Paper, usw.) verstehen.] Um Ihnen die Beantwortung zu erleichtern, können Sie die Antwort in Prozent geben | 8,28       | 2,521              | 121       |
| <input type="checkbox"/> Ich kann mir konkrete Schreibziele setzen. ] Um Ihnen die Beantwortung zu erleichtern, können Sie die Antwort in Prozent geben                                                                                | 7,05       | 2,866              | 121       |
| <input type="checkbox"/> Ich kann mein Schreibprojekt in kleinere Schreibziele unterteilen. ] Um Ihnen die Beantwortung zu erleichtern, können Sie die Antwort in Prozent geben                                                        | 7,17       | 2,750              | 121       |
| <input type="checkbox"/> Ich kann meine Ideen für meinen Text vor dem Schreiben strukturieren. ] Um Ihnen die Beantwortung zu erleichtern, können Sie die Antwort in Prozent geben                                                     | 7,35       | 2,915              | 121       |
| <input type="checkbox"/> Ich kann mir das Schreiben in sinnvolle Arbeitsschritte unterteilen. ] Um Ihnen die Beantwortung zu erleichtern, können Sie die Antwort in Prozent geben                                                      | 7,36       | 2,559              | 121       |
| <input type="checkbox"/> Ich kann meine Ideen auch bei einem komplexen Thema gut organisieren. ] Um Ihnen die Beantwortung zu erleichtern, können Sie die Antwort in Prozent geben                                                     | 7,17       | 2,502              | 121       |

Deskriptive Statistiken

|                                                                                                                                                                                                                            | Mittelwert | Standardabweichung | Analyse N |
|----------------------------------------------------------------------------------------------------------------------------------------------------------------------------------------------------------------------------|------------|--------------------|-----------|
| <input type="checkbox"/> Ich kann mich dazu motivieren mit dem Schreiben anzufangen. ]<br>Um Ihnen die Beantwortung zu erleichtern, können Sie die Antwort in Prozent geben                                                | 6,17       | 3,057              | 121       |
| <input type="checkbox"/> Ich kann mich erst auf den letzten Drücker zum Schreiben motivieren. ] Um Ihnen die Beantwortung zu erleichtern, können Sie die Antwort in Prozent geben                                          | 4,87       | 3,478              | 121       |
| <input type="checkbox"/> Ich kann Probleme, die beim Schreiben auftauchen, überwinden. ] Um Ihnen die Beantwortung zu erleichtern, können Sie die Antwort in Prozent geben                                                 | 7,73       | 2,244              | 121       |
| <input type="checkbox"/> Ich kann mich durch das Vorstellen negativer Konsequenzen des Nichtschreibens zum Weiterschreiben motivieren. ] Um Ihnen die Beantwortung zu erleichtern, können Sie die Antwort in Prozent geben | 6,79       | 3,314              | 121       |
| <input type="checkbox"/> Ich kann mich durch das Vorstellen positiver Konsequenzen zum Weiterschreiben motivieren. ] Um Ihnen die Beantwortung zu erleichtern, können Sie die Antwort in Prozent geben                     | 6,95       | 3,087              | 121       |
| <input type="checkbox"/> Ich kann Freude am Schreiben entwickeln. ] Um Ihnen die Beantwortung zu erleichtern, können Sie die Antwort in Prozent geben                                                                      | 7,44       | 2,884              | 121       |
| <input type="checkbox"/> Ich kann Interesse für das Schreiben entwickeln. ] Um Ihnen die Beantwortung zu erleichtern, können Sie die Antwort in Prozent geben                                                              | 7,64       | 2,787              | 121       |

Deskriptive Statistiken

|                                                                                                                                                                                                                   | Mittelwert | Standardabweichung | Analyse N |
|-------------------------------------------------------------------------------------------------------------------------------------------------------------------------------------------------------------------|------------|--------------------|-----------|
| <input type="checkbox"/> Ich kann leicht Wege finden mein Interesse am Schreiben zu steigern. ] Um Ihnen die Beantwortung zu erleichtern, können Sie die Antwort in Prozent geben                                 | 5,87       | 2,735              | 121       |
| <input type="checkbox"/> Ich kann mir beim Schreiben vornehmen, gute Noten durch meine schriftlichen Arbeiten zu erzielen. ] Um Ihnen die Beantwortung zu erleichtern, können Sie die Antwort in Prozent geben    | 8,08       | 2,777              | 121       |
| <input type="checkbox"/> Ich kann mir beim Schreiben vornehmen, durch meine schriftlichen Arbeiten zu zeigen, wie gut ich bin.] Um Ihnen die Beantwortung zu erleichtern, können Sie die Antwort in Prozent geben | 7,59       | 2,949              | 121       |
| <input type="checkbox"/> Ich kann mir vornehmen, durch das Schreiben mein Wissen zu erweitern. ] Um Ihnen die Beantwortung zu erleichtern, können Sie die Antwort in Prozent geben                                | 7,30       | 3,135              | 121       |
| <input type="checkbox"/> Ich kann mir vornehmen, durch das Schreiben zu neuen Erkenntnissen zu gelangen. ] Um Ihnen die Beantwortung zu erleichtern, können Sie die Antwort in Prozent geben                      | 6,79       | 2,813              | 121       |
| <input type="checkbox"/> Ich kann mein Vorgehen beim Schreiben überwachen. ] Um Ihnen die Beantwortung zu erleichtern, können Sie die Antwort in Prozent geben                                                    | 6,28       | 2,829              | 121       |
| <input type="checkbox"/> Ich kann mich beim Schreiben durch lautes Vorlesen von Textstellen unterstützen. ] Um Ihnen die Beantwortung zu erleichtern, können Sie die Antwort in Prozent geben                     | 6,07       | 3,312              | 121       |

Deskriptive Statistiken

|                                                                                                                                                                                                                          | Mittelwert | Standardabweichung | Analyse N |
|--------------------------------------------------------------------------------------------------------------------------------------------------------------------------------------------------------------------------|------------|--------------------|-----------|
| <input type="checkbox"/> Ich kann mich beim Schreiben durch innerliches Vorlesen von bereits geschriebenen Textstellen unterstützen. ] Um Ihnen die Beantwortung zu erleichtern, können Sie die Antwort in Prozent geben | 7,13       | 3,071              | 121       |
| <input type="checkbox"/> Ich kann mir die Dinge, die ich in meinem Text beschreibe, bildlich vorstellen. ] Um Ihnen die Beantwortung zu erleichtern, können Sie die Antwort in Prozent geben                             | 7,44       | 2,639              | 121       |
| <input type="checkbox"/> Ich kann zunächst einen Entwurf meines Textes anfertigen. ] Um Ihnen die Beantwortung zu erleichtern, können Sie die Antwort in Prozent geben                                                   | 6,44       | 3,071              | 121       |
| <input type="checkbox"/> Ich kann mir eine Gliederung erstellen, die mich beim Schreiben unterstützt. ] Um Ihnen die Beantwortung zu erleichtern, können Sie die Antwort in Prozent geben                                | 8,54       | 2,589              | 121       |
| <input type="checkbox"/> Ich kann mich auf das Schreiben konzentrieren. ] Um Ihnen die Beantwortung zu erleichtern, können Sie die Antwort in Prozent geben                                                              | 7,54       | 2,717              | 121       |
| <input type="checkbox"/> Ich kann Ablenkungen beim Schreiben ausblenden. ] Um Ihnen die Beantwortung zu erleichtern, können Sie die Antwort in Prozent geben                                                             | 4,92       | 2,946              | 121       |
| <input type="checkbox"/> Ich kann mich auf das Schreiben konzentrieren, auch wenn um mich herum viel passiert. ] Um Ihnen die Beantwortung zu erleichtern, können Sie die Antwort in Prozent geben                       | 4,71       | 2,827              | 121       |

Deskriptive Statistiken

|                                                                                                                                                                                                                 | Mittelwert | Standardabweichung | Analyse N |
|-----------------------------------------------------------------------------------------------------------------------------------------------------------------------------------------------------------------|------------|--------------------|-----------|
| <input type="checkbox"/> Ich kann mich auch auf das Schreiben konzentrieren, wenn ich andere Dinge im Kopf habe. ] Um Ihnen die Beantwortung zu erleichtern, können Sie die Antwort in Prozent geben            | 4,69       | 2,789              | 121       |
| <input type="checkbox"/> Ich kann mich wieder auf das Schreiben konzentrieren, wenn ich kurz an etwas anderes gedacht habe. ] Um Ihnen die Beantwortung zu erleichtern, können Sie die Antwort in Prozent geben | 7,28       | 2,662              | 121       |
| <input type="checkbox"/> Ich kann mich wieder auf das Schreiben konzentrieren, wenn ich kurz ablenkt war. ] Um Ihnen die Beantwortung zu erleichtern, können Sie die Antwort in Prozent geben                   | 7,25       | 2,534              | 121       |
| <input type="checkbox"/> Ich kann mich an meine festen Schreibzeiten halten. ] Um Ihnen die Beantwortung zu erleichtern, können Sie die Antwort in Prozent geben                                                | 5,07       | 3,156              | 121       |
| <input type="checkbox"/> Ich kann mir feste Schreibzeiten einplanen. ] Um Ihnen die Beantwortung zu erleichtern, können Sie die Antwort in Prozent geben                                                        | 5,46       | 3,025              | 121       |
| <input type="checkbox"/> Ich kann meine Schreibzeit effektiv nutzen. ] Um Ihnen die Beantwortung zu erleichtern, können Sie die Antwort in Prozent geben                                                        | 6,56       | 2,834              | 121       |
| <input type="checkbox"/> Ich kann meine Texte bis zur Abgabefrist fertigstellen. ] Um Ihnen die Beantwortung zu erleichtern, können Sie die Antwort in Prozent geben                                            | 9,60       | 2,223              | 121       |
| <input type="checkbox"/> Ich kann mir meine Zeit so einteilen, dass ich konzentriert an meinem Text arbeite. ] Um Ihnen die Beantwortung zu erleichtern, können Sie die Antwort in Prozent geben                | 6,67       | 2,879              | 121       |

Deskriptive Statistiken

|                                                                                                                                                                                          | Mittelwert | Standardabweichung | Analyse N |
|------------------------------------------------------------------------------------------------------------------------------------------------------------------------------------------|------------|--------------------|-----------|
| [ Ich kann, auch wenn viel zu tun ist, Zeit finden, um konzentriert an meinem Text zu arbeiten. ] Um Ihnen die Beantwortung zu erleichtern, können Sie die Antwort in Prozent geben      | 6,12       | 2,852              | 121       |
| [ Ich kann mir meinen Schreibplatz so gestalten, dass ich ungestört schreiben kann. ] Um Ihnen die Beantwortung zu erleichtern, können Sie die Antwort in Prozent geben                  | 7,31       | 3,019              | 121       |
| [ Ich kann mir einen geeigneten Platz zum Schreiben auswählen. ] Um Ihnen die Beantwortung zu erleichtern, können Sie die Antwort in Prozent geben                                       | 8,16       | 2,699              | 121       |
| [ Ich kann mich durch Belohnungen zum Weiterschreiben motivieren. ] Um Ihnen die Beantwortung zu erleichtern, können Sie die Antwort in Prozent geben                                    | 6,64       | 3,143              | 121       |
| [ Ich kann mich beim Schreiben selbst belohnen, indem ich mein Vorankommen protokolliere. ] Um Ihnen die Beantwortung zu erleichtern, können Sie die Antwort in Prozent geben            | 3,82       | 3,019              | 121       |
| [ Ich kann mich beim Schreiben belohnen, indem ich mir bei gutem Vorankommen einen freien Tag gönne. ] Um Ihnen die Beantwortung zu erleichtern, können Sie die Antwort in Prozent geben | 5,98       | 3,429              | 121       |
| [ Ich kann mich beim Schreiben belohnen, indem ich mir schöne Dinge für gutes Vorankommen gönne. ] Um Ihnen die Beantwortung zu erleichtern, können Sie die Antwort in Prozent geben     | 7,04       | 3,226              | 121       |

Deskriptive Statistiken

|                                                                                                                                                                                               | Mittelwert | Standardabweichung | Analyse N |
|-----------------------------------------------------------------------------------------------------------------------------------------------------------------------------------------------|------------|--------------------|-----------|
| [ Ich kann mir gezieltes Feedback zu meinem Text einholen. ] Um Ihnen die Beantwortung zu erleichtern, können Sie die Antwort in Prozent geben                                                | 7,11       | 2,909              | 121       |
| [ Ich kann mir zu der Rohfassung meines Textes kritisches Feedback einholen. ] Um Ihnen die Beantwortung zu erleichtern, können Sie die Antwort in Prozent geben                              | 6,85       | 3,172              | 121       |
| [ Ich kann das Feedback Anderer zu meinen Texten umsetzen. ] Um Ihnen die Beantwortung zu erleichtern, können Sie die Antwort in Prozent geben                                                | 8,06       | 2,678              | 121       |
| [ Ich kann mich daran orientieren, welche Strategien KommilitonInnen beim Schreiben einsetzen.] Um Ihnen die Beantwortung zu erleichtern, können Sie die Antwort in Prozent geben             | 4,45       | 2,736              | 121       |
| [ Ich kann mich beim Schreiben selbst beobachten. ] Um Ihnen die Beantwortung zu erleichtern, können Sie die Antwort in Prozent geben                                                         | 5,27       | 3,101              | 121       |
| [ Ich kann mein Vorgehen beim Schreiben ändern, wenn ich merke, dass es nicht erfolgreich ist. ] Um Ihnen die Beantwortung zu erleichtern, können Sie die Antwort in Prozent geben            | 7,12       | 2,762              | 121       |
| [ Ich kann meinen Zeitplan für das Schreiben anpassen, wenn ich merke, dass ich ihn nicht einhalten kann. ] Um Ihnen die Beantwortung zu erleichtern, können Sie die Antwort in Prozent geben | 7,81       | 2,570              | 121       |



Deskriptive Statistiken

|                                                                                                                                                                                                                  | Mittelwert | Standardabweichung | Analyse N |
|------------------------------------------------------------------------------------------------------------------------------------------------------------------------------------------------------------------|------------|--------------------|-----------|
| <input type="checkbox"/> Ich kann mein Vorankommen beim Schreiben nachvollziehen. ]<br>Um Ihnen die Beantwortung zu erleichtern, können Sie die Antwort in Prozent geben                                         | 7,79       | 2,474              | 121       |
| <input type="checkbox"/> Ich kann mein Vorankommen beim Schreiben durch die Anzahl der geschriebenen Stunden nachvollziehen. ] Um Ihnen die Beantwortung zu erleichtern, können Sie die Antwort in Prozent geben | 4,62       | 3,026              | 121       |
| <input type="checkbox"/> Ich kann mein Vorankommen beim Schreiben durch die Anzahl der geschriebenen Seiten nachvollziehen. ] Um Ihnen die Beantwortung zu erleichtern, können Sie die Antwort in Prozent geben  | 8,40       | 2,641              | 121       |
| <input type="checkbox"/> Ich kann ausdauernd an meinem Text arbeiten. ] Um Ihnen die Beantwortung zu erleichtern, können Sie die Antwort in Prozent geben                                                        | 7,32       | 2,905              | 121       |
| <input type="checkbox"/> Ich kann mehrere Ideen in einem Text zusammen führen. ] Um Ihnen die Beantwortung zu erleichtern, können Sie die Antwort in Prozent geben                                               | 8,46       | 2,251              | 121       |
| <input type="checkbox"/> Ich kann eine Schreibblockade lösen und danach weiterschreiben. ] Um Ihnen die Beantwortung zu erleichtern, können Sie die Antwort in Prozent geben                                     | 6,40       | 2,651              | 121       |
| <input type="checkbox"/> Ich kann mich lange Zeit auf das Schreiben konzentrieren, wenn es nötig ist. ] Um Ihnen die Beantwortung zu erleichtern, können Sie die Antwort in Prozent geben                        | 7,74       | 2,877              | 121       |
| <input type="checkbox"/> Ich kann die Qualität meines Textes realistisch einschätzen. ] Um Ihnen die Beantwortung zu erleichtern, können Sie die Antwort in Prozent geben                                        | 7,49       | 2,589              | 121       |

Deskriptive Statistiken

|                                                                                                                                                                                                       | Mittelwert | Standardabweichung | Analyse N |
|-------------------------------------------------------------------------------------------------------------------------------------------------------------------------------------------------------|------------|--------------------|-----------|
| <input type="checkbox"/> Ich kann die Anforderungen, die an meinen Text gestellt werden, erfüllen. ] Um Ihnen die Beantwortung zu erleichtern, können Sie die Antwort in Prozent geben                | 8,47       | 2,090              | 121       |
| <input type="checkbox"/> Ich kann die von mir selbst gesetzten Kriterien für die Qualität meiner Texte erreichen. ] Um Ihnen die Beantwortung zu erleichtern, können Sie die Antwort in Prozent geben | 7,84       | 2,429              | 121       |
| <input type="checkbox"/> Ich kann die von mir selbst gesetzten Teilziele beim Schreiben erreichen. ] Um Ihnen die Beantwortung zu erleichtern, können Sie die Antwort in Prozent geben                | 7,19       | 2,919              | 121       |
| <input type="checkbox"/> Ich kann von mir selbst zu hoch gesetzte Ansprüche heruntersetzen.] Um Ihnen die Beantwortung zu erleichtern, können Sie die Antwort in Prozent geben                        | 5,91       | 2,930              | 121       |
| <input type="checkbox"/> Ich kann meine Texte durch Überarbeitung besser machen. ] Um Ihnen die Beantwortung zu erleichtern, können Sie die Antwort in Prozent geben                                  | 8,55       | 2,516              | 121       |
| <input type="checkbox"/> Ich kann meine Texte durch Überarbeitung verständlicher machen. ] Um Ihnen die Beantwortung zu erleichtern, können Sie die Antwort in Prozent geben                          | 8,49       | 2,367              | 121       |
| <input type="checkbox"/> Ich kann mit der Qualität meiner Texte zufrieden sein. ] Um Ihnen die Beantwortung zu erleichtern, können Sie die Antwort in Prozent geben                                   | 8,02       | 2,559              | 121       |
| <input type="checkbox"/> Ich kann ein gutes Gefühl für das Vorankommen beim Schreiben entwickeln. ] Um Ihnen die Beantwortung zu erleichtern, können Sie die Antwort in Prozent geben                 | 7,20       | 2,747              | 121       |

Deskriptive Statistiken

|                                                                                                                                                                                                                    | Mittelwert | Standardabweichung | Analyse N |
|--------------------------------------------------------------------------------------------------------------------------------------------------------------------------------------------------------------------|------------|--------------------|-----------|
| <input type="checkbox"/> Ich kann die Zeit, die mir zum Schreiben zur Verfügung steht, gut einschätzen. <input type="checkbox"/> Um Ihnen die Beantwortung zu erleichtern, können Sie die Antwort in Prozent geben | 7,00       | 2,864              | 121       |
| <input type="checkbox"/> Ich kann vermeiden, dass ich einen Fehler beim nächsten Mal wieder mache. <input type="checkbox"/> Um Ihnen die Beantwortung zu erleichtern, können Sie die Antwort in Prozent geben      | 7,60       | 2,594              | 121       |
| <input type="checkbox"/> Ich kann aus misslungenen Schreibertahrungen lernen. <input type="checkbox"/> Um Ihnen die Beantwortung zu erleichtern, können Sie die Antwort in Prozent geben                           | 7,43       | 2,819              | 121       |
| <input type="checkbox"/> Ich kann mein Vorgehen bei Schreibprojekten durch Erfahrung verbessern. <input type="checkbox"/> Um Ihnen die Beantwortung zu erleichtern, können Sie die Antwort in Prozent geben        | 7,97       | 2,674              | 121       |
| <input type="checkbox"/> Ich kann einschätzen, was ich beim nächsten Mal anders machen muss. <input type="checkbox"/> Um Ihnen die Beantwortung zu erleichtern, können Sie die Antwort in Prozent geben            | 7,46       | 2,513              | 121       |





| 1 | 2 | 3 | 4 | 5 | 6 | 7 | 8 | 9 | 10 | 11 | 12 | 13 | 14 | 15 | 16 | 17 | 18 | 19 | 20 | 21 | 22 | 23 | 24 | 25 | 26 | 27 | 28 | 29 | 30 | 31 | 32 | 33 | 34 | 35 | 36 | 37 | 38 | 39 | 40 | 41 | 42 | 43 | 44 | 45 | 46 | 47 | 48 | 49 | 50 | 51 | 52 | 53 | 54 | 55 | 56 | 57 | 58 | 59 | 60 | 61 | 62 | 63 | 64 | 65 | 66 | 67 | 68 | 69 | 70 | 71 | 72 | 73 | 74 | 75 | 76 | 77 | 78 | 79 | 80 | 81 | 82 | 83 | 84 | 85 | 86 | 87 | 88 | 89 | 90 | 91 | 92 | 93 | 94 | 95 | 96 | 97 | 98 | 99 | 100 |
|---|---|---|---|---|---|---|---|---|----|----|----|----|----|----|----|----|----|----|----|----|----|----|----|----|----|----|----|----|----|----|----|----|----|----|----|----|----|----|----|----|----|----|----|----|----|----|----|----|----|----|----|----|----|----|----|----|----|----|----|----|----|----|----|----|----|----|----|----|----|----|----|----|----|----|----|----|----|----|----|----|----|----|----|----|----|----|----|----|----|----|----|----|----|----|----|----|----|----|-----|
| 1 | 2 | 3 | 4 | 5 | 6 | 7 | 8 | 9 | 10 | 11 | 12 | 13 | 14 | 15 | 16 | 17 | 18 | 19 | 20 | 21 | 22 | 23 | 24 | 25 | 26 | 27 | 28 | 29 | 30 | 31 | 32 | 33 | 34 | 35 | 36 | 37 | 38 | 39 | 40 | 41 | 42 | 43 | 44 | 45 | 46 | 47 | 48 | 49 | 50 | 51 | 52 | 53 | 54 | 55 | 56 | 57 | 58 | 59 | 60 | 61 | 62 | 63 | 64 | 65 | 66 | 67 | 68 | 69 | 70 | 71 | 72 | 73 | 74 | 75 | 76 | 77 | 78 | 79 | 80 | 81 | 82 | 83 | 84 | 85 | 86 | 87 | 88 | 89 | 90 | 91 | 92 | 93 | 94 | 95 | 96 | 97 | 98 | 99 | 100 |



| 1 | 2 | 3 | 4 | 5 | 6 | 7 | 8 | 9 | 10 | 11 | 12 | 13 | 14 | 15 | 16 | 17 | 18 | 19 | 20 | 21 | 22 | 23 | 24 | 25 | 26 | 27 | 28 | 29 | 30 | 31 | 32 | 33 | 34 | 35 | 36 | 37 | 38 | 39 | 40 | 41 | 42 | 43 | 44 | 45 | 46 | 47 | 48 | 49 | 50 | 51 | 52 | 53 | 54 | 55 | 56 | 57 | 58 | 59 | 60 | 61 | 62 | 63 | 64 | 65 | 66 | 67 | 68 | 69 | 70 | 71 | 72 | 73 | 74 | 75 | 76 | 77 | 78 | 79 | 80 | 81 | 82 | 83 | 84 | 85 | 86 | 87 | 88 | 89 | 90 | 91 | 92 | 93 | 94 | 95 | 96 | 97 | 98 | 99 | 100 |
|---|---|---|---|---|---|---|---|---|----|----|----|----|----|----|----|----|----|----|----|----|----|----|----|----|----|----|----|----|----|----|----|----|----|----|----|----|----|----|----|----|----|----|----|----|----|----|----|----|----|----|----|----|----|----|----|----|----|----|----|----|----|----|----|----|----|----|----|----|----|----|----|----|----|----|----|----|----|----|----|----|----|----|----|----|----|----|----|----|----|----|----|----|----|----|----|----|----|----|-----|
| 1 | 2 | 3 | 4 | 5 | 6 | 7 | 8 | 9 | 10 | 11 | 12 | 13 | 14 | 15 | 16 | 17 | 18 | 19 | 20 | 21 | 22 | 23 | 24 | 25 | 26 | 27 | 28 | 29 | 30 | 31 | 32 | 33 | 34 | 35 | 36 | 37 | 38 | 39 | 40 | 41 | 42 | 43 | 44 | 45 | 46 | 47 | 48 | 49 | 50 | 51 | 52 | 53 | 54 | 55 | 56 | 57 | 58 | 59 | 60 | 61 | 62 | 63 | 64 | 65 | 66 | 67 | 68 | 69 | 70 | 71 | 72 | 73 | 74 | 75 | 76 | 77 | 78 | 79 | 80 | 81 | 82 | 83 | 84 | 85 | 86 | 87 | 88 | 89 | 90 | 91 | 92 | 93 | 94 | 95 | 96 | 97 | 98 | 99 | 100 |





**Kommunalitäten**

|                                                                                                                                                                                                     | Anfänglich | Extraktion |
|-----------------------------------------------------------------------------------------------------------------------------------------------------------------------------------------------------|------------|------------|
| [ Ich kann mir das Schreiben in sinnvolle Arbeitsschritte unterteilen. ] Um Ihnen die Beantwortung zu erleichtern, können Sie die Antwort in Prozent geben                                          | ,867       | ,746       |
| [ Ich kann meine Ideen auch bei einem komplexen Thema gut organisieren. ] Um Ihnen die Beantwortung zu erleichtern, können Sie die Antwort in Prozent geben                                         | ,832       | ,555       |
| [ Ich kann mich dazu motivieren mit dem Schreiben anzufangen. ] Um Ihnen die Beantwortung zu erleichtern, können Sie die Antwort in Prozent geben                                                   | ,804       | ,513       |
| [ Ich kann mich erst auf den letzten Drücker zum Schreiben motivieren. ] Um Ihnen die Beantwortung zu erleichtern, können Sie die Antwort in Prozent geben                                          | ,778       | ,405       |
| [ Ich kann Probleme, die beim Schreiben auftauchen, überwinden. ] Um Ihnen die Beantwortung zu erleichtern, können Sie die Antwort in Prozent geben                                                 | ,802       | ,511       |
| [ Ich kann mich durch das Vorstellen negativer Konsequenzen des Nichtschreibens zum Weiterschreiben motivieren. ] Um Ihnen die Beantwortung zu erleichtern, können Sie die Antwort in Prozent geben | ,707       | ,144       |
| [ Ich kann mich durch das Vorstellen positiver Konsequenzen zum Weiterschreiben motivieren. ] Um Ihnen die Beantwortung zu erleichtern, können Sie die Antwort in Prozent geben                     | ,833       | ,521       |

**Kommunalitäten**

|                                                                                                                                                                                            | Anfänglich | Extraktion |
|--------------------------------------------------------------------------------------------------------------------------------------------------------------------------------------------|------------|------------|
| [ Ich kann Freude am Schreiben entwickeln. ] Um Ihnen die Beantwortung zu erleichtern, können Sie die Antwort in Prozent geben                                                             | ,882       | ,389       |
| [ Ich kann Interesse für das Schreiben entwickeln. ] Um Ihnen die Beantwortung zu erleichtern, können Sie die Antwort in Prozent geben                                                     | ,863       | ,426       |
| [ Ich kann leicht Wege finden mein Interesse am Schreiben zu steigern. ] Um Ihnen die Beantwortung zu erleichtern, können Sie die Antwort in Prozent geben                                 | ,800       | ,541       |
| [ Ich kann mir beim Schreiben vornehmen, gute Noten durch meine schriftlichen Arbeiten zu erzielen. ] Um Ihnen die Beantwortung zu erleichtern, können Sie die Antwort in Prozent geben    | ,869       | ,460       |
| [ Ich kann mir beim Schreiben vornehmen, durch meine schriftlichen Arbeiten zu zeigen, wie gut ich bin.] Um Ihnen die Beantwortung zu erleichtern, können Sie die Antwort in Prozent geben | ,867       | ,604       |
| [ Ich kann mir vornehmen, durch das Schreiben mein Wissen zu erweitern. ] Um Ihnen die Beantwortung zu erleichtern, können Sie die Antwort in Prozent geben                                | ,887       | ,566       |
| [ Ich kann mir vornehmen, durch das Schreiben zu neuen Erkenntnissen zu gelangen. ] Um Ihnen die Beantwortung zu erleichtern, können Sie die Antwort in Prozent geben                      | ,845       | ,443       |
| [ Ich kann mein Vorgehen beim Schreiben überwachen. ] Um Ihnen die Beantwortung zu erleichtern, können Sie die Antwort in Prozent geben                                                    | ,829       | ,505       |

**Kommunalitäten**

|                                                                                                                                                                                                                          | Anfänglich | Extraktion |
|--------------------------------------------------------------------------------------------------------------------------------------------------------------------------------------------------------------------------|------------|------------|
| <input type="checkbox"/> Ich kann mich beim Schreiben durch lautes Vorlesen von Textstellen unterstützen. ] Um Ihnen die Beantwortung zu erleichtern, können Sie die Antwort in Prozent geben                            | ,589       | ,192       |
| <input type="checkbox"/> Ich kann mich beim Schreiben durch innerliches Vorlesen von bereits geschriebenen Textstellen unterstützen. ] Um Ihnen die Beantwortung zu erleichtern, können Sie die Antwort in Prozent geben | ,722       | ,283       |
| <input type="checkbox"/> Ich kann mir die Dinge, die ich in meinem Text beschreibe, bildlich vorstellen. ] Um Ihnen die Beantwortung zu erleichtern, können Sie die Antwort in Prozent geben                             | ,702       | ,287       |
| <input type="checkbox"/> Ich kann zunächst einen Entwurf meines Textes anfertigen. ] Um Ihnen die Beantwortung zu erleichtern, können Sie die Antwort in Prozent geben                                                   | ,722       | ,296       |
| <input type="checkbox"/> Ich kann mir eine Gliederung erstellen, die mich beim Schreiben unterstützt. ] Um Ihnen die Beantwortung zu erleichtern, können Sie die Antwort in Prozent geben                                | ,789       | ,417       |
| <input type="checkbox"/> Ich kann mich auf das Schreiben konzentrieren. ] Um Ihnen die Beantwortung zu erleichtern, können Sie die Antwort in Prozent geben                                                              | ,908       | ,741       |
| <input type="checkbox"/> Ich kann Ablenkungen beim Schreiben ausblenden. ] Um Ihnen die Beantwortung zu erleichtern, können Sie die Antwort in Prozent geben                                                             | ,831       | ,498       |

**Kommunalitäten**

|                                                                                                                                                                                          | Anfänglich | Extraktion |
|------------------------------------------------------------------------------------------------------------------------------------------------------------------------------------------|------------|------------|
| [ Ich kann mich auf das Schreiben konzentrieren, auch wenn um mich herum viel passiert. ] Um Ihnen die Beantwortung zu erleichtern, können Sie die Antwort in Prozent geben              | ,718       | ,411       |
| [ Ich kann mich auch auf das Schreiben konzentrieren, wenn ich andere Dinge im Kopf habe. ] Um Ihnen die Beantwortung zu erleichtern, können Sie die Antwort in Prozent geben            | ,843       | ,480       |
| [ Ich kann mich wieder auf das Schreiben konzentrieren, wenn ich kurz an etwas anderes gedacht habe. ] Um Ihnen die Beantwortung zu erleichtern, können Sie die Antwort in Prozent geben | ,898       | ,591       |
| [ Ich kann mich wieder auf das Schreiben konzentrieren, wenn ich kurz ablenkt war. ] Um Ihnen die Beantwortung zu erleichtern, können Sie die Antwort in Prozent geben                   | ,857       | ,573       |
| [ Ich kann mich an meine festen Schreibzeiten halten. ] Um Ihnen die Beantwortung zu erleichtern, können Sie die Antwort in Prozent geben                                                | ,777       | ,458       |
| [ Ich kann mir feste Schreibzeiten einplanen. ] Um Ihnen die Beantwortung zu erleichtern, können Sie die Antwort in Prozent geben                                                        | ,825       | ,609       |
| [ Ich kann meine Schreibzeit effektiv nutzen. ] Um Ihnen die Beantwortung zu erleichtern, können Sie die Antwort in Prozent geben                                                        | ,835       | ,617       |
| [ Ich kann meine Texte bis zur Abgabefrist fertigstellen. ] Um Ihnen die Beantwortung zu erleichtern, können Sie die Antwort in Prozent geben                                            | ,768       | ,252       |

**Kommunalitäten**

|                                                                                                                                                                                                                 | Anfänglich | Extraktion |
|-----------------------------------------------------------------------------------------------------------------------------------------------------------------------------------------------------------------|------------|------------|
| <input type="checkbox"/> Ich kann mir meine Zeit so einteilen, dass ich konzentriert an meinem Text arbeite. ] Um Ihnen die Beantwortung zu erleichtern, können Sie die Antwort in Prozent geben                | ,891       | ,656       |
| <input type="checkbox"/> Ich kann, auch wenn viel zu tun ist, Zeit finden, um konzentriert an meinem Text zu arbeiten. ] Um Ihnen die Beantwortung zu erleichtern, können Sie die Antwort in Prozent geben      | ,745       | ,381       |
| <input type="checkbox"/> Ich kann mir meinen Schreibplatz so gestalten, dass ich ungestört schreiben kann. ] Um Ihnen die Beantwortung zu erleichtern, können Sie die Antwort in Prozent geben                  | ,854       | ,454       |
| <input type="checkbox"/> Ich kann mir einen geeigneten Platz zum Schreiben auswählen. ] Um Ihnen die Beantwortung zu erleichtern, können Sie die Antwort in Prozent geben                                       | ,870       | ,402       |
| <input type="checkbox"/> Ich kann mich durch Belohnungen zum Weiterschreiben motivieren. ] Um Ihnen die Beantwortung zu erleichtern, können Sie die Antwort in Prozent geben                                    | ,904       | ,513       |
| <input type="checkbox"/> Ich kann mich beim Schreiben selbst belohnen, indem ich mein Vorankommen protokolliere. ] Um Ihnen die Beantwortung zu erleichtern, können Sie die Antwort in Prozent geben            | ,668       | ,341       |
| <input type="checkbox"/> Ich kann mich beim Schreiben belohnen, indem ich mir bei gutem Vorankommen einen freien Tag gönne. ] Um Ihnen die Beantwortung zu erleichtern, können Sie die Antwort in Prozent geben | ,640       | ,232       |

**Kommunalitäten**

|                                                                                                                                                                                                             | Anfänglich | Extraktion |
|-------------------------------------------------------------------------------------------------------------------------------------------------------------------------------------------------------------|------------|------------|
| <input type="checkbox"/> Ich kann mich beim Schreiben belohnen, indem ich mir schöne Dinge für gutes Vorankommen gönne. ] Um Ihnen die Beantwortung zu erleichtern, können Sie die Antwort in Prozent geben | ,872       | ,425       |
| <input type="checkbox"/> Ich kann mir gezieltes Feedback zu meinen Text einholen. ] Um Ihnen die Beantwortung zu erleichtern, können Sie die Antwort in Prozent geben                                       | ,878       | ,546       |
| <input type="checkbox"/> Ich kann mir zu der Rohfassung meines Textes kritisches Feedback einholen. ] Um Ihnen die Beantwortung zu erleichtern, können Sie die Antwort in Prozent geben                     | ,834       | ,531       |
| <input type="checkbox"/> Ich kann das Feedback Anderer zu meinen Texten umsetzen. ] Um Ihnen die Beantwortung zu erleichtern, können Sie die Antwort in Prozent geben                                       | ,842       | ,512       |
| <input type="checkbox"/> Ich kann mich daran orientieren, welche Strategien KommilitonInnen beim Schreiben einsetzen.] Um Ihnen die Beantwortung zu erleichtern, können Sie die Antwort in Prozent geben    | ,780       | ,240       |
| <input type="checkbox"/> Ich kann mich beim Schreiben selbst beobachten. ] Um Ihnen die Beantwortung zu erleichtern, können Sie die Antwort in Prozent geben                                                | ,735       | ,165       |
| <input type="checkbox"/> Ich kann mein Vorgehen beim Schreiben ändern, wenn ich merke, dass es nicht erfolgreich ist. ] Um Ihnen die Beantwortung zu erleichtern, können Sie die Antwort in Prozent geben   | ,841       | ,616       |

**Kommunalitäten**

|                                                                                                                                                                                               | Anfänglich | Extraktion |
|-----------------------------------------------------------------------------------------------------------------------------------------------------------------------------------------------|------------|------------|
| [ Ich kann meinen Zeitplan für das Schreiben anpassen, wenn ich merke, dass ich ihn nicht einhalten kann. ] Um Ihnen die Beantwortung zu erleichtern, können Sie die Antwort in Prozent geben | ,699       | ,248       |
| [ Ich kann mein Vorankommen beim Schreiben nachvollziehen. ] Um Ihnen die Beantwortung zu erleichtern, können Sie die Antwort in Prozent geben                                                | ,873       | ,608       |
| [ Ich kann mein Vorankommen beim Schreiben durch die Anzahl der geschriebenen Stunden nachvollziehen. ] Um Ihnen die Beantwortung zu erleichtern, können Sie die Antwort in Prozent geben     | ,786       | ,408       |
| [ Ich kann mein Vorankommen beim Schreiben durch die Anzahl der geschriebenen Seiten nachvollziehen. ] Um Ihnen die Beantwortung zu erleichtern, können Sie die Antwort in Prozent geben      | ,724       | ,318       |
| [ Ich kann ausdauernd an meinem Text arbeiten. ] Um Ihnen die Beantwortung zu erleichtern, können Sie die Antwort in Prozent geben                                                            | ,887       | ,599       |
| [ Ich kann mehrere Ideen in einem Text zusammen führen. ] Um Ihnen die Beantwortung zu erleichtern, können Sie die Antwort in Prozent geben                                                   | ,825       | ,580       |
| [ Ich kann eine Schreibblockade lösen und danach weiterschreiben. ] Um Ihnen die Beantwortung zu erleichtern, können Sie die Antwort in Prozent geben                                         | ,742       | ,400       |
| [ Ich kann mich lange Zeit auf das Schreiben konzentrieren, wenn es nötig ist. ] Um Ihnen die Beantwortung zu erleichtern, können Sie die Antwort in Prozent geben                            | ,858       | ,515       |



**Kommunalitäten**

|                                                                                                                                                                                | Anfänglich | Extraktion |
|--------------------------------------------------------------------------------------------------------------------------------------------------------------------------------|------------|------------|
| [ Ich kann die Qualität meines Textes realistisch einschätzen. ]<br>Um Ihnen die Beantwortung zu erleichtern, können Sie die Antwort in Prozent geben                          | ,832       | ,535       |
| [ Ich kann die Anforderungen, die an meinen Text gestellt werden, erfüllen. ] Um Ihnen die Beantwortung zu erleichtern, können Sie die Antwort in Prozent geben                | ,859       | ,599       |
| [ Ich kann die von mir selbst gesetzten Kriterien für die Qualität meiner Texte erreichen. ] Um Ihnen die Beantwortung zu erleichtern, können Sie die Antwort in Prozent geben | ,843       | ,647       |
| [ Ich kann die von mir selbst gesetzten Teilziele beim Schreiben erreichen. ] Um Ihnen die Beantwortung zu erleichtern, können Sie die Antwort in Prozent geben                | ,860       | ,588       |
| [ Ich kann von mir selbst zu hoch gesetzte Ansprüche heruntersetzen. ] Um Ihnen die Beantwortung zu erleichtern, können Sie die Antwort in Prozent geben                       | ,640       | ,153       |
| [ Ich kann meine Texte durch Überarbeitung besser machen. ] Um Ihnen die Beantwortung zu erleichtern, können Sie die Antwort in Prozent geben                                  | ,881       | ,491       |
| [ Ich kann meine Texte durch Überarbeitung verständlicher machen. ] Um Ihnen die Beantwortung zu erleichtern, können Sie die Antwort in Prozent geben                          | ,890       | ,516       |
| [ Ich kann mit der Qualität meiner Texte zufrieden sein. ] Um Ihnen die Beantwortung zu erleichtern, können Sie die Antwort in Prozent geben                                   | ,840       | ,638       |

**Kommunalitäten**

|                                                                                                                                                                      | Anfänglich | Extraktion |
|----------------------------------------------------------------------------------------------------------------------------------------------------------------------|------------|------------|
| [ Ich kann ein gutes Gefühl für das Vorankommen beim Schreiben entwickeln. ] Um Ihnen die Beantwortung zu erleichtern, können Sie die Antwort in Prozent geben       | ,887       | ,648       |
| [ Ich kann die Zeit, die mir zum Schreiben zur Verfügung steht, gut einschätzen. ] Um Ihnen die Beantwortung zu erleichtern, können Sie die Antwort in Prozent geben | ,866       | ,568       |
| [ Ich kann vermeiden, dass ich einen Fehler beim nächsten Mal wieder mache. ] Um Ihnen die Beantwortung zu erleichtern, können Sie die Antwort in Prozent geben      | ,814       | ,560       |
| [ Ich kann aus misslungenen Schreibverfahren lernen. ] Um Ihnen die Beantwortung zu erleichtern, können Sie die Antwort in Prozent geben                             | ,800       | ,450       |
| [ Ich kann mein Vorgehen bei Schreibprojekten durch Erfahrung verbessern. ] Um Ihnen die Beantwortung zu erleichtern, können Sie die Antwort in Prozent geben        | ,789       | ,478       |
| [ Ich kann einschätzen, was ich beim nächsten Mal anders machen muss. ] Um Ihnen die Beantwortung zu erleichtern, können Sie die Antwort in Prozent geben            | ,817       | ,513       |

Extraktionsmethode: Hauptachsen-Faktorenanalyse.



**Erklärte Gesamtvarianz**

| Faktor | Anfängliche Eigenwerte |               | Summen von quadrierten Faktorladungen für Extraktion |               | Rotierte Summe der quadrierten Ladungen <sup>a</sup> |
|--------|------------------------|---------------|------------------------------------------------------|---------------|------------------------------------------------------|
|        | Gesamt                 | % der Varianz | Gesamt                                               | % der Varianz |                                                      |
|        |                        |               |                                                      |               |                                                      |
| 35     | ,394                   | ,563          |                                                      | 91,918        |                                                      |
| 36     | ,367                   | ,524          |                                                      | 92,442        |                                                      |
| 37     | ,349                   | ,499          |                                                      | 92,941        |                                                      |
| 38     | ,344                   | ,491          |                                                      | 93,433        |                                                      |
| 39     | ,335                   | ,479          |                                                      | 93,911        |                                                      |
| 40     | ,308                   | ,440          |                                                      | 94,351        |                                                      |
| 41     | ,302                   | ,431          |                                                      | 94,782        |                                                      |
| 42     | ,272                   | ,389          |                                                      | 95,171        |                                                      |
| 43     | ,269                   | ,384          |                                                      | 95,554        |                                                      |
| 44     | ,251                   | ,359          |                                                      | 95,913        |                                                      |
| 45     | ,244                   | ,348          |                                                      | 96,261        |                                                      |
| 46     | ,222                   | ,317          |                                                      | 96,578        |                                                      |
| 47     | ,209                   | ,299          |                                                      | 96,877        |                                                      |
| 48     | ,205                   | ,293          |                                                      | 97,170        |                                                      |
| 49     | ,183                   | ,262          |                                                      | 97,432        |                                                      |
| 50     | ,158                   | ,226          |                                                      | 97,657        |                                                      |
| 51     | ,152                   | ,217          |                                                      | 97,875        |                                                      |
| 52     | ,148                   | ,212          |                                                      | 98,087        |                                                      |
| 53     | ,138                   | ,198          |                                                      | 98,284        |                                                      |
| 54     | ,120                   | ,171          |                                                      | 98,455        |                                                      |
| 55     | ,116                   | ,165          |                                                      | 98,620        |                                                      |
| 56     | ,107                   | ,153          |                                                      | 98,774        |                                                      |
| 57     | ,105                   | ,150          |                                                      | 98,924        |                                                      |
| 58     | ,095                   | ,136          |                                                      | 99,060        |                                                      |
| 59     | ,084                   | ,119          |                                                      | 99,180        |                                                      |
| 60     | ,079                   | ,113          |                                                      | 99,293        |                                                      |
| 61     | ,071                   | ,101          |                                                      | 99,394        |                                                      |
| 62     | ,068                   | ,098          |                                                      | 99,492        |                                                      |
| 63     | ,065                   | ,092          |                                                      | 99,584        |                                                      |
| 64     | ,059                   | ,084          |                                                      | 99,668        |                                                      |
| 65     | ,054                   | ,078          |                                                      | 99,745        |                                                      |
| 66     | ,046                   | ,066          |                                                      | 99,811        |                                                      |
| 67     | ,045                   | ,064          |                                                      | 99,875        |                                                      |
| 68     | ,032                   | ,046          |                                                      | 99,921        |                                                      |

**Erklärte Gesamtvarianz**

| Faktor | Anfängliche Eigenwerte |               | Summen von quadrierten Faktorladungen für Extraktion |        |               | Rotierte Summe der quadrierten Ladungen <sup>a</sup> |
|--------|------------------------|---------------|------------------------------------------------------|--------|---------------|------------------------------------------------------|
|        | Gesamt                 | % der Varianz | Kumulierte %                                         | Gesamt | % der Varianz |                                                      |
| 69     | ,031                   | ,045          | 99,966                                               |        |               |                                                      |
| 70     | ,024                   | ,034          | 100,000                                              |        |               |                                                      |

Extraktionsmethode: Hauptachsen-Faktorenanalyse.

a. Wenn Faktoren korreliert sind, können die Summen der quadrierten Ladungen nicht addiert werden, um eine Gesamtvarianz zu erhalten.

**Screepplot**

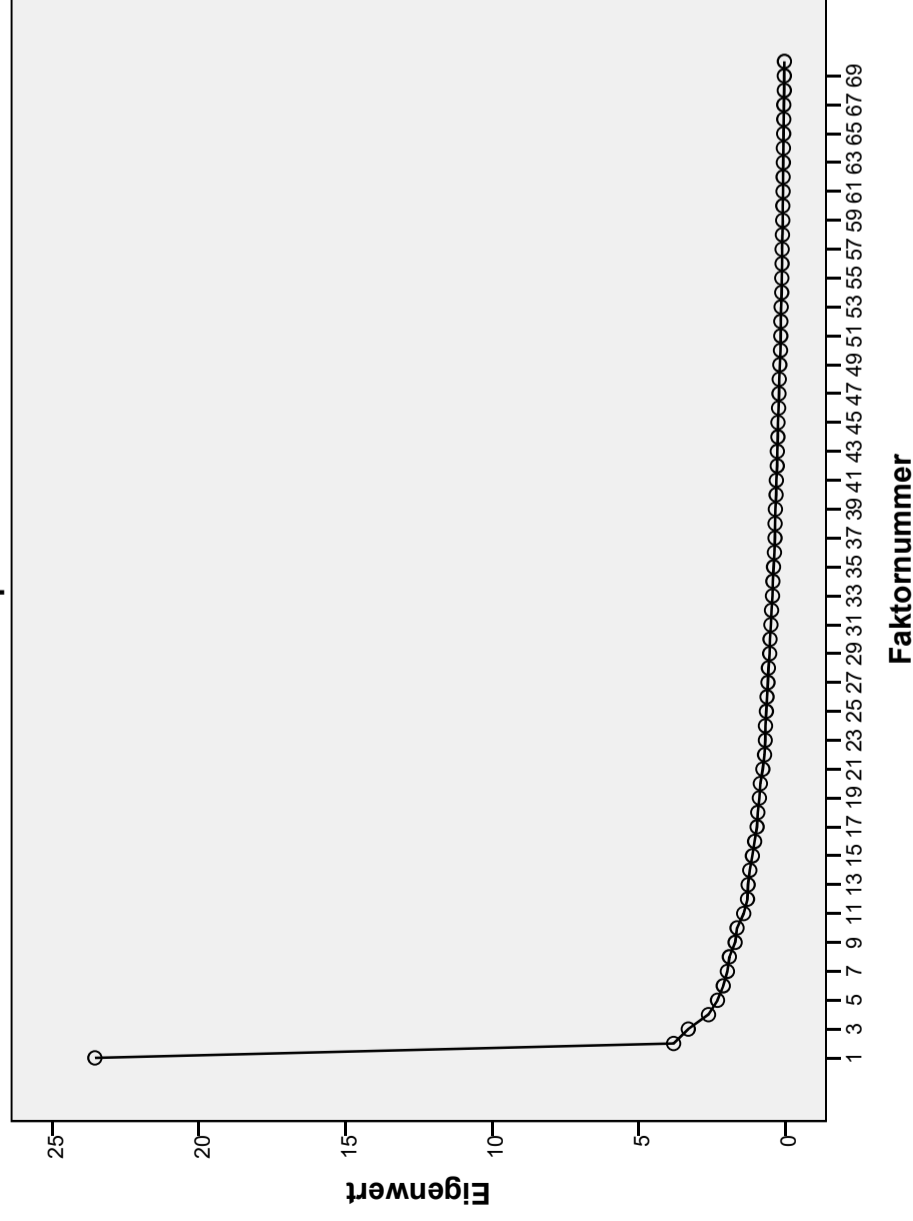

Faktorenmatrix<sup>a</sup>

|                                                                                                                                                                                                                 | Faktor |       |       |       |       |
|-----------------------------------------------------------------------------------------------------------------------------------------------------------------------------------------------------------------|--------|-------|-------|-------|-------|
|                                                                                                                                                                                                                 | 1      | 2     | 3     | 4     | 5     |
| [ Ich kann die Anforderungen unterschiedlicher Textsorten (wie z. B. Hausarbeit, Protokoll, Critical Paper, usw.) verstehen.] Um Ihnen die Beantwortung zu erleichtern, können Sie die Antwort in Prozent geben | ,385   | -,238 | -,204 | -,068 | ,128  |
| [ Ich kann mir konkrete Schreibziele setzen. ] Um Ihnen die Beantwortung zu erleichtern, können Sie die Antwort in Prozent geben                                                                                | ,621   | ,037  | ,385  | -,194 | -,026 |
| [ Ich kann mein Schreibprojekt in kleinere Schreibziele unterteilen. ] Um Ihnen die Beantwortung zu erleichtern, können Sie die Antwort in Prozent geben                                                        | ,595   | -,086 | ,308  | -,284 | -,062 |
| [ Ich kann meine Ideen für meinen Text vor dem Schreiben strukturieren. ] Um Ihnen die Beantwortung zu erleichtern, können Sie die Antwort in Prozent geben                                                     | ,549   | -,256 | ,043  | -,359 | -,159 |
| [ Ich kann mir das Schreiben in sinnvolle Arbeitsschritte unterteilen. ] Um Ihnen die Beantwortung zu erleichtern, können Sie die Antwort in Prozent geben                                                      | ,700   | -,266 | ,253  | -,292 | -,191 |
| [ Ich kann meine Ideen auch bei einem komplexen Thema gut organisieren. ] Um Ihnen die Beantwortung zu erleichtern, können Sie die Antwort in Prozent geben                                                     | ,616   | -,277 | -,069 | -,265 | -,153 |
| [ Ich kann mich dazu motivieren mit dem Schreiben anzufangen. ] Um Ihnen die Beantwortung zu erleichtern, können Sie die Antwort in Prozent geben                                                               | ,507   | ,306  | ,052  | ,106  | -,384 |

Faktorenmatrix<sup>a</sup>

|                                                                                                                                                                                                     | Faktor |       |       |       |       |
|-----------------------------------------------------------------------------------------------------------------------------------------------------------------------------------------------------|--------|-------|-------|-------|-------|
|                                                                                                                                                                                                     | 1      | 2     | 3     | 4     | 5     |
| [ Ich kann mich erst auf den letzten Drücker zum Schreiben motivieren. ] Um Ihnen die Beantwortung zu erleichtern, können Sie die Antwort in Prozent geben                                          | ,339   | ,285  | ,175  | -,057 | -,418 |
| [ Ich kann Probleme, die beim Schreiben auftauchen, überwinden. ] Um Ihnen die Beantwortung zu erleichtern, können Sie die Antwort in Prozent geben                                                 | ,640   | -,249 | -,170 | -,015 | -,101 |
| [ Ich kann mich durch das Vorstellen negativer Konsequenzen des Nichtschreibens zum Weiterschreiben motivieren. ] Um Ihnen die Beantwortung zu erleichtern, können Sie die Antwort in Prozent geben | ,201   | ,235  | ,135  | -,058 | ,166  |
| [ Ich kann mich durch das Vorstellen positiver Konsequenzen zum Weiterschreiben motivieren. ] Um Ihnen die Beantwortung zu erleichtern, können Sie die Antwort in Prozent geben                     | ,555   | ,374  | ,058  | -,202 | ,170  |
| [ Ich kann Freude am Schreiben entwickeln. ] Um Ihnen die Beantwortung zu erleichtern, können Sie die Antwort in Prozent geben                                                                      | ,531   | ,258  | -,149 | ,013  | -,134 |
| [ Ich kann Interesse für das Schreiben entwickeln. ] Um Ihnen die Beantwortung zu erleichtern, können Sie die Antwort in Prozent geben                                                              | ,603   | ,197  | -,152 | -,023 | -,016 |
| [ Ich kann leicht Wege finden mein Interesse am Schreiben zu steigern. ] Um Ihnen die Beantwortung zu erleichtern, können Sie die Antwort in Prozent geben                                          | ,632   | ,306  | -,050 | -,175 | -,121 |

Faktorenmatrix<sup>a</sup>

|                                                                                                                                                                                                   | Faktor |       |       |       |      |
|---------------------------------------------------------------------------------------------------------------------------------------------------------------------------------------------------|--------|-------|-------|-------|------|
|                                                                                                                                                                                                   | 1      | 2     | 3     | 4     | 5    |
| [ Ich kann mir beim Schreiben vornehmen, gute Noten durch meine schriftlichen Arbeiten zu erzielen. ] Um Ihnen die Beantwortung zu erleichtern, können Sie die Antwort in Prozent geben           | ,504   | ,031  | -,288 | -,345 | ,050 |
| [ Ich kann mir beim Schreiben vornehmen, durch meine schriftlichen Arbeiten zu zeigen, wie gut ich bin.] Um Ihnen die Beantwortung zu erleichtern, können Sie die Antwort in Prozent geben        | ,637   | ,009  | -,310 | -,291 | ,131 |
| [ Ich kann mir vornehmen, durch das Schreiben mein Wissen zu erweitern. ] Um Ihnen die Beantwortung zu erleichtern, können Sie die Antwort in Prozent geben                                       | ,602   | ,352  | -,235 | -,033 | ,153 |
| [ Ich kann mir vornehmen, durch das Schreiben zu neuen Erkenntnissen zu gelangen. ] Um Ihnen die Beantwortung zu erleichtern, können Sie die Antwort in Prozent geben                             | ,512   | ,308  | -,265 | ,026  | ,123 |
| [ Ich kann mein Vorgehen beim Schreiben überwachen. ] Um Ihnen die Beantwortung zu erleichtern, können Sie die Antwort in Prozent geben                                                           | ,672   | -,051 | -,137 | -,035 | ,176 |
| [ Ich kann mich beim Schreiben durch lautes Vorlesen von Textstellen unterstützen. ] Um Ihnen die Beantwortung zu erleichtern, können Sie die Antwort in Prozent geben                            | ,258   | ,182  | -,155 | -,010 | ,261 |
| [ Ich kann mich beim Schreiben durch innerliches Vorlesen von bereits geschriebenen Textstellen unterstützen. ] Um Ihnen die Beantwortung zu erleichtern, können Sie die Antwort in Prozent geben | ,492   | ,083  | -,078 | ,167  | ,023 |



Faktorenmatrix<sup>a</sup>

|                                                                                                                                                                               | Faktor |       |       |       |       |
|-------------------------------------------------------------------------------------------------------------------------------------------------------------------------------|--------|-------|-------|-------|-------|
|                                                                                                                                                                               | 1      | 2     | 3     | 4     | 5     |
| [ Ich kann mir die Dinge, die ich in meinem Text beschreibe, bildlich vorstellen. ] Um Ihnen die Beantwortung zu erleichtern, können Sie die Antwort in Prozent geben         | ,451   | -,078 | -,223 | -,113 | ,123  |
| [ Ich kann zunächst einen Entwurf meines Textes anfertigen. ] Um Ihnen die Beantwortung zu erleichtern, können Sie die Antwort in Prozent geben                               | ,447   | -,136 | ,098  | -,200 | ,167  |
| [ Ich kann mir eine Gliederung erstellen, die mich beim Schreiben unterstützt. ] Um Ihnen die Beantwortung zu erleichtern, können Sie die Antwort in Prozent geben            | ,534   | -,226 | ,037  | -,268 | -,083 |
| [ Ich kann mich auf das Schreiben konzentrieren. ] Um Ihnen die Beantwortung zu erleichtern, können Sie die Antwort in Prozent geben                                          | ,807   | ,124  | -,200 | ,132  | -,132 |
| [ Ich kann Ablenkungen beim Schreiben ausblenden. ] Um Ihnen die Beantwortung zu erleichtern, können Sie die Antwort in Prozent geben                                         | ,499   | ,162  | -,352 | ,293  | -,110 |
| [ Ich kann mich auf das Schreiben konzentrieren, auch wenn um mich herum viel passiert. ] Um Ihnen die Beantwortung zu erleichtern, können Sie die Antwort in Prozent geben   | ,373   | ,102  | -,412 | ,285  | ,096  |
| [ Ich kann mich auch auf das Schreiben konzentrieren, wenn ich andere Dinge im Kopf habe. ] Um Ihnen die Beantwortung zu erleichtern, können Sie die Antwort in Prozent geben | ,539   | ,210  | -,271 | ,242  | -,120 |

Faktorenmatrix<sup>a</sup>

|                                                                                                                                                                                          | Faktor |       |       |       |       |
|------------------------------------------------------------------------------------------------------------------------------------------------------------------------------------------|--------|-------|-------|-------|-------|
|                                                                                                                                                                                          | 1      | 2     | 3     | 4     | 5     |
| [ Ich kann mich wieder auf das Schreiben konzentrieren, wenn ich kurz an etwas anderes gedacht habe. ] Um Ihnen die Beantwortung zu erleichtern, können Sie die Antwort in Prozent geben | ,667   | ,182  | -,130 | ,246  | -,189 |
| [ Ich kann mich wieder auf das Schreiben konzentrieren, wenn ich kurz ablenkt war. ] Um Ihnen die Beantwortung zu erleichtern, können Sie die Antwort in Prozent geben                   | ,626   | ,192  | -,179 | ,222  | -,249 |
| [ Ich kann mich an meine festen Schreibzeiten halten. ] Um Ihnen die Beantwortung zu erleichtern, können Sie die Antwort in Prozent geben                                                | ,554   | ,264  | ,231  | -,112 | ,124  |
| [ Ich kann mir feste Schreibzeiten einplanen. ] Um Ihnen die Beantwortung zu erleichtern, können Sie die Antwort in Prozent geben                                                        | ,474   | ,347  | ,353  | -,259 | ,267  |
| [ Ich kann meine Schreibzeit effektiv nutzen. ] Um Ihnen die Beantwortung zu erleichtern, können Sie die Antwort in Prozent geben                                                        | ,758   | -,057 | ,140  | ,005  | -,139 |
| [ Ich kann meine Texte bis zur Abgabefrist fertigstellen. ] Um Ihnen die Beantwortung zu erleichtern, können Sie die Antwort in Prozent geben                                            | ,427   | -,135 | ,110  | ,164  | -,111 |
| [ Ich kann mir meine Zeit so einteilen, dass ich konzentriert an meinem Text arbeite. ] Um Ihnen die Beantwortung zu erleichtern, können Sie die Antwort in Prozent geben                | ,785   | ,059  | ,132  | -,020 | -,137 |
| [ Ich kann, auch wenn viel zu tun ist, Zeit finden, um konzentriert an meinem Text zu arbeiten. ] Um Ihnen die Beantwortung zu erleichtern, können Sie die Antwort in Prozent geben      | ,615   | ,016  | ,037  | ,018  | -,024 |

Faktorenmatrix<sup>a</sup>

|                                                                                                                                                                                          | Faktor |       |      |       |       |
|------------------------------------------------------------------------------------------------------------------------------------------------------------------------------------------|--------|-------|------|-------|-------|
|                                                                                                                                                                                          | 1      | 2     | 3    | 4     | 5     |
| [ Ich kann mir meinen Schreibplatz so gestalten, dass ich ungestört schreiben kann. ] Um Ihnen die Beantwortung zu erleichtern, können Sie die Antwort in Prozent geben                  | ,638   | ,190  | ,019 | ,102  | -,023 |
| [ Ich kann mir einen geeigneten Platz zum Schreiben auswählen. ] Um Ihnen die Beantwortung zu erleichtern, können Sie die Antwort in Prozent geben                                       | ,565   | -,024 | ,197 | ,198  | -,059 |
| [ Ich kann mich durch Belohnungen zum Weiterschreiben motivieren. ] Um Ihnen die Beantwortung zu erleichtern, können Sie die Antwort in Prozent geben                                    | ,529   | ,337  | ,322 | -,095 | -,083 |
| [ Ich kann mich beim Schreiben selbst belohnen, indem ich mein Vorankommen protokolliere. ] Um Ihnen die Beantwortung zu erleichtern, können Sie die Antwort in Prozent geben            | ,311   | ,362  | ,257 | -,004 | ,217  |
| [ Ich kann mich beim Schreiben belohnen, indem ich mir bei gutem Vorankommen einen freien Tag gönne. ] Um Ihnen die Beantwortung zu erleichtern, können Sie die Antwort in Prozent geben | ,394   | ,239  | ,098 | -,061 | -,081 |
| [ Ich kann mich beim Schreiben belohnen, indem ich mir schöne Dinge für gutes Vorankommen gönne. ] Um Ihnen die Beantwortung zu erleichtern, können Sie die Antwort in Prozent geben     | ,447   | ,269  | ,305 | -,145 | -,198 |
| [ Ich kann mir gezieltes Feedback zu meinen Text einholen. ] Um Ihnen die Beantwortung zu erleichtern, können Sie die Antwort in Prozent geben                                           | ,354   | -,215 | ,372 | ,470  | ,120  |

Faktorenmatrix<sup>a</sup>

|                                                                                                                                                                                               | Faktor |       |      |      |      |
|-----------------------------------------------------------------------------------------------------------------------------------------------------------------------------------------------|--------|-------|------|------|------|
|                                                                                                                                                                                               | 1      | 2     | 3    | 4    | 5    |
| [ Ich kann mir zu der Rohfassung meines Textes kritisches Feedback einholen. ] Um Ihnen die Beantwortung zu erleichtern, können Sie die Antwort in Prozent geben                              | ,306   | -,266 | ,384 | ,466 | ,044 |
| [ Ich kann das Feedback Anderer zu meinen Texten umsetzen. ] Um Ihnen die Beantwortung zu erleichtern, können Sie die Antwort in Prozent geben                                                | ,425   | -,214 | ,406 | ,344 | ,043 |
| [ Ich kann mich daran orientieren, welche Strategien KommilitonInnen beim Schreiben einsetzen.] Um Ihnen die Beantwortung zu erleichtern, können Sie die Antwort in Prozent geben             | ,191   | ,212  | ,197 | ,113 | ,328 |
| [ Ich kann mich beim Schreiben selbst beobachten. ] Um Ihnen die Beantwortung zu erleichtern, können Sie die Antwort in Prozent geben                                                         | ,302   | ,143  | ,019 | ,040 | ,227 |
| [ Ich kann mein Vorgehen beim Schreiben ändern, wenn ich merke, dass es nicht erfolgreich ist. ] Um Ihnen die Beantwortung zu erleichtern, können Sie die Antwort in Prozent geben            | ,761   | -,160 | ,018 | ,024 | ,099 |
| [ Ich kann meinen Zeitplan für das Schreiben anpassen, wenn ich merke, dass ich ihn nicht einhalten kann. ] Um Ihnen die Beantwortung zu erleichtern, können Sie die Antwort in Prozent geben | ,409   | -,148 | ,199 | ,105 | ,090 |
| [ Ich kann mein Vorankommen beim Schreiben nachvollziehen. ] Um Ihnen die Beantwortung zu erleichtern, können Sie die Antwort in Prozent geben                                                | ,748   | -,193 | ,053 | ,075 | ,051 |

Faktorenmatrix<sup>a</sup>

|                                                                                                                                                                                           | Faktor |       |       |       |       |
|-------------------------------------------------------------------------------------------------------------------------------------------------------------------------------------------|--------|-------|-------|-------|-------|
|                                                                                                                                                                                           | 1      | 2     | 3     | 4     | 5     |
| [ Ich kann mein Vorankommen beim Schreiben durch die Anzahl der geschriebenen Stunden nachvollziehen. ] Um Ihnen die Beantwortung zu erleichtern, können Sie die Antwort in Prozent geben | ,383   | ,305  | -,011 | ,013  | ,409  |
| [ Ich kann mein Vorankommen beim Schreiben durch die Anzahl der geschriebenen Seiten nachvollziehen. ] Um Ihnen die Beantwortung zu erleichtern, können Sie die Antwort in Prozent geben  | ,534   | ,066  | ,057  | ,135  | ,086  |
| [ Ich kann ausdauernd an meinem Text arbeiten. ] Um Ihnen die Beantwortung zu erleichtern, können Sie die Antwort in Prozent geben                                                        | ,725   | ,121  | -,186 | ,150  | -,048 |
| [ Ich kann mehrere Ideen in einem Text zusammen führen. ] Um Ihnen die Beantwortung zu erleichtern, können Sie die Antwort in Prozent geben                                               | ,656   | -,359 | -,146 | -,003 | ,000  |
| [ Ich kann eine Schreibblockade lösen und danach weiterschreiben. ] Um Ihnen die Beantwortung zu erleichtern, können Sie die Antwort in Prozent geben                                     | ,619   | -,042 | ,011  | ,096  | -,077 |
| [ Ich kann mich lange Zeit auf das Schreiben konzentrieren, wenn es nötig ist. ] Um Ihnen die Beantwortung zu erleichtern, können Sie die Antwort in Prozent geben                        | ,682   | ,086  | -,160 | ,075  | -,103 |
| [ Ich kann die Qualität meines Textes realistisch einschätzen. ] Um Ihnen die Beantwortung zu erleichtern, können Sie die Antwort in Prozent geben                                        | ,612   | -,345 | -,105 | -,149 | ,087  |

Faktorenmatrix<sup>a</sup>

|                                                                                                                                                                                | Faktor |       |       |       |       |
|--------------------------------------------------------------------------------------------------------------------------------------------------------------------------------|--------|-------|-------|-------|-------|
|                                                                                                                                                                                | 1      | 2     | 3     | 4     | 5     |
| [ Ich kann die Anforderungen, die an meinen Text gestellt werden, erfüllen. ] Um Ihnen die Beantwortung zu erleichtern, können Sie die Antwort in Prozent geben                | ,637   | -,381 | -,211 | -,044 | -,029 |
| [ Ich kann die von mir selbst gesetzten Kriterien für die Qualität meiner Texte erreichen. ] Um Ihnen die Beantwortung zu erleichtern, können Sie die Antwort in Prozent geben | ,770   | -,170 | -,136 | ,026  | -,083 |
| [ Ich kann die von mir selbst gesetzten Teilziele beim Schreiben erreichen. ] Um Ihnen die Beantwortung zu erleichtern, können Sie die Antwort in Prozent geben                | ,748   | -,007 | ,138  | -,007 | -,096 |
| [ Ich kann von mir selbst zu hoch gesetzte Ansprüche heruntersetzen.] Um Ihnen die Beantwortung zu erleichtern, können Sie die Antwort in Prozent geben                        | ,276   | -,148 | ,184  | ,137  | ,048  |
| [ Ich kann meine Texte durch Überarbeitung besser machen. ] Um Ihnen die Beantwortung zu erleichtern, können Sie die Antwort in Prozent geben                                  | ,599   | -,301 | -,033 | ,106  | ,172  |
| [ Ich kann meine Texte durch Überarbeitung verständlicher machen. ] Um Ihnen die Beantwortung zu erleichtern, können Sie die Antwort in Prozent geben                          | ,579   | -,378 | ,094  | ,028  | ,170  |
| [ Ich kann mit der Qualität meiner Texte zufrieden sein. ] Um Ihnen die Beantwortung zu erleichtern, können Sie die Antwort in Prozent geben                                   | ,698   | -,340 | -,183 | -,034 | ,035  |

Faktorenmatrix<sup>a</sup>

|                                                                                                                                                                      | Faktor |       |       |       |       |
|----------------------------------------------------------------------------------------------------------------------------------------------------------------------|--------|-------|-------|-------|-------|
|                                                                                                                                                                      | 1      | 2     | 3     | 4     | 5     |
| [ Ich kann ein gutes Gefühl für das Vorankommen beim Schreiben entwickeln. ] Um Ihnen die Beantwortung zu erleichtern, können Sie die Antwort in Prozent geben       | ,800   | ,008  | ,085  | -,016 | ,019  |
| [ Ich kann die Zeit, die mir zum Schreiben zur Verfügung steht, gut einschätzen. ] Um Ihnen die Beantwortung zu erleichtern, können Sie die Antwort in Prozent geben | ,708   | -,008 | ,230  | ,062  | -,096 |
| [ Ich kann vermeiden, dass ich einen Fehler beim nächsten Mal wieder mache. ] Um Ihnen die Beantwortung zu erleichtern, können Sie die Antwort in Prozent geben      | ,713   | -,070 | -,167 | -,041 | ,131  |
| [ Ich kann aus misslungenen Schreibverfahren lernen. ] Um Ihnen die Beantwortung zu erleichtern, können Sie die Antwort in Prozent geben                             | ,622   | ,032  | ,125  | ,038  | ,214  |
| [ Ich kann mein Vorgehen bei Schreibprojekten durch Erfahrung verbessern. ] Um Ihnen die Beantwortung zu erleichtern, können Sie die Antwort in Prozent geben        | ,685   | -,072 | ,019  | -,019 | ,043  |
| [ Ich kann einschätzen, was ich beim nächsten Mal anders machen muss. ] Um Ihnen die Beantwortung zu erleichtern, können Sie die Antwort in Prozent geben            | ,657   | -,090 | -,075 | ,114  | ,233  |

Extraktionsmethode: Hauptachsenfaktorenanalyse.

a. 5 Faktoren extrahiert. Es werden 6 Iterationen benötigt.











Mustermatrix<sup>a</sup>

|                                                                                                                                                                                                     | Faktor |       |       |       |       |
|-----------------------------------------------------------------------------------------------------------------------------------------------------------------------------------------------------|--------|-------|-------|-------|-------|
|                                                                                                                                                                                                     | 1      | 2     | 3     | 4     | 5     |
| [ Ich kann mir das Schreiben in sinnvolle Arbeitsschritte unterteilen. ] Um Ihnen die Beantwortung zu erleichtern, können Sie die Antwort in Prozent geben                                          | ,735   | -,300 | ,453  | ,041  | -,160 |
| [ Ich kann meine Ideen auch bei einem komplexen Thema gut organisieren. ] Um Ihnen die Beantwortung zu erleichtern, können Sie die Antwort in Prozent geben                                         | ,828   | -,060 | ,183  | -,141 | -,235 |
| [ Ich kann mich dazu motivieren mit dem Schreiben anzufangen. ] Um Ihnen die Beantwortung zu erleichtern, können Sie die Antwort in Prozent geben                                                   | -,285  | ,497  | ,629  | ,000  | -,152 |
| [ Ich kann mich erst auf den letzten Drücker zum Schreiben motivieren. ] Um Ihnen die Beantwortung zu erleichtern, können Sie die Antwort in Prozent geben                                          | -,262  | ,220  | ,751  | -,084 | -,167 |
| [ Ich kann Probleme, die beim Schreiben auftauchen, überwinden. ] Um Ihnen die Beantwortung zu erleichtern, können Sie die Antwort in Prozent geben                                                 | ,647   | ,223  | -,003 | ,020  | -,221 |
| [ Ich kann mich durch das Vorstellen negativer Konsequenzen des Nichtschreibens zum Weiterschreiben motivieren. ] Um Ihnen die Beantwortung zu erleichtern, können Sie die Antwort in Prozent geben | -,130  | -,042 | ,118  | ,007  | ,388  |
| [ Ich kann mich durch das Vorstellen positiver Konsequenzen zum Weiterschreiben motivieren. ] Um Ihnen die Beantwortung zu erleichtern, können Sie die Antwort in Prozent geben                     | ,050   | ,079  | ,270  | -,182 | ,519  |

Mustermatrix<sup>a</sup>

|                                                                                                                                                                                             | Faktor |      |       |       |      |
|---------------------------------------------------------------------------------------------------------------------------------------------------------------------------------------------|--------|------|-------|-------|------|
|                                                                                                                                                                                             | 1      | 2    | 3     | 4     | 5    |
| [ Ich kann Freude am Schreiben entwickeln. ] Um Ihnen die Beantwortung zu erleichtern, können Sie die Antwort in Prozent geben                                                              | ,002   | ,471 | ,279  | -,144 | ,039 |
| [ Ich kann Interesse für das Schreiben entwickeln. ] Um Ihnen die Beantwortung zu erleichtern, können Sie die Antwort in Prozent geben                                                      | ,161   | ,388 | ,162  | -,124 | ,139 |
| [ Ich kann leicht Wege finden mein Interesse am Schreiben zu steigern. ] Um Ihnen die Beantwortung zu erleichtern, können Sie die Antwort in Prozent geben                                  | ,121   | ,289 | ,447  | -,251 | ,147 |
| [ Ich kann mir beim Schreiben vornehmen, gute Noten durch meine schriftlichen Arbeiten zu erzielen. ] Um Ihnen die Beantwortung zu erleichtern, können Sie die Antwort in Prozent geben     | ,645   | ,102 | ,025  | -,439 | ,097 |
| [ Ich kann mir beim Schreiben vornehmen, durch meine schriftlichen Arbeiten zu zeigen, wie gut ich bin. ] Um Ihnen die Beantwortung zu erleichtern, können Sie die Antwort in Prozent geben | ,714   | ,159 | -,069 | -,366 | ,174 |
| [ Ich kann mir vornehmen, durch das Schreiben mein Wissen zu erweitern. ] Um Ihnen die Beantwortung zu erleichtern, können Sie die Antwort in Prozent geben                                 | ,072   | ,462 | ,038  | -,209 | ,388 |
| [ Ich kann mir vornehmen, durch das Schreiben zu neuen Erkenntnissen zu gelangen. ] Um Ihnen die Beantwortung zu erleichtern, können Sie die Antwort in Prozent geben                       | ,031   | ,496 | -,017 | -,178 | ,301 |

Mustermatrix<sup>a</sup>

|                                                                                                                                                                                                                          | Faktor |       |       |       |       |
|--------------------------------------------------------------------------------------------------------------------------------------------------------------------------------------------------------------------------|--------|-------|-------|-------|-------|
|                                                                                                                                                                                                                          | 1      | 2     | 3     | 4     | 5     |
| <input type="checkbox"/> Ich kann mein Vorgehen beim Schreiben überwachen. ] Um Ihnen die Beantwortung zu erleichtern, können Sie die Antwort in Prozent geben                                                           | ,510   | ,184  | -,123 | ,009  | ,206  |
| <input type="checkbox"/> Ich kann mich beim Schreiben durch lautes Vorlesen von Textstellen unterstützen. ] Um Ihnen die Beantwortung zu erleichtern, können Sie die Antwort in Prozent geben                            | ,059   | ,185  | -,187 | -,095 | ,374  |
| <input type="checkbox"/> Ich kann mich beim Schreiben durch innerliches Vorlesen von bereits geschriebenen Textstellen unterstützen. ] Um Ihnen die Beantwortung zu erleichtern, können Sie die Antwort in Prozent geben | ,043   | ,373  | ,016  | ,129  | ,095  |
| <input type="checkbox"/> Ich kann mir die Dinge, die ich in meinem Text beschreibe, bildlich vorstellen. ] Um Ihnen die Beantwortung zu erleichtern, können Sie die Antwort in Prozent geben                             | ,525   | ,134  | -,160 | -,141 | ,091  |
| <input type="checkbox"/> Ich kann zunächst einen Entwurf meines Textes anfertigen. ] Um Ihnen die Beantwortung zu erleichtern, können Sie die Antwort in Prozent geben                                                   | ,533   | -,244 | ,000  | ,018  | ,206  |
| <input type="checkbox"/> Ich kann mir eine Gliederung erstellen, die mich beim Schreiben unterstützt. ] Um Ihnen die Beantwortung zu erleichtern, können Sie die Antwort in Prozent geben                                | ,704   | -,173 | ,195  | -,089 | -,110 |
| <input type="checkbox"/> Ich kann mich auf das Schreiben konzentrieren. ] Um Ihnen die Beantwortung zu erleichtern, können Sie die Antwort in Prozent geben                                                              | ,201   | ,617  | ,188  | ,010  | -,034 |

Mustermatrix<sup>a</sup>

|                                                                                                                                                                                          | Faktor |       |       |       |       |
|------------------------------------------------------------------------------------------------------------------------------------------------------------------------------------------|--------|-------|-------|-------|-------|
|                                                                                                                                                                                          | 1      | 2     | 3     | 4     | 5     |
| [ Ich kann Ablenkungen beim Schreiben ausblenden. ] Um Ihnen die Beantwortung zu erleichtern, können Sie die Antwort in Prozent geben                                                    | -,061  | ,792  | -,032 | ,011  | -,092 |
| [ Ich kann mich auf das Schreiben konzentrieren, auch wenn um mich herum viel passiert. ] Um Ihnen die Beantwortung zu erleichtern, können Sie die Antwort in Prozent geben              | ,020   | ,687  | -,321 | ,013  | ,056  |
| [ Ich kann mich auch auf das Schreiben konzentrieren, wenn ich andere Dinge im Kopf habe. ] Um Ihnen die Beantwortung zu erleichtern, können Sie die Antwort in Prozent geben            | -,086  | ,724  | ,081  | ,003  | -,038 |
| [ Ich kann mich wieder auf das Schreiben konzentrieren, wenn ich kurz an etwas anderes gedacht habe. ] Um Ihnen die Beantwortung zu erleichtern, können Sie die Antwort in Prozent geben | -,073  | ,663  | ,246  | ,109  | -,071 |
| [ Ich kann mich wieder auf das Schreiben konzentrieren, wenn ich kurz ablenkt war. ] Um Ihnen die Beantwortung zu erleichtern, können Sie die Antwort in Prozent geben                   | -,074  | ,701  | ,277  | ,035  | -,145 |
| [ Ich kann mich an meine festen Schreibzeiten halten. ] Um Ihnen die Beantwortung zu erleichtern, können Sie die Antwort in Prozent geben                                                | ,007   | -,029 | ,329  | ,042  | ,442  |
| [ Ich kann mir feste Schreibzeiten einplanen. ] Um Ihnen die Beantwortung zu erleichtern, können Sie die Antwort in Prozent geben                                                        | -,016  | -,281 | ,352  | -,022 | ,687  |
| [ Ich kann meine Schreibzeit effektiv nutzen. ] Um Ihnen die Beantwortung zu erleichtern, können Sie die Antwort in Prozent geben                                                        | ,337   | ,134  | ,348  | ,175  | -,042 |

**Mustermatrix<sup>a</sup>**

|                                                                                                                                                                                                            | Faktor |       |      |      |       |
|------------------------------------------------------------------------------------------------------------------------------------------------------------------------------------------------------------|--------|-------|------|------|-------|
|                                                                                                                                                                                                            | 1      | 2     | 3    | 4    | 5     |
| <input type="checkbox"/> Ich kann meine Texte bis zur Abgabefrist fertigstellen. ] Um Ihnen die Beantwortung zu erleichtern, können Sie die Antwort in Prozent geben                                       | ,142   | ,138  | ,131 | ,294 | -,131 |
| <input type="checkbox"/> Ich kann mir meine Zeit so einteilen, dass ich konzentriert an meinem Text arbeite. ] Um Ihnen die Beantwortung zu erleichtern, können Sie die Antwort in Prozent geben           | ,249   | ,188  | ,419 | ,109 | ,034  |
| <input type="checkbox"/> Ich kann, auch wenn viel zu tun ist, Zeit finden, um konzentriert an meinem Text zu arbeiten. ] Um Ihnen die Beantwortung zu erleichtern, können Sie die Antwort in Prozent geben | ,246   | ,180  | ,179 | ,100 | ,072  |
| <input type="checkbox"/> Ich kann mir meinen Schreibplatz so gestalten, dass ich ungestört schreiben kann. ] Um Ihnen die Beantwortung zu erleichtern, können Sie die Antwort in Prozent geben             | ,003   | ,357  | ,234 | ,103 | ,166  |
| <input type="checkbox"/> Ich kann mir einen geeigneten Platz zum Schreiben auswählen. ] Um Ihnen die Beantwortung zu erleichtern, können Sie die Antwort in Prozent geben                                  | ,032   | ,172  | ,213 | ,367 | ,029  |
| <input type="checkbox"/> Ich kann mich durch Belohnungen zum Weiterschreiben motivieren. ] Um Ihnen die Beantwortung zu erleichtern, können Sie die Antwort in Prozent geben                               | -,183  | ,021  | ,609 | ,046 | ,289  |
| <input type="checkbox"/> Ich kann mich beim Schreiben selbst belohnen, indem ich mein Vorankommen protokolliere. ] Um Ihnen die Beantwortung zu erleichtern, können Sie die Antwort in Prozent geben       | -,303  | -,020 | ,218 | ,110 | ,562  |



Mustermatrix<sup>a</sup>

|                                                                                                                                                                                          | Faktor |       |       |       |       |
|------------------------------------------------------------------------------------------------------------------------------------------------------------------------------------------|--------|-------|-------|-------|-------|
|                                                                                                                                                                                          | 1      | 2     | 3     | 4     | 5     |
| [ Ich kann mich beim Schreiben belohnen, indem ich mir bei gutem Vorankommen einen freien Tag gönne. ] Um Ihnen die Beantwortung zu erleichtern, können Sie die Antwort in Prozent geben | -,075  | ,140  | ,373  | -,048 | ,145  |
| [ Ich kann mich beim Schreiben belohnen, indem ich mir schöne Dinge für gutes Vorankommen gönne. ] Um Ihnen die Beantwortung zu erleichtern, können Sie die Antwort in Prozent geben     | -,123  | -,019 | ,672  | -,018 | ,118  |
| [ Ich kann mir gezieltes Feedback zu meinen Text einholen. ] Um Ihnen die Beantwortung zu erleichtern, können Sie die Antwort in Prozent geben                                           | -,134  | ,017  | -,095 | ,804  | ,091  |
| [ Ich kann mir zu der Rohfassung meines Textes kritisches Feedback einholen. ] Um Ihnen die Beantwortung zu erleichtern, können Sie die Antwort in Prozent geben                         | -,120  | -,007 | -,052 | ,805  | -,022 |
| [ Ich kann das Feedback Anderer zu meinen Texten umsetzen. ] Um Ihnen die Beantwortung zu erleichtern, können Sie die Antwort in Prozent geben                                           | -,022  | -,060 | ,062  | ,705  | ,045  |
| [ Ich kann mich daran orientieren, welche Strategien KommilitonInnen beim Schreiben einsetzen.] Um Ihnen die Beantwortung zu erleichtern, können Sie die Antwort in Prozent geben        | -,249  | -,033 | -,074 | ,238  | ,540  |
| [ Ich kann mich beim Schreiben selbst beobachten. ] Um Ihnen die Beantwortung zu erleichtern, können Sie die Antwort in Prozent geben                                                    | -,002  | ,090  | -,076 | ,075  | ,365  |

Mustermatrix<sup>a</sup>

|                                                                                                                                                                                               | Faktor |       |       |      |       |
|-----------------------------------------------------------------------------------------------------------------------------------------------------------------------------------------------|--------|-------|-------|------|-------|
|                                                                                                                                                                                               | 1      | 2     | 3     | 4    | 5     |
| [ Ich kann mein Vorgehen beim Schreiben ändern, wenn ich merke, dass es nicht erfolgreich ist. ] Um Ihnen die Beantwortung zu erleichtern, können Sie die Antwort in Prozent geben            | ,538   | ,105  | -,015 | ,198 | ,109  |
| [ Ich kann meinen Zeitplan für das Schreiben anpassen, wenn ich merke, dass ich ihn nicht einhalten kann. ] Um Ihnen die Beantwortung zu erleichtern, können Sie die Antwort in Prozent geben | ,205   | -,071 | ,009  | ,340 | ,102  |
| [ Ich kann mein Vorankommen beim Schreiben nachvollziehen. ] Um Ihnen die Beantwortung zu erleichtern, können Sie die Antwort in Prozent geben                                                | ,498   | ,114  | ,012  | ,267 | ,040  |
| [ Ich kann mein Vorankommen beim Schreiben durch die Anzahl der geschriebenen Stunden nachvollziehen. ] Um Ihnen die Beantwortung zu erleichtern, können Sie die Antwort in Prozent geben     | -,064  | ,129  | -,153 | ,018 | ,660  |
| [ Ich kann mein Vorankommen beim Schreiben durch die Anzahl der geschriebenen Seiten nachvollziehen. ] Um Ihnen die Beantwortung zu erleichtern, können Sie die Antwort in Prozent geben      | ,066   | ,216  | ,052  | ,212 | ,199  |
| [ Ich kann ausdauernd an meinem Text arbeiten. ] Um Ihnen die Beantwortung zu erleichtern, können Sie die Antwort in Prozent geben                                                            | ,160   | ,562  | ,093  | ,043 | ,044  |
| [ Ich kann mehrere Ideen in einem Text zusammen führen. ] Um Ihnen die Beantwortung zu erleichtern, können Sie die Antwort in Prozent geben                                                   | ,775   | ,122  | -,143 | ,108 | -,173 |

Mustermatrix<sup>a</sup>

|                                                                                                                                                                                   | Faktor |       |       |       |       |
|-----------------------------------------------------------------------------------------------------------------------------------------------------------------------------------|--------|-------|-------|-------|-------|
|                                                                                                                                                                                   | 1      | 2     | 3     | 4     | 5     |
| [ Ich kann eine Schreiblockade lösen und danach weiterschreiben. ]<br>Um Ihnen die Beantwortung zu erleichtern, können Sie die Antwort in Prozent geben                           | ,242   | ,255  | ,154  | ,164  | -,035 |
| [ Ich kann mich lange Zeit auf das Schreiben konzentrieren, wenn es nötig ist. ]<br>Um Ihnen die Beantwortung zu erleichtern, können Sie die Antwort in Prozent geben             | ,220   | ,473  | ,160  | -,010 | -,024 |
| [ Ich kann die Qualität meines Textes realistisch einschätzen. ]<br>Um Ihnen die Beantwortung zu erleichtern, können Sie die Antwort in Prozent geben                             | ,867   | -,068 | -,147 | ,010  | -,049 |
| [ Ich kann die Anforderungen, die an meinen Text gestellt werden, erfüllen. ]<br>Um Ihnen die Beantwortung zu erleichtern, können Sie die Antwort in Prozent geben                | ,848   | ,137  | -,157 | ,029  | -,233 |
| [ Ich kann die von mir selbst gesetzten Kriterien für die Qualität meiner Texte erreichen. ]<br>Um Ihnen die Beantwortung zu erleichtern, können Sie die Antwort in Prozent geben | ,578   | ,298  | ,056  | ,068  | -,132 |
| [ Ich kann die von mir selbst gesetzten Teilziele beim Schreiben erreichen. ]<br>Um Ihnen die Beantwortung zu erleichtern, können Sie die Antwort in Prozent geben                | ,299   | ,133  | ,335  | ,152  | ,033  |
| [ Ich kann von mir selbst zu hoch gesetzte Ansprüche heruntersetzen. ]<br>Um Ihnen die Beantwortung zu erleichtern, können Sie die Antwort in Prozent geben                       | ,109   | -,056 | -,002 | ,336  | ,034  |

Mustermatrix<sup>a</sup>

|                                                                                                                                                                      | Faktor |       |       |       |       |
|----------------------------------------------------------------------------------------------------------------------------------------------------------------------|--------|-------|-------|-------|-------|
|                                                                                                                                                                      | 1      | 2     | 3     | 4     | 5     |
| [ Ich kann meine Texte durch Überarbeitung besser machen. ]<br>Um Ihnen die Beantwortung zu erleichtern, können Sie die Antwort in Prozent geben                     | ,579   | ,063  | -,257 | ,285  | ,055  |
| [ Ich kann meine Texte durch Überarbeitung verständlicher machen. ] Um Ihnen die Beantwortung zu erleichtern, können Sie die Antwort in Prozent geben                | ,666   | -,147 | -,192 | ,322  | ,050  |
| [ Ich kann mit der Qualität meiner Texte zufrieden sein. ] Um Ihnen die Beantwortung zu erleichtern, können Sie die Antwort in Prozent geben                         | ,826   | ,135  | -,169 | ,060  | -,125 |
| [ Ich kann ein gutes Gefühl für das Vorankommen beim Schreiben entwickeln. ] Um Ihnen die Beantwortung zu erleichtern, können Sie die Antwort in Prozent geben       | ,363   | ,146  | ,216  | ,133  | ,155  |
| [ Ich kann die Zeit, die mir zum Schreiben zur Verfügung steht, gut einschätzen. ] Um Ihnen die Beantwortung zu erleichtern, können Sie die Antwort in Prozent geben | ,181   | ,101  | ,358  | ,269  | ,045  |
| [ Ich kann vermeiden, dass ich einen Fehler beim nächsten Mal wieder mache. ] Um Ihnen die Beantwortung zu erleichtern, können Sie die Antwort in Prozent geben      | ,559   | ,224  | -,099 | -,013 | ,145  |
| [ Ich kann aus misslungenen Schreiberfahrungen lernen. ] Um Ihnen die Beantwortung zu erleichtern, können Sie die Antwort in Prozent geben                           | ,228   | ,042  | ,011  | ,217  | ,356  |
| [ Ich kann mein Vorgehen bei Schreibprojekten durch Erfahrung verbessern. ] Um Ihnen die Beantwortung zu erleichtern, können Sie die Antwort in Prozent geben        | ,430   | ,114  | ,086  | ,108  | ,098  |
| [ Ich kann einschätzen, was ich beim nächsten Mal anders machen muss. ] Um Ihnen die Beantwortung zu erleichtern, können Sie die Antwort in Prozent geben            | ,402   | ,206  | -,218 | ,207  | ,240  |

Extraktionsmethode: Hauptachsenfaktorenanalyse.  
 Rotationsmethode: Promax mit Kaiser-Normalisierung.<sup>a</sup>  
 a. Die Rotation ist in 10 Iterationen konvergiert.

**Strukturmatrix**

|                                                                                                                                                                                                                 | Faktor |      |      |      |      |
|-----------------------------------------------------------------------------------------------------------------------------------------------------------------------------------------------------------------|--------|------|------|------|------|
|                                                                                                                                                                                                                 | 1      | 2    | 3    | 4    | 5    |
| [ Ich kann die Anforderungen unterschiedlicher Textsorten (wie z. B. Hausarbeit, Protokoll, Critical Paper, usw.) verstehen.] Um Ihnen die Beantwortung zu erleichtern, können Sie die Antwort in Prozent geben | ,466   | ,303 | ,108 | ,179 | ,200 |
| [ Ich kann mir konkrete Schreibziele setzen. ] Um Ihnen die Beantwortung zu erleichtern, können Sie die Antwort in Prozent geben                                                                                | ,569   | ,284 | ,688 | ,438 | ,498 |
| [ Ich kann mein Schreibprojekt in kleinere Schreibziele unterteilen. ] Um Ihnen die Beantwortung zu erleichtern, können Sie die Antwort in Prozent geben                                                        | ,604   | ,238 | ,636 | ,378 | ,405 |
| [ Ich kann meine Ideen für meinen Text vor dem Schreiben strukturieren. ] Um Ihnen die Beantwortung zu erleichtern, können Sie die Antwort in Prozent geben                                                     | ,644   | ,256 | ,500 | ,234 | ,216 |
| [ Ich kann mir das Schreiben in sinnvolle Arbeitsschritte unterteilen. ] Um Ihnen die Beantwortung zu erleichtern, können Sie die Antwort in Prozent geben                                                      | ,755   | ,309 | ,696 | ,464 | ,316 |
| [ Ich kann meine Ideen auch bei einem komplexen Thema gut organisieren. ] Um Ihnen die Beantwortung zu erleichtern, können Sie die Antwort in Prozent geben                                                     | ,704   | ,382 | ,477 | ,276 | ,226 |

Strukturmatrix

|                                                                                                                                                                                                     | Faktor |      |      |      |      |
|-----------------------------------------------------------------------------------------------------------------------------------------------------------------------------------------------------|--------|------|------|------|------|
|                                                                                                                                                                                                     | 1      | 2    | 3    | 4    | 5    |
| [ Ich kann mich dazu motivieren mit dem Schreiben anzufangen. ]<br>Um Ihnen die Beantwortung zu erleichtern, können Sie die Antwort in Prozent geben                                                | ,330   | ,529 | ,610 | ,257 | ,262 |
| [ Ich kann mich erst auf den letzten Drücker zum Schreiben motivieren. ] Um Ihnen die Beantwortung zu erleichtern, können Sie die Antwort in Prozent geben                                          | ,200   | ,287 | ,575 | ,136 | ,158 |
| [ Ich kann Probleme, die beim Schreiben auftauchen, überwinden. ]<br>Um Ihnen die Beantwortung zu erleichtern, können Sie die Antwort in Prozent geben                                              | ,680   | ,528 | ,389 | ,367 | ,238 |
| [ Ich kann mich durch das Vorstellen negativer Konsequenzen des Nichtschreibens zum Weiterschreiben motivieren. ] Um Ihnen die Beantwortung zu erleichtern, können Sie die Antwort in Prozent geben | ,124   | ,129 | ,218 | ,082 | ,360 |
| [ Ich kann mich durch das Vorstellen positiver Konsequenzen zum Weiterschreiben motivieren. ]<br>Um Ihnen die Beantwortung zu erleichtern, können Sie die Antwort in Prozent geben                  | ,445   | ,434 | ,518 | ,129 | ,671 |
| [ Ich kann Freude am Schreiben entwickeln. ] Um Ihnen die Beantwortung zu erleichtern, können Sie die Antwort in Prozent geben                                                                      | ,416   | ,570 | ,455 | ,152 | ,378 |
| [ Ich kann Interesse für das Schreiben entwickeln. ] Um Ihnen die Beantwortung zu erleichtern, können Sie die Antwort in Prozent geben                                                              | ,515   | ,592 | ,454 | ,201 | ,467 |

Strukturmatrix

|                                                                                                                                                                                            | Faktor |      |      |       |      |
|--------------------------------------------------------------------------------------------------------------------------------------------------------------------------------------------|--------|------|------|-------|------|
|                                                                                                                                                                                            | 1      | 2    | 3    | 4     | 5    |
| [ Ich kann leicht Wege finden mein Interesse am Schreiben zu steigern. ] Um Ihnen die Beantwortung zu erleichtern, können Sie die Antwort in Prozent geben                                 | ,523   | ,558 | ,619 | ,144  | ,512 |
| [ Ich kann mir beim Schreiben vornehmen, gute Noten durch meine schriftlichen Arbeiten zu erzielen. ] Um Ihnen die Beantwortung zu erleichtern, können Sie die Antwort in Prozent geben    | ,552   | ,418 | ,322 | -,036 | ,383 |
| [ Ich kann mir beim Schreiben vornehmen, durch meine schriftlichen Arbeiten zu zeigen, wie gut ich bin.] Um Ihnen die Beantwortung zu erleichtern, können Sie die Antwort in Prozent geben | ,678   | ,540 | ,365 | ,073  | ,498 |
| [ Ich kann mir vornehmen, durch das Schreiben mein Wissen zu erweitern. ] Um Ihnen die Beantwortung zu erleichtern, können Sie die Antwort in Prozent geben                                | ,486   | ,647 | ,398 | ,111  | ,620 |
| [ Ich kann mir vornehmen, durch das Schreiben zu neuen Erkenntnissen zu gelangen. ] Um Ihnen die Beantwortung zu erleichtern, können Sie die Antwort in Prozent geben                      | ,405   | ,598 | ,305 | ,086  | ,511 |
| [ Ich kann mein Vorgehen beim Schreiben überwachen. ] Um Ihnen die Beantwortung zu erleichtern, können Sie die Antwort in Prozent geben                                                    | ,667   | ,559 | ,377 | ,338  | ,511 |
| [ Ich kann mich beim Schreiben durch lautes Vorlesen von Textstellen unterstützen. ] Um Ihnen die Beantwortung zu erleichtern, können Sie die Antwort in Prozent geben                     | ,213   | ,292 | ,081 | ,022  | ,380 |

Strukturmatrix

|                                                                                                                                                                                                   | Faktor |      |      |      |      |
|---------------------------------------------------------------------------------------------------------------------------------------------------------------------------------------------------|--------|------|------|------|------|
|                                                                                                                                                                                                   | 1      | 2    | 3    | 4    | 5    |
| [ Ich kann mich beim Schreiben durch innerliches Vorlesen von bereits geschriebenen Textstellen unterstützen. ] Um Ihnen die Beantwortung zu erleichtern, können Sie die Antwort in Prozent geben | ,406   | ,501 | ,317 | ,314 | ,349 |
| [ Ich kann mir die Dinge, die ich in meinem Text beschreibe, bildlich vorstellen. ] Um Ihnen die Beantwortung zu erleichtern, können Sie die Antwort in Prozent geben                             | ,489   | ,390 | ,204 | ,130 | ,318 |
| [ Ich kann zunächst einen Entwurf meines Textes anfertigen. ] Um Ihnen die Beantwortung zu erleichtern, können Sie die Antwort in Prozent geben                                                   | ,497   | ,204 | ,320 | ,262 | ,370 |
| [ Ich kann mir eine Gliederung erstellen, die mich beim Schreiben unterstützt. ] Um Ihnen die Beantwortung zu erleichtern, können Sie die Antwort in Prozent geben                                | ,608   | ,277 | ,447 | ,265 | ,249 |
| [ Ich kann mich auf das Schreiben konzentrieren. ] Um Ihnen die Beantwortung zu erleichtern, können Sie die Antwort in Prozent geben                                                              | ,693   | ,818 | ,581 | ,400 | ,481 |
| [ Ich kann Ablenkungen beim Schreiben ausblenden. ] Um Ihnen die Beantwortung zu erleichtern, können Sie die Antwort in Prozent geben                                                             | ,379   | ,696 | ,255 | ,218 | ,262 |
| [ Ich kann mich auf das Schreiben konzentrieren, auch wenn um mich herum viel passiert. ] Um Ihnen die Beantwortung zu erleichtern, können Sie die Antwort in Prozent geben                       | ,299   | ,585 | ,042 | ,141 | ,257 |



Strukturmatrix

|                                                                                                                                                                                          | Faktor |      |      |      |      |
|------------------------------------------------------------------------------------------------------------------------------------------------------------------------------------------|--------|------|------|------|------|
|                                                                                                                                                                                          | 1      | 2    | 3    | 4    | 5    |
| [ Ich kann mich auch auf das Schreiben konzentrieren, wenn ich andere Dinge im Kopf habe. ] Um Ihnen die Beantwortung zu erleichtern, können Sie die Antwort in Prozent geben            | ,403   | ,689 | ,345 | ,236 | ,323 |
| [ Ich kann mich wieder auf das Schreiben konzentrieren, wenn ich kurz an etwas anderes gedacht habe. ] Um Ihnen die Beantwortung zu erleichtern, können Sie die Antwort in Prozent geben | ,515   | ,733 | ,519 | ,390 | ,378 |
| [ Ich kann mich wieder auf das Schreiben konzentrieren, wenn ich kurz ablenkt war. ] Um Ihnen die Beantwortung zu erleichtern, können Sie die Antwort in Prozent geben                   | ,479   | ,721 | ,498 | ,322 | ,318 |
| [ Ich kann mich an meine festen Schreibzeiten halten. ] Um Ihnen die Beantwortung zu erleichtern, können Sie die Antwort in Prozent geben                                                | ,443   | ,365 | ,559 | ,297 | ,607 |
| [ Ich kann mir feste Schreibzeiten einplanen. ] Um Ihnen die Beantwortung zu erleichtern, können Sie die Antwort in Prozent geben                                                        | ,371   | ,210 | ,547 | ,210 | ,707 |
| [ Ich kann meine Schreibzeit effektiv nutzen. ] Um Ihnen die Beantwortung zu erleichtern, können Sie die Antwort in Prozent geben                                                        | ,700   | ,549 | ,668 | ,532 | ,426 |
| [ Ich kann meine Texte bis zur Abgabefrist fertigstellen. ] Um Ihnen die Beantwortung zu erleichtern, können Sie die Antwort in Prozent geben                                            | ,389   | ,325 | ,341 | ,435 | ,159 |
| [ Ich kann mir meine Zeit so einteilen, dass ich konzentriert an meinem Text arbeite. ] Um Ihnen die Beantwortung zu erleichtern, können Sie die Antwort in Prozent geben                | ,694   | ,594 | ,719 | ,491 | ,499 |

Strukturmatrix

|                                                                                                                                                                                          | Faktor |      |      |      |      |
|------------------------------------------------------------------------------------------------------------------------------------------------------------------------------------------|--------|------|------|------|------|
|                                                                                                                                                                                          | 1      | 2    | 3    | 4    | 5    |
| [ Ich kann, auch wenn viel zu tun ist, Zeit finden, um konzentriert an meinem Text zu arbeiten. ] Um Ihnen die Beantwortung zu erleichtern, können Sie die Antwort in Prozent geben      | ,558   | ,490 | ,490 | ,385 | ,410 |
| [ Ich kann mir meinen Schreibplatz so gestalten, dass ich ungestört schreiben kann. ] Um Ihnen die Beantwortung zu erleichtern, können Sie die Antwort in Prozent geben                  | ,511   | ,587 | ,527 | ,375 | ,492 |
| [ Ich kann mir einen geeigneten Platz zum Schreiben auswählen. ] Um Ihnen die Beantwortung zu erleichtern, können Sie die Antwort in Prozent geben                                       | ,473   | ,434 | ,484 | ,543 | ,339 |
| [ Ich kann mich durch Belohnungen zum Weiterschreiben motivieren. ] Um Ihnen die Beantwortung zu erleichtern, können Sie die Antwort in Prozent geben                                    | ,375   | ,348 | ,673 | ,300 | ,520 |
| [ Ich kann mich beim Schreiben selbst belohnen, indem ich mein Vorankommen protokolliere. ] Um Ihnen die Beantwortung zu erleichtern, können Sie die Antwort in Prozent geben            | ,170   | ,210 | ,354 | ,195 | ,531 |
| [ Ich kann mich beim Schreiben belohnen, indem ich mir bei gutem Vorankommen einen freien Tag gönne. ] Um Ihnen die Beantwortung zu erleichtern, können Sie die Antwort in Prozent geben | ,292   | ,321 | ,445 | ,163 | ,350 |
| [ Ich kann mich beim Schreiben belohnen, indem ich mir schöne Dinge für gutes Vorankommen gönne. ] Um Ihnen die Beantwortung zu erleichtern, können Sie die Antwort in Prozent geben     | ,324   | ,266 | ,640 | ,233 | ,374 |

Strukturmatrix

|                                                                                                                                                                                               | Faktor |      |      |      |      |
|-----------------------------------------------------------------------------------------------------------------------------------------------------------------------------------------------|--------|------|------|------|------|
|                                                                                                                                                                                               | 1      | 2    | 3    | 4    | 5    |
| [ Ich kann mir gezieltes Feedback zu meinen Text einholen. ] Um Ihnen die Beantwortung zu erleichtern, können Sie die Antwort in Prozent geben                                                | ,279   | ,215 | ,223 | ,725 | ,200 |
| [ Ich kann mir zu der Rohfassung meines Textes kritisches Feedback einholen. ] Um Ihnen die Beantwortung zu erleichtern, können Sie die Antwort in Prozent geben                              | ,245   | ,163 | ,207 | ,713 | ,104 |
| [ Ich kann das Feedback Anderer zu meinen Texten umsetzen. ] Um Ihnen die Beantwortung zu erleichtern, können Sie die Antwort in Prozent geben                                                | ,361   | ,223 | ,346 | ,711 | ,226 |
| [ Ich kann mich daran orientieren, welche Strategien KommilitonInnen beim Schreiben einsetzen.] Um Ihnen die Beantwortung zu erleichtern, können Sie die Antwort in Prozent geben             | ,094   | ,131 | ,133 | ,215 | ,420 |
| [ Ich kann mich beim Schreiben selbst beobachten. ] Um Ihnen die Beantwortung zu erleichtern, können Sie die Antwort in Prozent geben                                                         | ,240   | ,264 | ,179 | ,172 | ,391 |
| [ Ich kann mein Vorgehen beim Schreiben ändern, wenn ich merke, dass es nicht erfolgreich ist. ] Um Ihnen die Beantwortung zu erleichtern, können Sie die Antwort in Prozent geben            | ,754   | ,563 | ,497 | ,533 | ,493 |
| [ Ich kann meinen Zeitplan für das Schreiben anpassen, wenn ich merke, dass ich ihn nicht einhalten kann. ] Um Ihnen die Beantwortung zu erleichtern, können Sie die Antwort in Prozent geben | ,393   | ,234 | ,297 | ,452 | ,272 |

Strukturmatrix

|                                                                                                                                                                                           | Faktor |      |      |      |      |
|-------------------------------------------------------------------------------------------------------------------------------------------------------------------------------------------|--------|------|------|------|------|
|                                                                                                                                                                                           | 1      | 2    | 3    | 4    | 5    |
| [ Ich kann mein Vorankommen beim Schreiben nachvollziehen. ]<br>Um Ihnen die Beantwortung zu erleichtern, können Sie die Antwort in Prozent geben                                         | ,736   | ,550 | ,501 | ,578 | ,441 |
| [ Ich kann mein Vorankommen beim Schreiben durch die Anzahl der geschriebenen Stunden nachvollziehen. ] Um Ihnen die Beantwortung zu erleichtern, können Sie die Antwort in Prozent geben | ,284   | ,357 | ,206 | ,145 | ,619 |
| [ Ich kann mein Vorankommen beim Schreiben durch die Anzahl der geschriebenen Seiten nachvollziehen. ] Um Ihnen die Beantwortung zu erleichtern, können Sie die Antwort in Prozent geben  | ,449   | ,457 | ,383 | ,398 | ,427 |
| [ Ich kann ausdauernd an meinem Text arbeiten. ] Um Ihnen die Beantwortung zu erleichtern, können Sie die Antwort in Prozent geben                                                        | ,618   | ,744 | ,489 | ,373 | ,471 |
| [ Ich kann mehrere Ideen in einem Text zusammen führen. ] Um Ihnen die Beantwortung zu erleichtern, können Sie die Antwort in Prozent geben                                               | ,730   | ,498 | ,341 | ,438 | ,257 |
| [ Ich kann eine Schreibblockade lösen und danach weiterschreiben. ] Um Ihnen die Beantwortung zu erleichtern, können Sie die Antwort in Prozent geben                                     | ,562   | ,519 | ,470 | ,434 | ,343 |
| [ Ich kann mich lange Zeit auf das Schreiben konzentrieren, wenn es nötig ist. ] Um Ihnen die Beantwortung zu erleichtern, können Sie die Antwort in Prozent geben                        | ,599   | ,671 | ,495 | ,330 | ,408 |

Strukturmatrix

|                                                                                                                                                                                | Faktor |      |      |      |      |
|--------------------------------------------------------------------------------------------------------------------------------------------------------------------------------|--------|------|------|------|------|
|                                                                                                                                                                                | 1      | 2    | 3    | 4    | 5    |
| [ Ich kann die Qualität meines Textes realistisch einschätzen. ]<br>Um Ihnen die Beantwortung zu erleichtern, können Sie die Antwort in Prozent geben                          | ,715   | ,394 | ,326 | ,354 | ,306 |
| [ Ich kann die Anforderungen, die an meinen Text gestellt werden, erfüllen. ] Um Ihnen die Beantwortung zu erleichtern, können Sie die Antwort in Prozent geben                | ,731   | ,495 | ,313 | ,379 | ,214 |
| [ Ich kann die von mir selbst gesetzten Kriterien für die Qualität meiner Texte erreichen. ] Um Ihnen die Beantwortung zu erleichtern, können Sie die Antwort in Prozent geben | ,767   | ,649 | ,506 | ,456 | ,372 |
| [ Ich kann die von mir selbst gesetzten Teilziele beim Schreiben erreichen. ] Um Ihnen die Beantwortung zu erleichtern, können Sie die Antwort in Prozent geben                | ,680   | ,546 | ,658 | ,504 | ,467 |
| [ Ich kann von mir selbst zu hoch gesetzte Ansprüche heruntersetzen.] Um Ihnen die Beantwortung zu erleichtern, können Sie die Antwort in Prozent geben                        | ,262   | ,147 | ,199 | ,380 | ,154 |
| [ Ich kann meine Texte durch Überarbeitung besser machen. ] Um Ihnen die Beantwortung zu erleichtern, können Sie die Antwort in Prozent geben                                  | ,639   | ,439 | ,271 | ,508 | ,343 |
| [ Ich kann meine Texte durch Überarbeitung verständlicher machen. ] Um Ihnen die Beantwortung zu erleichtern, können Sie die Antwort in Prozent geben                          | ,648   | ,325 | ,306 | ,543 | ,320 |
| [ Ich kann mit der Qualität meiner Texte zufrieden sein. ] Um Ihnen die Beantwortung zu erleichtern, können Sie die Antwort in Prozent geben                                   | ,774   | ,539 | ,355 | ,423 | ,312 |

**Strukturmatrix**

|                                                                                                                                                                      | Faktor |      |      |      |      |
|----------------------------------------------------------------------------------------------------------------------------------------------------------------------|--------|------|------|------|------|
|                                                                                                                                                                      | 1      | 2    | 3    | 4    | 5    |
| [ Ich kann ein gutes Gefühl für das Vorankommen beim Schreiben entwickeln. ] Um Ihnen die Beantwortung zu erleichtern, können Sie die Antwort in Prozent geben       | ,736   | ,601 | ,637 | ,505 | ,565 |
| [ Ich kann die Zeit, die mir zum Schreiben zur Verfügung steht, gut einschätzen. ] Um Ihnen die Beantwortung zu erleichtern, können Sie die Antwort in Prozent geben | ,623   | ,498 | ,652 | ,563 | ,444 |
| [ Ich kann vermeiden, dass ich einen Fehler beim nächsten Mal wieder mache. ] Um Ihnen die Beantwortung zu erleichtern, können Sie die Antwort in Prozent geben      | ,711   | ,601 | ,409 | ,348 | ,501 |
| [ Ich kann aus misslungenen Schreibertüchtungen lernen. ] Um Ihnen die Beantwortung zu erleichtern, können Sie die Antwort in Prozent geben                          | ,562   | ,448 | ,440 | ,450 | ,563 |
| [ Ich kann mein Vorgehen bei Schreibprojekten durch Erfahrung verbessern. ] Um Ihnen die Beantwortung zu erleichtern, können Sie die Antwort in Prozent geben        | ,662   | ,514 | ,494 | ,432 | ,456 |
| [ Ich kann einschätzen, was ich beim nächsten Mal anders machen muss. ] Um Ihnen die Beantwortung zu erleichtern, können Sie die Antwort in Prozent geben            | ,634   | ,554 | ,328 | ,456 | ,504 |

Extraktionsmethode: Hauptachsenfaktorenanalyse.

Rotationsmethode: Promax mit Kaiser-Normalisierung.

**Korrelationsmatrix für Faktor**

| Faktor | 1     | 2     | 3     | 4     | 5     |
|--------|-------|-------|-------|-------|-------|
| 1      | 1,000 | ,635  | ,604  | ,512  | ,530  |
| 2      | ,635  | 1,000 | ,461  | ,350  | ,505  |
| 3      | ,604  | ,461  | 1,000 | ,430  | ,500  |
| 4      | ,512  | ,350  | ,430  | 1,000 | ,272  |
| 5      | ,530  | ,505  | ,500  | ,272  | 1,000 |

Extraktionsmethode: Hauptachsenfaktorenanalyse.

Rotationsmethode: Promax mit Kaiser-Normalisierung.

```

FACTOR
/VARIABLES SWSRS_prä_aa_2 SWSRS_prä_aa_5
SWSRS_prä_aa_6 SWSRS_prä_sm_1 SWSRS_prä_sm_3 SWSRS_prä_sm_7 SWSRS_prä_sm_8
SWSRS_akt_sk_1 SWSRS_akt_sk_7 SWSRS_akt_sk_11
SWSRS_akt_sk_12 SWSRS_akt_sk_15 SWSRS_akt_sk_17
SWSRS_akt_sk_18 SWSRS_akt_sk_19
SWSRS_akt_sb_2 SWSRS_akt_sb_4 SWSRS_akt_sb_7
SWSRS_akt_sb_9 SWSRS_akt_sb_10 SWSRS_post_sb_1 SWSRS_post_sb_3
SWSRS_post_sb_4 SWSRS_post_sr_2
SWSRS_post_sr_3 SWSRS_post_sr_4 SWSRS_post_sr_5 SWSRS_post_sr_6 SWSRS_post_sr_7
/MISSING LISTWISE
/ANALYSIS SWSRS_prä_aa_2 SWSRS_prä_aa_5
SWSRS_prä_aa_6 SWSRS_prä_sm_1 SWSRS_prä_sm_3 SWSRS_prä_sm_7 SWSRS_prä_sm_8
SWSRS_akt_sk_1 SWSRS_akt_sk_7 SWSRS_akt_sk_11
SWSRS_akt_sk_12 SWSRS_akt_sk_15 SWSRS_akt_sk_17
SWSRS_akt_sk_18 SWSRS_akt_sk_19
SWSRS_akt_sb_2 SWSRS_akt_sb_4 SWSRS_akt_sb_7
SWSRS_akt_sb_9 SWSRS_akt_sb_10 SWSRS_post_sb_1 SWSRS_post_sb_3
SWSRS_post_sb_4 SWSRS_post_sr_2
SWSRS_post_sr_3 SWSRS_post_sr_4 SWSRS_post_sr_5 SWSRS_post_sr_6 SWSRS_post_sr_7
/PRINT UNIVARIATE INITIAL CORRELATION KMO REPR AIC EXTRACTION ROTATION
/PLOT EIGEN
/CRITERIA MINEIGEN(1) ITERATE(100)
/EXTRACTION PAF
/CRITERIA ITERATE(100)
/ROTATION PROMAX(4)
/METHOD=CORRELATION.

```

## Faktorenanalyse

Deskriptive Statistiken

|                                                                                                                                                                                    | Mittelwert | Standardabweichung | Analyse N |
|------------------------------------------------------------------------------------------------------------------------------------------------------------------------------------|------------|--------------------|-----------|
| <input type="checkbox"/> Ich kann mir konkrete Schreibziele setzen. ] Um Ihnen die Beantwortung zu erleichtern, können Sie die Antwort in Prozent geben                            | 7,05       | 2,866              | 121       |
| <input type="checkbox"/> Ich kann mir das Schreiben in sinnvolle Arbeitsschritte unterteilen. ] Um Ihnen die Beantwortung zu erleichtern, können Sie die Antwort in Prozent geben  | 7,36       | 2,559              | 121       |
| <input type="checkbox"/> Ich kann meine Ideen auch bei einem komplexen Thema gut organisieren. ] Um Ihnen die Beantwortung zu erleichtern, können Sie die Antwort in Prozent geben | 7,17       | 2,502              | 121       |
| <input type="checkbox"/> Ich kann mich dazu motivieren mit dem Schreiben anzufangen. ] Um Ihnen die Beantwortung zu erleichtern, können Sie die Antwort in Prozent geben           | 6,17       | 3,057              | 121       |
| <input type="checkbox"/> Ich kann Probleme, die beim Schreiben auftauchen, überwinden. ] Um Ihnen die Beantwortung zu erleichtern, können Sie die Antwort in Prozent geben         | 7,73       | 2,244              | 121       |
| <input type="checkbox"/> Ich kann Interesse für das Schreiben entwickeln. ] Um Ihnen die Beantwortung zu erleichtern, können Sie die Antwort in Prozent geben                      | 7,64       | 2,787              | 121       |
| <input type="checkbox"/> Ich kann leicht Wege finden mein Interesse am Schreiben zu steigern. ] Um Ihnen die Beantwortung zu erleichtern, können Sie die Antwort in Prozent geben  | 5,87       | 2,735              | 121       |
| <input type="checkbox"/> Ich kann mein Vorgehen beim Schreiben überwachen. ] Um Ihnen die Beantwortung zu erleichtern, können Sie die Antwort in Prozent geben                     | 6,28       | 2,829              | 121       |



Deskriptive Statistiken

|                                                                                                                                                                                                                 | Mittelwert | Standardabweichung | Analyse N |
|-----------------------------------------------------------------------------------------------------------------------------------------------------------------------------------------------------------------|------------|--------------------|-----------|
| <input type="checkbox"/> Ich kann mich auf das Schreiben konzentrieren. ] Um Ihnen die Beantwortung zu erleichtern, können Sie die Antwort in Prozent geben                                                     | 7,54       | 2,717              | 121       |
| <input type="checkbox"/> Ich kann mich wieder auf das Schreiben konzentrieren, wenn ich kurz an etwas anderes gedacht habe. ] Um Ihnen die Beantwortung zu erleichtern, können Sie die Antwort in Prozent geben | 7,28       | 2,662              | 121       |
| <input type="checkbox"/> Ich kann mich wieder auf das Schreiben konzentrieren, wenn ich kurz ablenkt war. ] Um Ihnen die Beantwortung zu erleichtern, können Sie die Antwort in Prozent geben                   | 7,25       | 2,534              | 121       |
| <input type="checkbox"/> Ich kann meine Schreibzeit effektiv nutzen. ] Um Ihnen die Beantwortung zu erleichtern, können Sie die Antwort in Prozent geben                                                        | 6,56       | 2,834              | 121       |
| <input type="checkbox"/> Ich kann mir meine Zeit so einteilen, dass ich konzentriert an meinem Text arbeite. ] Um Ihnen die Beantwortung zu erleichtern, können Sie die Antwort in Prozent geben                | 6,67       | 2,879              | 121       |
| <input type="checkbox"/> Ich kann, auch wenn viel zu tun ist, Zeit finden, um konzentriert an meinem Text zu arbeiten. ] Um Ihnen die Beantwortung zu erleichtern, können Sie die Antwort in Prozent geben      | 6,12       | 2,852              | 121       |
| <input type="checkbox"/> Ich kann mir meinen Schreibplatz so gestalten, dass ich ungestört schreiben kann. ] Um Ihnen die Beantwortung zu erleichtern, können Sie die Antwort in Prozent geben                  | 7,31       | 3,019              | 121       |
| <input type="checkbox"/> Ich kann mein Vorgehen beim Schreiben ändern, wenn ich merke, dass es nicht erfolgreich ist. ] Um Ihnen die Beantwortung zu erleichtern, können Sie die Antwort in Prozent geben       | 7,12       | 2,762              | 121       |

Deskriptive Statistiken

|                                                                                                                                                                                | Mittelwert | Standardabweichung | Analyse N |
|--------------------------------------------------------------------------------------------------------------------------------------------------------------------------------|------------|--------------------|-----------|
| [ Ich kann mein Vorankommen beim Schreiben nachvollziehen. ]<br>Um Ihnen die Beantwortung zu erleichtern, können Sie die Antwort in Prozent geben                              | 7,79       | 2,474              | 121       |
| [ Ich kann ausdauernd an meinem Text arbeiten. ] Um Ihnen die Beantwortung zu erleichtern, können Sie die Antwort in Prozent geben                                             | 7,32       | 2,905              | 121       |
| [ Ich kann eine Schreibblockade lösen und danach weiterschreiben. ] Um Ihnen die Beantwortung zu erleichtern, können Sie die Antwort in Prozent geben                          | 6,40       | 2,651              | 121       |
| [ Ich kann mich lange Zeit auf das Schreiben konzentrieren, wenn es nötig ist. ] Um Ihnen die Beantwortung zu erleichtern, können Sie die Antwort in Prozent geben             | 7,74       | 2,877              | 121       |
| [ Ich kann die Qualität meines Textes realistisch einschätzen. ] Um Ihnen die Beantwortung zu erleichtern, können Sie die Antwort in Prozent geben                             | 7,49       | 2,589              | 121       |
| [ Ich kann die von mir selbst gesetzten Kriterien für die Qualität meiner Texte erreichen. ] Um Ihnen die Beantwortung zu erleichtern, können Sie die Antwort in Prozent geben | 7,84       | 2,429              | 121       |
| [ Ich kann die von mir selbst gesetzten Teilziele beim Schreiben erreichen. ] Um Ihnen die Beantwortung zu erleichtern, können Sie die Antwort in Prozent geben                | 7,19       | 2,919              | 121       |
| [ Ich kann ein gutes Gefühl für das Vorankommen beim Schreiben entwickeln. ] Um Ihnen die Beantwortung zu erleichtern, können Sie die Antwort in Prozent geben                 | 7,20       | 2,747              | 121       |

Deskriptive Statistiken

|                                                                                                                                                                                                                    | Mittelwert | Standardabweichung | Analyse N |
|--------------------------------------------------------------------------------------------------------------------------------------------------------------------------------------------------------------------|------------|--------------------|-----------|
| <input type="checkbox"/> Ich kann die Zeit, die mir zum Schreiben zur Verfügung steht, gut einschätzen. <input type="checkbox"/> Um Ihnen die Beantwortung zu erleichtern, können Sie die Antwort in Prozent geben | 7,00       | 2,864              | 121       |
| <input type="checkbox"/> Ich kann vermeiden, dass ich einen Fehler beim nächsten Mal wieder mache. <input type="checkbox"/> Um Ihnen die Beantwortung zu erleichtern, können Sie die Antwort in Prozent geben      | 7,60       | 2,594              | 121       |
| <input type="checkbox"/> Ich kann aus misslungenen Schreibertahrungen lernen. <input type="checkbox"/> Um Ihnen die Beantwortung zu erleichtern, können Sie die Antwort in Prozent geben                           | 7,43       | 2,819              | 121       |
| <input type="checkbox"/> Ich kann mein Vorgehen bei Schreibprojekten durch Erfahrung verbessern. <input type="checkbox"/> Um Ihnen die Beantwortung zu erleichtern, können Sie die Antwort in Prozent geben        | 7,97       | 2,674              | 121       |
| <input type="checkbox"/> Ich kann einschätzen, was ich beim nächsten Mal anders machen muss. <input type="checkbox"/> Um Ihnen die Beantwortung zu erleichtern, können Sie die Antwort in Prozent geben            | 7,46       | 2,513              | 121       |















**Kommunalitäten**

|                                                                                                                                                                                             | Anfänglich | Extraktion |
|---------------------------------------------------------------------------------------------------------------------------------------------------------------------------------------------|------------|------------|
| [ Ich kann Probleme, die beim Schreiben auftauchen, überwinden. ]<br>Um Ihnen die Beantwortung zu erleichtern, können Sie die Antwort in Prozent geben                                      | ,662       | ,559       |
| [ Ich kann Interesse für das Schreiben entwickeln. ]<br>Um Ihnen die Beantwortung zu erleichtern, können Sie die Antwort in Prozent geben                                                   | ,588       | ,523       |
| [ Ich kann leicht Wege finden mein Interesse am Schreiben zu steigern. ]<br>Um Ihnen die Beantwortung zu erleichtern, können Sie die Antwort in Prozent geben                               | ,585       | ,459       |
| [ Ich kann mein Vorgehen beim Schreiben überwachen. ]<br>Um Ihnen die Beantwortung zu erleichtern, können Sie die Antwort in Prozent geben                                                  | ,551       | ,453       |
| [ Ich kann mich auf das Schreiben konzentrieren. ]<br>Um Ihnen die Beantwortung zu erleichtern, können Sie die Antwort in Prozent geben                                                     | ,748       | ,729       |
| [ Ich kann mich wieder auf das Schreiben konzentrieren, wenn ich kurz an etwas anderes gedacht habe. ]<br>Um Ihnen die Beantwortung zu erleichtern, können Sie die Antwort in Prozent geben | ,748       | ,676       |
| [ Ich kann mich wieder auf das Schreiben konzentrieren, wenn ich kurz ablenkt war. ]<br>Um Ihnen die Beantwortung zu erleichtern, können Sie die Antwort in Prozent geben                   | ,707       | ,656       |
| [ Ich kann meine Schreibzeit effektiv nutzen. ]<br>Um Ihnen die Beantwortung zu erleichtern, können Sie die Antwort in Prozent geben                                                        | ,702       | ,687       |

**Kommunalitäten**

|                                                                                                                                                                                                            | Anfänglich | Extraktion |
|------------------------------------------------------------------------------------------------------------------------------------------------------------------------------------------------------------|------------|------------|
| <input type="checkbox"/> Ich kann mir meine Zeit so einteilen, dass ich konzentriert an meinem Text arbeite. ] Um Ihnen die Beantwortung zu erleichtern, können Sie die Antwort in Prozent geben           | ,787       | ,756       |
| <input type="checkbox"/> Ich kann, auch wenn viel zu tun ist, Zeit finden, um konzentriert an meinem Text zu arbeiten. ] Um Ihnen die Beantwortung zu erleichtern, können Sie die Antwort in Prozent geben | ,572       | ,453       |
| <input type="checkbox"/> Ich kann mir meinen Schreibplatz so gestalten, dass ich ungestört schreiben kann. ] Um Ihnen die Beantwortung zu erleichtern, können Sie die Antwort in Prozent geben             | ,563       | ,445       |
| <input type="checkbox"/> Ich kann mein Vorgehen beim Schreiben ändern, wenn ich merke, dass es nicht erfolgreich ist. ] Um Ihnen die Beantwortung zu erleichtern, können Sie die Antwort in Prozent geben  | ,690       | ,643       |
| <input type="checkbox"/> Ich kann mein Vorankommen beim Schreiben nachvollziehen. ] Um Ihnen die Beantwortung zu erleichtern, können Sie die Antwort in Prozent geben                                      | ,741       | ,633       |
| <input type="checkbox"/> Ich kann ausdauernd an meinem Text arbeiten. ] Um Ihnen die Beantwortung zu erleichtern, können Sie die Antwort in Prozent geben                                                  | ,728       | ,648       |
| <input type="checkbox"/> Ich kann eine Schreibblockade lösen und danach weiterschreiben. ] Um Ihnen die Beantwortung zu erleichtern, können Sie die Antwort in Prozent geben                               | ,568       | ,463       |
| <input type="checkbox"/> Ich kann mich lange Zeit auf das Schreiben konzentrieren, wenn es nötig ist. ] Um Ihnen die Beantwortung zu erleichtern, können Sie die Antwort in Prozent geben                  | ,731       | ,754       |

**Kommunalitäten**

|                                                                                                                                                                                                       | Anfänglich | Extraktion |
|-------------------------------------------------------------------------------------------------------------------------------------------------------------------------------------------------------|------------|------------|
| <input type="checkbox"/> Ich kann die Qualität meines Textes realistisch einschätzen. ] Um Ihnen die Beantwortung zu erleichtern, können Sie die Antwort in Prozent geben                             | ,635       | ,647       |
| <input type="checkbox"/> Ich kann die von mir selbst gesetzten Kriterien für die Qualität meiner Texte erreichen. ] Um Ihnen die Beantwortung zu erleichtern, können Sie die Antwort in Prozent geben | ,716       | ,699       |
| <input type="checkbox"/> Ich kann die von mir selbst gesetzten Teilziele beim Schreiben erreichen. ] Um Ihnen die Beantwortung zu erleichtern, können Sie die Antwort in Prozent geben                | ,666       | ,614       |
| <input type="checkbox"/> Ich kann ein gutes Gefühl für das Vorankommen beim Schreiben entwickeln. ] Um Ihnen die Beantwortung zu erleichtern, können Sie die Antwort in Prozent geben                 | ,778       | ,701       |
| <input type="checkbox"/> Ich kann die Zeit, die mir zum Schreiben zur Verfügung steht, gut einschätzen. ] Um Ihnen die Beantwortung zu erleichtern, können Sie die Antwort in Prozent geben           | ,704       | ,604       |
| <input type="checkbox"/> Ich kann vermeiden, dass ich einen Fehler beim nächsten Mal wieder mache. ] Um Ihnen die Beantwortung zu erleichtern, können Sie die Antwort in Prozent geben                | ,693       | ,642       |
| <input type="checkbox"/> Ich kann aus misslungenen Schreibertahrungen lernen. ] Um Ihnen die Beantwortung zu erleichtern, können Sie die Antwort in Prozent geben                                     | ,587       | ,571       |
| <input type="checkbox"/> Ich kann mein Vorgehen bei Schreibprojekten durch Erfahrung verbessern. ] Um Ihnen die Beantwortung zu erleichtern, können Sie die Antwort in Prozent geben                  | ,604       | ,566       |
| <input type="checkbox"/> Ich kann einschätzen, was ich beim nächsten Mal anders machen muss. ] Um Ihnen die Beantwortung zu erleichtern, können Sie die Antwort in Prozent geben                      | ,631       | ,600       |

Extraktionsmethode: Hauptachsen-Faktorenanalyse.

**Erklärte Gesamtvarianz**

| Faktor | Anfängliche Eigenwerte |               | Summen von quadrierten Faktorladungen für Extraktion |               | Kumulierte % | Rotierte Summe der quadrierten Ladungen <sup>a</sup> |
|--------|------------------------|---------------|------------------------------------------------------|---------------|--------------|------------------------------------------------------|
|        | Gesamt                 | % der Varianz | Gesamt                                               | % der Varianz |              |                                                      |
| 1      | 14,142                 | 48,765        | 13,760                                               | 47,449        | 47,449       | 9,819                                                |
| 2      | 1,672                  | 5,766         | 1,299                                                | 4,481         | 51,930       | 10,804                                               |
| 3      | 1,346                  | 4,640         | ,948                                                 | 3,269         | 55,199       | 9,598                                                |
| 4      | 1,223                  | 4,216         | ,815                                                 | 2,811         | 58,011       | 9,232                                                |
| 5      | 1,096                  | 3,780         | ,705                                                 | 2,431         | 60,442       | 8,545                                                |
| 6      | ,886                   | 3,055         |                                                      |               |              |                                                      |
| 7      | ,792                   | 2,731         |                                                      |               |              |                                                      |
| 8      | ,741                   | 2,554         |                                                      |               |              |                                                      |
| 9      | ,714                   | 2,462         |                                                      |               |              |                                                      |
| 10     | ,646                   | 2,227         |                                                      |               |              |                                                      |
| 11     | ,608                   | 2,096         |                                                      |               |              |                                                      |
| 12     | ,537                   | 1,853         |                                                      |               |              |                                                      |
| 13     | ,503                   | 1,735         |                                                      |               |              |                                                      |
| 14     | ,425                   | 1,465         |                                                      |               |              |                                                      |
| 15     | ,413                   | 1,425         |                                                      |               |              |                                                      |
| 16     | ,368                   | 1,270         |                                                      |               |              |                                                      |
| 17     | ,348                   | 1,199         |                                                      |               |              |                                                      |
| 18     | ,324                   | 1,119         |                                                      |               |              |                                                      |
| 19     | ,309                   | 1,067         |                                                      |               |              |                                                      |
| 20     | ,282                   | ,972          |                                                      |               |              |                                                      |
| 21     | ,258                   | ,890          |                                                      |               |              |                                                      |
| 22     | ,235                   | ,810          |                                                      |               |              |                                                      |
| 23     | ,232                   | ,800          |                                                      |               |              |                                                      |
| 24     | ,197                   | ,678          |                                                      |               |              |                                                      |
| 25     | ,171                   | ,589          |                                                      |               |              |                                                      |
| 26     | ,158                   | ,543          |                                                      |               |              |                                                      |
| 27     | ,145                   | ,500          |                                                      |               |              |                                                      |
| 28     | ,120                   | ,415          |                                                      |               |              |                                                      |
| 29     | ,109                   | ,377          |                                                      |               | 100,000      |                                                      |

Extraktionsmethode: Hauptachsen-Faktorenanalyse.

a. Wenn Faktoren korreliert sind, können die Summen der quadrierten Ladungen nicht addiert werden, um eine Gesamtvarianz zu erhalten.

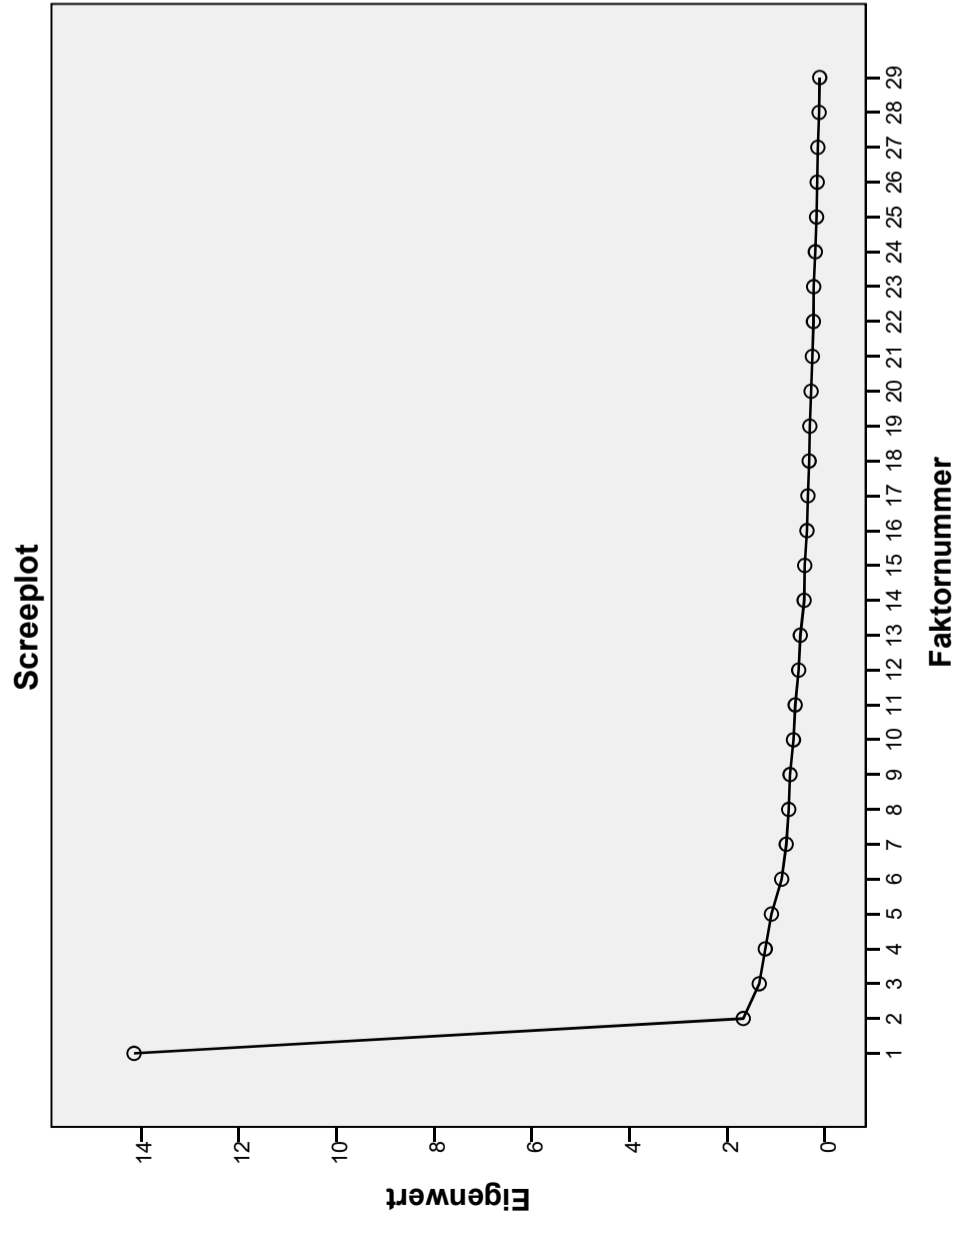

Faktorenmatrix<sup>a</sup>

|                                                                                                                                                             | Faktor |       |       |       |       |
|-------------------------------------------------------------------------------------------------------------------------------------------------------------|--------|-------|-------|-------|-------|
|                                                                                                                                                             | 1      | 2     | 3     | 4     | 5     |
| [ Ich kann mir konkrete Schreibziele setzen. ] Um Ihnen die Beantwortung zu erleichtern, können Sie die Antwort in Prozent geben                            | ,594   | -,120 | -,176 | ,353  | ,053  |
| [ Ich kann mir das Schreiben in sinnvolle Arbeitsschritte unterteilen. ] Um Ihnen die Beantwortung zu erleichtern, können Sie die Antwort in Prozent geben  | ,691   | -,307 | -,027 | ,325  | -,151 |
| [ Ich kann meine Ideen auch bei einem komplexen Thema gut organisieren. ] Um Ihnen die Beantwortung zu erleichtern, können Sie die Antwort in Prozent geben | ,615   | -,314 | ,225  | ,148  | -,238 |
| [ Ich kann mich dazu motivieren mit dem Schreiben anzufangen. ] Um Ihnen die Beantwortung zu erleichtern, können Sie die Antwort in Prozent geben           | ,511   | ,316  | -,054 | ,330  | ,204  |
| [ Ich kann Probleme, die beim Schreiben auftauchen, überwinden. ] Um Ihnen die Beantwortung zu erleichtern, können Sie die Antwort in Prozent geben         | ,645   | -,266 | ,193  | ,031  | ,183  |
| [ Ich kann Interesse für das Schreiben entwickeln. ] Um Ihnen die Beantwortung zu erleichtern, können Sie die Antwort in Prozent geben                      | ,605   | ,037  | ,270  | -,086 | ,276  |
| [ Ich kann leicht Wege finden mein Interesse am Schreiben zu steigern. ] Um Ihnen die Beantwortung zu erleichtern, können Sie die Antwort in Prozent geben  | ,619   | ,160  | ,105  | ,129  | ,150  |
| [ Ich kann mein Vorgehen beim Schreiben überwachen. ] Um Ihnen die Beantwortung zu erleichtern, können Sie die Antwort in Prozent geben                     | ,644   | -,100 | ,027  | ,002  | ,164  |

Faktorenmatrix<sup>a</sup>

|                                                                                                                                                                                          | Faktor |       |       |       |       |
|------------------------------------------------------------------------------------------------------------------------------------------------------------------------------------------|--------|-------|-------|-------|-------|
|                                                                                                                                                                                          | 1      | 2     | 3     | 4     | 5     |
| [ Ich kann mich auf das Schreiben konzentrieren. ] Um Ihnen die Beantwortung zu erleichtern, können Sie die Antwort in Prozent geben                                                     | ,808   | ,245  | ,121  | -,024 | ,013  |
| [ Ich kann mich wieder auf das Schreiben konzentrieren, wenn ich kurz an etwas anderes gedacht habe. ] Um Ihnen die Beantwortung zu erleichtern, können Sie die Antwort in Prozent geben | ,682   | ,445  | -,022 | -,006 | -,114 |
| [ Ich kann mich wieder auf das Schreiben konzentrieren, wenn ich kurz ablenkt war. ] Um Ihnen die Beantwortung zu erleichtern, können Sie die Antwort in Prozent geben                   | ,645   | ,466  | ,101  | ,034  | -,110 |
| [ Ich kann meine Schreibzeit effektiv nutzen. ] Um Ihnen die Beantwortung zu erleichtern, können Sie die Antwort in Prozent geben                                                        | ,785   | -,029 | -,172 | ,099  | -,176 |
| [ Ich kann mir meine Zeit so einteilen, dass ich konzentriert an meinem Text arbeite. ] Um Ihnen die Beantwortung zu erleichtern, können Sie die Antwort in Prozent geben                | ,808   | ,105  | -,134 | ,113  | -,248 |
| [ Ich kann, auch wenn viel zu tun ist, Zeit finden, um konzentriert an meinem Text zu arbeiten. ] Um Ihnen die Beantwortung zu erleichtern, können Sie die Antwort in Prozent geben      | ,617   | ,099  | -,182 | ,039  | -,167 |
| [ Ich kann mir meinen Schreibplatz so gestalten, dass ich ungestört schreiben kann. ] Um Ihnen die Beantwortung zu erleichtern, können Sie die Antwort in Prozent geben                  | ,636   | ,161  | ,009  | -,108 | -,057 |



Faktorenmatrix<sup>a</sup>

|                                                                                                                                                                                    | Faktor |       |       |       |       |
|------------------------------------------------------------------------------------------------------------------------------------------------------------------------------------|--------|-------|-------|-------|-------|
|                                                                                                                                                                                    | 1      | 2     | 3     | 4     | 5     |
| [ Ich kann mein Vorgehen beim Schreiben ändern, wenn ich merke, dass es nicht erfolgreich ist. ] Um Ihnen die Beantwortung zu erleichtern, können Sie die Antwort in Prozent geben | ,762   | -,208 | -,032 | -,127 | ,034  |
| [ Ich kann mein Vorankommen beim Schreiben nachvollziehen. ] Um Ihnen die Beantwortung zu erleichtern, können Sie die Antwort in Prozent geben                                     | ,750   | -,224 | ,033  | -,098 | ,098  |
| [ Ich kann ausdauernd an meinem Text arbeiten. ] Um Ihnen die Beantwortung zu erleichtern, können Sie die Antwort in Prozent geben                                                 | ,750   | ,129  | ,247  | -,076 | ,041  |
| [ Ich kann eine Schreibblockade lösen und danach weiterschreiben. ] Um Ihnen die Beantwortung zu erleichtern, können Sie die Antwort in Prozent geben                              | ,621   | -,128 | ,201  | ,070  | ,129  |
| [ Ich kann mich lange Zeit auf das Schreiben konzentrieren, wenn es nötig ist. ] Um Ihnen die Beantwortung zu erleichtern, können Sie die Antwort in Prozent geben                 | ,708   | ,229  | ,337  | -,166 | -,244 |
| [ Ich kann die Qualität meines Textes realistisch einschätzen. ] Um Ihnen die Beantwortung zu erleichtern, können Sie die Antwort in Prozent geben                                 | ,621   | -,370 | ,013  | -,208 | -,285 |
| [ Ich kann die von mir selbst gesetzten Kriterien für die Qualität meiner Texte erreichen. ] Um Ihnen die Beantwortung zu erleichtern, können Sie die Antwort in Prozent geben     | ,772   | -,116 | ,298  | -,025 | -,008 |
| [ Ich kann die von mir selbst gesetzten Teilziele beim Schreiben erreichen. ] Um Ihnen die Beantwortung zu erleichtern, können Sie die Antwort in Prozent geben                    | ,765   | -,006 | -,085 | ,136  | ,047  |

Faktorenmatrix<sup>a</sup>

|                                                                                                                                                                      | Faktor |       |       |       |       |
|----------------------------------------------------------------------------------------------------------------------------------------------------------------------|--------|-------|-------|-------|-------|
|                                                                                                                                                                      | 1      | 2     | 3     | 4     | 5     |
| [ Ich kann ein gutes Gefühl für das Vorankommen beim Schreiben entwickeln. ] Um Ihnen die Beantwortung zu erleichtern, können Sie die Antwort in Prozent geben       | ,794   | -,106 | -,088 | ,015  | ,228  |
| [ Ich kann die Zeit, die mir zum Schreiben zur Verfügung steht, gut einschätzen. ] Um Ihnen die Beantwortung zu erleichtern, können Sie die Antwort in Prozent geben | ,721   | -,025 | -,241 | ,153  | ,039  |
| [ Ich kann vermeiden, dass ich einen Fehler beim nächsten Mal wieder mache. ] Um Ihnen die Beantwortung zu erleichtern, können Sie die Antwort in Prozent geben      | ,726   | -,110 | -,103 | -,301 | ,044  |
| [ Ich kann aus misslungenen Schreibverfahren lernen. ] Um Ihnen die Beantwortung zu erleichtern, können Sie die Antwort in Prozent geben                             | ,622   | ,056  | -,306 | -,218 | ,200  |
| [ Ich kann mein Vorgehen bei Schreibprojekten durch Erfahrung verbessern. ] Um Ihnen die Beantwortung zu erleichtern, können Sie die Antwort in Prozent geben        | ,684   | -,035 | -,269 | -,147 | -,059 |
| [ Ich kann einschätzen, was ich beim nächsten Mal anders machen muss. ] Um Ihnen die Beantwortung zu erleichtern, können Sie die Antwort in Prozent geben            | ,657   | ,066  | -,281 | -,286 | ,047  |

Extraktionsmethode: Hauptachsenfaktorenanalyse.

a. 5 Faktoren extrahiert. Es werden 7 Iterationen benötigt.









Mustermatrix<sup>a</sup>

|                                                                                                                                                                                                                 | Faktor |       |       |       |       |
|-----------------------------------------------------------------------------------------------------------------------------------------------------------------------------------------------------------------|--------|-------|-------|-------|-------|
|                                                                                                                                                                                                                 | 1      | 2     | 3     | 4     | 5     |
| <input type="checkbox"/> Ich kann Interesse für das Schreiben entwickeln. ] Um Ihnen die Beantwortung zu erleichtern, können Sie die Antwort in Prozent geben                                                   | ,163   | ,059  | ,674  | -,137 | -,036 |
| <input type="checkbox"/> Ich kann leicht Wege finden mein Interesse am Schreiben zu steigern. ] Um Ihnen die Beantwortung zu erleichtern, können Sie die Antwort in Prozent geben                               | ,298   | -,043 | ,345  | -,107 | ,276  |
| <input type="checkbox"/> Ich kann mein Vorgehen beim Schreiben überwachen. ] Um Ihnen die Beantwortung zu erleichtern, können Sie die Antwort in Prozent geben                                                  | -,035  | ,211  | ,391  | ,052  | ,161  |
| <input type="checkbox"/> Ich kann mich auf das Schreiben konzentrieren. ] Um Ihnen die Beantwortung zu erleichtern, können Sie die Antwort in Prozent geben                                                     | ,552   | ,106  | ,256  | -,016 | ,079  |
| <input type="checkbox"/> Ich kann mich wieder auf das Schreiben konzentrieren, wenn ich kurz an etwas anderes gedacht habe. ] Um Ihnen die Beantwortung zu erleichtern, können Sie die Antwort in Prozent geben | ,762   | ,153  | -,098 | -,114 | ,114  |
| <input type="checkbox"/> Ich kann mich wieder auf das Schreiben konzentrieren, wenn ich kurz ablenkt war. ] Um Ihnen die Beantwortung zu erleichtern, können Sie die Antwort in Prozent geben                   | ,828   | -,037 | -,005 | -,099 | ,098  |
| <input type="checkbox"/> Ich kann meine Schreibzeit effektiv nutzen. ] Um Ihnen die Beantwortung zu erleichtern, können Sie die Antwort in Prozent geben                                                        | ,200   | ,237  | -,129 | ,351  | ,305  |
| <input type="checkbox"/> Ich kann mir meine Zeit so einteilen, dass ich konzentriert an meinem Text arbeite. ] Um Ihnen die Beantwortung zu erleichtern, können Sie die Antwort in Prozent geben                | ,423   | ,153  | -,206 | ,335  | ,289  |

Mustermatrix<sup>a</sup>

|                                                                                                                                                                                     | Faktor |       |       |      |       |
|-------------------------------------------------------------------------------------------------------------------------------------------------------------------------------------|--------|-------|-------|------|-------|
|                                                                                                                                                                                     | 1      | 2     | 3     | 4    | 5     |
| [ Ich kann, auch wenn viel zu tun ist, Zeit finden, um konzentriert an meinem Text zu arbeiten. ] Um Ihnen die Beantwortung zu erleichtern, können Sie die Antwort in Prozent geben | ,298   | ,264  | -,206 | ,181 | ,210  |
| [ Ich kann mir meinen Schreibplatz so gestalten, dass ich ungestört schreiben kann. ] Um Ihnen die Beantwortung zu erleichtern, können Sie die Antwort in Prozent geben             | ,406   | ,255  | ,075  | ,043 | -,025 |
| [ Ich kann mein Vorgehen beim Schreiben ändern, wenn ich merke, dass es nicht erfolgreich ist. ] Um Ihnen die Beantwortung zu erleichtern, können Sie die Antwort in Prozent geben  | -,064  | ,410  | ,282  | ,266 | ,014  |
| [ Ich kann mein Vorankommen beim Schreiben nachvollziehen. ] Um Ihnen die Beantwortung zu erleichtern, können Sie die Antwort in Prozent geben                                      | -,099  | ,327  | ,404  | ,233 | ,034  |
| [ Ich kann ausdauernd an meinem Text arbeiten. ] Um Ihnen die Beantwortung zu erleichtern, können Sie die Antwort in Prozent geben                                                  | ,446   | ,025  | ,422  | ,066 | -,053 |
| [ Ich kann eine Schreibblockade lösen und danach weiterschreiben. ] Um Ihnen die Beantwortung zu erleichtern, können Sie die Antwort in Prozent geben                               | ,023   | -,074 | ,505  | ,175 | ,143  |
| [ Ich kann mich lange Zeit auf das Schreiben konzentrieren, wenn es nötig ist. ] Um Ihnen die Beantwortung zu erleichtern, können Sie die Antwort in Prozent geben                  | ,776   | -,094 | ,174  | ,291 | -,297 |
| [ Ich kann die Qualität meines Textes realistisch einschätzen. ] Um Ihnen die Beantwortung zu erleichtern, können Sie die Antwort in Prozent geben                                  | -,067  | ,307  | ,016  | ,716 | -,235 |



Mustermatrix<sup>a</sup>

|                                                                                                                                                                                | Faktor |       |       |       |       |
|--------------------------------------------------------------------------------------------------------------------------------------------------------------------------------|--------|-------|-------|-------|-------|
|                                                                                                                                                                                | 1      | 2     | 3     | 4     | 5     |
| [ Ich kann die von mir selbst gesetzten Kriterien für die Qualität meiner Texte erreichen. ] Um Ihnen die Beantwortung zu erleichtern, können Sie die Antwort in Prozent geben | ,215   | -,085 | ,495  | ,356  | -,032 |
| [ Ich kann die von mir selbst gesetzten Teilziele beim Schreiben erreichen. ] Um Ihnen die Beantwortung zu erleichtern, können Sie die Antwort in Prozent geben                | ,120   | ,173  | ,161  | ,119  | ,370  |
| [ Ich kann ein gutes Gefühl für das Vorankommen beim Schreiben entwickeln. ] Um Ihnen die Beantwortung zu erleichtern, können Sie die Antwort in Prozent geben                 | -,094  | ,387  | ,395  | -,013 | ,281  |
| [ Ich kann die Zeit, die mir zum Schreiben zur Verfügung steht, gut einschätzen. ] Um Ihnen die Beantwortung zu erleichtern, können Sie die Antwort in Prozent geben           | ,018   | ,312  | ,008  | ,090  | ,457  |
| [ Ich kann vermeiden, dass ich einen Fehler beim nächsten Mal wieder mache. ] Um Ihnen die Beantwortung zu erleichtern, können Sie die Antwort in Prozent geben                | ,013   | ,668  | ,205  | ,109  | -,165 |
| [ Ich kann aus misslungenen Schreibverfahren lernen. ] Um Ihnen die Beantwortung zu erleichtern, können Sie die Antwort in Prozent geben                                       | -,018  | ,819  | ,100  | -,269 | ,066  |
| [ Ich kann mein Vorgehen bei Schreibprojekten durch Erfahrung verbessern. ] Um Ihnen die Beantwortung zu erleichtern, können Sie die Antwort in Prozent geben                  | ,067   | ,629  | -,094 | ,128  | ,067  |
| [ Ich kann einschätzen, was ich beim nächsten Mal anders machen muss. ] Um Ihnen die Beantwortung zu erleichtern, können Sie die Antwort in Prozent geben                      | ,115   | ,821  | -,023 | -,110 | -,068 |

Extraktionsmethode: Hauptachsenfaktorenanalyse.  
 Rotationsmethode: Promax mit Kaiser-Normalisierung.<sup>a</sup>

a. Die Rotation ist in 10 Iterationen konvergiert.

Strukturmatrix

|                                                                                                                                                             | Faktor |      |      |      |      |
|-------------------------------------------------------------------------------------------------------------------------------------------------------------|--------|------|------|------|------|
|                                                                                                                                                             | 1      | 2    | 3    | 4    | 5    |
| [ Ich kann mir konkrete Schreibziele setzen. ] Um Ihnen die Beantwortung zu erleichtern, können Sie die Antwort in Prozent geben                            | ,382   | ,489 | ,436 | ,498 | ,704 |
| [ Ich kann mir das Schreiben in sinnvolle Arbeitsschritte unterteilen. ] Um Ihnen die Beantwortung zu erleichtern, können Sie die Antwort in Prozent geben  | ,431   | ,526 | ,526 | ,750 | ,683 |
| [ Ich kann meine Ideen auch bei einem komplexen Thema gut organisieren. ] Um Ihnen die Beantwortung zu erleichtern, können Sie die Antwort in Prozent geben | ,426   | ,415 | ,543 | ,745 | ,440 |
| [ Ich kann mich dazu motivieren mit dem Schreiben anzufangen. ] Um Ihnen die Beantwortung zu erleichtern, können Sie die Antwort in Prozent geben           | ,524   | ,365 | ,409 | ,192 | ,631 |
| [ Ich kann Probleme, die beim Schreiben auftauchen, überwinden. ] Um Ihnen die Beantwortung zu erleichtern, können Sie die Antwort in Prozent geben         | ,395   | ,508 | ,714 | ,575 | ,467 |
| [ Ich kann Interesse für das Schreiben entwickeln. ] Um Ihnen die Beantwortung zu erleichtern, können Sie die Antwort in Prozent geben                      | ,511   | ,470 | ,708 | ,379 | ,376 |
| [ Ich kann leicht Wege finden mein Interesse am Schreiben zu steigern. ] Um Ihnen die Beantwortung zu erleichtern, können Sie die Antwort in Prozent geben  | ,576   | ,466 | ,576 | ,378 | ,543 |
| [ Ich kann mein Vorgehen beim Schreiben überwachen. ] Um Ihnen die Beantwortung zu erleichtern, können Sie die Antwort in Prozent geben                     | ,456   | ,568 | ,617 | ,496 | ,507 |

Strukturmatrix

|                                                                                                                                                                                                                 | Faktor |      |      |      |      |
|-----------------------------------------------------------------------------------------------------------------------------------------------------------------------------------------------------------------|--------|------|------|------|------|
|                                                                                                                                                                                                                 | 1      | 2    | 3    | 4    | 5    |
| <input type="checkbox"/> Ich kann mich auf das Schreiben konzentrieren. ] Um Ihnen die Beantwortung zu erleichtern, können Sie die Antwort in Prozent geben                                                     | ,810   | ,661 | ,683 | ,547 | ,587 |
| <input type="checkbox"/> Ich kann mich wieder auf das Schreiben konzentrieren, wenn ich kurz an etwas anderes gedacht habe. ] Um Ihnen die Beantwortung zu erleichtern, können Sie die Antwort in Prozent geben | ,807   | ,581 | ,445 | ,400 | ,536 |
| <input type="checkbox"/> Ich kann mich wieder auf das Schreiben konzentrieren, wenn ich kurz ablenkt war. ] Um Ihnen die Beantwortung zu erleichtern, können Sie die Antwort in Prozent geben                   | ,804   | ,491 | ,459 | ,370 | ,493 |
| <input type="checkbox"/> Ich kann meine Schreibzeit effektiv nutzen. ] Um Ihnen die Beantwortung zu erleichtern, können Sie die Antwort in Prozent geben                                                        | ,639   | ,715 | ,510 | ,701 | ,688 |
| <input type="checkbox"/> Ich kann mir meine Zeit so einteilen, dass ich konzentriert an meinem Text arbeite. ] Um Ihnen die Beantwortung zu erleichtern, können Sie die Antwort in Prozent geben                | ,745   | ,707 | ,496 | ,694 | ,698 |
| <input type="checkbox"/> Ich kann, auch wenn viel zu tun ist, Zeit finden, um konzentriert an meinem Text zu arbeiten. ] Um Ihnen die Beantwortung zu erleichtern, können Sie die Antwort in Prozent geben      | ,563   | ,583 | ,356 | ,505 | ,536 |
| <input type="checkbox"/> Ich kann mir meinen Schreibplatz so gestalten, dass ich ungestört schreiben kann. ] Um Ihnen die Beantwortung zu erleichtern, können Sie die Antwort in Prozent geben                  | ,624   | ,577 | ,488 | ,464 | ,430 |

Strukturmatrix

|                                                                                                                                                                                    | Faktor |      |      |      |      |
|------------------------------------------------------------------------------------------------------------------------------------------------------------------------------------|--------|------|------|------|------|
|                                                                                                                                                                                    | 1      | 2    | 3    | 4    | 5    |
| [ Ich kann mein Vorgehen beim Schreiben ändern, wenn ich merke, dass es nicht erfolgreich ist. ] Um Ihnen die Beantwortung zu erleichtern, können Sie die Antwort in Prozent geben | ,520   | ,731 | ,666 | ,684 | ,525 |
| [ Ich kann mein Vorankommen beim Schreiben nachvollziehen. ] Um Ihnen die Beantwortung zu erleichtern, können Sie die Antwort in Prozent geben                                     | ,499   | ,691 | ,706 | ,661 | ,519 |
| [ Ich kann ausdauernd an meinem Text arbeiten. ] Um Ihnen die Beantwortung zu erleichtern, können Sie die Antwort in Prozent geben                                                 | ,719   | ,586 | ,716 | ,549 | ,474 |
| [ Ich kann eine Schreibblockade lösen und danach weiterschreiben. ] Um Ihnen die Beantwortung zu erleichtern, können Sie die Antwort in Prozent geben                              | ,453   | ,463 | ,653 | ,518 | ,467 |
| [ Ich kann mich lange Zeit auf das Schreiben konzentrieren, wenn es nötig ist. ] Um Ihnen die Beantwortung zu erleichtern, können Sie die Antwort in Prozent geben                 | ,805   | ,523 | ,600 | ,593 | ,333 |
| [ Ich kann die Qualität meines Textes realistisch einschätzen. ] Um Ihnen die Beantwortung zu erleichtern, können Sie die Antwort in Prozent geben                                 | ,392   | ,605 | ,476 | ,771 | ,309 |
| [ Ich kann die von mir selbst gesetzten Kriterien für die Qualität meiner Texte erreichen. ] Um Ihnen die Beantwortung zu erleichtern, können Sie die Antwort in Prozent geben     | ,630   | ,581 | ,769 | ,697 | ,486 |
| [ Ich kann die von mir selbst gesetzten Teilziele beim Schreiben erreichen. ] Um Ihnen die Beantwortung zu erleichtern, können Sie die Antwort in Prozent geben                    | ,604   | ,665 | ,606 | ,593 | ,696 |

**Strukturmatrix**

|                                                                                                                                                                      | Faktor |      |      |      |      |
|----------------------------------------------------------------------------------------------------------------------------------------------------------------------|--------|------|------|------|------|
|                                                                                                                                                                      | 1      | 2    | 3    | 4    | 5    |
| [ Ich kann ein gutes Gefühl für das Vorankommen beim Schreiben entwickeln. ] Um Ihnen die Beantwortung zu erleichtern, können Sie die Antwort in Prozent geben       | ,547   | ,741 | ,719 | ,584 | ,672 |
| [ Ich kann die Zeit, die mir zum Schreiben zur Verfügung steht, gut einschätzen. ] Um Ihnen die Beantwortung zu erleichtern, können Sie die Antwort in Prozent geben | ,535   | ,679 | ,507 | ,557 | ,717 |
| [ Ich kann vermeiden, dass ich einen Fehler beim nächsten Mal wieder mache. ] Um Ihnen die Beantwortung zu erleichtern, können Sie die Antwort in Prozent geben      | ,532   | ,773 | ,608 | ,601 | ,430 |
| [ Ich kann aus misslungenen Schreibertüchtungen lernen. ] Um Ihnen die Beantwortung zu erleichtern, können Sie die Antwort in Prozent geben                          | ,465   | ,731 | ,471 | ,367 | ,484 |
| [ Ich kann mein Vorgehen bei Schreibprojekten durch Erfahrung verbessern. ] Um Ihnen die Beantwortung zu erleichtern, können Sie die Antwort in Prozent geben        | ,524   | ,742 | ,449 | ,564 | ,521 |
| [ Ich kann einschätzen, was ich beim nächsten Mal anders machen muss. ] Um Ihnen die Beantwortung zu erleichtern, können Sie die Antwort in Prozent geben            | ,535   | ,765 | ,455 | ,454 | ,448 |

Extraktionsmethode: Hauptachsenfaktorenanalyse.

Rotationsmethode: Promax mit Kaiser-Normalisierung.

**Korrelationsmatrix für Faktor**

| Faktor | 1     | 2     | 3     | 4     | 5     |
|--------|-------|-------|-------|-------|-------|
| 1      | 1,000 | ,647  | ,598  | ,537  | ,573  |
| 2      | ,647  | 1,000 | ,622  | ,671  | ,633  |
| 3      | ,598  | ,622  | 1,000 | ,604  | ,524  |
| 4      | ,537  | ,671  | ,604  | 1,000 | ,530  |
| 5      | ,573  | ,633  | ,524  | ,530  | 1,000 |

Extraktionsmethode: Hauptachsenfaktorenanalyse.

Rotationsmethode: Promax mit Kaiser-Normalisierung.

\* Parallel Analysis program.

set mxloops=9000 printback=off width=80 seed = 1953125.

## Matrix

Run MATRIX procedure:

PARALLEL ANALYSIS:

Principal Axis / Common Factor Analysis

Specifications for this Run:

Ncases 121  
Nvars 29  
Ndatasets 100  
Percent 95

Random Data Eigenvalues

|     | Root      | Means    | Prcntyle |
|-----|-----------|----------|----------|
| 1.  | 1.000000  | 1.309378 | 1.470823 |
| 2.  | 2.000000  | 1.142654 | 1.243834 |
| 3.  | 3.000000  | 1.012253 | 1.121648 |
| 4.  | 4.000000  | .910254  | .991490  |
| 5.  | 5.000000  | .817145  | .921866  |
| 6.  | 6.000000  | .723780  | .822050  |
| 7.  | 7.000000  | .638703  | .707845  |
| 8.  | 8.000000  | .565742  | .648705  |
| 9.  | 9.000000  | .498267  | .562011  |
| 10. | 10.000000 | .427739  | .497022  |
| 11. | 11.000000 | .365468  | .420643  |
| 12. | 12.000000 | .305696  | .361633  |
| 13. | 13.000000 | .249750  | .311206  |
| 14. | 14.000000 | .199501  | .258193  |
| 15. | 15.000000 | .149959  | .199581  |
| 16. | 16.000000 | .097776  | .143519  |
| 17. | 17.000000 | .047339  | .095405  |
| 18. | 18.000000 | .003274  | .044250  |
| 19. | 19.000000 | -.044487 | -.012192 |
| 20. | 20.000000 | -.088694 | -.050993 |
| 21. | 21.000000 | -.128759 | -.093705 |
| 22. | 22.000000 | -.171200 | -.134269 |
| 23. | 23.000000 | -.213806 | -.184332 |
| 24. | 24.000000 | -.251850 | -.222196 |
| 25. | 25.000000 | -.286065 | -.260916 |

```
26.000000    -.323199    -.296683
27.000000    -.360360    -.335787
28.000000    -.397009    -.368596
29.000000    -.437582    -.408502
```

Compare the random data eigenvalues to the

real-data eigenvalues that are obtained from a

Common Factor Analysis in which the # of factors

extracted equals the # of variables/items, and the

number of iterations is fixed at zero;

To obtain these real-data values using SPSS, see the

sample commands at the end of the parallel.sps program,

or use the rawpar.sps program.

Warning: Parallel analyses of adjusted correlation matrices

eg, with SMCs on the diagonal, tend to indicate more factors

than warranted (Buja, A., & Eyuboglu, N., 1992, Remarks on parallel

analysis. Multivariate Behavioral Research, 27, 509-540.).

The eigenvalues for trivial, negligible factors in the real

data commonly surpass corresponding random data eigenvalues

for the same roots. The eigenvalues from parallel analyses

can be used to determine the real data eigenvalues that are

beyond chance, but additional procedures should then be used

to trim trivial factors.

Principal components eigenvalues are often used to determine

the number of common factors. This is the default in most statistical software packages, and it is the primary practice in the literature. It is also the method used by many factor analysis experts, including Cattell, who often examined principal components eigenvalues in his scree plots to determine the number of common factors. But others believe this common practice is wrong. Principal components eigenvalues are based on all of the variance in correlation matrices, including both the variance that is shared among variables and the variances that are unique to the variables. In contrast, principal axis eigenvalues are based solely on the shared variance among the variables. The two procedures are qualitatively different. Some therefore claim that the eigenvalues from one extraction method should not be used to determine the number of factors for the other extraction method. The issue remains neglected and unsettled.

----- END MATRIX -----

## **Korrelationen**







4.000000 .851853  
 5.000000 .748125  
 6.000000 .521581  
 7.000000 .442412  
 8.000000 .411793  
 9.000000 .338747  
 10.000000 .260013  
 11.000000 .220623  
 12.000000 .213141  
 13.000000 .162643  
 14.000000 .078000  
 15.000000 .060796  
 16.000000 .045386  
 17.000000 .020716  
 18.000000 -.016999  
 19.000000 -.029651  
 20.000000 -.048628  
 21.000000 -.063572  
 22.000000 -.095939  
 23.000000 -.105765  
 24.000000 -.138155  
 25.000000 -.141090  
 26.000000 -.162575  
 27.000000 -.174583  
 28.000000 -.194796  
 29.000000 -.214633

----- END MATRIX -----

## Correlation

### Listwise deletion

| Number of cases | Number of cases excluded |
|-----------------|--------------------------|
| 121             | 0                        |

## Number of Components/Factors

Number of Components/Factors estimated for the following

### Correlation Matrix

| Correlation Matrix       | Missing values |
|--------------------------|----------------|
| Heterogeneous (Two Step) | listwise       |

**Velicer's MAP values**

|    | Squared average partial correlations | 4th average partial correlations |
|----|--------------------------------------|----------------------------------|
| 0  | ,226                                 | ,060                             |
| 1  | ,021                                 | ,001                             |
| 2  | ,019                                 | ,001                             |
| 3  | ,019                                 | ,001                             |
| 4  | ,020                                 | ,001                             |
| 5  | ,020                                 | ,001                             |
| 6  | ,022                                 | ,001                             |
| 7  | ,024                                 | ,002                             |
| 8  | ,025                                 | ,002                             |
| 9  | ,027                                 | ,002                             |
| 10 | ,030                                 | ,003                             |
| 11 | ,033                                 | ,003                             |
| 12 | ,036                                 | ,004                             |
| 13 | ,040                                 | ,006                             |
| 14 | ,045                                 | ,007                             |
| 15 | ,050                                 | ,010                             |
| 16 | ,056                                 | ,011                             |
| 17 | ,063                                 | ,013                             |
| 18 | ,071                                 | ,016                             |
| 19 | ,082                                 | ,019                             |
| 20 | ,094                                 | ,025                             |
| 21 | ,110                                 | ,033                             |
| 22 | ,128                                 | ,040                             |
| 23 | ,151                                 | ,053                             |
| 24 | ,192                                 | ,085                             |
| 25 | ,238                                 | ,122                             |
| 26 | ,336                                 | ,198                             |
| 27 | ,500                                 | ,373                             |

**Velicer's Minimum Average Partial Test**

|               | Velicer's Minimum |                      |
|---------------|-------------------|----------------------|
|               | Minimum           | Components to retain |
| Squared MAP   | ,019              | 2                    |
| 4th power MAP | ,001              | 2                    |

FACTOR

/VARIABLES SWSRS\_prä\_aa\_2

```

SWSRS prä_aa_6 SWSRS prä_sm_1 SWSRS prä_sm_3 SWSRS prä_sm_7 SWSRS prä_sm_8
SWSRS akt_sk_1 SWSRS akt_sk_7
SWSRS akt_sk_15 SWSRS akt_sk_17
SWSRS akt_sk_19
SWSRS akt_sb_2 SWSRS akt_sb_4 SWSRS akt_sb_7
SWSRS akt_sb_9 SWSRS post_sb_1 SWSRS post_sb_3
SWSRS post_sb_4 SWSRS post_sr_2
SWSRS post_sr_4 SWSRS post_sr_6 SWSRS post_sr_7
/MISSING LISTWISE
/ANALYSIS SWSRS prä_aa_2
SWSRS prä_aa_6 SWSRS prä_sm_1 SWSRS prä_sm_3 SWSRS prä_sm_7 SWSRS prä_sm_8
SWSRS akt_sk_1 SWSRS akt_sk_7
SWSRS akt_sk_15 SWSRS akt_sk_17
SWSRS akt_sk_19
SWSRS akt_sb_2 SWSRS akt_sb_4 SWSRS akt_sb_7
SWSRS akt_sb_9 SWSRS post_sb_1 SWSRS post_sb_3
SWSRS post_sb_4 SWSRS post_sr_2
SWSRS post_sr_4 SWSRS post_sr_6 SWSRS post_sr_7
/PRINT UNIVARIATE INITIAL CORRELATION KMO REPR AIC EXTRACTION ROTATION
/PLOT EIGEN
/CRITERIA MINEIGEN(1) ITERATE(100)
/EXTRACTION PAF
/CRITERIA ITERATE(100)
/ROTATION PROMAX(4)
/METHOD=CORRELATION.

```

## Faktorenanalyse

**Deskriptive Statistiken**

|                                                                                                                                                                                    | Mittelwert | Standardabweichung | Analyse N |
|------------------------------------------------------------------------------------------------------------------------------------------------------------------------------------|------------|--------------------|-----------|
| <input type="checkbox"/> Ich kann mir konkrete Schreibziele setzen. ] Um Ihnen die Beantwortung zu erleichtern, können Sie die Antwort in Prozent geben                            | 7,05       | 2,866              | 121       |
| <input type="checkbox"/> Ich kann meine Ideen auch bei einem komplexen Thema gut organisieren. ] Um Ihnen die Beantwortung zu erleichtern, können Sie die Antwort in Prozent geben | 7,17       | 2,502              | 121       |
| <input type="checkbox"/> Ich kann mich dazu motivieren mit dem Schreiben anzufangen. ] Um Ihnen die Beantwortung zu erleichtern, können Sie die Antwort in Prozent geben           | 6,17       | 3,057              | 121       |
| <input type="checkbox"/> Ich kann Probleme, die beim Schreiben auftauchen, überwinden. ] Um Ihnen die Beantwortung zu erleichtern, können Sie die Antwort in Prozent geben         | 7,73       | 2,244              | 121       |
| <input type="checkbox"/> Ich kann Interesse für das Schreiben entwickeln. ] Um Ihnen die Beantwortung zu erleichtern, können Sie die Antwort in Prozent geben                      | 7,64       | 2,787              | 121       |
| <input type="checkbox"/> Ich kann leicht Wege finden mein Interesse am Schreiben zu steigern. ] Um Ihnen die Beantwortung zu erleichtern, können Sie die Antwort in Prozent geben  | 5,87       | 2,735              | 121       |
| <input type="checkbox"/> Ich kann mein Vorgehen beim Schreiben überwachen. ] Um Ihnen die Beantwortung zu erleichtern, können Sie die Antwort in Prozent geben                     | 6,28       | 2,829              | 121       |
| <input type="checkbox"/> Ich kann mich auf das Schreiben konzentrieren. ] Um Ihnen die Beantwortung zu erleichtern, können Sie die Antwort in Prozent geben                        | 7,54       | 2,717              | 121       |

### Deskriptive Statistiken

|                                                                                                                                                                                                           | Mittelwert | Standardabweichung | Analyse N |
|-----------------------------------------------------------------------------------------------------------------------------------------------------------------------------------------------------------|------------|--------------------|-----------|
| <input type="checkbox"/> Ich kann meine Schreibzeit effektiv nutzen. ] Um Ihnen die Beantwortung zu erleichtern, können Sie die Antwort in Prozent geben                                                  | 6,56       | 2,834              | 121       |
| <input type="checkbox"/> Ich kann mir meine Zeit so einteilen, dass ich konzentriert an meinem Text arbeite. ] Um Ihnen die Beantwortung zu erleichtern, können Sie die Antwort in Prozent geben          | 6,67       | 2,879              | 121       |
| <input type="checkbox"/> Ich kann mir meinen Schreibplatz so gestalten, dass ich ungestört schreiben kann. ] Um Ihnen die Beantwortung zu erleichtern, können Sie die Antwort in Prozent geben            | 7,31       | 3,019              | 121       |
| <input type="checkbox"/> Ich kann mein Vorgehen beim Schreiben ändern, wenn ich merke, dass es nicht erfolgreich ist. ] Um Ihnen die Beantwortung zu erleichtern, können Sie die Antwort in Prozent geben | 7,12       | 2,762              | 121       |
| <input type="checkbox"/> Ich kann mein Vorankommen beim Schreiben nachvollziehen. ] Um Ihnen die Beantwortung zu erleichtern, können Sie die Antwort in Prozent geben                                     | 7,79       | 2,474              | 121       |
| <input type="checkbox"/> Ich kann ausdauernd an meinem Text arbeiten. ] Um Ihnen die Beantwortung zu erleichtern, können Sie die Antwort in Prozent geben                                                 | 7,32       | 2,905              | 121       |
| <input type="checkbox"/> Ich kann eine Schreibblockade lösen und danach weiterschreiben. ] Um Ihnen die Beantwortung zu erleichtern, können Sie die Antwort in Prozent geben                              | 6,40       | 2,651              | 121       |
| <input type="checkbox"/> Ich kann die Qualität meines Textes realistisch einschätzen. ] Um Ihnen die Beantwortung zu erleichtern, können Sie die Antwort in Prozent geben                                 | 7,49       | 2,589              | 121       |

Deskriptive Statistiken

|                                                                                                                                                                                                       | Mittelwert | Standardabweichung | Analyse N |
|-------------------------------------------------------------------------------------------------------------------------------------------------------------------------------------------------------|------------|--------------------|-----------|
| <input type="checkbox"/> Ich kann die von mir selbst gesetzten Kriterien für die Qualität meiner Texte erreichen. ] Um Ihnen die Beantwortung zu erleichtern, können Sie die Antwort in Prozent geben | 7,84       | 2,429              | 121       |
| <input type="checkbox"/> Ich kann die von mir selbst gesetzten Teilziele beim Schreiben erreichen. ] Um Ihnen die Beantwortung zu erleichtern, können Sie die Antwort in Prozent geben                | 7,19       | 2,919              | 121       |
| <input type="checkbox"/> Ich kann ein gutes Gefühl für das Vorankommen beim Schreiben entwickeln. ] Um Ihnen die Beantwortung zu erleichtern, können Sie die Antwort in Prozent geben                 | 7,20       | 2,747              | 121       |
| <input type="checkbox"/> Ich kann vermeiden, dass ich einen Fehler beim nächsten Mal wieder mache. ] Um Ihnen die Beantwortung zu erleichtern, können Sie die Antwort in Prozent geben                | 7,60       | 2,594              | 121       |
| <input type="checkbox"/> Ich kann mein Vorgehen bei Schreibprojekten durch Erfahrung verbessern. ] Um Ihnen die Beantwortung zu erleichtern, können Sie die Antwort in Prozent geben                  | 7,97       | 2,674              | 121       |
| <input type="checkbox"/> Ich kann einschätzen, was ich beim nächsten Mal anders machen muss. ] Um Ihnen die Beantwortung zu erleichtern, können Sie die Antwort in Prozent geben                      | 7,46       | 2,513              | 121       |













Anti-Image-Matrizen

|                                                                                                                                  |                                                                                                                                                             |                                                                                                                                               |                                                                                                                                                            |                                                                                                                                         |                                                                                                                                      |                                                                                                                                   |                                                                                                                                                                       |                                                                                                                                                                         |                                                                                                                                                                    |                                                                                                                                           |                                                                                                                                    |                                                                                                                                                       |                                                                                                                                        |                                                                                                                                                                                |                                                                                                                                                                 |                                                                                                                                                                |                                                                                                                                                                 |                                                                                                                                                               |                                                                                                                                                           |
|----------------------------------------------------------------------------------------------------------------------------------|-------------------------------------------------------------------------------------------------------------------------------------------------------------|-----------------------------------------------------------------------------------------------------------------------------------------------|------------------------------------------------------------------------------------------------------------------------------------------------------------|-----------------------------------------------------------------------------------------------------------------------------------------|--------------------------------------------------------------------------------------------------------------------------------------|-----------------------------------------------------------------------------------------------------------------------------------|-----------------------------------------------------------------------------------------------------------------------------------------------------------------------|-------------------------------------------------------------------------------------------------------------------------------------------------------------------------|--------------------------------------------------------------------------------------------------------------------------------------------------------------------|-------------------------------------------------------------------------------------------------------------------------------------------|------------------------------------------------------------------------------------------------------------------------------------|-------------------------------------------------------------------------------------------------------------------------------------------------------|----------------------------------------------------------------------------------------------------------------------------------------|--------------------------------------------------------------------------------------------------------------------------------------------------------------------------------|-----------------------------------------------------------------------------------------------------------------------------------------------------------------|----------------------------------------------------------------------------------------------------------------------------------------------------------------|-----------------------------------------------------------------------------------------------------------------------------------------------------------------|---------------------------------------------------------------------------------------------------------------------------------------------------------------|-----------------------------------------------------------------------------------------------------------------------------------------------------------|
| [ Ich kann mir konkrete Schreibziele setzen. ] Um Ihnen die Beantwortung zu erleichtern, können Sie die Antwort in Prozent geben | [ Ich kann meine Ideen auch bei einem komplexen Thema gut organisieren. ] Um Ihnen die Beantwortung zu erleichtern, können Sie die Antwort in Prozent geben | [ Ich kann mich dazu motivieren dem Schreiben anzufangen. ] Um Ihnen die Beantwortung zu erleichtern, können Sie die Antwort in Prozent geben | [ Ich kann leicht Wege finden mein Interesse am Schreiben zu steigern. ] Um Ihnen die Beantwortung zu erleichtern, können Sie die Antwort in Prozent geben | [ Ich kann beim Vorgehen mein Vorgehen überwatchen. ] Um Ihnen die Beantwortung zu erleichtern, können Sie die Antwort in Prozent geben | [ Ich kann mich auf das Schreiben konzentrieren. ] Um Ihnen die Beantwortung zu erleichtern, können Sie die Antwort in Prozent geben | [ Ich kann meine Schreibzeit effektiv nutzen. ] Um Ihnen die Beantwortung zu erleichtern, können Sie die Antwort in Prozent geben | [ Ich kann meine Zeit so einteilen, dass ich konzentriert an meinem Text arbeite. ] Um Ihnen die Beantwortung zu erleichtern, können Sie die Antwort in Prozent geben | [ Ich kann mir meinen Schreibplatz so gestalten, dass ich ungestört schreiben kann. ] Um Ihnen die Beantwortung zu erleichtern, können Sie die Antwort in Prozent geben | [ Ich kann beim Vorgehen meine Vorgehen ändern, wenn es nicht erfolgreich ist. ] Um Ihnen die Beantwortung zu erleichtern, können Sie die Antwort in Prozent geben | [ Ich kann beim Schreiben Vorankommen nachvollziehen. ] Um Ihnen die Beantwortung zu erleichtern, können Sie die Antwort in Prozent geben | [ Ich kann ausdauernd an meinem Text arbeiten. ] Um Ihnen die Beantwortung zu erleichtern, können Sie die Antwort in Prozent geben | [ Ich kann eine Schreibblockade lösen und danach weiterschreiben. ] Um Ihnen die Beantwortung zu erleichtern, können Sie die Antwort in Prozent geben | [ Ich kann die Qualität meines Textes einschätzen. ] Um Ihnen die Beantwortung zu erleichtern, können Sie die Antwort in Prozent geben | [ Ich kann die von mir selbst gesetzten Kriterien für die Qualität meiner Texte erreichen. ] Um Ihnen die Beantwortung zu erleichtern, können Sie die Antwort in Prozent geben | [ Ich kann die von mir selbst gesetzten Teilziele beim Schreiben erreichen. ] Um Ihnen die Beantwortung zu erleichtern, können Sie die Antwort in Prozent geben | [ Ich kann ein gutes Gefühl für das Vorankommen beim Schreiben entwickeln. ] Um Ihnen die Beantwortung zu erleichtern, können Sie die Antwort in Prozent geben | [ Ich kann vermeiden, dass ich einen Fehler beim nächsten Mal wieder mache. ] Um Ihnen die Beantwortung zu erleichtern, können Sie die Antwort in Prozent geben | [ Ich kann mein Vorgehen bei Schreibprojekten durch Erfahrung verbessern. ] Um Ihnen die Beantwortung zu erleichtern, können Sie die Antwort in Prozent geben | [ Ich kann einschätzen, was ich beim nächsten Mal anders machen muss. ] Um Ihnen die Beantwortung zu erleichtern, können Sie die Antwort in Prozent geben |
| -0,056                                                                                                                           | ,079                                                                                                                                                        | ,072                                                                                                                                          | ,015                                                                                                                                                       | ,055                                                                                                                                    | ,007                                                                                                                                 | -0,053                                                                                                                            | -0,220                                                                                                                                                                | -0,124                                                                                                                                                                  | -0,013                                                                                                                                                             | ,089                                                                                                                                      | ,205                                                                                                                               | ,029                                                                                                                                                  | -0,026                                                                                                                                 | -0,053                                                                                                                                                                         | -0,079                                                                                                                                                          | -0,078                                                                                                                                                         | -0,281                                                                                                                                                          | ,944 <sup>a</sup>                                                                                                                                             | -1,188                                                                                                                                                    |
| ,138                                                                                                                             | ,148                                                                                                                                                        | -0,083                                                                                                                                        | -0,073                                                                                                                                                     | -0,260                                                                                                                                  | -0,101                                                                                                                               | ,033                                                                                                                              | -0,136                                                                                                                                                                | ,032                                                                                                                                                                    | -0,144                                                                                                                                                             | ,019                                                                                                                                      | ,007                                                                                                                               | ,039                                                                                                                                                  | -0,109                                                                                                                                 | ,006                                                                                                                                                                           | -0,059                                                                                                                                                          | ,117                                                                                                                                                           | -0,216                                                                                                                                                          | -1,188                                                                                                                                                        | ,936 <sup>b</sup>                                                                                                                                         |

a. Maß der Stichprobeneignung

Kommunalitäten

|                                                                                                                                                             | Anfänglich | Extraktion |
|-------------------------------------------------------------------------------------------------------------------------------------------------------------|------------|------------|
| [ Ich kann mir konkrete Schreibziele setzen. ] Um Ihnen die Beantwortung zu erleichtern, können Sie die Antwort in Prozent geben                            | ,454       | ,338       |
| [ Ich kann meine Ideen auch bei einem komplexen Thema gut organisieren. ] Um Ihnen die Beantwortung zu erleichtern, können Sie die Antwort in Prozent geben | ,569       | ,420       |
| [ Ich kann mich dazu motivieren dem Schreiben anzufangen. ] Um Ihnen die Beantwortung zu erleichtern, können Sie die Antwort in Prozent geben               | ,449       | ,439       |
| [ Ich kann leicht Wege finden mein Interesse am Schreiben zu steigern. ] Um Ihnen die Beantwortung zu erleichtern, können Sie die Antwort in Prozent geben  | ,608       | ,581       |

**Kommunalitäten**

|                                                                                                                                                                                    | Anfänglich | Extraktion |
|------------------------------------------------------------------------------------------------------------------------------------------------------------------------------------|------------|------------|
| [ Ich kann Interesse für das Schreiben entwickeln. ] Um Ihnen die Beantwortung zu erleichtern, können Sie die Antwort in Prozent geben                                             | ,538       | ,436       |
| [ Ich kann leicht Wege finden mein Interesse am Schreiben zu steigern. ] Um Ihnen die Beantwortung zu erleichtern, können Sie die Antwort in Prozent geben                         | ,556       | ,530       |
| [ Ich kann mein Vorgehen beim Schreiben überwachen. ] Um Ihnen die Beantwortung zu erleichtern, können Sie die Antwort in Prozent geben                                            | ,518       | ,442       |
| [ Ich kann mich auf das Schreiben konzentrieren. ] Um Ihnen die Beantwortung zu erleichtern, können Sie die Antwort in Prozent geben                                               | ,680       | ,660       |
| [ Ich kann meine Schreibzeit effektiv nutzen. ] Um Ihnen die Beantwortung zu erleichtern, können Sie die Antwort in Prozent geben                                                  | ,651       | ,617       |
| [ Ich kann mir meine Zeit so einteilen, dass ich konzentriert an meinem Text arbeite. ] Um Ihnen die Beantwortung zu erleichtern, können Sie die Antwort in Prozent geben          | ,759       | ,682       |
| [ Ich kann mir meinen Schreibplatz so gestalten, dass ich ungestört schreiben kann. ] Um Ihnen die Beantwortung zu erleichtern, können Sie die Antwort in Prozent geben            | ,504       | ,433       |
| [ Ich kann mein Vorgehen beim Schreiben ändern, wenn ich merke, dass es nicht erfolgreich ist. ] Um Ihnen die Beantwortung zu erleichtern, können Sie die Antwort in Prozent geben | ,659       | ,651       |

**Kommunalitäten**

|                                                                                                                                                                                | Anfänglich | Extraktion |
|--------------------------------------------------------------------------------------------------------------------------------------------------------------------------------|------------|------------|
| [ Ich kann mein Vorankommen beim Schreiben nachvollziehen. ]<br>Um Ihnen die Beantwortung zu erleichtern, können Sie die Antwort in Prozent geben                              | ,731       | ,629       |
| [ Ich kann ausdauernd an meinem Text arbeiten. ] Um Ihnen die Beantwortung zu erleichtern, können Sie die Antwort in Prozent geben                                             | ,638       | ,585       |
| [ Ich kann eine Schreibblockade lösen und danach weiterschreiben. ] Um Ihnen die Beantwortung zu erleichtern, können Sie die Antwort in Prozent geben                          | ,553       | ,490       |
| [ Ich kann die Qualität meines Textes realistisch einschätzen. ] Um Ihnen die Beantwortung zu erleichtern, können Sie die Antwort in Prozent geben                             | ,606       | ,643       |
| [ Ich kann die von mir selbst gesetzten Kriterien für die Qualität meiner Texte erreichen. ] Um Ihnen die Beantwortung zu erleichtern, können Sie die Antwort in Prozent geben | ,690       | ,674       |
| [ Ich kann die von mir selbst gesetzten Teilziele beim Schreiben erreichen. ] Um Ihnen die Beantwortung zu erleichtern, können Sie die Antwort in Prozent geben                | ,634       | ,576       |
| [ Ich kann ein gutes Gefühl für das Vorankommen beim Schreiben entwickeln. ] Um Ihnen die Beantwortung zu erleichtern, können Sie die Antwort in Prozent geben                 | ,746       | ,651       |
| [ Ich kann vermeiden, dass ich einen Fehler beim nächsten Mal wieder mache. ] Um Ihnen die Beantwortung zu erleichtern, können Sie die Antwort in Prozent geben                | ,655       | ,612       |



**Kommunalitäten**

|                                                                                                                                                               | Anfänglich | Extraktion |
|---------------------------------------------------------------------------------------------------------------------------------------------------------------|------------|------------|
| [ Ich kann mein Vorgehen bei Schreibprojekten durch Erfahrung verbessern. ] Um Ihnen die Beantwortung zu erleichtern, können Sie die Antwort in Prozent geben | ,577       | ,594       |
| [ Ich kann einschätzen, was ich beim nächsten Mal anders machen muss. ] Um Ihnen die Beantwortung zu erleichtern, können Sie die Antwort in Prozent geben     | ,533       | ,470       |

Extraktionsmethode: Hauptachsen-Faktorenanalyse.

**Erklärte Gesamtvarianz**

| Faktor | Anfängliche Eigenwerte |               | Summen von quadrierten Faktorladungen für Extraktion |               |              | Rotierte Summe der quadrierten Ladungen <sup>a</sup> |
|--------|------------------------|---------------|------------------------------------------------------|---------------|--------------|------------------------------------------------------|
|        | Gesamt                 | % der Varianz | Gesamt                                               | % der Varianz | Kumulierte % |                                                      |
| 1      | 11,052                 | 50,236        | 10,623                                               | 48,285        | 48,285       | 9,184                                                |
| 2      | 1,304                  | 5,926         | ,851                                                 | 3,868         | 52,153       | 9,042                                                |
| 3      | 1,124                  | 5,110         | ,680                                                 | 3,092         | 55,245       | 7,164                                                |
| 4      | ,911                   | 4,142         |                                                      |               |              |                                                      |
| 5      | ,825                   | 3,748         |                                                      |               |              |                                                      |
| 6      | ,774                   | 3,518         |                                                      |               |              |                                                      |
| 7      | ,687                   | 3,123         |                                                      |               |              |                                                      |
| 8      | ,631                   | 2,870         |                                                      |               |              |                                                      |
| 9      | ,609                   | 2,768         |                                                      |               |              |                                                      |
| 10     | ,528                   | 2,401         |                                                      |               |              |                                                      |
| 11     | ,487                   | 2,213         |                                                      |               |              |                                                      |
| 12     | ,405                   | 1,839         |                                                      |               |              |                                                      |
| 13     | ,387                   | 1,759         |                                                      |               |              |                                                      |
| 14     | ,354                   | 1,609         |                                                      |               |              |                                                      |
| 15     | ,327                   | 1,485         |                                                      |               |              |                                                      |
| 16     | ,316                   | 1,435         |                                                      |               |              |                                                      |
| 17     | ,275                   | 1,252         |                                                      |               |              |                                                      |
| 18     | ,259                   | 1,178         |                                                      |               |              |                                                      |
| 19     | ,237                   | 1,079         |                                                      |               |              |                                                      |
| 20     | ,214                   | ,973          |                                                      |               |              |                                                      |
| 21     | ,175                   | ,798          |                                                      |               |              |                                                      |
| 22     | ,118                   | ,536          |                                                      |               |              |                                                      |
|        |                        | 100,000       |                                                      |               |              |                                                      |

Extraktionsmethode: Hauptachsen-Faktorenanalyse.

a. Wenn Faktoren korreliert sind, können die Summen der quadrierten Ladungen nicht addiert werden, um eine Gesamtvarianz zu erhalten.

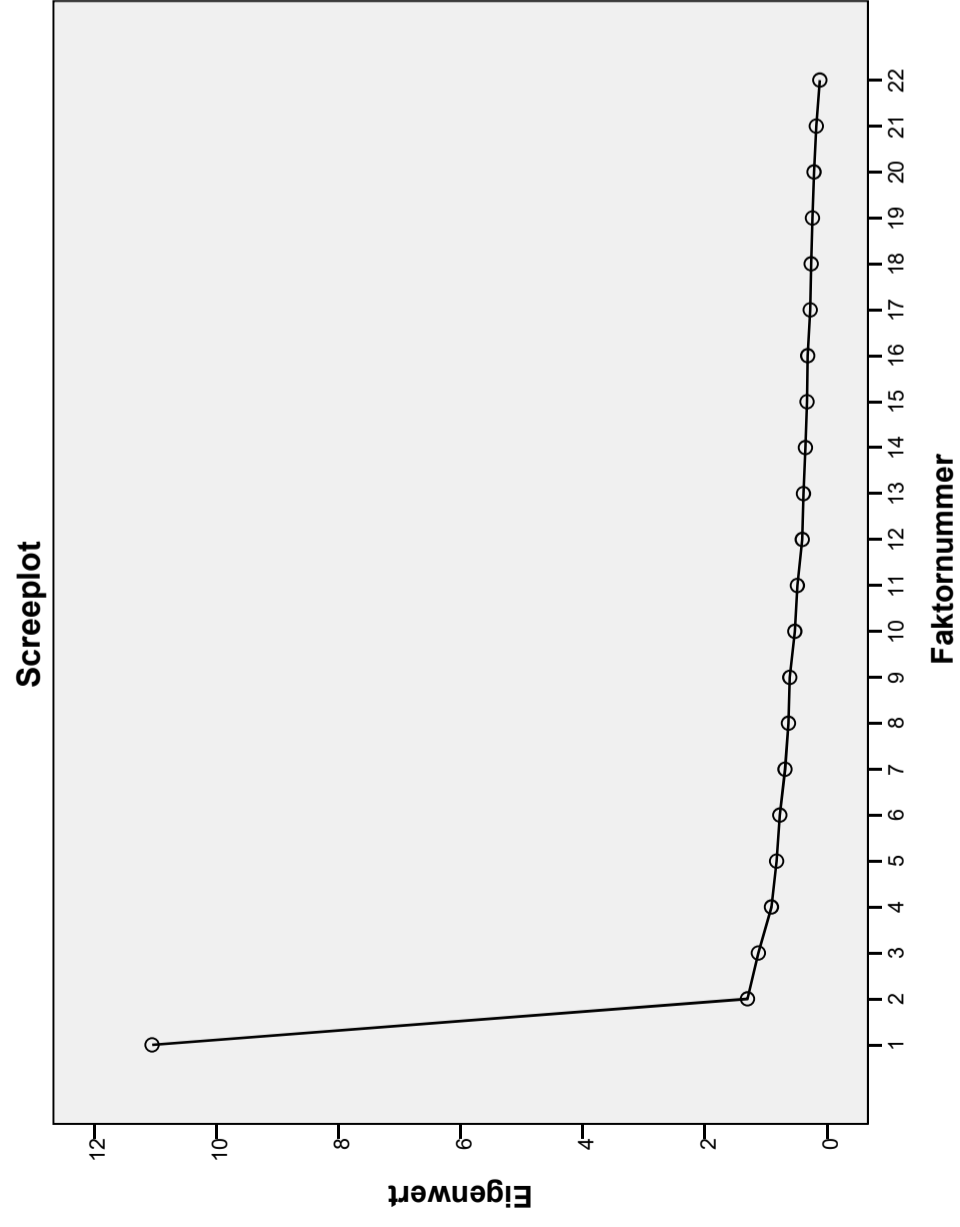

Faktorenmatrix<sup>a</sup>

|                                                                                                                                                             | Faktor |       |       |
|-------------------------------------------------------------------------------------------------------------------------------------------------------------|--------|-------|-------|
|                                                                                                                                                             | 1      | 2     | 3     |
| [ Ich kann mir konkrete Schreibziele setzen. ] Um Ihnen die Beantwortung zu erleichtern, können Sie die Antwort in Prozent geben                            | ,574   | ,084  | -,039 |
| [ Ich kann meine Ideen auch bei einem komplexen Thema gut organisieren. ] Um Ihnen die Beantwortung zu erleichtern, können Sie die Antwort in Prozent geben | ,622   | -,145 | ,111  |
| [ Ich kann mich dazu motivieren mit dem Schreiben anzufangen. ] Um Ihnen die Beantwortung zu erleichtern, können Sie die Antwort in Prozent geben           | ,489   | ,447  | -,008 |
| [ Ich kann Probleme, die beim Schreiben auftauchen, überwinden. ] Um Ihnen die Beantwortung zu erleichtern, können Sie die Antwort in Prozent geben         | ,672   | -,106 | ,344  |
| [ Ich kann Interesse für das Schreiben entwickeln. ] Um Ihnen die Beantwortung zu erleichtern, können Sie die Antwort in Prozent geben                      | ,616   | ,153  | ,183  |
| [ Ich kann leicht Wege finden mein Interesse am Schreiben zu steigern. ] Um Ihnen die Beantwortung zu erleichtern, können Sie die Antwort in Prozent geben  | ,627   | ,369  | ,013  |
| [ Ich kann mein Vorgehen beim Schreiben überwachen. ] Um Ihnen die Beantwortung zu erleichtern, können Sie die Antwort in Prozent geben                     | ,659   | ,006  | ,089  |
| [ Ich kann mich auf das Schreiben konzentrieren. ] Um Ihnen die Beantwortung zu erleichtern, können Sie die Antwort in Prozent geben                        | ,789   | ,194  | -,023 |

Faktorenmatrix<sup>a</sup>

|                                                                                                                                                                                    | Faktor |       |       |
|------------------------------------------------------------------------------------------------------------------------------------------------------------------------------------|--------|-------|-------|
|                                                                                                                                                                                    | 1      | 2     | 3     |
| [ Ich kann meine Schreibzeit effektiv nutzen. ] Um Ihnen die Beantwortung zu erleichtern, können Sie die Antwort in Prozent geben                                                  | ,764   | -,018 | -,183 |
| [ Ich kann mir meine Zeit so einteilen, dass ich konzentriert an meinem Text arbeite. ] Um Ihnen die Beantwortung zu erleichtern, können Sie die Antwort in Prozent geben          | ,783   | ,101  | -,244 |
| [ Ich kann mir meinen Schreibplatz so gestalten, dass ich ungestört schreiben kann. ] Um Ihnen die Beantwortung zu erleichtern, können Sie die Antwort in Prozent geben            | ,622   | ,118  | -,180 |
| [ Ich kann mein Vorgehen beim Schreiben ändern, wenn ich merke, dass es nicht erfolgreich ist. ] Um Ihnen die Beantwortung zu erleichtern, können Sie die Antwort in Prozent geben | ,776   | -,221 | ,018  |
| [ Ich kann mein Vorankommen beim Schreiben nachvollziehen. ] Um Ihnen die Beantwortung zu erleichtern, können Sie die Antwort in Prozent geben                                     | ,766   | -,185 | ,096  |
| [ Ich kann ausdauernd an meinem Text arbeiten. ] Um Ihnen die Beantwortung zu erleichtern, können Sie die Antwort in Prozent geben                                                 | ,739   | ,112  | ,162  |
| [ Ich kann eine Schreibblockade lösen und danach weiterschreiben. ] Um Ihnen die Beantwortung zu erleichtern, können Sie die Antwort in Prozent geben                              | ,639   | ,001  | ,286  |
| [ Ich kann die Qualität meines Textes realistisch einschätzen. ] Um Ihnen die Beantwortung zu erleichtern, können Sie die Antwort in Prozent geben                                 | ,633   | -,491 | -,038 |

Faktorenmatrix<sup>a</sup>

|                                                                                                                                                                                | Faktor |       |       |
|--------------------------------------------------------------------------------------------------------------------------------------------------------------------------------|--------|-------|-------|
|                                                                                                                                                                                | 1      | 2     | 3     |
| [ Ich kann die von mir selbst gesetzten Kriterien für die Qualität meiner Texte erreichen. ] Um Ihnen die Beantwortung zu erleichtern, können Sie die Antwort in Prozent geben | ,784   | -,058 | ,237  |
| [ Ich kann die von mir selbst gesetzten Teilziele beim Schreiben erreichen. ] Um Ihnen die Beantwortung zu erleichtern, können Sie die Antwort in Prozent geben                | ,756   | ,071  | -,007 |
| [ Ich kann ein gutes Gefühl für das Vorankommen beim Schreiben entwickeln. ] Um Ihnen die Beantwortung zu erleichtern, können Sie die Antwort in Prozent geben                 | ,805   | ,041  | -,031 |
| [ Ich kann vermeiden, dass ich einen Fehler beim nächsten Mal wieder mache. ] Um Ihnen die Beantwortung zu erleichtern, können Sie die Antwort in Prozent geben                | ,742   | -,182 | -,169 |
| [ Ich kann mein Vorgehen bei Schreibprojekten durch Erfahrung verbessern. ] Um Ihnen die Beantwortung zu erleichtern, können Sie die Antwort in Prozent geben                  | ,684   | -,087 | -,345 |
| [ Ich kann einschätzen, was ich beim nächsten Mal anders machen muss. ] Um Ihnen die Beantwortung zu erleichtern, können Sie die Antwort in Prozent geben                      | ,641   | -,053 | -,239 |

Extraktionsmethode: Hauptachsensfaktorenanalyse.

a. 3 Faktoren extrahiert. Es werden 7 Iterationen benötigt.

Reproduzierte Korrelationen

| [ Ich kann mir konkrete Schreibziele setzen. ] Um Ihnen die Beantwortung zu erleichtern, können Sie die Antwort in Prozent geben | [ Ich kann meine Ideen auch bei einem komplexen Thema gut organisieren. ] Um Ihnen die Beantwortung zu erleichtern, können Sie die Antwort in Prozent geben | [ Ich kann mich dazu motivieren mit dem Schreiben anzufangen. ] Um Ihnen die Beantwortung zu erleichtern, können Sie die Antwort in Prozent geben | [ Ich kann Probleme, die beim Schreiben aufkommen, überwinden. ] Um Ihnen die Beantwortung zu erleichtern, können Sie die Antwort in Prozent geben | [ Ich kann leicht Wege finden mein Interesse am Schreiben zu steigern. ] Um Ihnen die Beantwortung zu erleichtern, können Sie die Antwort in Prozent geben | [ Ich kann mich auf das Schreiben konzentrieren. ] Um Ihnen die Beantwortung zu erleichtern, können Sie die Antwort in Prozent geben | [ Ich kann meine Schreibzeit effektiv nutzen. ] Um Ihnen die Beantwortung zu erleichtern, können Sie die Antwort in Prozent geben | [ Ich kann mir meine Zeit so einteilen, dass ich konzentriert an meiner Text arbeite. ] Um Ihnen die Beantwortung zu erleichtern, können Sie die Antwort in Prozent geben | [ Ich kann mir meinen Schreibplatz so gestalten, dass ich ungestört schreiben kann. ] Um Ihnen die Beantwortung zu erleichtern, können Sie die Antwort in Prozent geben | [ Ich kann mein Vorgehen beim Schreiben ändern, wenn ich merke, dass es nicht erfolgreich ist. ] Um Ihnen die Beantwortung zu erleichtern, können Sie die Antwort in Prozent geben | [ Ich kann mein Vorankommen beim Schreiben nachvollziehen. ] Um Ihnen die Beantwortung zu erleichtern, können Sie die Antwort in Prozent geben | [ Ich kann mein Text ausdauernd anarbeiten. ] Um Ihnen die Beantwortung zu erleichtern, können Sie die Antwort in Prozent geben | [ Ich kann eine Schreibblockade lösen und danach weiterschreiben. ] Um Ihnen die Beantwortung zu erleichtern, können Sie die Antwort in Prozent geben | [ Ich kann die Qualität meines Textes realistisch einschätzen. ] Um Ihnen die Beantwortung zu erleichtern, können Sie die Antwort in Prozent geben | [ Ich kann die von mir selbst gesetzten Kriterien für die Qualität meiner Texte erreichen. ] Um Ihnen die Beantwortung zu erleichtern, können Sie die Antwort in Prozent geben | [ Ich kann die von mir selbst gesetzten Teilziele beim Schreiben erreichen. ] Um Ihnen die Beantwortung zu erleichtern, können Sie die Antwort in Prozent geben | [ Ich kann ein gutes Gefühl für das Vorankommen beim Schreiben entwickeln. ] Um Ihnen die Beantwortung zu erleichtern, können Sie die Antwort in Prozent geben | [ Ich kann vermeiden, dass ich einen Fehler beim nächsten Mal wieder mache. ] Um Ihnen die Beantwortung zu erleichtern, können Sie die Antwort in Prozent geben | [ Ich kann mein Vorgehen bei Schreibprojekten durch Erfahrung verbessern. ] Um Ihnen die Beantwortung zu erleichtern, können Sie die Antwort in Prozent geben | [ Ich kann einschätzen, was ich beim nächsten Mal anders machen muss. ] Um Ihnen die Beantwortung zu erleichtern, können Sie die Antwort in Prozent geben |
|----------------------------------------------------------------------------------------------------------------------------------|-------------------------------------------------------------------------------------------------------------------------------------------------------------|---------------------------------------------------------------------------------------------------------------------------------------------------|----------------------------------------------------------------------------------------------------------------------------------------------------|------------------------------------------------------------------------------------------------------------------------------------------------------------|--------------------------------------------------------------------------------------------------------------------------------------|-----------------------------------------------------------------------------------------------------------------------------------|---------------------------------------------------------------------------------------------------------------------------------------------------------------------------|-------------------------------------------------------------------------------------------------------------------------------------------------------------------------|------------------------------------------------------------------------------------------------------------------------------------------------------------------------------------|------------------------------------------------------------------------------------------------------------------------------------------------|---------------------------------------------------------------------------------------------------------------------------------|-------------------------------------------------------------------------------------------------------------------------------------------------------|----------------------------------------------------------------------------------------------------------------------------------------------------|--------------------------------------------------------------------------------------------------------------------------------------------------------------------------------|-----------------------------------------------------------------------------------------------------------------------------------------------------------------|----------------------------------------------------------------------------------------------------------------------------------------------------------------|-----------------------------------------------------------------------------------------------------------------------------------------------------------------|---------------------------------------------------------------------------------------------------------------------------------------------------------------|-----------------------------------------------------------------------------------------------------------------------------------------------------------|
| .338 <sup>a</sup>                                                                                                                | .340                                                                                                                                                        | .319                                                                                                                                              | .363                                                                                                                                               | .391                                                                                                                                                       | .470                                                                                                                                 | .444                                                                                                                              | .467                                                                                                                                                                      | .374                                                                                                                                                                    | .426                                                                                                                                                                               | .420                                                                                                                                           | .427                                                                                                                            | .356                                                                                                                                                  | .324                                                                                                                                               | .436                                                                                                                                                                           | .440                                                                                                                                                            | .467                                                                                                                                                           | .417                                                                                                                                                            | .399                                                                                                                                                          | .373                                                                                                                                                      |
| .340                                                                                                                             | .420 <sup>a</sup>                                                                                                                                           | .238                                                                                                                                              | .471                                                                                                                                               | .338                                                                                                                                                       | .460                                                                                                                                 | .457                                                                                                                              | .445                                                                                                                                                                      | .350                                                                                                                                                                    | .517                                                                                                                                                                               | .513                                                                                                                                           | .461                                                                                                                            | .429                                                                                                                                                  | .461                                                                                                                                               | .522                                                                                                                                                                           | .459                                                                                                                                                            | .481                                                                                                                                                           | .469                                                                                                                                                            | .389                                                                                                                                                          | .380                                                                                                                                                      |
| .319                                                                                                                             | .238                                                                                                                                                        | .439 <sup>a</sup>                                                                                                                                 | .278                                                                                                                                               | .471                                                                                                                                                       | .473                                                                                                                                 | .367                                                                                                                              | .430                                                                                                                                                                      | .358                                                                                                                                                                    | .281                                                                                                                                                                               | .291                                                                                                                                           | .410                                                                                                                            | .310                                                                                                                                                  | .090                                                                                                                                               | .355                                                                                                                                                                           | .401                                                                                                                                                            | .412                                                                                                                                                           | .282                                                                                                                                                            | .299                                                                                                                                                          | .292                                                                                                                                                      |
| .363                                                                                                                             | .471                                                                                                                                                        | .278                                                                                                                                              | .581 <sup>a</sup>                                                                                                                                  | .387                                                                                                                                                       | .501                                                                                                                                 | .452                                                                                                                              | .431                                                                                                                                                                      | .344                                                                                                                                                                    | .551                                                                                                                                                                               | .567                                                                                                                                           | .540                                                                                                                            | .527                                                                                                                                                  | .464                                                                                                                                               | .614                                                                                                                                                                           | .498                                                                                                                                                            | .526                                                                                                                                                           | .459                                                                                                                                                            | .350                                                                                                                                                          | .354                                                                                                                                                      |
| .359                                                                                                                             | .381                                                                                                                                                        | .368                                                                                                                                              | .460                                                                                                                                               | .445                                                                                                                                                       | .511                                                                                                                                 | .434                                                                                                                              | .453                                                                                                                                                                      | .368                                                                                                                                                                    | .447                                                                                                                                                                               | .461                                                                                                                                           | .502                                                                                                                            | .446                                                                                                                                                  | .308                                                                                                                                               | .517                                                                                                                                                                           | .475                                                                                                                                                            | .496                                                                                                                                                           | .398                                                                                                                                                            | .344                                                                                                                                                          | .343                                                                                                                                                      |
| .391                                                                                                                             | .338                                                                                                                                                        | .471                                                                                                                                              | .387                                                                                                                                               | .530 <sup>a</sup>                                                                                                                                          | .417                                                                                                                                 | .470                                                                                                                              | .525                                                                                                                                                                      | .431                                                                                                                                                                    | .406                                                                                                                                                                               | .413                                                                                                                                           | .507                                                                                                                            | .405                                                                                                                                                  | .215                                                                                                                                               | .474                                                                                                                                                                           | .500                                                                                                                                                            | .520                                                                                                                                                           | .396                                                                                                                                                            | .382                                                                                                                                                          | .379                                                                                                                                                      |
| .375                                                                                                                             | .418                                                                                                                                                        | .324                                                                                                                                              | .472                                                                                                                                               | .417                                                                                                                                                       | .519                                                                                                                                 | .487                                                                                                                              | .484                                                                                                                                                                      | .395                                                                                                                                                                    | .512                                                                                                                                                                               | .512                                                                                                                                           | .502                                                                                                                            | .446                                                                                                                                                  | .411                                                                                                                                               | .537                                                                                                                                                                           | .497                                                                                                                                                            | .528                                                                                                                                                           | .472                                                                                                                                                            | .419                                                                                                                                                          | .400                                                                                                                                                      |
| .470                                                                                                                             | .460                                                                                                                                                        | .473                                                                                                                                              | .501                                                                                                                                               | .566                                                                                                                                                       | .660 <sup>a</sup>                                                                                                                    | .603                                                                                                                              | .643                                                                                                                                                                      | .518                                                                                                                                                                    | .569                                                                                                                                                                               | .586                                                                                                                                           | .601                                                                                                                            | .498                                                                                                                                                  | .405                                                                                                                                               | .602                                                                                                                                                                           | .610                                                                                                                                                            | .644                                                                                                                                                           | .553                                                                                                                                                            | .530                                                                                                                                                          | .501                                                                                                                                                      |
| .444                                                                                                                             | .457                                                                                                                                                        | .367                                                                                                                                              | .452                                                                                                                                               | .470                                                                                                                                                       | .603                                                                                                                                 | .617 <sup>a</sup>                                                                                                                 | .641                                                                                                                                                                      | .506                                                                                                                                                                    | .583                                                                                                                                                                               | .570                                                                                                                                           | .533                                                                                                                            | .435                                                                                                                                                  | .499                                                                                                                                               | .556                                                                                                                                                                           | .577                                                                                                                                                            | .620                                                                                                                                                           | .600                                                                                                                                                            | .587                                                                                                                                                          | .534                                                                                                                                                      |
| .467                                                                                                                             | .445                                                                                                                                                        | .430                                                                                                                                              | .431                                                                                                                                               | .525                                                                                                                                                       | .643                                                                                                                                 | .641                                                                                                                              | .682 <sup>a</sup>                                                                                                                                                         | .543                                                                                                                                                                    | .581                                                                                                                                                                               | .567                                                                                                                                           | .550                                                                                                                            | .430                                                                                                                                                  | .455                                                                                                                                               | .550                                                                                                                                                                           | .600                                                                                                                                                            | .642                                                                                                                                                           | .603                                                                                                                                                            | .611                                                                                                                                                          | .554                                                                                                                                                      |
| .374                                                                                                                             | .350                                                                                                                                                        | .368                                                                                                                                              | .344                                                                                                                                               | .431                                                                                                                                                       | .518                                                                                                                                 | .506                                                                                                                              | .543                                                                                                                                                                      | .433 <sup>a</sup>                                                                                                                                                       | .454                                                                                                                                                                               | .437                                                                                                                                           | .444                                                                                                                            | .346                                                                                                                                                  | .343                                                                                                                                               | .439                                                                                                                                                                           | .480                                                                                                                                                            | .512                                                                                                                                                           | .470                                                                                                                                                            | .477                                                                                                                                                          | .435                                                                                                                                                      |
| .426                                                                                                                             | .517                                                                                                                                                        | .281                                                                                                                                              | .551                                                                                                                                               | .406                                                                                                                                                       | .569                                                                                                                                 | .581                                                                                                                              | .651 <sup>a</sup>                                                                                                                                                         | .454                                                                                                                                                                    | .637                                                                                                                                                                               | .629 <sup>a</sup>                                                                                                                              | .560                                                                                                                            | .501                                                                                                                                                  | .599                                                                                                                                               | .626                                                                                                                                                                           | .571                                                                                                                                                            | .615                                                                                                                                                           | .613                                                                                                                                                            | .543                                                                                                                                                          | .505                                                                                                                                                      |
| .420                                                                                                                             | .513                                                                                                                                                        | .291                                                                                                                                              | .567                                                                                                                                               | .637                                                                                                                                                       | .566                                                                                                                                 | .570                                                                                                                              | .567                                                                                                                                                                      | .437                                                                                                                                                                    | .637                                                                                                                                                                               | .629 <sup>a</sup>                                                                                                                              | .560                                                                                                                            | .516                                                                                                                                                  | .572                                                                                                                                               | .633                                                                                                                                                                           | .565                                                                                                                                                            | .606                                                                                                                                                           | .585                                                                                                                                                            | .506                                                                                                                                                          | .477                                                                                                                                                      |
| .427                                                                                                                             | .461                                                                                                                                                        | .410                                                                                                                                              | .540                                                                                                                                               | .507                                                                                                                                                       | .601                                                                                                                                 | .533                                                                                                                              | .580                                                                                                                                                                      | .444                                                                                                                                                                    | .552                                                                                                                                                                               | .580                                                                                                                                           | .585 <sup>a</sup>                                                                                                               | .518                                                                                                                                                  | .406                                                                                                                                               | .611                                                                                                                                                                           | .565                                                                                                                                                            | .585                                                                                                                                                           | .500                                                                                                                                                            | .440                                                                                                                                                          | .429                                                                                                                                                      |

Reproduzierte Korrelationen

|                       | [ Ich kann mir konkrete Schreibziele setzen. ] Um Ihnen die Beantwortung zu erleichtern, können Sie die Antwort in Prozent geben | [ Ich kann meine Ideen auch bei einem komplexen Thema gut organisieren. ] Um Ihnen die Beantwortung zu erleichtern, können Sie die Antwort in Prozent geben | [ Ich kann mich dazu motivieren mit dem Schreiben anzufangen. ] Um Ihnen die Beantwortung zu erleichtern, können Sie die Antwort in Prozent geben | [ Ich kann Probleme, die beim Schreiben auftauchen, überwinden. ] Um Ihnen die Beantwortung zu erleichtern, können Sie die Antwort in Prozent geben | [ Ich kann Interesse für das Schreiben entwickeln. ] Um Ihnen die Beantwortung zu erleichtern, können Sie die Antwort in Prozent geben | [ Ich kann leicht Wege finden mein Interesse am Schreiben zu steigern. ] Um Ihnen die Beantwortung zu erleichtern, können Sie die Antwort in Prozent geben | [ Ich kann mich auf das Schreiben konzentrieren. ] Um Ihnen die Beantwortung zu erleichtern, können Sie die Antwort in Prozent geben | [ Ich kann meine Schreibzeit effektiv nutzen. ] Um Ihnen die Beantwortung zu erleichtern, können Sie die Antwort in Prozent geben | [ Ich kann mir meine Zeit so einteilen, dass ich konzentriert an meinem Text arbeite. ] Um Ihnen die Beantwortung zu erleichtern, können Sie die Antwort in Prozent geben | [ Ich kann mir meinen Schreibplatz so gestalten, dass ich ungestört schreiben kann. ] Um Ihnen die Beantwortung zu erleichtern, können Sie die Antwort in Prozent geben | [ Ich kann beim Schreiben erfolgreich sein. ] Um Ihnen die Beantwortung zu erleichtern, können Sie die Antwort in Prozent geben | [ Ich kann mein Vorankommen beim Schreiben nachvollziehen. ] Um Ihnen die Beantwortung zu erleichtern, können Sie die Antwort in Prozent geben | [ Ich kann mein Text ausdauernd anarbeiten. ] Um Ihnen die Beantwortung zu erleichtern, können Sie die Antwort in Prozent geben | [ Ich kann eine Schreibblockade lösen und danach weiterschreiben. ] Um Ihnen die Beantwortung zu erleichtern, können Sie die Antwort in Prozent geben | [ Ich kann ein gutes Gefühl beim Schreiben entwickeln. ] Um Ihnen die Beantwortung zu erleichtern, können Sie die Antwort in Prozent geben | [ Ich kann die gesetzten Teilziele beim Schreiben erreichen. ] Um Ihnen die Beantwortung zu erleichtern, können Sie die Antwort in Prozent geben | [ Ich kann die Kriterien für die Qualität meiner Texte erreichen. ] Um Ihnen die Beantwortung zu erleichtern, können Sie die Antwort in Prozent geben | [ Ich kann von mir selbst gesetzten Kriterien für die Qualität meiner Texte erreichen. ] Um Ihnen die Beantwortung zu erleichtern, können Sie die Antwort in Prozent geben | [ Ich kann ein gutes Gefühl für das Vorankommen beim Schreiben entwickeln. ] Um Ihnen die Beantwortung zu erleichtern, können Sie die Antwort in Prozent geben | [ Ich kann vermeiden, dass ich einen Fehler beim nächsten Mal wieder mache. ] Um Ihnen die Beantwortung zu erleichtern, können Sie die Antwort in Prozent geben | [ Ich kann mein Vorgehen bei Schreibprojekten durch Erfahrung verbessern. ] Um Ihnen die Beantwortung zu erleichtern, können Sie die Antwort in Prozent geben | [ Ich kann einschätzen, was ich beim nächsten Mal anders machen muss. ] Um Ihnen die Beantwortung zu erleichtern, können Sie die Antwort in Prozent geben |
|-----------------------|----------------------------------------------------------------------------------------------------------------------------------|-------------------------------------------------------------------------------------------------------------------------------------------------------------|---------------------------------------------------------------------------------------------------------------------------------------------------|-----------------------------------------------------------------------------------------------------------------------------------------------------|----------------------------------------------------------------------------------------------------------------------------------------|------------------------------------------------------------------------------------------------------------------------------------------------------------|--------------------------------------------------------------------------------------------------------------------------------------|-----------------------------------------------------------------------------------------------------------------------------------|---------------------------------------------------------------------------------------------------------------------------------------------------------------------------|-------------------------------------------------------------------------------------------------------------------------------------------------------------------------|---------------------------------------------------------------------------------------------------------------------------------|------------------------------------------------------------------------------------------------------------------------------------------------|---------------------------------------------------------------------------------------------------------------------------------|-------------------------------------------------------------------------------------------------------------------------------------------------------|--------------------------------------------------------------------------------------------------------------------------------------------|--------------------------------------------------------------------------------------------------------------------------------------------------|-------------------------------------------------------------------------------------------------------------------------------------------------------|----------------------------------------------------------------------------------------------------------------------------------------------------------------------------|----------------------------------------------------------------------------------------------------------------------------------------------------------------|-----------------------------------------------------------------------------------------------------------------------------------------------------------------|---------------------------------------------------------------------------------------------------------------------------------------------------------------|-----------------------------------------------------------------------------------------------------------------------------------------------------------|
|                       | .356                                                                                                                             | .429                                                                                                                                                        | .310                                                                                                                                              | .527                                                                                                                                                | .446                                                                                                                                   | .405                                                                                                                                                       | .446                                                                                                                                 | .435                                                                                                                              | .430                                                                                                                                                                      | .346                                                                                                                                                                    | .501                                                                                                                            | .516                                                                                                                                           | .406                                                                                                                            | .490 <sup>a</sup>                                                                                                                                     | .506                                                                                                                                       | .481                                                                                                                                             | .568                                                                                                                                                  | .481                                                                                                                                                                       | .506                                                                                                                                                           | .425                                                                                                                                                            | .338                                                                                                                                                          | .341                                                                                                                                                      |
|                       | .324                                                                                                                             | .461                                                                                                                                                        | .090                                                                                                                                              | .464                                                                                                                                                | .308                                                                                                                                   | .215                                                                                                                                                       | .411                                                                                                                                 | .489                                                                                                                              | .465                                                                                                                                                                      | .343                                                                                                                                                                    | .589                                                                                                                            | .572                                                                                                                                           | .406                                                                                                                            | .393                                                                                                                                                  | .491                                                                                                                                       | .565                                                                                                                                             | .516                                                                                                                                                  | .444                                                                                                                                                                       | .565                                                                                                                                                           | .488                                                                                                                                                            | .441                                                                                                                                                          |                                                                                                                                                           |
|                       | .436                                                                                                                             | .522                                                                                                                                                        | .355                                                                                                                                              | .614                                                                                                                                                | .517                                                                                                                                   | .474                                                                                                                                                       | .537                                                                                                                                 | .556                                                                                                                              | .550                                                                                                                                                                      | .439                                                                                                                                                                    | .626                                                                                                                            | .633                                                                                                                                           | .611                                                                                                                            | .568                                                                                                                                                  | .622                                                                                                                                       | .552                                                                                                                                             | .614 <sup>a</sup>                                                                                                                                     | .587                                                                                                                                                                       | .622                                                                                                                                                           | .552                                                                                                                                                            | .449                                                                                                                                                          |                                                                                                                                                           |
|                       | .440                                                                                                                             | .459                                                                                                                                                        | .401                                                                                                                                              | .498                                                                                                                                                | .475                                                                                                                                   | .500                                                                                                                                                       | .497                                                                                                                                 | .577                                                                                                                              | .600                                                                                                                                                                      | .480                                                                                                                                                                    | .571                                                                                                                            | .565                                                                                                                                           | .565                                                                                                                            | .481                                                                                                                                                  | .612                                                                                                                                       | .549                                                                                                                                             | .587                                                                                                                                                  | .576 <sup>a</sup>                                                                                                                                                          | .612                                                                                                                                                           | .549                                                                                                                                                            | .513                                                                                                                                                          |                                                                                                                                                           |
|                       | .467                                                                                                                             | .491                                                                                                                                                        | .412                                                                                                                                              | .526                                                                                                                                                | .496                                                                                                                                   | .520                                                                                                                                                       | .528                                                                                                                                 | .620                                                                                                                              | .642                                                                                                                                                                      | .512                                                                                                                                                                    | .615                                                                                                                            | .606                                                                                                                                           | .595                                                                                                                            | .506                                                                                                                                                  | .651 <sup>a</sup>                                                                                                                          | .595                                                                                                                                             | .622                                                                                                                                                  | .612                                                                                                                                                                       | .651 <sup>a</sup>                                                                                                                                              | .595                                                                                                                                                            | .558                                                                                                                                                          |                                                                                                                                                           |
|                       | .417                                                                                                                             | .469                                                                                                                                                        | .282                                                                                                                                              | .459                                                                                                                                                | .398                                                                                                                                   | .396                                                                                                                                                       | .472                                                                                                                                 | .600                                                                                                                              | .603                                                                                                                                                                      | .470                                                                                                                                                                    | .613                                                                                                                            | .585                                                                                                                                           | .500                                                                                                                            | .425                                                                                                                                                  | .585                                                                                                                                       | .552                                                                                                                                             | .552                                                                                                                                                  | .549                                                                                                                                                                       | .612 <sup>a</sup>                                                                                                                                              | .581                                                                                                                                                            | .525                                                                                                                                                          |                                                                                                                                                           |
|                       | .369                                                                                                                             | .399                                                                                                                                                        | .299                                                                                                                                              | .350                                                                                                                                                | .344                                                                                                                                   | .392                                                                                                                                                       | .419                                                                                                                                 | .587                                                                                                                              | .611                                                                                                                                                                      | .477                                                                                                                                                                    | .543                                                                                                                            | .506                                                                                                                                           | .440                                                                                                                            | .338                                                                                                                                                  | .558                                                                                                                                       | .459                                                                                                                                             | .459                                                                                                                                                  | .513                                                                                                                                                                       | .581                                                                                                                                                           | .594 <sup>a</sup>                                                                                                                                               | .525                                                                                                                                                          |                                                                                                                                                           |
|                       | .373                                                                                                                             | .380                                                                                                                                                        | .292                                                                                                                                              | .354                                                                                                                                                | .343                                                                                                                                   | .379                                                                                                                                                       | .400                                                                                                                                 | .534                                                                                                                              | .564                                                                                                                                                                      | .435                                                                                                                                                                    | .505                                                                                                                            | .477                                                                                                                                           | .429                                                                                                                            | .341                                                                                                                                                  | .521                                                                                                                                       | .482                                                                                                                                             | .449                                                                                                                                                  | .482                                                                                                                                                                       | .521                                                                                                                                                           | .525                                                                                                                                                            | .470 <sup>a</sup>                                                                                                                                             |                                                                                                                                                           |
| Residuum <sup>b</sup> |                                                                                                                                  | .047                                                                                                                                                        | .040                                                                                                                                              | .001                                                                                                                                                | .002                                                                                                                                   | -.001                                                                                                                                                      | .078                                                                                                                                 | .095                                                                                                                              | .011                                                                                                                                                                      | -.079                                                                                                                                                                   | .000                                                                                                                            | .003                                                                                                                                           | -.085                                                                                                                           | -.003                                                                                                                                                 | .046                                                                                                                                       | .075                                                                                                                                             | -.070                                                                                                                                                 | .075                                                                                                                                                                       | .046                                                                                                                                                           | -.030                                                                                                                                                           | .005                                                                                                                                                          | -.093                                                                                                                                                     |
|                       | .047                                                                                                                             | -.046                                                                                                                                                       | -.046                                                                                                                                             | .017                                                                                                                                                | -.024                                                                                                                                  | .117                                                                                                                                                       | .002                                                                                                                                 | .019                                                                                                                              | .087                                                                                                                                                                      | -.004                                                                                                                                                                   | -.023                                                                                                                           | -.083                                                                                                                                          | -.035                                                                                                                           | -.020                                                                                                                                                 | -.035                                                                                                                                      | -.018                                                                                                                                            | .063                                                                                                                                                  | -.018                                                                                                                                                                      | -.035                                                                                                                                                          | -.038                                                                                                                                                           | -.024                                                                                                                                                         | -.076                                                                                                                                                     |
|                       | .040                                                                                                                             | -.046                                                                                                                                                       | -.049                                                                                                                                             | .045                                                                                                                                                | -.049                                                                                                                                  | .007                                                                                                                                                       | -.056                                                                                                                                | .034                                                                                                                              | .001                                                                                                                                                                      | -.039                                                                                                                                                                   | .026                                                                                                                            | -.027                                                                                                                                          | -.027                                                                                                                           | .029                                                                                                                                                  | .065                                                                                                                                       | .005                                                                                                                                             | -.003                                                                                                                                                 | .005                                                                                                                                                                       | .065                                                                                                                                                           | -.017                                                                                                                                                           | -.017                                                                                                                                                         | .015                                                                                                                                                      |
|                       | .001                                                                                                                             | .017                                                                                                                                                        | .045                                                                                                                                              | .002                                                                                                                                                | .022                                                                                                                                   | -.002                                                                                                                                                      | .002                                                                                                                                 | .005                                                                                                                              | -.054                                                                                                                                                                     | -.084                                                                                                                                                                   | -.022                                                                                                                           | .016                                                                                                                                           | -.009                                                                                                                           | .042                                                                                                                                                  | -.042                                                                                                                                      | -.005                                                                                                                                            | -.039                                                                                                                                                 | -.005                                                                                                                                                                      | -.042                                                                                                                                                          | .071                                                                                                                                                            | .059                                                                                                                                                          | .022                                                                                                                                                      |
|                       | .002                                                                                                                             | -.024                                                                                                                                                       | -.049                                                                                                                                             | .022                                                                                                                                                | .077                                                                                                                                   | .077                                                                                                                                                       | .003                                                                                                                                 | -.052                                                                                                                             | -.102                                                                                                                                                                     | .067                                                                                                                                                                    | -.030                                                                                                                           | .004                                                                                                                                           | .067                                                                                                                            | -.052                                                                                                                                                 | .014                                                                                                                                       | -.106                                                                                                                                            | .001                                                                                                                                                  | -.106                                                                                                                                                                      | .014                                                                                                                                                           | .081                                                                                                                                                            | .040                                                                                                                                                          | -.015                                                                                                                                                     |
|                       | -.001                                                                                                                            | .117                                                                                                                                                        | .007                                                                                                                                              | -.002                                                                                                                                               | .077                                                                                                                                   | -.002                                                                                                                                                      | -.009                                                                                                                                | -.043                                                                                                                             | .004                                                                                                                                                                      | .035                                                                                                                                                                    | -.024                                                                                                                           | -.063                                                                                                                                          | -.049                                                                                                                           | -.042                                                                                                                                                 | .012                                                                                                                                       | -.059                                                                                                                                            | .044                                                                                                                                                  | -.059                                                                                                                                                                      | .012                                                                                                                                                           | .022                                                                                                                                                            | .015                                                                                                                                                          | .007                                                                                                                                                      |





Reproduzierte Korrelationen

|                                                                                                                                  |                                                                                                                                                             |                                                                                                                                                   |                                                                                                                                                     |                                                                                                                                                            |                                                                                                                                      |                                                                                                                                   |                                                                                                                                                                       |                                                                                                                                                                     |                                                                                                                                                                                    |                                                                                                                                                |                                                                                                                                                     |                                                                                                                                                    |                                                                                                                                                                                |                                                                                                                                                                 |                                                                                                                                                                |                                                                                                                                                                 |                                                                                                                                                               |                                                                                                                                                           |
|----------------------------------------------------------------------------------------------------------------------------------|-------------------------------------------------------------------------------------------------------------------------------------------------------------|---------------------------------------------------------------------------------------------------------------------------------------------------|-----------------------------------------------------------------------------------------------------------------------------------------------------|------------------------------------------------------------------------------------------------------------------------------------------------------------|--------------------------------------------------------------------------------------------------------------------------------------|-----------------------------------------------------------------------------------------------------------------------------------|-----------------------------------------------------------------------------------------------------------------------------------------------------------------------|---------------------------------------------------------------------------------------------------------------------------------------------------------------------|------------------------------------------------------------------------------------------------------------------------------------------------------------------------------------|------------------------------------------------------------------------------------------------------------------------------------------------|-----------------------------------------------------------------------------------------------------------------------------------------------------|----------------------------------------------------------------------------------------------------------------------------------------------------|--------------------------------------------------------------------------------------------------------------------------------------------------------------------------------|-----------------------------------------------------------------------------------------------------------------------------------------------------------------|----------------------------------------------------------------------------------------------------------------------------------------------------------------|-----------------------------------------------------------------------------------------------------------------------------------------------------------------|---------------------------------------------------------------------------------------------------------------------------------------------------------------|-----------------------------------------------------------------------------------------------------------------------------------------------------------|
| [ Ich kann mir konkrete Schreibziele setzen. ] Um Ihnen die Beantwortung zu erleichtern, können Sie die Antwort in Prozent geben | [ Ich kann meine Ideen auch bei einem komplexen Thema gut organisieren. ] Um Ihnen die Beantwortung zu erleichtern, können Sie die Antwort in Prozent geben | [ Ich kann mich dazu motivieren mit dem Schreiben anzufangen. ] Um Ihnen die Beantwortung zu erleichtern, können Sie die Antwort in Prozent geben | [ Ich kann Probleme, die beim Schreiben auftauchen, überwinden. ] Um Ihnen die Beantwortung zu erleichtern, können Sie die Antwort in Prozent geben | [ Ich kann leicht Wege finden mein Interesse am Schreiben zu steigern. ] Um Ihnen die Beantwortung zu erleichtern, können Sie die Antwort in Prozent geben | [ Ich kann mich auf das Schreiben konzentrieren. ] Um Ihnen die Beantwortung zu erleichtern, können Sie die Antwort in Prozent geben | [ Ich kann meine Schreibzeit effektiv nutzen. ] Um Ihnen die Beantwortung zu erleichtern, können Sie die Antwort in Prozent geben | [ Ich kann meine Zeit so einteilen, dass ich konzentriert an meinem Text arbeite. ] Um Ihnen die Beantwortung zu erleichtern, können Sie die Antwort in Prozent geben | [ Ich kann meinen Schreibplatz so gestalten, dass ich ungestört schreiben kann. ] Um Ihnen die Beantwortung zu erleichtern, können Sie die Antwort in Prozent geben | [ Ich kann mein Vorgehen beim Schreiben ändern, wenn ich merke, dass es nicht erfolgreich ist. ] Um Ihnen die Beantwortung zu erleichtern, können Sie die Antwort in Prozent geben | [ Ich kann mein Vorankommen beim Schreiben nachvollziehen. ] Um Ihnen die Beantwortung zu erleichtern, können Sie die Antwort in Prozent geben | [ Ich kann eine Schreibblockade lösen und dann weiterschreiben. ] Um Ihnen die Beantwortung zu erleichtern, können Sie die Antwort in Prozent geben | [ Ich kann die Qualität meines Textes realistisch einschätzen. ] Um Ihnen die Beantwortung zu erleichtern, können Sie die Antwort in Prozent geben | [ Ich kann die von mir selbst gesetzten Kriterien für die Qualität meiner Texte erreichen. ] Um Ihnen die Beantwortung zu erleichtern, können Sie die Antwort in Prozent geben | [ Ich kann die von mir selbst gesetzten Teilziele beim Schreiben erreichen. ] Um Ihnen die Beantwortung zu erleichtern, können Sie die Antwort in Prozent geben | [ Ich kann ein gutes Gefühl für das Vorankommen beim Schreiben entwickeln. ] Um Ihnen die Beantwortung zu erleichtern, können Sie die Antwort in Prozent geben | [ Ich kann vermeiden, dass ich einen Fehler beim nächsten Mal wieder mache. ] Um Ihnen die Beantwortung zu erleichtern, können Sie die Antwort in Prozent geben | [ Ich kann mein Vorgehen bei Schreibprojekten durch Erfahrung verbessern. ] Um Ihnen die Beantwortung zu erleichtern, können Sie die Antwort in Prozent geben | [ Ich kann einschätzen, was ich beim nächsten Mal anders machen muss. ] Um Ihnen die Beantwortung zu erleichtern, können Sie die Antwort in Prozent geben |
| ,005                                                                                                                             | -,024                                                                                                                                                       | -,017                                                                                                                                             | ,040                                                                                                                                                | ,015                                                                                                                                                       | -,021                                                                                                                                | -,025                                                                                                                             | -,022                                                                                                                                                                 | ,010                                                                                                                                                                | -,014                                                                                                                                                                              | -,019                                                                                                                                          | ,001                                                                                                                                                | -,035                                                                                                                                              | ,004                                                                                                                                                                           | -,004                                                                                                                                                           | -,010                                                                                                                                                          | ,076                                                                                                                                                            |                                                                                                                                                               | ,048                                                                                                                                                      |
| -,083                                                                                                                            | -,076                                                                                                                                                       | ,015                                                                                                                                              | -,015                                                                                                                                               | ,007                                                                                                                                                       | ,089                                                                                                                                 | -,049                                                                                                                             | -,014                                                                                                                                                                 | -,019                                                                                                                                                               | ,035                                                                                                                                                                               | -,024                                                                                                                                          | -,005                                                                                                                                               | -,015                                                                                                                                              | ,016                                                                                                                                                                           | -,002                                                                                                                                                           | -,049                                                                                                                                                          | ,063                                                                                                                                                            |                                                                                                                                                               | ,048                                                                                                                                                      |

Extraktionsmethode: Hauptachsen-Faktorenanalyse.

a. Reproduzierte Kommunalitäten

b. Residuen werden zwischen beobachteten und reproduzierten Korrelationen berechnet. Es liegen 62 (22,0%) nicht redundante Residuen mit absoluten Werten größer 0,05 vor.

Mustermatrix<sup>a</sup>

|                                                                                                                                                             | Faktor |       |       |
|-------------------------------------------------------------------------------------------------------------------------------------------------------------|--------|-------|-------|
|                                                                                                                                                             | 1      | 2     | 3     |
| [ Ich kann mir konkrete Schreibziele setzen. ] Um Ihnen die Beantwortung zu erleichtern, können Sie die Antwort in Prozent geben                            | ,253   | ,136  | ,267  |
| [ Ich kann meine Ideen auch bei einem komplexen Thema gut organisieren. ] Um Ihnen die Beantwortung zu erleichtern, können Sie die Antwort in Prozent geben | ,203   | ,496  | -,025 |
| [ Ich kann mich dazu motivieren mit dem Schreiben anzufangen. ] Um Ihnen die Beantwortung zu erleichtern, können Sie die Antwort in Prozent geben           | -,059  | -,038 | ,720  |
| [ Ich kann Probleme, die beim Schreiben auftauchen, überwinden. ] Um Ihnen die Beantwortung zu erleichtern, können Sie die Antwort in Prozent geben         | -,139  | ,843  | ,033  |

**Mustermatrix<sup>a</sup>**

|                                                                                                                                                                                    | Faktor |       |       |
|------------------------------------------------------------------------------------------------------------------------------------------------------------------------------------|--------|-------|-------|
|                                                                                                                                                                                    | 1      | 2     | 3     |
| [ Ich kann Interesse für das Schreiben entwickeln. ] Um Ihnen die Beantwortung zu erleichtern, können Sie die Antwort in Prozent geben                                             | -,094  | ,448  | ,363  |
| [ Ich kann leicht Wege finden mein Interesse am Schreiben zu steigern. ] Um Ihnen die Beantwortung zu erleichtern, können Sie die Antwort in Prozent geben                         | ,019   | ,091  | ,655  |
| [ Ich kann mein Vorgehen beim Schreiben überwachen. ] Um Ihnen die Beantwortung zu erleichtern, können Sie die Antwort in Prozent geben                                            | ,154   | ,402  | ,184  |
| [ Ich kann mich auf das Schreiben konzentrieren. ] Um Ihnen die Beantwortung zu erleichtern, können Sie die Antwort in Prozent geben                                               | ,253   | ,193  | ,470  |
| [ Ich kann meine Schreibzeit effektiv nutzen. ] Um Ihnen die Beantwortung zu erleichtern, können Sie die Antwort in Prozent geben                                                  | ,609   | ,053  | ,189  |
| [ Ich kann mir meine Zeit so einteilen, dass ich konzentriert an meinem Text arbeite. ] Um Ihnen die Beantwortung zu erleichtern, können Sie die Antwort in Prozent geben          | ,630   | -,090 | ,352  |
| [ Ich kann mir meinen Schreibplatz so gestalten, dass ich ungestört schreiben kann. ] Um Ihnen die Beantwortung zu erleichtern, können Sie die Antwort in Prozent geben            | ,456   | -,069 | ,329  |
| [ Ich kann mein Vorgehen beim Schreiben ändern, wenn ich merke, dass es nicht erfolgreich ist. ] Um Ihnen die Beantwortung zu erleichtern, können Sie die Antwort in Prozent geben | ,451   | ,461  | -,079 |

Mustermatrix<sup>a</sup>

|                                                                                                                                                                                | Faktor |      |       |
|--------------------------------------------------------------------------------------------------------------------------------------------------------------------------------|--------|------|-------|
|                                                                                                                                                                                | 1      | 2    | 3     |
| [ Ich kann mein Vorankommen beim Schreiben nachvollziehen. ]<br>Um Ihnen die Beantwortung zu erleichtern, können Sie die Antwort in Prozent geben                              | ,312   | ,553 | -,037 |
| [ Ich kann ausdauernd an meinem Text arbeiten. ] Um Ihnen die Beantwortung zu erleichtern, können Sie die Antwort in Prozent geben                                             | ,016   | ,488 | ,344  |
| [ Ich kann eine Schreibblockade lösen und danach weiterschreiben. ] Um Ihnen die Beantwortung zu erleichtern, können Sie die Antwort in Prozent geben                          | -,137  | ,688 | ,167  |
| [ Ich kann die Qualität meines Textes realistisch einschätzen. ] Um Ihnen die Beantwortung zu erleichtern, können Sie die Antwort in Prozent geben                             | ,643   | ,456 | -,472 |
| [ Ich kann die von mir selbst gesetzten Kriterien für die Qualität meiner Texte erreichen. ] Um Ihnen die Beantwortung zu erleichtern, können Sie die Antwort in Prozent geben | ,036   | ,705 | ,130  |
| [ Ich kann die von mir selbst gesetzten Teilziele beim Schreiben erreichen. ] Um Ihnen die Beantwortung zu erleichtern, können Sie die Antwort in Prozent geben                | ,294   | ,266 | ,298  |
| [ Ich kann ein gutes Gefühl für das Vorankommen beim Schreiben entwickeln. ] Um Ihnen die Beantwortung zu erleichtern, können Sie die Antwort in Prozent geben                 | ,369   | ,266 | ,274  |
| [ Ich kann vermeiden, dass ich einen Fehler beim nächsten Mal wieder mache. ] Um Ihnen die Beantwortung zu erleichtern, können Sie die Antwort in Prozent geben                | ,683   | ,150 | -,034 |

### Mustermatrix<sup>a</sup>

|                                                                                                                                                               | Faktor |       |      |
|---------------------------------------------------------------------------------------------------------------------------------------------------------------|--------|-------|------|
|                                                                                                                                                               | 1      | 2     | 3    |
| [ Ich kann mein Vorgehen bei Schreibprojekten durch Erfahrung verbessern. ] Um Ihnen die Beantwortung zu erleichtern, können Sie die Antwort in Prozent geben | ,852   | -,185 | ,082 |
| [ Ich kann einschätzen, was ich beim nächsten Mal anders machen muss. ] Um Ihnen die Beantwortung zu erleichtern, können Sie die Antwort in Prozent geben     | ,658   | -,062 | ,111 |

Extraktionsmethode: Hauptachsenfaktorenanalyse.

Rotationsmethode: Promax mit Kaiser-Normalisierung.<sup>a</sup>

a. Die Rotation ist in 6 Iterationen konvergiert.

### Strukturmatrix

|                                                                                                                                                             | Faktor |      |      |
|-------------------------------------------------------------------------------------------------------------------------------------------------------------|--------|------|------|
|                                                                                                                                                             | 1      | 2    | 3    |
| [ Ich kann mir konkrete Schreibziele setzen. ] Um Ihnen die Beantwortung zu erleichtern, können Sie die Antwort in Prozent geben                            | ,527   | ,497 | ,512 |
| [ Ich kann meine Ideen auch bei einem komplexen Thema gut organisieren. ] Um Ihnen die Beantwortung zu erleichtern, können Sie die Antwort in Prozent geben | ,567   | ,636 | ,411 |
| [ Ich kann mich dazu motivieren mit dem Schreiben anzufangen. ] Um Ihnen die Beantwortung zu erleichtern, können Sie die Antwort in Prozent geben           | ,366   | ,364 | ,659 |
| [ Ich kann Probleme, die beim Schreiben auftauchen, überwinden. ] Um Ihnen die Beantwortung zu erleichtern, können Sie die Antwort in Prozent geben         | ,530   | ,758 | ,470 |

Strukturmatrix

|                                                                                                                                                                                    | Faktor |      |      |
|------------------------------------------------------------------------------------------------------------------------------------------------------------------------------------|--------|------|------|
|                                                                                                                                                                                    | 1      | 2    | 3    |
| [ Ich kann Interesse für das Schreiben entwickeln. ] Um Ihnen die Beantwortung zu erleichtern, können Sie die Antwort in Prozent geben                                             | ,479   | ,602 | ,582 |
| [ Ich kann leicht Wege finden mein Interesse am Schreiben zu steigern. ] Um Ihnen die Beantwortung zu erleichtern, können Sie die Antwort in Prozent geben                         | ,502   | ,513 | ,723 |
| [ Ich kann mein Vorgehen beim Schreiben überwachen. ] Um Ihnen die Beantwortung zu erleichtern, können Sie die Antwort in Prozent geben                                            | ,579   | ,634 | ,531 |
| [ Ich kann mich auf das Schreiben konzentrieren. ] Um Ihnen die Beantwortung zu erleichtern, können Sie die Antwort in Prozent geben                                               | ,698   | ,680 | ,750 |
| [ Ich kann meine Schreibzeit effektiv nutzen. ] Um Ihnen die Beantwortung zu erleichtern, können Sie die Antwort in Prozent geben                                                  | ,769   | ,638 | ,607 |
| [ Ich kann mir meine Zeit so einteilen, dass ich konzentriert an meinem Text arbeite. ] Um Ihnen die Beantwortung zu erleichtern, können Sie die Antwort in Prozent geben          | ,783   | ,612 | ,694 |
| [ Ich kann mir meinen Schreibplatz so gestalten, dass ich ungestört schreiben kann. ] Um Ihnen die Beantwortung zu erleichtern, können Sie die Antwort in Prozent geben            | ,611   | ,485 | ,574 |
| [ Ich kann mein Vorgehen beim Schreiben ändern, wenn ich merke, dass es nicht erfolgreich ist. ] Um Ihnen die Beantwortung zu erleichtern, können Sie die Antwort in Prozent geben | ,755   | ,758 | ,492 |

Strukturmatrix

|                                                                                                                                                                                | Faktor |      |      |
|--------------------------------------------------------------------------------------------------------------------------------------------------------------------------------|--------|------|------|
|                                                                                                                                                                                | 1      | 2    | 3    |
| [ Ich kann mein Vorankommen beim Schreiben nachvollziehen. ]<br>Um Ihnen die Beantwortung zu erleichtern, können Sie die Antwort in Prozent geben                              | ,713   | ,769 | ,504 |
| [ Ich kann ausdauernd an meinem Text arbeiten. ] Um Ihnen die Beantwortung zu erleichtern, können Sie die Antwort in Prozent geben                                             | ,608   | ,715 | ,658 |
| [ Ich kann eine Schreibblockade lösen und danach weiterschreiben. ] Um Ihnen die Beantwortung zu erleichtern, können Sie die Antwort in Prozent geben                          | ,497   | ,687 | ,509 |
| [ Ich kann die Qualität meines Textes realistisch einschätzen. ] Um Ihnen die Beantwortung zu erleichtern, können Sie die Antwort in Prozent geben                             | ,695   | ,656 | ,218 |
| [ Ich kann die von mir selbst gesetzten Kriterien für die Qualität meiner Texte erreichen. ] Um Ihnen die Beantwortung zu erleichtern, können Sie die Antwort in Prozent geben | ,659   | ,813 | ,591 |
| [ Ich kann die von mir selbst gesetzten Teilziele beim Schreiben erreichen. ] Um Ihnen die Beantwortung zu erleichtern, können Sie die Antwort in Prozent geben                | ,687   | ,677 | ,649 |
| [ Ich kann ein gutes Gefühl für das Vorankommen beim Schreiben entwickeln. ] Um Ihnen die Beantwortung zu erleichtern, können Sie die Antwort in Prozent geben                 | ,746   | ,720 | ,672 |
| [ Ich kann vermeiden, dass ich einen Fehler beim nächsten Mal wieder mache. ] Um Ihnen die Beantwortung zu erleichtern, können Sie die Antwort in Prozent geben                | ,777   | ,653 | ,491 |

### Strukturmatrix

|                                                                                                                                                               | Faktor |      |      |
|---------------------------------------------------------------------------------------------------------------------------------------------------------------|--------|------|------|
|                                                                                                                                                               | 1      | 2    | 3    |
| [ Ich kann mein Vorgehen bei Schreibprojekten durch Erfahrung verbessern. ] Um Ihnen die Beantwortung zu erleichtern, können Sie die Antwort in Prozent geben | ,762   | ,520 | ,505 |
| [ Ich kann einschätzen, was ich beim nächsten Mal anders machen muss. ] Um Ihnen die Beantwortung zu erleichtern, können Sie die Antwort in Prozent geben     | ,681   | ,512 | ,488 |

Extraktionsmethode: Hauptachsenfaktorenanalyse.

Rotationsmethode: Promax mit Kaiser-Normalisierung.

### Korrelationsmatrix für Faktor

| Faktor | 1     | 2     | 3     |
|--------|-------|-------|-------|
| 1      | 1,000 | ,768  | ,632  |
| 2      | ,768  | 1,000 | ,622  |
| 3      | ,632  | ,622  | 1,000 |

Extraktionsmethode:

Hauptachsenfaktorenanalyse.

Rotationsmethode: Promax mit Kaiser-

Normalisierung.

\* Parallel Analysis program.

set mxloops=9000 printback=off width=80 seed = 1953125.

### Matrix

Run MATRIX procedure:

PARALLEL ANALYSIS:

Principal Axis / Common Factor Analysis

Specifications for this Run:

Ncases 121

Nvars 22

Ndatasets 100

Percent 95

Random Data Eigenvalues

|     | Root      | Means    | Prcntyle |
|-----|-----------|----------|----------|
| 1.  | 1.000000  | 1.047964 | 1.180982 |
| 2.  | 2.000000  | .889661  | 1.000941 |
| 3.  | 3.000000  | .768907  | .866797  |
| 4.  | 4.000000  | .664840  | .749624  |
| 5.  | 5.000000  | .570799  | .674740  |
| 6.  | 6.000000  | .490970  | .564846  |
| 7.  | 7.000000  | .412559  | .480707  |
| 8.  | 8.000000  | .333459  | .391986  |
| 9.  | 9.000000  | .269825  | .339496  |
| 10. | 10.000000 | .198291  | .252353  |
| 11. | 11.000000 | .135264  | .192272  |
| 12. | 12.000000 | .078082  | .132678  |
| 13. | 13.000000 | .019782  | .058279  |
| 14. | 14.000000 | -.036117 | .009456  |
| 15. | 15.000000 | -.082260 | -.031952 |
| 16. | 16.000000 | -.133819 | -.094101 |
| 17. | 17.000000 | -.182817 | -.148012 |
| 18. | 18.000000 | -.230681 | -.196303 |
| 19. | 19.000000 | -.276908 | -.251779 |
| 20. | 20.000000 | -.318779 | -.283372 |
| 21. | 21.000000 | -.366331 | -.331692 |
| 22. | 22.000000 | -.418204 | -.383245 |

Compare the random data eigenvalues to the

real-data eigenvalues that are obtained from a

Common Factor Analysis in which the # of factors

extracted equals the # of variables/items, and the

number of iterations is fixed at zero;

To obtain these real-data values using SPSS, see the

sample commands at the end of the parallel.sps program,

or use the rawpar.sps program.

Warning: Parallel analyses of adjusted correlation matrices



eg, with SMCs on the diagonal, tend to indicate more factors than warranted (Buja, A., & Eyuboglu, N., 1992, Remarks on parallel analysis. Multivariate Behavioral Research, 27, 509-540.).

The eigenvalues for trivial, negligible factors in the real data commonly surpass corresponding random data eigenvalues for the same roots. The eigenvalues from parallel analyses can be used to determine the real data eigenvalues that are beyond chance, but additional procedures should then be used to trim trivial factors.

Principal components eigenvalues are often used to determine the number of common factors. This is the default in most statistical software packages, and it is the primary practice in the literature. It is also the method used by many factor analysis experts, including Cattell, who often examined principal components eigenvalues in his scree plots to determine the number of common factors. But others believe this common practice is wrong. Principal components eigenvalues are based on all of the variance in correlation matrices, including both the variance that is shared among variables and the variances that are unique to the variables. In contrast, principal axis eigenvalues are based solely on the shared variance among the variables. The two procedures are qualitatively

diferent. Some therefore claim that the eigenvalues from one

extraction method should not be used to determine

the number of factors for the other extraction method.

The issue remains neglected and unsettled.

----- END MATRIX -----

## Korrelationen

|                          | [ Ich kann mir konkrete Schreibziele setzen. ] Um Ihnen die Antwort zu erleichtern, können Sie die Antwort in Prozent geben | [ Ich kann meine Ideen auch bei einem komplexen Thema gut organisieren. ] Um Ihnen die Antwort zu erleichtern, können Sie die Antwort in Prozent geben | [ Ich kann mich dazu motivieren mit dem Schreiben anzufangen. ] Um Ihnen die Antwort zu erleichtern, können Sie die Antwort in Prozent geben | [ Ich kann Probleme, die beim Schreiben auftauchen, überwinden. ] Um Ihnen die Antwort zu erleichtern, können Sie die Antwort in Prozent geben | [ Ich kann Interesse am Schreiben entwickeln. ] Um Ihnen die Antwort zu erleichtern, können Sie die Antwort in Prozent geben | [ Ich kann leicht Wege finden mein Interesse am Schreiben zu steigern. ] Um Ihnen die Antwort zu erleichtern, können Sie die Antwort in Prozent geben | [ Ich kann meine Vorgehensweise beim Schreiben überarbeiten. ] Um Ihnen die Antwort zu erleichtern, können Sie die Antwort in Prozent geben | [ Ich kann mich auf das Schreiben konzentrieren. ] Um Ihnen die Antwort zu erleichtern, können Sie die Antwort in Prozent geben | [ Ich kann meine Schreibzeit effektiv nutzen. ] Um Ihnen die Antwort zu erleichtern, können Sie die Antwort in Prozent geben | [ Ich kann meine Zeit so einteilen, dass ich konzentriert an meiner Text arbeite. ] Um Ihnen die Antwort zu erleichtern, können Sie die Antwort in Prozent geben | [ Ich kann mir meinen Schreibplatz so gestalten, dass ich ungestört schreiben kann. ] Um Ihnen die Antwort zu erleichtern, können Sie die Antwort in Prozent geben | [ Ich kann mein Vorgehen beim Schreiben ändern, wenn ich merke, dass es nicht erfolgreich ist. ] Um Ihnen die Antwort zu erleichtern, können Sie die Antwort in Prozent geben | [ Ich kann beim Schreiben nachvollziehen. ] Um Ihnen die Antwort zu erleichtern, können Sie die Antwort in Prozent geben | [ Ich kann mein Vorgehen beim Schreiben ausdauernd anwenden. ] Um Ihnen die Antwort zu erleichtern, können Sie die Antwort in Prozent geben | [ Ich kann eine Schreibblockade lösen und weiter schreiben. ] Um Ihnen die Antwort zu erleichtern, können Sie die Antwort in Prozent geben | [ Ich kann die Qualität meines Textes realistisch einschätzen. ] Um Ihnen die Antwort zu erleichtern, können Sie die Antwort in Prozent geben | [ Ich kann die von mir selbst gesetzten Kriterien für die Qualität meiner Texte erreichen. ] Um Ihnen die Antwort zu erleichtern, können Sie die Antwort in Prozent geben | [ Ich kann die von mir selbst gesetzten Teilziele beim Schreiben erreichen. ] Um Ihnen die Antwort zu erleichtern, können Sie die Antwort in Prozent geben | [ Ich kann ein gutes Gefühl beim Schreiben entwickeln. ] Um Ihnen die Antwort zu erleichtern, können Sie die Antwort in Prozent geben | [ Ich kann vermeiden, dass ich beim nächsten Mal Fehler beim Schreiben mache. ] Um Ihnen die Antwort zu erleichtern, können Sie die Antwort in Prozent geben | [ Ich kann mein Vorgehen bei Schreibprojekten durch Erfahrung verbessern. ] Um Ihnen die Antwort zu erleichtern, können Sie die Antwort in Prozent geben | [ Ich kann einschätzen, was ich beim nächsten Mal anders machen muss. ] Um Ihnen die Antwort zu erleichtern, können Sie die Antwort in Prozent geben |      |
|--------------------------|-----------------------------------------------------------------------------------------------------------------------------|--------------------------------------------------------------------------------------------------------------------------------------------------------|----------------------------------------------------------------------------------------------------------------------------------------------|------------------------------------------------------------------------------------------------------------------------------------------------|------------------------------------------------------------------------------------------------------------------------------|-------------------------------------------------------------------------------------------------------------------------------------------------------|---------------------------------------------------------------------------------------------------------------------------------------------|---------------------------------------------------------------------------------------------------------------------------------|------------------------------------------------------------------------------------------------------------------------------|------------------------------------------------------------------------------------------------------------------------------------------------------------------|--------------------------------------------------------------------------------------------------------------------------------------------------------------------|-------------------------------------------------------------------------------------------------------------------------------------------------------------------------------|--------------------------------------------------------------------------------------------------------------------------|---------------------------------------------------------------------------------------------------------------------------------------------|--------------------------------------------------------------------------------------------------------------------------------------------|-----------------------------------------------------------------------------------------------------------------------------------------------|---------------------------------------------------------------------------------------------------------------------------------------------------------------------------|------------------------------------------------------------------------------------------------------------------------------------------------------------|---------------------------------------------------------------------------------------------------------------------------------------|--------------------------------------------------------------------------------------------------------------------------------------------------------------|----------------------------------------------------------------------------------------------------------------------------------------------------------|------------------------------------------------------------------------------------------------------------------------------------------------------|------|
| Korrelation nach Pearson | 1                                                                                                                           | ,387                                                                                                                                                   | ,389                                                                                                                                         | ,364                                                                                                                                           | ,361                                                                                                                         | ,380                                                                                                                                                  | ,454                                                                                                                                        | ,422                                                                                                                            | ,539                                                                                                                         | ,479                                                                                                                                                             | ,295                                                                                                                                                               | ,427                                                                                                                                                                          | ,423                                                                                                                     | ,342                                                                                                                                        | ,353                                                                                                                                       | ,330                                                                                                                                          | ,366                                                                                                                                                                      | ,515                                                                                                                                                       | ,513                                                                                                                                  | ,387                                                                                                                                                         | ,404                                                                                                                                                     | ,280                                                                                                                                                 |      |
| Korrelation nach Pearson | ,387                                                                                                                        | 1                                                                                                                                                      | ,192                                                                                                                                         | ,488                                                                                                                                           | ,357                                                                                                                         | ,455                                                                                                                                                  | ,420                                                                                                                                        | ,440                                                                                                                            | ,476                                                                                                                         | ,541                                                                                                                                                             | ,346                                                                                                                                                               | ,494                                                                                                                                                                          | ,421                                                                                                                     | ,426                                                                                                                                        | ,409                                                                                                                                       | ,564                                                                                                                                          | ,584                                                                                                                                                                      | ,440                                                                                                                                                       | ,456                                                                                                                                  | ,431                                                                                                                                                         | ,376                                                                                                                                                     | ,304                                                                                                                                                 |      |
| Korrelation nach Pearson | ,359                                                                                                                        | ,000                                                                                                                                                   | 1                                                                                                                                            | ,323                                                                                                                                           | ,319                                                                                                                         | ,478                                                                                                                                                  | ,268                                                                                                                                        | ,482                                                                                                                            | ,401                                                                                                                         | ,431                                                                                                                                                             | ,319                                                                                                                                                               | ,306                                                                                                                                                                          | ,264                                                                                                                     | ,363                                                                                                                                        | ,340                                                                                                                                       | ,089                                                                                                                                          | ,353                                                                                                                                                                      | ,406                                                                                                                                                       | ,467                                                                                                                                  | ,265                                                                                                                                                         | ,281                                                                                                                                                     | ,307                                                                                                                                                 |      |
| Korrelation nach Pearson | ,364                                                                                                                        | ,488                                                                                                                                                   | ,323                                                                                                                                         | 1                                                                                                                                              | ,482                                                                                                                         | ,385                                                                                                                                                  | ,474                                                                                                                                        | ,508                                                                                                                            | ,457                                                                                                                         | ,377                                                                                                                                                             | ,260                                                                                                                                                               | ,529                                                                                                                                                                          | ,582                                                                                                                     | ,532                                                                                                                                        | ,569                                                                                                                                       | ,441                                                                                                                                          | ,575                                                                                                                                                                      | ,493                                                                                                                                                       | ,484                                                                                                                                  | ,531                                                                                                                                                         | ,408                                                                                                                                                     | ,376                                                                                                                                                 |      |
| Korrelation nach Pearson | ,361                                                                                                                        | ,357                                                                                                                                                   | ,319                                                                                                                                         | ,482                                                                                                                                           | 1                                                                                                                            | ,522                                                                                                                                                  | ,425                                                                                                                                        | ,561                                                                                                                            | ,362                                                                                                                         | ,350                                                                                                                                                             | ,436                                                                                                                                                               | ,417                                                                                                                                                                          | ,465                                                                                                                     | ,568                                                                                                                                        | ,383                                                                                                                                       | ,317                                                                                                                                          | ,518                                                                                                                                                                      | ,369                                                                                                                                                       | ,510                                                                                                                                  | ,479                                                                                                                                                         | ,384                                                                                                                                                     | ,328                                                                                                                                                 |      |
| Korrelation nach Pearson | ,390                                                                                                                        | ,455                                                                                                                                                   | ,478                                                                                                                                         | ,385                                                                                                                                           | ,522                                                                                                                         | 1                                                                                                                                                     | ,408                                                                                                                                        | ,556                                                                                                                            | ,427                                                                                                                         | ,529                                                                                                                                                             | ,466                                                                                                                                                               | ,382                                                                                                                                                                          | ,350                                                                                                                     | ,459                                                                                                                                        | ,363                                                                                                                                       | ,216                                                                                                                                          | ,517                                                                                                                                                                      | ,440                                                                                                                                                       | ,531                                                                                                                                  | ,418                                                                                                                                                         | ,407                                                                                                                                                     | ,386                                                                                                                                                 |      |
| Korrelation nach Pearson | ,454                                                                                                                        | ,420                                                                                                                                                   | ,268                                                                                                                                         | ,474                                                                                                                                           | ,425                                                                                                                         | ,408                                                                                                                                                  | 1                                                                                                                                           | ,508                                                                                                                            | ,453                                                                                                                         | ,443                                                                                                                                                             | ,396                                                                                                                                                               | ,517                                                                                                                                                                          | ,516                                                                                                                     | ,495                                                                                                                                        | ,433                                                                                                                                       | ,353                                                                                                                                          | ,535                                                                                                                                                                      | ,504                                                                                                                                                       | ,605                                                                                                                                  | ,461                                                                                                                                                         | ,398                                                                                                                                                     | ,489                                                                                                                                                 |      |
| Korrelation nach Pearson | ,422                                                                                                                        | ,440                                                                                                                                                   | ,482                                                                                                                                         | ,508                                                                                                                                           | ,561                                                                                                                         | ,556                                                                                                                                                  | ,508                                                                                                                                        | 1                                                                                                                               | ,604                                                                                                                         | ,653                                                                                                                                                             | ,528                                                                                                                                                               | ,512                                                                                                                                                                          | ,582                                                                                                                     | ,627                                                                                                                                        | ,438                                                                                                                                       | ,436                                                                                                                                          | ,674                                                                                                                                                                      | ,615                                                                                                                                                       | ,589                                                                                                                                  | ,562                                                                                                                                                         | ,524                                                                                                                                                     | ,540                                                                                                                                                 |      |
| Korrelation nach Pearson | ,539                                                                                                                        | ,476                                                                                                                                                   | ,401                                                                                                                                         | ,457                                                                                                                                           | ,382                                                                                                                         | ,427                                                                                                                                                  | ,453                                                                                                                                        | ,604                                                                                                                            | 1                                                                                                                            | ,704                                                                                                                                                             | ,496                                                                                                                                                               | ,611                                                                                                                                                                          | ,521                                                                                                                     | ,564                                                                                                                                        | ,446                                                                                                                                       | ,539                                                                                                                                          | ,554                                                                                                                                                                      | ,567                                                                                                                                                       | ,596                                                                                                                                  | ,573                                                                                                                                                         | ,562                                                                                                                                                     | ,485                                                                                                                                                 |      |
| Korrelation nach Pearson | ,479                                                                                                                        | ,541                                                                                                                                                   | ,431                                                                                                                                         | ,377                                                                                                                                           | ,350                                                                                                                         | ,529                                                                                                                                                  | ,443                                                                                                                                        | ,653                                                                                                                            | ,704                                                                                                                         | 1                                                                                                                                                                | ,567                                                                                                                                                               | ,569                                                                                                                                                                          | ,604                                                                                                                     | ,611                                                                                                                                        | ,451                                                                                                                                       | ,466                                                                                                                                          | ,548                                                                                                                                                                      | ,655                                                                                                                                                       | ,587                                                                                                                                  | ,505                                                                                                                                                         | ,569                                                                                                                                                     | ,541                                                                                                                                                 |      |
| Korrelation nach Pearson | ,000                                                                                                                        | ,000                                                                                                                                                   | ,000                                                                                                                                         | ,000                                                                                                                                           | ,000                                                                                                                         | ,000                                                                                                                                                  | ,000                                                                                                                                        | ,000                                                                                                                            | ,000                                                                                                                         | ,000                                                                                                                                                             | ,000                                                                                                                                                               | ,000                                                                                                                                                                          | ,000                                                                                                                     | ,000                                                                                                                                        | ,000                                                                                                                                       | ,000                                                                                                                                          | ,000                                                                                                                                                                      | ,000                                                                                                                                                       | ,000                                                                                                                                  | ,000                                                                                                                                                         | ,000                                                                                                                                                     | ,000                                                                                                                                                 | ,000 |

Korrelationen<sup>a</sup>

|                          | [ Ich kann mir konkrete Schreibziele setzen. ] Um Ihnen die Beantwortung zu erleichtern, können Sie die Antwort in Prozent geben | [ Ich kann meine Ideen auch bei einem komplexen Thema gut organisieren. ] Um Ihnen die Beantwortung zu erleichtern, können Sie die Antwort in Prozent geben | [ Ich kann mich dazu motivieren mit dem Schreiben anzufangen. ] Um Ihnen die Beantwortung zu erleichtern, können Sie die Antwort in Prozent geben | [ Ich kann Probleme, die beim Schreiben aufkommen, überwinden. ] Um Ihnen die Beantwortung zu erleichtern, können Sie die Antwort in Prozent geben | [ Ich kann meine Interesse am Schreiben steigern. ] Um Ihnen die Beantwortung zu erleichtern, können Sie die Antwort in Prozent geben | [ Ich kann mich auf das Schreiben konzentrieren. ] Um Ihnen die Beantwortung zu erleichtern, können Sie die Antwort in Prozent geben | [ Ich kann meine Schreibzeit effektiv nutzen. ] Um Ihnen die Beantwortung zu erleichtern, können Sie die Antwort in Prozent geben | [ Ich kann mir meine Zeit so einteilen, dass ich konzentriert an meinem Text arbeite. ] Um Ihnen die Beantwortung zu erleichtern, können Sie die Antwort in Prozent geben | [ Ich kann mir meinen Schreibplatz so gestalten, dass ich ungestört schreiben kann. ] Um Ihnen die Beantwortung zu erleichtern, können Sie die Antwort in Prozent geben | [ Ich kann beim Schreiben erfolgreich sein, wenn ich merke, dass es nicht erfolgreich ist. ] Um Ihnen die Beantwortung zu erleichtern, können Sie die Antwort in Prozent geben | [ Ich kann beim Schreiben meine Vorankommen nachvollziehen. ] Um Ihnen die Beantwortung zu erleichtern, können Sie die Antwort in Prozent geben | [ Ich kann ausdauernd an meinem Text arbeiten. ] Um Ihnen die Beantwortung zu erleichtern, können Sie die Antwort in Prozent geben | [ Ich kann eine Schreibblockade lösen und danach weiterschreiben. ] Um Ihnen die Beantwortung zu erleichtern, können Sie die Antwort in Prozent geben | [ Ich kann die Qualität meines Textes realistisch einschätzen. ] Um Ihnen die Beantwortung zu erleichtern, können Sie die Antwort in Prozent geben | [ Ich kann die von mir selbst gesetzten Kriterien für die Qualität meiner Texte erreichen. ] Um Ihnen die Beantwortung zu erleichtern, können Sie die Antwort in Prozent geben | [ Ich kann die Teilziele beim Schreiben erreichen. ] Um Ihnen die Beantwortung zu erleichtern, können Sie die Antwort in Prozent geben | [ Ich kann ein gutes Gefühl für das Vorankommen beim Schreiben entwickeln. ] Um Ihnen die Beantwortung zu erleichtern, können Sie die Antwort in Prozent geben | [ Ich kann vermeiden, dass ich einen Fehler beim nächsten Mal mache. ] Um Ihnen die Beantwortung zu erleichtern, können Sie die Antwort in Prozent geben | [ Ich kann bei Schreibprojekten meine Erfahrung verbessern. ] Um Ihnen die Beantwortung zu erleichtern, können Sie die Antwort in Prozent geben | [ Ich kann einschätzen, was ich beim nächsten Mal anders machen muss. ] Um Ihnen die Beantwortung zu erleichtern, können Sie die Antwort in Prozent geben |
|--------------------------|----------------------------------------------------------------------------------------------------------------------------------|-------------------------------------------------------------------------------------------------------------------------------------------------------------|---------------------------------------------------------------------------------------------------------------------------------------------------|----------------------------------------------------------------------------------------------------------------------------------------------------|---------------------------------------------------------------------------------------------------------------------------------------|--------------------------------------------------------------------------------------------------------------------------------------|-----------------------------------------------------------------------------------------------------------------------------------|---------------------------------------------------------------------------------------------------------------------------------------------------------------------------|-------------------------------------------------------------------------------------------------------------------------------------------------------------------------|--------------------------------------------------------------------------------------------------------------------------------------------------------------------------------|-------------------------------------------------------------------------------------------------------------------------------------------------|------------------------------------------------------------------------------------------------------------------------------------|-------------------------------------------------------------------------------------------------------------------------------------------------------|----------------------------------------------------------------------------------------------------------------------------------------------------|--------------------------------------------------------------------------------------------------------------------------------------------------------------------------------|----------------------------------------------------------------------------------------------------------------------------------------|----------------------------------------------------------------------------------------------------------------------------------------------------------------|----------------------------------------------------------------------------------------------------------------------------------------------------------|-------------------------------------------------------------------------------------------------------------------------------------------------|-----------------------------------------------------------------------------------------------------------------------------------------------------------|
| Korrelation nach Pearson | ,295                                                                                                                             | ,346                                                                                                                                                        | ,319                                                                                                                                              | ,260                                                                                                                                               | ,436                                                                                                                                  | ,466                                                                                                                                 | ,396                                                                                                                              | ,528                                                                                                                                                                      | ,496                                                                                                                                                                    | ,567                                                                                                                                                                           | 1                                                                                                                                               | ,479                                                                                                                               | ,414                                                                                                                                                  | ,336                                                                                                                                               | ,394                                                                                                                                                                           | ,416                                                                                                                                   | ,505                                                                                                                                                           | ,489                                                                                                                                                     | ,487                                                                                                                                            | ,417                                                                                                                                                      |
| Korrelation nach Pearson | ,001                                                                                                                             | ,000                                                                                                                                                        | ,000                                                                                                                                              | ,004                                                                                                                                               | ,000                                                                                                                                  | ,000                                                                                                                                 | ,000                                                                                                                              | ,000                                                                                                                                                                      | ,000                                                                                                                                                                    | ,000                                                                                                                                                                           | ,000                                                                                                                                            | ,000                                                                                                                               | ,000                                                                                                                                                  | ,000                                                                                                                                               | ,000                                                                                                                                                                           | ,000                                                                                                                                   | ,000                                                                                                                                                           | ,000                                                                                                                                                     | ,000                                                                                                                                            | ,000                                                                                                                                                      |
| Korrelation nach Pearson | ,427                                                                                                                             | ,494                                                                                                                                                        | ,306                                                                                                                                              | ,529                                                                                                                                               | ,417                                                                                                                                  | ,382                                                                                                                                 | ,517                                                                                                                              | ,512                                                                                                                                                                      | ,611                                                                                                                                                                    | ,569                                                                                                                                                                           | ,490                                                                                                                                            | ,534                                                                                                                               | ,614                                                                                                                                                  | ,584                                                                                                                                               | ,605                                                                                                                                                                           | ,581                                                                                                                                   | ,616                                                                                                                                                           | ,618                                                                                                                                                     | ,530                                                                                                                                            | ,539                                                                                                                                                      |
| Korrelation nach Pearson | ,000                                                                                                                             | ,000                                                                                                                                                        | ,001                                                                                                                                              | ,000                                                                                                                                               | ,000                                                                                                                                  | ,000                                                                                                                                 | ,000                                                                                                                              | ,000                                                                                                                                                                      | ,000                                                                                                                                                                    | ,000                                                                                                                                                                           | ,000                                                                                                                                            | ,000                                                                                                                               | ,000                                                                                                                                                  | ,000                                                                                                                                               | ,000                                                                                                                                                                           | ,000                                                                                                                                   | ,000                                                                                                                                                           | ,000                                                                                                                                                     | ,000                                                                                                                                            | ,000                                                                                                                                                      |
| Korrelation nach Pearson | ,423                                                                                                                             | ,421                                                                                                                                                        | ,264                                                                                                                                              | ,582                                                                                                                                               | ,465                                                                                                                                  | ,350                                                                                                                                 | ,516                                                                                                                              | ,562                                                                                                                                                                      | ,521                                                                                                                                                                    | ,604                                                                                                                                                                           | ,473                                                                                                                                            | ,535                                                                                                                               | ,543                                                                                                                                                  | ,568                                                                                                                                               | ,620                                                                                                                                                                           | ,614                                                                                                                                   | ,720                                                                                                                                                           | ,560                                                                                                                                                     | ,488                                                                                                                                            | ,453                                                                                                                                                      |
| Korrelation nach Pearson | ,000                                                                                                                             | ,000                                                                                                                                                        | ,003                                                                                                                                              | ,000                                                                                                                                               | ,000                                                                                                                                  | ,000                                                                                                                                 | ,000                                                                                                                              | ,000                                                                                                                                                                      | ,000                                                                                                                                                                    | ,000                                                                                                                                                                           | ,000                                                                                                                                            | ,000                                                                                                                               | ,000                                                                                                                                                  | ,000                                                                                                                                               | ,000                                                                                                                                                                           | ,000                                                                                                                                   | ,000                                                                                                                                                           | ,000                                                                                                                                                     | ,000                                                                                                                                            | ,000                                                                                                                                                      |
| Korrelation nach Pearson | ,342                                                                                                                             | ,426                                                                                                                                                        | ,383                                                                                                                                              | ,532                                                                                                                                               | ,568                                                                                                                                  | ,459                                                                                                                                 | ,495                                                                                                                              | ,627                                                                                                                                                                      | ,564                                                                                                                                                                    | ,611                                                                                                                                                                           | ,479                                                                                                                                            | ,536                                                                                                                               | ,536                                                                                                                                                  | ,421                                                                                                                                               | ,602                                                                                                                                                                           | ,586                                                                                                                                   | ,500                                                                                                                                                           | ,500                                                                                                                                                     | ,389                                                                                                                                            | ,439                                                                                                                                                      |
| Korrelation nach Pearson | ,000                                                                                                                             | ,000                                                                                                                                                        | ,000                                                                                                                                              | ,000                                                                                                                                               | ,000                                                                                                                                  | ,000                                                                                                                                 | ,000                                                                                                                              | ,000                                                                                                                                                                      | ,000                                                                                                                                                                    | ,000                                                                                                                                                                           | ,000                                                                                                                                            | ,000                                                                                                                               | ,000                                                                                                                                                  | ,000                                                                                                                                               | ,000                                                                                                                                                                           | ,000                                                                                                                                   | ,000                                                                                                                                                           | ,000                                                                                                                                                     | ,000                                                                                                                                            | ,000                                                                                                                                                      |
| Korrelation nach Pearson | ,353                                                                                                                             | ,409                                                                                                                                                        | ,340                                                                                                                                              | ,569                                                                                                                                               | ,393                                                                                                                                  | ,363                                                                                                                                 | ,433                                                                                                                              | ,438                                                                                                                                                                      | ,446                                                                                                                                                                    | ,451                                                                                                                                                                           | ,414                                                                                                                                            | ,536                                                                                                                               | ,543                                                                                                                                                  | ,322                                                                                                                                               | ,508                                                                                                                                                                           | ,454                                                                                                                                   | ,388                                                                                                                                                           | ,339                                                                                                                                                     | ,336                                                                                                                                            | ,336                                                                                                                                                      |
| Korrelation nach Pearson | ,000                                                                                                                             | ,000                                                                                                                                                        | ,000                                                                                                                                              | ,000                                                                                                                                               | ,000                                                                                                                                  | ,000                                                                                                                                 | ,000                                                                                                                              | ,000                                                                                                                                                                      | ,000                                                                                                                                                                    | ,000                                                                                                                                                                           | ,000                                                                                                                                            | ,000                                                                                                                               | ,000                                                                                                                                                  | ,000                                                                                                                                               | ,000                                                                                                                                                                           | ,000                                                                                                                                   | ,000                                                                                                                                                           | ,000                                                                                                                                                     | ,000                                                                                                                                            | ,000                                                                                                                                                      |
| Korrelation nach Pearson | ,330                                                                                                                             | ,564                                                                                                                                                        | ,089                                                                                                                                              | ,441                                                                                                                                               | ,317                                                                                                                                  | ,216                                                                                                                                 | ,353                                                                                                                              | ,436                                                                                                                                                                      | ,539                                                                                                                                                                    | ,466                                                                                                                                                                           | ,336                                                                                                                                            | ,421                                                                                                                               | ,322                                                                                                                                                  | 1                                                                                                                                                  | ,564                                                                                                                                                                           | ,498                                                                                                                                   | ,557                                                                                                                                                           | ,454                                                                                                                                                     | ,426                                                                                                                                            | ,426                                                                                                                                                      |
| Korrelation nach Pearson | ,000                                                                                                                             | ,000                                                                                                                                                        | ,330                                                                                                                                              | ,000                                                                                                                                               | ,000                                                                                                                                  | ,017                                                                                                                                 | ,000                                                                                                                              | ,000                                                                                                                                                                      | ,000                                                                                                                                                                    | ,000                                                                                                                                                                           | ,000                                                                                                                                            | ,000                                                                                                                               | ,000                                                                                                                                                  | ,000                                                                                                                                               | ,000                                                                                                                                                                           | ,000                                                                                                                                   | ,000                                                                                                                                                           | ,000                                                                                                                                                     | ,000                                                                                                                                            | ,000                                                                                                                                                      |
| Korrelation nach Pearson | ,366                                                                                                                             | ,584                                                                                                                                                        | ,353                                                                                                                                              | ,575                                                                                                                                               | ,518                                                                                                                                  | ,517                                                                                                                                 | ,535                                                                                                                              | ,674                                                                                                                                                                      | ,554                                                                                                                                                                    | ,548                                                                                                                                                                           | ,394                                                                                                                                            | ,620                                                                                                                               | ,561                                                                                                                                                  | ,564                                                                                                                                               | ,588                                                                                                                                                                           | ,589                                                                                                                                   | ,526                                                                                                                                                           | ,464                                                                                                                                                     | ,465                                                                                                                                            | ,465                                                                                                                                                      |
| Korrelation nach Pearson | ,000                                                                                                                             | ,000                                                                                                                                                        | ,000                                                                                                                                              | ,000                                                                                                                                               | ,000                                                                                                                                  | ,000                                                                                                                                 | ,000                                                                                                                              | ,000                                                                                                                                                                      | ,000                                                                                                                                                                    | ,000                                                                                                                                                                           | ,000                                                                                                                                            | ,000                                                                                                                               | ,000                                                                                                                                                  | ,000                                                                                                                                               | ,000                                                                                                                                                                           | ,000                                                                                                                                   | ,000                                                                                                                                                           | ,000                                                                                                                                                     | ,000                                                                                                                                            | ,000                                                                                                                                                      |
| Korrelation nach Pearson | ,515                                                                                                                             | ,440                                                                                                                                                        | ,406                                                                                                                                              | ,493                                                                                                                                               | ,369                                                                                                                                  | ,440                                                                                                                                 | ,504                                                                                                                              | ,615                                                                                                                                                                      | ,597                                                                                                                                                                    | ,655                                                                                                                                                                           | ,416                                                                                                                                            | ,602                                                                                                                               | ,508                                                                                                                                                  | ,397                                                                                                                                               | 1                                                                                                                                                                              | ,652                                                                                                                                   | ,497                                                                                                                                                           | ,509                                                                                                                                                     | ,480                                                                                                                                            | ,480                                                                                                                                                      |
| Korrelation nach Pearson | ,000                                                                                                                             | ,000                                                                                                                                                        | ,000                                                                                                                                              | ,000                                                                                                                                               | ,000                                                                                                                                  | ,000                                                                                                                                 | ,000                                                                                                                              | ,000                                                                                                                                                                      | ,000                                                                                                                                                                    | ,000                                                                                                                                                                           | ,000                                                                                                                                            | ,000                                                                                                                               | ,000                                                                                                                                                  | ,000                                                                                                                                               | ,000                                                                                                                                                                           | ,000                                                                                                                                   | ,000                                                                                                                                                           | ,000                                                                                                                                                     | ,000                                                                                                                                            | ,000                                                                                                                                                      |
| Korrelation nach Pearson | ,513                                                                                                                             | ,456                                                                                                                                                        | ,467                                                                                                                                              | ,484                                                                                                                                               | ,510                                                                                                                                  | ,531                                                                                                                                 | ,605                                                                                                                              | ,589                                                                                                                                                                      | ,596                                                                                                                                                                    | ,587                                                                                                                                                                           | ,505                                                                                                                                            | ,566                                                                                                                               | ,454                                                                                                                                                  | ,498                                                                                                                                               | ,652                                                                                                                                                                           | 1                                                                                                                                      | ,640                                                                                                                                                           | ,548                                                                                                                                                     | ,472                                                                                                                                            | ,472                                                                                                                                                      |
| Korrelation nach Pearson | ,000                                                                                                                             | ,000                                                                                                                                                        | ,000                                                                                                                                              | ,000                                                                                                                                               | ,000                                                                                                                                  | ,000                                                                                                                                 | ,000                                                                                                                              | ,000                                                                                                                                                                      | ,000                                                                                                                                                                    | ,000                                                                                                                                                                           | ,000                                                                                                                                            | ,000                                                                                                                               | ,000                                                                                                                                                  | ,000                                                                                                                                               | ,000                                                                                                                                                                           | ,000                                                                                                                                   | ,000                                                                                                                                                           | ,000                                                                                                                                                     | ,000                                                                                                                                            | ,000                                                                                                                                                      |
| Korrelation nach Pearson | ,387                                                                                                                             | ,431                                                                                                                                                        | ,265                                                                                                                                              | ,531                                                                                                                                               | ,479                                                                                                                                  | ,418                                                                                                                                 | ,461                                                                                                                              | ,562                                                                                                                                                                      | ,573                                                                                                                                                                    | ,505                                                                                                                                                                           | ,489                                                                                                                                            | ,500                                                                                                                               | ,388                                                                                                                                                  | ,557                                                                                                                                               | ,526                                                                                                                                                                           | ,640                                                                                                                                   | 1                                                                                                                                                              | ,657                                                                                                                                                     | ,588                                                                                                                                            | ,588                                                                                                                                                      |
| Korrelation nach Pearson | ,000                                                                                                                             | ,000                                                                                                                                                        | ,003                                                                                                                                              | ,000                                                                                                                                               | ,000                                                                                                                                  | ,000                                                                                                                                 | ,000                                                                                                                              | ,000                                                                                                                                                                      | ,000                                                                                                                                                                    | ,000                                                                                                                                                                           | ,000                                                                                                                                            | ,000                                                                                                                               | ,000                                                                                                                                                  | ,000                                                                                                                                               | ,000                                                                                                                                                                           | ,000                                                                                                                                   | ,000                                                                                                                                                           | ,000                                                                                                                                                     | ,000                                                                                                                                            | ,000                                                                                                                                                      |
| Korrelation nach Pearson | ,404                                                                                                                             | ,376                                                                                                                                                        | ,281                                                                                                                                              | ,408                                                                                                                                               | ,384                                                                                                                                  | ,407                                                                                                                                 | ,398                                                                                                                              | ,524                                                                                                                                                                      | ,562                                                                                                                                                                    | ,589                                                                                                                                                                           | ,487                                                                                                                                            | ,389                                                                                                                               | ,339                                                                                                                                                  | ,454                                                                                                                                               | ,464                                                                                                                                                                           | ,548                                                                                                                                   | ,657                                                                                                                                                           | 1                                                                                                                                                        | ,573                                                                                                                                            | ,573                                                                                                                                                      |
| Korrelation nach Pearson | ,000                                                                                                                             | ,000                                                                                                                                                        | ,002                                                                                                                                              | ,000                                                                                                                                               | ,000                                                                                                                                  | ,000                                                                                                                                 | ,000                                                                                                                              | ,000                                                                                                                                                                      | ,000                                                                                                                                                                    | ,000                                                                                                                                                                           | ,000                                                                                                                                            | ,000                                                                                                                               | ,000                                                                                                                                                  | ,000                                                                                                                                               | ,000                                                                                                                                                                           | ,000                                                                                                                                   | ,000                                                                                                                                                           | ,000                                                                                                                                                     | ,000                                                                                                                                            | ,000                                                                                                                                                      |
| Korrelation nach Pearson | ,280                                                                                                                             | ,304                                                                                                                                                        | ,307                                                                                                                                              | ,376                                                                                                                                               | ,328                                                                                                                                  | ,366                                                                                                                                 | ,489                                                                                                                              | ,540                                                                                                                                                                      | ,485                                                                                                                                                                    | ,541                                                                                                                                                                           | ,417                                                                                                                                            | ,439                                                                                                                               | ,336                                                                                                                                                  | ,426                                                                                                                                               | ,480                                                                                                                                                                           | ,472                                                                                                                                   | ,588                                                                                                                                                           | ,573                                                                                                                                                     | 1                                                                                                                                               | 1                                                                                                                                                         |
| Korrelation nach Pearson | ,002                                                                                                                             | ,001                                                                                                                                                        | ,001                                                                                                                                              | ,000                                                                                                                                               | ,000                                                                                                                                  | ,000                                                                                                                                 | ,000                                                                                                                              | ,000                                                                                                                                                                      | ,000                                                                                                                                                                    | ,000                                                                                                                                                                           | ,000                                                                                                                                            | ,000                                                                                                                               | ,000                                                                                                                                                  | ,000                                                                                                                                               | ,000                                                                                                                                                                           | ,000                                                                                                                                   | ,000                                                                                                                                                           | ,000                                                                                                                                                     | ,000                                                                                                                                            | ,000                                                                                                                                                      |

a. Listenweise N=121

Matrix

Run MATRIX procedure:

MGET created matrix CR.  
 The matrix has 22 rows and 22 columns.  
 The matrix was read from the record(s) of row type CORR.

Raw Data Eigenvalues

| Root      | Eigen.    |
|-----------|-----------|
| 1.000000  | 10.674551 |
| 2.000000  | .867971   |
| 3.000000  | .723444   |
| 4.000000  | .483888   |
| 5.000000  | .428046   |
| 6.000000  | .349314   |
| 7.000000  | .260270   |
| 8.000000  | .225977   |
| 9.000000  | .177070   |
| 10.000000 | .132203   |
| 11.000000 | .093159   |
| 12.000000 | .041323   |
| 13.000000 | .011564   |
| 14.000000 | -.038166  |
| 15.000000 | -.055363  |
| 16.000000 | -.089959  |
| 17.000000 | -.111855  |
| 18.000000 | -.120434  |
| 19.000000 | -.156540  |
| 20.000000 | -.165601  |
| 21.000000 | -.198495  |
| 22.000000 | -.226472  |

----- END MATRIX -----

**Correlation**

Listwise deletion

| Number of cases | Number of cases excluded |
|-----------------|--------------------------|
| 121             | 0                        |

**Number of Components/Factors**

**Number of Components/Factors estimated for the following Correlation Matrix**

| Correlation Matrix | Missing values |
|--------------------|----------------|
| Pearson            | listwise       |

**Velicer's MAP values**

|    | Squared average partial correlations | 4th average partial correlations |
|----|--------------------------------------|----------------------------------|
| 0  | ,234                                 | ,063                             |
| 1  | ,018                                 | ,001                             |
| 2  | ,019                                 | ,001                             |
| 3  | ,020                                 | ,001                             |
| 4  | ,023                                 | ,002                             |
| 5  | ,026                                 | ,002                             |
| 6  | ,029                                 | ,003                             |
| 7  | ,035                                 | ,004                             |
| 8  | ,041                                 | ,005                             |
| 9  | ,046                                 | ,006                             |
| 10 | ,053                                 | ,009                             |
| 11 | ,061                                 | ,014                             |
| 12 | ,071                                 | ,015                             |
| 13 | ,083                                 | ,020                             |
| 14 | ,097                                 | ,026                             |
| 15 | ,118                                 | ,038                             |
| 16 | ,142                                 | ,056                             |
| 17 | ,180                                 | ,073                             |
| 18 | ,230                                 | ,115                             |
| 19 | ,336                                 | ,200                             |
| 20 | ,501                                 | ,371                             |

**Velicer's Minimum Average Partial Test**

|               | Velicer's Minimum |                      |
|---------------|-------------------|----------------------|
|               | Minimum           | Components to retain |
| Squared MAP   | ,018              | 1                    |
| 4th power MAP | ,001              | 1                    |

FACTOR  
/VARIABLES SWSRS\_prä\_aa\_2

```

SWSRS prä_aa_6 SWSRS prä_sm_1 SWSRS prä_sm_3 SWSRS prä_sm_7 SWSRS prä_sm_8
SWSRS akt_sk_1 SWSRS akt_sk_7
SWSRS akt_sk_15 SWSRS akt_sk_17
SWSRS akt_sk_19
SWSRS akt_sb_2 SWSRS akt_sb_4 SWSRS akt_sb_7
SWSRS akt_sb_9 SWSRS post_sb_1 SWSRS post_sb_3
SWSRS post_sb_4 SWSRS post_sr_2
SWSRS post_sr_4 SWSRS post_sr_6 SWSRS post_sr_7
/MISSING LISTWISE
/ANALYSIS SWSRS prä_aa_2
SWSRS prä_aa_6 SWSRS prä_sm_1 SWSRS prä_sm_3 SWSRS prä_sm_7 SWSRS prä_sm_8
SWSRS akt_sk_1 SWSRS akt_sk_7
SWSRS akt_sk_15 SWSRS akt_sk_17
SWSRS akt_sk_19
SWSRS akt_sb_2 SWSRS akt_sb_4 SWSRS akt_sb_7
SWSRS akt_sb_9 SWSRS post_sb_1 SWSRS post_sb_3
SWSRS post_sb_4 SWSRS post_sr_2
SWSRS post_sr_4 SWSRS post_sr_6 SWSRS post_sr_7
/PRINT UNIVARIATE INITIAL CORRELATION KMO REPR AIC EXTRACTION ROTATION
/PLOT EIGEN
/CRITERIA FACTORS(1) ITERATE(100)
/EXTRACTION PAF
/CRITERIA ITERATE(100)
/ROTATION PROMAX(4)
/METHOD=CORRELATION.

```

## Faktorenanalyse

Deskriptive Statistiken

|                                                                                                                                                                                    | Mittelwert | Standardabweichung | Analyse N |
|------------------------------------------------------------------------------------------------------------------------------------------------------------------------------------|------------|--------------------|-----------|
| <input type="checkbox"/> Ich kann mir konkrete Schreibziele setzen. ] Um Ihnen die Beantwortung zu erleichtern, können Sie die Antwort in Prozent geben                            | 7,05       | 2,866              | 121       |
| <input type="checkbox"/> Ich kann meine Ideen auch bei einem komplexen Thema gut organisieren. ] Um Ihnen die Beantwortung zu erleichtern, können Sie die Antwort in Prozent geben | 7,17       | 2,502              | 121       |
| <input type="checkbox"/> Ich kann mich dazu motivieren mit dem Schreiben anzufangen. ] Um Ihnen die Beantwortung zu erleichtern, können Sie die Antwort in Prozent geben           | 6,17       | 3,057              | 121       |
| <input type="checkbox"/> Ich kann Probleme, die beim Schreiben auftauchen, überwinden. ] Um Ihnen die Beantwortung zu erleichtern, können Sie die Antwort in Prozent geben         | 7,73       | 2,244              | 121       |
| <input type="checkbox"/> Ich kann Interesse für das Schreiben entwickeln. ] Um Ihnen die Beantwortung zu erleichtern, können Sie die Antwort in Prozent geben                      | 7,64       | 2,787              | 121       |
| <input type="checkbox"/> Ich kann leicht Wege finden mein Interesse am Schreiben zu steigern. ] Um Ihnen die Beantwortung zu erleichtern, können Sie die Antwort in Prozent geben  | 5,87       | 2,735              | 121       |
| <input type="checkbox"/> Ich kann mein Vorgehen beim Schreiben überwachen. ] Um Ihnen die Beantwortung zu erleichtern, können Sie die Antwort in Prozent geben                     | 6,28       | 2,829              | 121       |
| <input type="checkbox"/> Ich kann mich auf das Schreiben konzentrieren. ] Um Ihnen die Beantwortung zu erleichtern, können Sie die Antwort in Prozent geben                        | 7,54       | 2,717              | 121       |

### Deskriptive Statistiken

|                                                                                                                                                                                                           | Mittelwert | Standardabweichung | Analyse N |
|-----------------------------------------------------------------------------------------------------------------------------------------------------------------------------------------------------------|------------|--------------------|-----------|
| <input type="checkbox"/> Ich kann meine Schreibzeit effektiv nutzen. ] Um Ihnen die Beantwortung zu erleichtern, können Sie die Antwort in Prozent geben                                                  | 6,56       | 2,834              | 121       |
| <input type="checkbox"/> Ich kann mir meine Zeit so einteilen, dass ich konzentriert an meinem Text arbeite. ] Um Ihnen die Beantwortung zu erleichtern, können Sie die Antwort in Prozent geben          | 6,67       | 2,879              | 121       |
| <input type="checkbox"/> Ich kann mir meinen Schreibplatz so gestalten, dass ich ungestört schreiben kann. ] Um Ihnen die Beantwortung zu erleichtern, können Sie die Antwort in Prozent geben            | 7,31       | 3,019              | 121       |
| <input type="checkbox"/> Ich kann mein Vorgehen beim Schreiben ändern, wenn ich merke, dass es nicht erfolgreich ist. ] Um Ihnen die Beantwortung zu erleichtern, können Sie die Antwort in Prozent geben | 7,12       | 2,762              | 121       |
| <input type="checkbox"/> Ich kann mein Vorankommen beim Schreiben nachvollziehen. ] Um Ihnen die Beantwortung zu erleichtern, können Sie die Antwort in Prozent geben                                     | 7,79       | 2,474              | 121       |
| <input type="checkbox"/> Ich kann ausdauernd an meinem Text arbeiten. ] Um Ihnen die Beantwortung zu erleichtern, können Sie die Antwort in Prozent geben                                                 | 7,32       | 2,905              | 121       |
| <input type="checkbox"/> Ich kann eine Schreibblockade lösen und danach weiterschreiben. ] Um Ihnen die Beantwortung zu erleichtern, können Sie die Antwort in Prozent geben                              | 6,40       | 2,651              | 121       |
| <input type="checkbox"/> Ich kann die Qualität meines Textes realistisch einschätzen. ] Um Ihnen die Beantwortung zu erleichtern, können Sie die Antwort in Prozent geben                                 | 7,49       | 2,589              | 121       |



Deskriptive Statistiken

|                                                                                                                                                                                                       | Mittelwert | Standardabweichung | Analyse N |
|-------------------------------------------------------------------------------------------------------------------------------------------------------------------------------------------------------|------------|--------------------|-----------|
| <input type="checkbox"/> Ich kann die von mir selbst gesetzten Kriterien für die Qualität meiner Texte erreichen. ] Um Ihnen die Beantwortung zu erleichtern, können Sie die Antwort in Prozent geben | 7,84       | 2,429              | 121       |
| <input type="checkbox"/> Ich kann die von mir selbst gesetzten Teilziele beim Schreiben erreichen. ] Um Ihnen die Beantwortung zu erleichtern, können Sie die Antwort in Prozent geben                | 7,19       | 2,919              | 121       |
| <input type="checkbox"/> Ich kann ein gutes Gefühl für das Vorankommen beim Schreiben entwickeln. ] Um Ihnen die Beantwortung zu erleichtern, können Sie die Antwort in Prozent geben                 | 7,20       | 2,747              | 121       |
| <input type="checkbox"/> Ich kann vermeiden, dass ich einen Fehler beim nächsten Mal wieder mache. ] Um Ihnen die Beantwortung zu erleichtern, können Sie die Antwort in Prozent geben                | 7,60       | 2,594              | 121       |
| <input type="checkbox"/> Ich kann mein Vorgehen bei Schreibprojekten durch Erfahrung verbessern. ] Um Ihnen die Beantwortung zu erleichtern, können Sie die Antwort in Prozent geben                  | 7,97       | 2,674              | 121       |
| <input type="checkbox"/> Ich kann einschätzen, was ich beim nächsten Mal anders machen muss. ] Um Ihnen die Beantwortung zu erleichtern, können Sie die Antwort in Prozent geben                      | 7,46       | 2,513              | 121       |



Korrelationsmatrix

|                                                                                                                                                                            | [ Ich kann mir konkrete Schreibziele setzen. ] Um Ihnen die Beantwortung zu erleichtern, können Sie die Antwort in Prozent geben | [ Ich kann meine Ideen auch bei einem komplexen Thema gut organisieren. ] Um Ihnen die Beantwortung zu erleichtern, können Sie die Antwort in Prozent geben | [ Ich kann mich dazu motivieren mit dem Schreiben anzufangen. ] Um Ihnen die Beantwortung zu erleichtern, können Sie die Antwort in Prozent geben | [ Ich kann leicht Wege finden mein Interesse am Schreiben zu steigern. ] Um Ihnen die Beantwortung zu erleichtern, können Sie die Antwort in Prozent geben | [ Ich kann meine Schreibzeit effektiv nutzen. ] Um Ihnen die Beantwortung zu erleichtern, können Sie die Antwort in Prozent geben | [ Ich kann mir meine Zeit so einteilen, dass ich konzentriert an meinem Text arbeite. ] Um Ihnen die Beantwortung zu erleichtern, können Sie die Antwort in Prozent geben | [ Ich kann mir meinen Schreibplatz so gestalten, dass ich ungestört schreiben kann. ] Um Ihnen die Beantwortung zu erleichtern, können Sie die Antwort in Prozent geben | [ Ich kann beim Schreiben ändern, wenn ich merke, dass es nicht erfolgreich ist. ] Um Ihnen die Beantwortung zu erleichtern, können Sie die Antwort in Prozent geben | [ Ich kann beim Vorankommen nachvollziehen. ] Um Ihnen die Beantwortung zu erleichtern, können Sie die Antwort in Prozent geben | [ Ich kann ausdauernd an meinem Text arbeiten. ] Um Ihnen die Beantwortung zu erleichtern, können Sie die Antwort in Prozent geben | [ Ich kann eine Schreibblockade lösen und danach weiterschreiben. ] Um Ihnen die Beantwortung zu erleichtern, können Sie die Antwort in Prozent geben | [ Ich kann die Qualität meines Textes einschätzen. ] Um Ihnen die Beantwortung zu erleichtern, können Sie die Antwort in Prozent geben | [ Ich kann meine Schreibzeit konzentrieren. ] Um Ihnen die Beantwortung zu erleichtern, können Sie die Antwort in Prozent geben | [ Ich kann mich auf das Schreiben konzentrieren. ] Um Ihnen die Beantwortung zu erleichtern, können Sie die Antwort in Prozent geben | [ Ich kann beim Schreiben überwinden. ] Um Ihnen die Beantwortung zu erleichtern, können Sie die Antwort in Prozent geben | [ Ich kann meine Probleme beim Schreiben aufzudecken. ] Um Ihnen die Beantwortung zu erleichtern, können Sie die Antwort in Prozent geben | [ Ich kann mich dazu motivieren mit dem Schreiben anzufangen. ] Um Ihnen die Beantwortung zu erleichtern, können Sie die Antwort in Prozent geben | [ Ich kann meine Ideen auch bei einem komplexen Thema gut organisieren. ] Um Ihnen die Beantwortung zu erleichtern, können Sie die Antwort in Prozent geben | [ Ich kann mir konkrete Schreibziele setzen. ] Um Ihnen die Beantwortung zu erleichtern, können Sie die Antwort in Prozent geben |      |      |      |      |      |      |      |       |       |
|----------------------------------------------------------------------------------------------------------------------------------------------------------------------------|----------------------------------------------------------------------------------------------------------------------------------|-------------------------------------------------------------------------------------------------------------------------------------------------------------|---------------------------------------------------------------------------------------------------------------------------------------------------|------------------------------------------------------------------------------------------------------------------------------------------------------------|-----------------------------------------------------------------------------------------------------------------------------------|---------------------------------------------------------------------------------------------------------------------------------------------------------------------------|-------------------------------------------------------------------------------------------------------------------------------------------------------------------------|----------------------------------------------------------------------------------------------------------------------------------------------------------------------|---------------------------------------------------------------------------------------------------------------------------------|------------------------------------------------------------------------------------------------------------------------------------|-------------------------------------------------------------------------------------------------------------------------------------------------------|----------------------------------------------------------------------------------------------------------------------------------------|---------------------------------------------------------------------------------------------------------------------------------|--------------------------------------------------------------------------------------------------------------------------------------|---------------------------------------------------------------------------------------------------------------------------|-------------------------------------------------------------------------------------------------------------------------------------------|---------------------------------------------------------------------------------------------------------------------------------------------------|-------------------------------------------------------------------------------------------------------------------------------------------------------------|----------------------------------------------------------------------------------------------------------------------------------|------|------|------|------|------|------|------|-------|-------|
| [ Ich kann eine Schreibblockade lösen und danach weiterschreiben. ] Um Ihnen die Beantwortung zu erleichtern, können Sie die Antwort in Prozent geben                      | .336                                                                                                                             | .339                                                                                                                                                        | .388                                                                                                                                              | .454                                                                                                                                                       | .508                                                                                                                              | .561                                                                                                                                                                      | .322                                                                                                                                                                    | 1,000                                                                                                                                                                | .536                                                                                                                            | .543                                                                                                                               | .614                                                                                                                                                  | .414                                                                                                                                   | .451                                                                                                                            | .446                                                                                                                                 | .438                                                                                                                      | .433                                                                                                                                      | .363                                                                                                                                              | .393                                                                                                                                                        | .569                                                                                                                             | .340 | .409 | .353 | .396 | .515 | .513 | .387 | .404  | .280  |
| [ Ich kann die Qualität meines Textes einschätzen. ] Um Ihnen die Beantwortung zu erleichtern, können Sie die Antwort in Prozent geben                                     | .426                                                                                                                             | .454                                                                                                                                                        | .557                                                                                                                                              | .498                                                                                                                                                       | .397                                                                                                                              | .564                                                                                                                                                                      | 1,000                                                                                                                                                                   | .322                                                                                                                                                                 | .421                                                                                                                            | .568                                                                                                                               | .564                                                                                                                                                  | 1,000                                                                                                                                  | .397                                                                                                                            | .508                                                                                                                                 | .602                                                                                                                      | .605                                                                                                                                      | .581                                                                                                                                              | .614                                                                                                                                                        | .568                                                                                                                             | .421 | .536 | .322 | .561 | .564 | .588 | .652 | .497  | .509  |
| [ Ich kann von mir selbst gesetzten Kriterien für die Qualität meiner Texte erreichen. ] Um Ihnen die Beantwortung zu erleichtern, können Sie die Antwort in Prozent geben | .465                                                                                                                             | .464                                                                                                                                                        | .526                                                                                                                                              | .589                                                                                                                                                       | .588                                                                                                                              | 1,000                                                                                                                                                                     | .564                                                                                                                                                                    | .561                                                                                                                                                                 | .620                                                                                                                            | .620                                                                                                                               | .605                                                                                                                                                  | .394                                                                                                                                   | .548                                                                                                                            | .554                                                                                                                                 | .674                                                                                                                      | .535                                                                                                                                      | .517                                                                                                                                              | .518                                                                                                                                                        | .575                                                                                                                             | .353 | .584 | .433 | .518 | .554 | .655 | .587 | .505  | .480  |
| [ Ich kann von mir selbst gesetzten Teilziele beim Schreiben erreichen. ] Um Ihnen die Beantwortung zu erleichtern, können Sie die Antwort in Prozent geben                | .480                                                                                                                             | .509                                                                                                                                                        | .497                                                                                                                                              | .652                                                                                                                                                       | 1,000                                                                                                                             | .652                                                                                                                                                                      | .397                                                                                                                                                                    | .508                                                                                                                                                                 | .602                                                                                                                            | .614                                                                                                                               | .581                                                                                                                                                  | .416                                                                                                                                   | .466                                                                                                                            | .587                                                                                                                                 | .615                                                                                                                      | .504                                                                                                                                      | .440                                                                                                                                              | .369                                                                                                                                                        | .493                                                                                                                             | .406 | .440 | .433 | .510 | .484 | .587 | .505 | .489  | .480  |
| [ Ich kann ein gutes Gefühl für das Vorankommen beim Schreiben entwickeln. ] Um Ihnen die Beantwortung zu erleichtern, können Sie die Antwort in Prozent geben             | .472                                                                                                                             | .548                                                                                                                                                        | .640                                                                                                                                              | 1,000                                                                                                                                                      | .652                                                                                                                              | 1,000                                                                                                                                                                     | .498                                                                                                                                                                    | .454                                                                                                                                                                 | .566                                                                                                                            | .720                                                                                                                               | .616                                                                                                                                                  | .505                                                                                                                                   | .587                                                                                                                            | .596                                                                                                                                 | .589                                                                                                                      | .605                                                                                                                                      | .531                                                                                                                                              | .510                                                                                                                                                        | .484                                                                                                                             | .467 | .456 | .433 | .531 | .484 | .587 | .505 | .489  | .480  |
| [ Ich kann vermeiden, dass ich einen Fehler beim nächsten Mal wieder mache. ] Um Ihnen die Beantwortung zu erleichtern, können Sie die Antwort in Prozent geben            | .568                                                                                                                             | .657                                                                                                                                                        | 1,000                                                                                                                                             | .640                                                                                                                                                       | .497                                                                                                                              | .526                                                                                                                                                                      | .557                                                                                                                                                                    | .388                                                                                                                                                                 | .500                                                                                                                            | .560                                                                                                                               | .618                                                                                                                                                  | .489                                                                                                                                   | .505                                                                                                                            | .573                                                                                                                                 | .562                                                                                                                      | .461                                                                                                                                      | .418                                                                                                                                              | .479                                                                                                                                                        | .531                                                                                                                             | .265 | .431 | .433 | .418 | .531 | .573 | .505 | .489  | .480  |
| [ Ich kann mein Vorgehen bei Schreibprojekten durch Erfahrung verbessern. ] Um Ihnen die Beantwortung zu erleichtern, können Sie die Antwort in Prozent geben              | .573                                                                                                                             | 1,000                                                                                                                                                       | .657                                                                                                                                              | .546                                                                                                                                                       | .509                                                                                                                              | .464                                                                                                                                                                      | .454                                                                                                                                                                    | .339                                                                                                                                                                 | .389                                                                                                                            | .488                                                                                                                               | .530                                                                                                                                                  | .487                                                                                                                                   | .569                                                                                                                            | .562                                                                                                                                 | .524                                                                                                                      | .398                                                                                                                                      | .407                                                                                                                                              | .394                                                                                                                                                        | .408                                                                                                                             | .281 | .376 | .388 | .407 | .408 | .562 | .509 | 1,000 | .573  |
| [ Ich kann einschätzen, was ich beim nächsten Mal anders machen muss. ] Um Ihnen die Beantwortung zu erleichtern, können Sie die Antwort in Prozent geben                  | 1,000                                                                                                                            | .573                                                                                                                                                        | .588                                                                                                                                              | .472                                                                                                                                                       | .480                                                                                                                              | .465                                                                                                                                                                      | .426                                                                                                                                                                    | .336                                                                                                                                                                 | .439                                                                                                                            | .453                                                                                                                               | .539                                                                                                                                                  | .417                                                                                                                                   | .541                                                                                                                            | .485                                                                                                                                 | .540                                                                                                                      | .489                                                                                                                                      | .386                                                                                                                                              | .328                                                                                                                                                        | .376                                                                                                                             | .307 | .304 | .489 | .386 | .376 | .485 | .480 | .573  | 1,000 |

KMO- und Bartlett-Test

|                                                     |          |
|-----------------------------------------------------|----------|
| Maß der Stichprobeneignung nach Kaiser-Meyer-Olkin. | .927     |
| Bartlett-Test auf Sphärizität                       | 1689,459 |
| df                                                  | 231      |
| Signifikanz nach Bartlett                           | .000     |





Anti-Image-Matrizen

|                                                                                                                                  |                                                                                                                                                             |                                                                                                                                                   |                                                                                                                                                     |                                                                                                                                        |                                                                                                                                                            |                                                                                                                                   |                                                                                                                                                                       |                                                                                                                                                                         |                                                                                                                                                                    |                                                                                                                                                       |                                                                                                                                                       |                                                                                                                                        |                                                                                                                                                                |                                                                                                                                                  |                                                                                                                                                             |                                                                                                                                                                |                                                                                                                                                                 |                                                                                                                                                               |                                                                                                                                                           |
|----------------------------------------------------------------------------------------------------------------------------------|-------------------------------------------------------------------------------------------------------------------------------------------------------------|---------------------------------------------------------------------------------------------------------------------------------------------------|-----------------------------------------------------------------------------------------------------------------------------------------------------|----------------------------------------------------------------------------------------------------------------------------------------|------------------------------------------------------------------------------------------------------------------------------------------------------------|-----------------------------------------------------------------------------------------------------------------------------------|-----------------------------------------------------------------------------------------------------------------------------------------------------------------------|-------------------------------------------------------------------------------------------------------------------------------------------------------------------------|--------------------------------------------------------------------------------------------------------------------------------------------------------------------|-------------------------------------------------------------------------------------------------------------------------------------------------------|-------------------------------------------------------------------------------------------------------------------------------------------------------|----------------------------------------------------------------------------------------------------------------------------------------|----------------------------------------------------------------------------------------------------------------------------------------------------------------|--------------------------------------------------------------------------------------------------------------------------------------------------|-------------------------------------------------------------------------------------------------------------------------------------------------------------|----------------------------------------------------------------------------------------------------------------------------------------------------------------|-----------------------------------------------------------------------------------------------------------------------------------------------------------------|---------------------------------------------------------------------------------------------------------------------------------------------------------------|-----------------------------------------------------------------------------------------------------------------------------------------------------------|
| [ Ich kann mir konkrete Schreibziele setzen. ] Um Ihnen die Beantwortung zu erleichtern, können Sie die Antwort in Prozent geben | [ Ich kann meine Ideen auch bei einem komplexen Thema gut organisieren. ] Um Ihnen die Beantwortung zu erleichtern, können Sie die Antwort in Prozent geben | [ Ich kann mich dazu motivieren mit dem Schreiben anzufangen. ] Um Ihnen die Beantwortung zu erleichtern, können Sie die Antwort in Prozent geben | [ Ich kann Probleme, die beim Schreiben auftauchen, überwinden. ] Um Ihnen die Beantwortung zu erleichtern, können Sie die Antwort in Prozent geben | [ Ich kann Interesse für das Schreiben entwickeln. ] Um Ihnen die Beantwortung zu erleichtern, können Sie die Antwort in Prozent geben | [ Ich kann leicht Wege finden mein Interesse am Schreiben zu steigern. ] Um Ihnen die Beantwortung zu erleichtern, können Sie die Antwort in Prozent geben | [ Ich kann meine Schreibzeit effektiv nutzen. ] Um Ihnen die Beantwortung zu erleichtern, können Sie die Antwort in Prozent geben | [ Ich kann meine Zeit so einteilen, dass ich konzentriert an meinem Text arbeite. ] Um Ihnen die Beantwortung zu erleichtern, können Sie die Antwort in Prozent geben | [ Ich kann mir meinen Schreibplatz so gestalten, dass ich ungestört schreiben kann. ] Um Ihnen die Beantwortung zu erleichtern, können Sie die Antwort in Prozent geben | [ Ich kann beim Schreiben mein Vorgehen ändern, wenn es nicht erfolgreich ist. ] Um Ihnen die Beantwortung zu erleichtern, können Sie die Antwort in Prozent geben | [ Ich kann beim Schreiben nachvollziehen, was ich schreiben soll. ] Um Ihnen die Beantwortung zu erleichtern, können Sie die Antwort in Prozent geben | [ Ich kann eine Schreibblockade lösen und danach weiterschreiben. ] Um Ihnen die Beantwortung zu erleichtern, können Sie die Antwort in Prozent geben | [ Ich kann die Qualität meines Textes einschätzen. ] Um Ihnen die Beantwortung zu erleichtern, können Sie die Antwort in Prozent geben | [ Ich kann ein gutes Gefühl für das Schreiben beim Vorankommen entwickeln. ] Um Ihnen die Beantwortung zu erleichtern, können Sie die Antwort in Prozent geben | [ Ich kann die gesetzten Teilziele beim Schreiben erreichen. ] Um Ihnen die Beantwortung zu erleichtern, können Sie die Antwort in Prozent geben | [ Ich kann von mir selbst gesetzten Teilziele beim Schreiben erreichen. ] Um Ihnen die Beantwortung zu erleichtern, können Sie die Antwort in Prozent geben | [ Ich kann ein gutes Gefühl für das Schreiben beim Vorankommen entwickeln. ] Um Ihnen die Beantwortung zu erleichtern, können Sie die Antwort in Prozent geben | [ Ich kann vermeiden, dass ich einen Fehler beim nächsten Mal wieder mache. ] Um Ihnen die Beantwortung zu erleichtern, können Sie die Antwort in Prozent geben | [ Ich kann mein Vorgehen bei Schreibprojekten durch Erfahrung verbessern. ] Um Ihnen die Beantwortung zu erleichtern, können Sie die Antwort in Prozent geben | [ Ich kann einschätzen, was ich beim nächsten Mal anders machen muss. ] Um Ihnen die Beantwortung zu erleichtern, können Sie die Antwort in Prozent geben |
| -209                                                                                                                             | -088                                                                                                                                                        | ,158                                                                                                                                              | -1,116                                                                                                                                              | ,006                                                                                                                                   | -0,62                                                                                                                                                      | ,023                                                                                                                              | ,065                                                                                                                                                                  | -0,79                                                                                                                                                                   | -0,062                                                                                                                                                             | ,022                                                                                                                                                  | -0,10                                                                                                                                                 | ,142                                                                                                                                   | -0,275                                                                                                                                                         | ,080                                                                                                                                             | ,024                                                                                                                                                        | -1,112                                                                                                                                                         | ,080                                                                                                                                                            | ,055                                                                                                                                                          | -260                                                                                                                                                      |
| ,008                                                                                                                             | ,083                                                                                                                                                        | -1,174                                                                                                                                            | -0,072                                                                                                                                              | -1,194                                                                                                                                 | ,957 <sup>a</sup>                                                                                                                                          | -0,074                                                                                                                            | -1,164                                                                                                                                                                | -1,133                                                                                                                                                                  | ,120                                                                                                                                                               | -0,018                                                                                                                                                | ,100                                                                                                                                                  | -0,022                                                                                                                                 | ,078                                                                                                                                                           | -0,080                                                                                                                                           | -1,139                                                                                                                                                      | -0,278                                                                                                                                                         | -0,080                                                                                                                                                          | ,007                                                                                                                                                          | -1,01                                                                                                                                                     |
| -231                                                                                                                             | ,068                                                                                                                                                        | -0,048                                                                                                                                            | -0,088                                                                                                                                              | ,054                                                                                                                                   | ,964 <sup>a</sup>                                                                                                                                          | -0,303                                                                                                                            | -0,303                                                                                                                                                                | -0,079                                                                                                                                                                  | -0,127                                                                                                                                                             | ,177                                                                                                                                                  | ,001                                                                                                                                                  | -1,168                                                                                                                                 | -0,089                                                                                                                                                         | -0,072                                                                                                                                           | -0,004                                                                                                                                                      | -0,059                                                                                                                                                         | -0,072                                                                                                                                                          | -0,053                                                                                                                                                        | ,033                                                                                                                                                      |
| -054                                                                                                                             | -320                                                                                                                                                        | -1,130                                                                                                                                            | ,263                                                                                                                                                | ,227                                                                                                                                   | -1,190                                                                                                                                                     | ,892 <sup>a</sup>                                                                                                                 | -0,088                                                                                                                                                                | -0,088                                                                                                                                                                  | ,007                                                                                                                                                               | -0,344                                                                                                                                                | ,011                                                                                                                                                  | ,044                                                                                                                                   | ,139                                                                                                                                                           | ,098                                                                                                                                             | -1,134                                                                                                                                                      | ,139                                                                                                                                                           | ,098                                                                                                                                                            | -220                                                                                                                                                          | -1,136                                                                                                                                                    |
| ,122                                                                                                                             | -0,038                                                                                                                                                      | -0,025                                                                                                                                            | ,250                                                                                                                                                | -1,112                                                                                                                                 | -1,151                                                                                                                                                     | -0,098                                                                                                                            | -0,098                                                                                                                                                                | ,937 <sup>a</sup>                                                                                                                                                       | -0,078                                                                                                                                                             | -1,121                                                                                                                                                | -1,164                                                                                                                                                | ,006                                                                                                                                   | ,004                                                                                                                                                           | -0,099                                                                                                                                           | ,075                                                                                                                                                        | ,176                                                                                                                                                           | -0,099                                                                                                                                                          | -1,124                                                                                                                                                        | ,032                                                                                                                                                      |
| -006                                                                                                                             | -0,038                                                                                                                                                      | -0,023                                                                                                                                            | ,016                                                                                                                                                | -0,010                                                                                                                                 | ,038                                                                                                                                                       | ,007                                                                                                                              | -0,078                                                                                                                                                                | -0,078                                                                                                                                                                  | ,963 <sup>a</sup>                                                                                                                                                  | -0,099                                                                                                                                                | -0,310                                                                                                                                                | -1,173                                                                                                                                 | -0,032                                                                                                                                                         | -1,140                                                                                                                                           | -0,082                                                                                                                                                      | -0,059                                                                                                                                                         | -1,140                                                                                                                                                          | -0,013                                                                                                                                                        | -1,144                                                                                                                                                    |
| -026                                                                                                                             | ,239                                                                                                                                                        | ,217                                                                                                                                              | -0,318                                                                                                                                              | -1,112                                                                                                                                 | ,196                                                                                                                                                       | -0,344                                                                                                                            | -0,344                                                                                                                                                                | -1,121                                                                                                                                                                  | -0,099                                                                                                                                                             | ,889 <sup>a</sup>                                                                                                                                     | -1,116                                                                                                                                                | -1,182                                                                                                                                 | -0,437                                                                                                                                                         | ,044                                                                                                                                             | -0,079                                                                                                                                                      | -1,168                                                                                                                                                         | ,044                                                                                                                                                            | ,089                                                                                                                                                          | ,019                                                                                                                                                      |
| ,151                                                                                                                             | ,115                                                                                                                                                        | ,015                                                                                                                                              | -1,154                                                                                                                                              | -0,312                                                                                                                                 | ,072                                                                                                                                                       | -0,281                                                                                                                            | -0,281                                                                                                                                                                | -0,075                                                                                                                                                                  | ,024                                                                                                                                                               | ,148                                                                                                                                                  | -1,131                                                                                                                                                | -0,060                                                                                                                                 | -0,075                                                                                                                                                         | -0,046                                                                                                                                           | -1,186                                                                                                                                                      | -1,133                                                                                                                                                         | -0,046                                                                                                                                                          | ,205                                                                                                                                                          | ,007                                                                                                                                                      |
| -052                                                                                                                             | -0,038                                                                                                                                                      | -0,066                                                                                                                                            | -0,241                                                                                                                                              | ,019                                                                                                                                   | ,022                                                                                                                                                       | ,011                                                                                                                              | -0,164                                                                                                                                                                | -1,164                                                                                                                                                                  | -0,310                                                                                                                                                             | -1,116                                                                                                                                                | ,931 <sup>a</sup>                                                                                                                                     | ,163                                                                                                                                   | ,064                                                                                                                                                           | ,076                                                                                                                                             | -0,054                                                                                                                                                      | -1,171                                                                                                                                                         | ,076                                                                                                                                                            | ,029                                                                                                                                                          | ,039                                                                                                                                                      |
| -051                                                                                                                             | -0,326                                                                                                                                                      | ,151                                                                                                                                              | -0,017                                                                                                                                              | ,049                                                                                                                                   | ,197                                                                                                                                                       | ,044                                                                                                                              | -0,044                                                                                                                                                                | ,006                                                                                                                                                                    | -1,173                                                                                                                                                             | -1,182                                                                                                                                                | ,163                                                                                                                                                  | ,910 <sup>a</sup>                                                                                                                      | -0,074                                                                                                                                                         | -1,112                                                                                                                                           | ,142                                                                                                                                                        | -1,191                                                                                                                                                         | -1,112                                                                                                                                                          | -0,026                                                                                                                                                        | -1,109                                                                                                                                                    |
| ,146                                                                                                                             | -0,220                                                                                                                                                      | -0,046                                                                                                                                            | ,046                                                                                                                                                | -0,045                                                                                                                                 | -1,187                                                                                                                                                     | ,139                                                                                                                              | -0,046                                                                                                                                                                | ,176                                                                                                                                                                    | -0,059                                                                                                                                                             | -1,168                                                                                                                                                | -1,171                                                                                                                                                | -1,191                                                                                                                                 | ,060                                                                                                                                                           | ,043                                                                                                                                             | -0,065                                                                                                                                                      | ,941 <sup>a</sup>                                                                                                                                              | ,043                                                                                                                                                            | -0,053                                                                                                                                                        | ,006                                                                                                                                                      |
| -193                                                                                                                             | -0,016                                                                                                                                                      | ,020                                                                                                                                              | -0,054                                                                                                                                              | ,167                                                                                                                                   | -1,139                                                                                                                                                     | -1,134                                                                                                                            | -1,134                                                                                                                                                                | ,075                                                                                                                                                                    | -0,082                                                                                                                                                             | -0,079                                                                                                                                                | -0,054                                                                                                                                                | ,142                                                                                                                                   | -1,198                                                                                                                                                         | ,055                                                                                                                                             | ,960 <sup>a</sup>                                                                                                                                           | -0,085                                                                                                                                                         | ,055                                                                                                                                                            | -0,079                                                                                                                                                        | -0,059                                                                                                                                                    |
| -033                                                                                                                             | -0,053                                                                                                                                                      | -0,314                                                                                                                                            | ,201                                                                                                                                                | -0,042                                                                                                                                 | -1,197                                                                                                                                                     | ,139                                                                                                                              | -0,089                                                                                                                                                                | ,004                                                                                                                                                                    | -0,032                                                                                                                                                             | -0,437                                                                                                                                                | ,094                                                                                                                                                  | -0,074                                                                                                                                 | ,913 <sup>a</sup>                                                                                                                                              | -0,237                                                                                                                                           | -1,198                                                                                                                                                      | ,050                                                                                                                                                           | -0,237                                                                                                                                                          | -0,078                                                                                                                                                        | ,117                                                                                                                                                      |
| -006                                                                                                                             | -0,004                                                                                                                                                      | ,120                                                                                                                                              | -1,189                                                                                                                                              | -0,060                                                                                                                                 | -0,09                                                                                                                                                      | ,098                                                                                                                              | -0,072                                                                                                                                                                | -0,089                                                                                                                                                                  | -1,140                                                                                                                                                             | ,044                                                                                                                                                  | ,076                                                                                                                                                  | -1,112                                                                                                                                 | -0,237                                                                                                                                                         | ,055                                                                                                                                             | ,043                                                                                                                                                        | ,043                                                                                                                                                           | ,946 <sup>a</sup>                                                                                                                                               | -0,281                                                                                                                                                        | -216                                                                                                                                                      |

Anti-Image-Matrizen

|                                                                                                                                  |                                                                                                                                                             |                                                                                                                                               |                                                                                                                                                            |                                                                                                                                        |                                                                                                                                      |                                                                                                                                   |                                                                                                                                                                       |                                                                                                                                                                         |                                                                                                                                 |                                                                                                                                           |                                                                                                                                    |                                                                                                                                                       |                                                                                                                                        |                                                                                                                                                                                |                                                                                                                                                                 |                                                                                                                                                                |                                                                                                                                                                 |                                                                                                                                                 |                                                                                                                                                           |
|----------------------------------------------------------------------------------------------------------------------------------|-------------------------------------------------------------------------------------------------------------------------------------------------------------|-----------------------------------------------------------------------------------------------------------------------------------------------|------------------------------------------------------------------------------------------------------------------------------------------------------------|----------------------------------------------------------------------------------------------------------------------------------------|--------------------------------------------------------------------------------------------------------------------------------------|-----------------------------------------------------------------------------------------------------------------------------------|-----------------------------------------------------------------------------------------------------------------------------------------------------------------------|-------------------------------------------------------------------------------------------------------------------------------------------------------------------------|---------------------------------------------------------------------------------------------------------------------------------|-------------------------------------------------------------------------------------------------------------------------------------------|------------------------------------------------------------------------------------------------------------------------------------|-------------------------------------------------------------------------------------------------------------------------------------------------------|----------------------------------------------------------------------------------------------------------------------------------------|--------------------------------------------------------------------------------------------------------------------------------------------------------------------------------|-----------------------------------------------------------------------------------------------------------------------------------------------------------------|----------------------------------------------------------------------------------------------------------------------------------------------------------------|-----------------------------------------------------------------------------------------------------------------------------------------------------------------|-------------------------------------------------------------------------------------------------------------------------------------------------|-----------------------------------------------------------------------------------------------------------------------------------------------------------|
| [ Ich kann mir konkrete Schreibziele setzen. ] Um Ihnen die Beantwortung zu erleichtern, können Sie die Antwort in Prozent geben | [ Ich kann meine Ideen auch bei einem komplexen Thema gut organisieren. ] Um Ihnen die Beantwortung zu erleichtern, können Sie die Antwort in Prozent geben | [ Ich kann mich dazu motivieren dem Schreiben anzufangen. ] Um Ihnen die Beantwortung zu erleichtern, können Sie die Antwort in Prozent geben | [ Ich kann leicht Wege finden mein Interesse am Schreiben zu steigern. ] Um Ihnen die Beantwortung zu erleichtern, können Sie die Antwort in Prozent geben | [ Ich kann beim Vorgehen mein Vorgehen überwinden. ] Um Ihnen die Beantwortung zu erleichtern, können Sie die Antwort in Prozent geben | [ Ich kann mich auf das Schreiben konzentrieren. ] Um Ihnen die Beantwortung zu erleichtern, können Sie die Antwort in Prozent geben | [ Ich kann meine Schreibzeit effektiv nutzen. ] Um Ihnen die Beantwortung zu erleichtern, können Sie die Antwort in Prozent geben | [ Ich kann meine Zeit so einteilen, dass ich konzentriert an meinem Text arbeite. ] Um Ihnen die Beantwortung zu erleichtern, können Sie die Antwort in Prozent geben | [ Ich kann mir meinen Schreibplatz so gestalten, dass ich ungestört schreiben kann. ] Um Ihnen die Beantwortung zu erleichtern, können Sie die Antwort in Prozent geben | [ Ich kann beim Schreiben erfolgreich sein. ] Um Ihnen die Beantwortung zu erleichtern, können Sie die Antwort in Prozent geben | [ Ich kann beim Schreiben Vorankommen nachvollziehen. ] Um Ihnen die Beantwortung zu erleichtern, können Sie die Antwort in Prozent geben | [ Ich kann ausdauernd an meinem Text arbeiten. ] Um Ihnen die Beantwortung zu erleichtern, können Sie die Antwort in Prozent geben | [ Ich kann eine Schreibblockade lösen und danach weiterschreiben. ] Um Ihnen die Beantwortung zu erleichtern, können Sie die Antwort in Prozent geben | [ Ich kann die Qualität meines Textes einschätzen. ] Um Ihnen die Beantwortung zu erleichtern, können Sie die Antwort in Prozent geben | [ Ich kann die von mir selbst gesetzten Kriterien für die Qualität meiner Texte erreichen. ] Um Ihnen die Beantwortung zu erleichtern, können Sie die Antwort in Prozent geben | [ Ich kann die von mir selbst gesetzten Teilziele beim Schreiben erreichen. ] Um Ihnen die Beantwortung zu erleichtern, können Sie die Antwort in Prozent geben | [ Ich kann ein gutes Gefühl für das Vorankommen beim Schreiben entwickeln. ] Um Ihnen die Beantwortung zu erleichtern, können Sie die Antwort in Prozent geben | [ Ich kann vermeiden, dass ich einen Fehler beim nächsten Mal wieder mache. ] Um Ihnen die Beantwortung zu erleichtern, können Sie die Antwort in Prozent geben | [ Ich kann bei Schreibprojekten meine Erfahrung verbessern. ] Um Ihnen die Beantwortung zu erleichtern, können Sie die Antwort in Prozent geben | [ Ich kann einschätzen, was ich beim nächsten Mal anders machen muss. ] Um Ihnen die Beantwortung zu erleichtern, können Sie die Antwort in Prozent geben |
| -0,056                                                                                                                           | ,079                                                                                                                                                        | ,072                                                                                                                                          | ,015                                                                                                                                                       | ,055                                                                                                                                   | ,007                                                                                                                                 | -,053                                                                                                                             | -,124                                                                                                                                                                 | -,013                                                                                                                                                                   | ,089                                                                                                                            | ,205                                                                                                                                      | ,029                                                                                                                               | -,026                                                                                                                                                 | -,053                                                                                                                                  | -,079                                                                                                                                                                          | -,078                                                                                                                                                           | -,281                                                                                                                                                          | -,944 <sup>a</sup>                                                                                                                                              | -,188                                                                                                                                           |                                                                                                                                                           |
| ,138                                                                                                                             | ,148                                                                                                                                                        | -,083                                                                                                                                         | -,073                                                                                                                                                      | -,260                                                                                                                                  | -,101                                                                                                                                | ,033                                                                                                                              | ,032                                                                                                                                                                  | -,144                                                                                                                                                                   | ,019                                                                                                                            | ,007                                                                                                                                      | ,039                                                                                                                               | -,109                                                                                                                                                 | ,006                                                                                                                                   | -,059                                                                                                                                                                          | ,117                                                                                                                                                            | -,216                                                                                                                                                          | -,188                                                                                                                                                           | ,936 <sup>b</sup>                                                                                                                               |                                                                                                                                                           |

a. Maß der Stichprobeneignung

Kommunalitäten

|                                                                                                                                                             | Anfänglich | Extraktion |
|-------------------------------------------------------------------------------------------------------------------------------------------------------------|------------|------------|
| [ Ich kann mir konkrete Schreibziele setzen. ] Um Ihnen die Beantwortung zu erleichtern, können Sie die Antwort in Prozent geben                            | ,454       | ,331       |
| [ Ich kann meine Ideen auch bei einem komplexen Thema gut organisieren. ] Um Ihnen die Beantwortung zu erleichtern, können Sie die Antwort in Prozent geben | ,569       | ,386       |
| [ Ich kann mich dazu motivieren dem Schreiben anzufangen. ] Um Ihnen die Beantwortung zu erleichtern, können Sie die Antwort in Prozent geben               | ,449       | ,231       |
| [ Ich kann meine Ideen auch bei einem komplexen Thema gut organisieren. ] Um Ihnen die Beantwortung zu erleichtern, können Sie die Antwort in Prozent geben | ,608       | ,442       |

**Kommunalitäten**

|                                                                                                                                                                                                           | Anfänglich | Extraktion |
|-----------------------------------------------------------------------------------------------------------------------------------------------------------------------------------------------------------|------------|------------|
| <input type="checkbox"/> Ich kann Interesse für das Schreiben entwickeln. ] Um Ihnen die Beantwortung zu erleichtern, können Sie die Antwort in Prozent geben                                             | ,538       | ,377       |
| <input type="checkbox"/> Ich kann leicht Wege finden mein Interesse am Schreiben zu steigern. ] Um Ihnen die Beantwortung zu erleichtern, können Sie die Antwort in Prozent geben                         | ,556       | ,385       |
| <input type="checkbox"/> Ich kann mein Vorgehen beim Schreiben überwachen. ] Um Ihnen die Beantwortung zu erleichtern, können Sie die Antwort in Prozent geben                                            | ,518       | ,436       |
| <input type="checkbox"/> Ich kann mich auf das Schreiben konzentrieren. ] Um Ihnen die Beantwortung zu erleichtern, können Sie die Antwort in Prozent geben                                               | ,680       | ,621       |
| <input type="checkbox"/> Ich kann meine Schreibzeit effektiv nutzen. ] Um Ihnen die Beantwortung zu erleichtern, können Sie die Antwort in Prozent geben                                                  | ,651       | ,583       |
| <input type="checkbox"/> Ich kann mir meine Zeit so einteilen, dass ich konzentriert an meinem Text arbeite. ] Um Ihnen die Beantwortung zu erleichtern, können Sie die Antwort in Prozent geben          | ,759       | ,608       |
| <input type="checkbox"/> Ich kann mir meinen Schreibplatz so gestalten, dass ich ungestört schreiben kann. ] Um Ihnen die Beantwortung zu erleichtern, können Sie die Antwort in Prozent geben            | ,504       | ,386       |
| <input type="checkbox"/> Ich kann mein Vorgehen beim Schreiben ändern, wenn ich merke, dass es nicht erfolgreich ist. ] Um Ihnen die Beantwortung zu erleichtern, können Sie die Antwort in Prozent geben | ,659       | ,600       |



**Kommunalitäten**

|                                                                                                                                                                                | Anfänglich | Extraktion |
|--------------------------------------------------------------------------------------------------------------------------------------------------------------------------------|------------|------------|
| [ Ich kann mein Vorankommen beim Schreiben nachvollziehen. ]<br>Um Ihnen die Beantwortung zu erleichtern, können Sie die Antwort in Prozent geben                              | ,731       | ,585       |
| [ Ich kann ausdauernd an meinem Text arbeiten. ] Um Ihnen die Beantwortung zu erleichtern, können Sie die Antwort in Prozent geben                                             | ,638       | ,546       |
| [ Ich kann eine Schreibblockade lösen und danach weiterschreiben. ] Um Ihnen die Beantwortung zu erleichtern, können Sie die Antwort in Prozent geben                          | ,553       | ,404       |
| [ Ich kann die Qualität meines Textes realistisch einschätzen. ] Um Ihnen die Beantwortung zu erleichtern, können Sie die Antwort in Prozent geben                             | ,606       | ,384       |
| [ Ich kann die von mir selbst gesetzten Kriterien für die Qualität meiner Texte erreichen. ] Um Ihnen die Beantwortung zu erleichtern, können Sie die Antwort in Prozent geben | ,690       | ,611       |
| [ Ich kann die von mir selbst gesetzten Teilziele beim Schreiben erreichen. ] Um Ihnen die Beantwortung zu erleichtern, können Sie die Antwort in Prozent geben                | ,634       | ,574       |
| [ Ich kann ein gutes Gefühl für das Vorankommen beim Schreiben entwickeln. ] Um Ihnen die Beantwortung zu erleichtern, können Sie die Antwort in Prozent geben                 | ,746       | ,653       |
| [ Ich kann vermeiden, dass ich einen Fehler beim nächsten Mal wieder mache. ] Um Ihnen die Beantwortung zu erleichtern, können Sie die Antwort in Prozent geben                | ,655       | ,546       |

**Kommunalitäten**

|                                                                                                                                                               | Anfänglich | Extraktion |
|---------------------------------------------------------------------------------------------------------------------------------------------------------------|------------|------------|
| [ Ich kann mein Vorgehen bei Schreibprojekten durch Erfahrung verbessern. ] Um Ihnen die Beantwortung zu erleichtern, können Sie die Antwort in Prozent geben | ,577       | ,458       |
| [ Ich kann einschätzen, was ich beim nächsten Mal anders machen muss. ] Um Ihnen die Beantwortung zu erleichtern, können Sie die Antwort in Prozent geben     | ,533       | ,408       |

Extraktionsmethode: Hauptachsen-Faktorenanalyse.

**Erklärte Gesamtvarianz**

| Faktor | Anfängliche Eigenwerte |               | Summen von quadrierten Faktorladungen für Extraktion |               |
|--------|------------------------|---------------|------------------------------------------------------|---------------|
|        | Gesamt                 | % der Varianz | Gesamt                                               | % der Varianz |
| 1      | 11,052                 | 50,236        | 10,558                                               | 47,989        |
| 2      | 1,304                  | 5,926         |                                                      |               |
| 3      | 1,124                  | 5,110         |                                                      |               |
| 4      | ,911                   | 4,142         |                                                      |               |
| 5      | ,825                   | 3,748         |                                                      |               |
| 6      | ,774                   | 3,518         |                                                      |               |
| 7      | ,687                   | 3,123         |                                                      |               |
| 8      | ,631                   | 2,870         |                                                      |               |
| 9      | ,609                   | 2,768         |                                                      |               |
| 10     | ,528                   | 2,401         |                                                      |               |
| 11     | ,487                   | 2,213         |                                                      |               |
| 12     | ,405                   | 1,839         |                                                      |               |
| 13     | ,387                   | 1,759         |                                                      |               |
| 14     | ,354                   | 1,609         |                                                      |               |
| 15     | ,327                   | 1,485         |                                                      |               |
| 16     | ,316                   | 1,435         |                                                      |               |
| 17     | ,275                   | 1,252         |                                                      |               |
| 18     | ,259                   | 1,178         |                                                      |               |
| 19     | ,237                   | 1,079         |                                                      |               |
| 20     | ,214                   | ,973          |                                                      |               |
| 21     | ,175                   | ,798          |                                                      |               |
| 22     | ,118                   | ,536          |                                                      |               |
|        |                        | 100,000       |                                                      |               |

Extraktionsmethode: Hauptachsen-Faktorenanalyse.

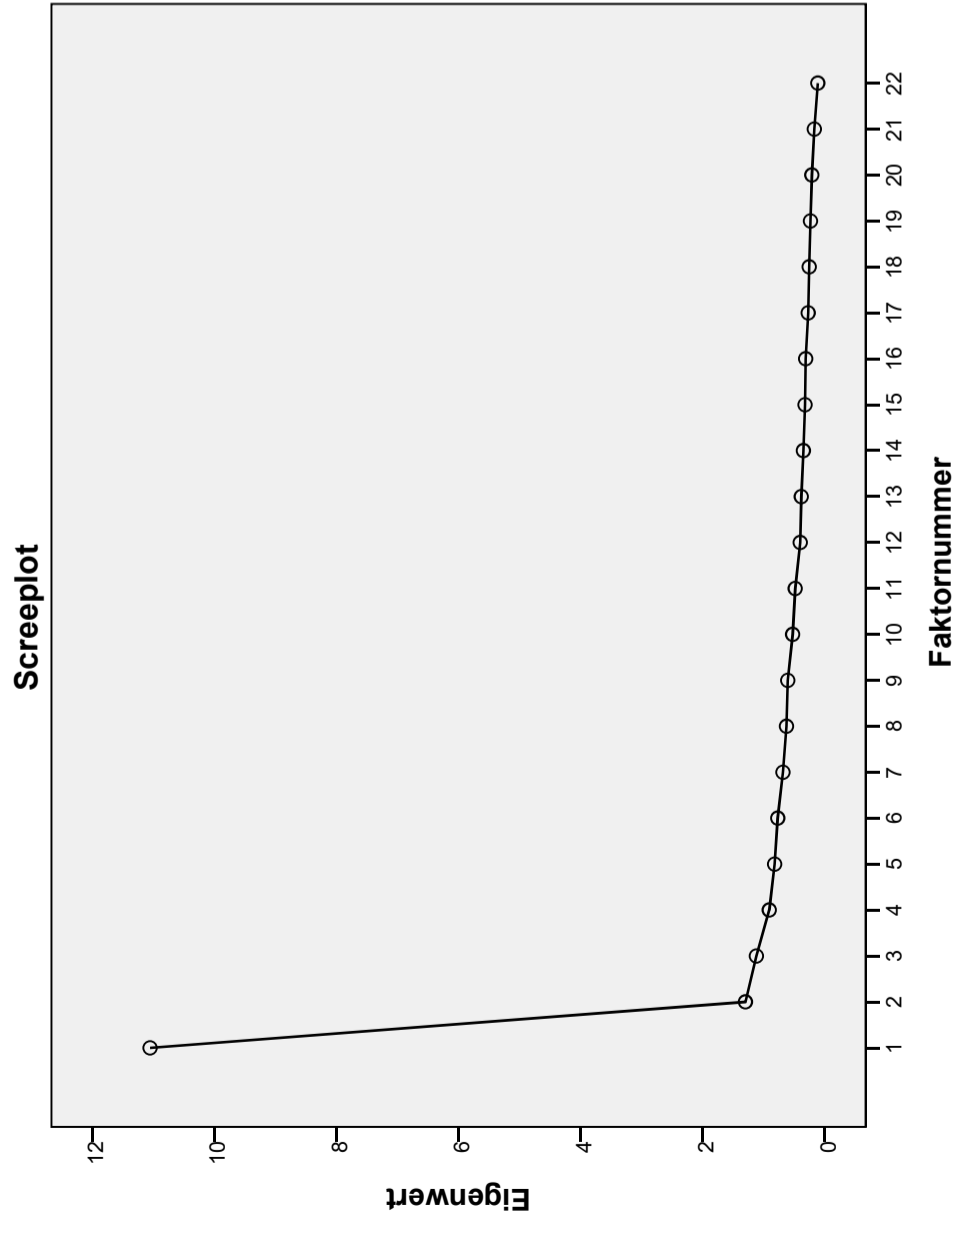

Faktorenmatrix<sup>a</sup>

|                                                                                                                                                                    | Faktor<br>1 |
|--------------------------------------------------------------------------------------------------------------------------------------------------------------------|-------------|
| <p>[ Ich kann mir konkrete Schreibziele setzen. ] Um Ihnen die Beantwortung zu erleichtern, können Sie die Antwort in Prozent geben</p>                            | ,575        |
| <p>[ Ich kann meine Ideen auch bei einem komplexen Thema gut organisieren. ] Um Ihnen die Beantwortung zu erleichtern, können Sie die Antwort in Prozent geben</p> | ,621        |
| <p>[ Ich kann mich dazu motivieren mit dem Schreiben anzufangen. ] Um Ihnen die Beantwortung zu erleichtern, können Sie die Antwort in Prozent geben</p>           | ,481        |
| <p>[ Ich kann Probleme, die beim Schreiben auftauchen, überwinden. ] Um Ihnen die Beantwortung zu erleichtern, können Sie die Antwort in Prozent geben</p>         | ,665        |
| <p>[ Ich kann Interesse für das Schreiben entwickeln. ] Um Ihnen die Beantwortung zu erleichtern, können Sie die Antwort in Prozent geben</p>                      | ,614        |
| <p>[ Ich kann leicht Wege finden mein Interesse am Schreiben zu steigern. ] Um Ihnen die Beantwortung zu erleichtern, können Sie die Antwort in Prozent geben</p>  | ,621        |
| <p>[ Ich kann mein Vorgehen beim Schreiben überwachen. ] Um Ihnen die Beantwortung zu erleichtern, können Sie die Antwort in Prozent geben</p>                     | ,661        |
| <p>[ Ich kann mich auf das Schreiben konzentrieren. ] Um Ihnen die Beantwortung zu erleichtern, können Sie die Antwort in Prozent geben</p>                        | ,788        |

**Faktorenmatrix<sup>a</sup>**

|                                                                                                                                                                                    | Faktor<br>1 |
|------------------------------------------------------------------------------------------------------------------------------------------------------------------------------------|-------------|
| [ Ich kann meine Schreibzeit effektiv nutzen. ] Um Ihnen die Beantwortung zu erleichtern, können Sie die Antwort in Prozent geben                                                  | ,763        |
| [ Ich kann mir meine Zeit so einteilen, dass ich konzentriert an meinem Text arbeite. ] Um Ihnen die Beantwortung zu erleichtern, können Sie die Antwort in Prozent geben          | ,780        |
| [ Ich kann mir meinen Schreibplatz so gestalten, dass ich ungestört schreiben kann. ] Um Ihnen die Beantwortung zu erleichtern, können Sie die Antwort in Prozent geben            | ,622        |
| [ Ich kann mein Vorgehen beim Schreiben ändern, wenn ich merke, dass es nicht erfolgreich ist. ] Um Ihnen die Beantwortung zu erleichtern, können Sie die Antwort in Prozent geben | ,775        |
| [ Ich kann mein Vorankommen beim Schreiben nachvollziehen. ] Um Ihnen die Beantwortung zu erleichtern, können Sie die Antwort in Prozent geben                                     | ,765        |
| [ Ich kann ausdauernd an meinem Text arbeiten. ] Um Ihnen die Beantwortung zu erleichtern, können Sie die Antwort in Prozent geben                                                 | ,739        |
| [ Ich kann eine Schreibblockade lösen und danach weiterschreiben. ] Um Ihnen die Beantwortung zu erleichtern, können Sie die Antwort in Prozent geben                              | ,636        |
| [ Ich kann die Qualität meines Textes realistisch einschätzen. ] Um Ihnen die Beantwortung zu erleichtern, können Sie die Antwort in Prozent geben                                 | ,620        |

**Faktorenmatrix<sup>a</sup>**

|                                                                                                                                                                                | Faktor<br>1 |
|--------------------------------------------------------------------------------------------------------------------------------------------------------------------------------|-------------|
| [ Ich kann die von mir selbst gesetzten Kriterien für die Qualität meiner Texte erreichen. ] Um Ihnen die Beantwortung zu erleichtern, können Sie die Antwort in Prozent geben | ,782        |
| [ Ich kann die von mir selbst gesetzten Teilziele beim Schreiben erreichen. ] Um Ihnen die Beantwortung zu erleichtern, können Sie die Antwort in Prozent geben                | ,758        |
| [ Ich kann ein gutes Gefühl für das Vorankommen beim Schreiben entwickeln. ] Um Ihnen die Beantwortung zu erleichtern, können Sie die Antwort in Prozent geben                 | ,808        |
| [ Ich kann vermeiden, dass ich einen Fehler beim nächsten Mal wieder mache. ] Um Ihnen die Beantwortung zu erleichtern, können Sie die Antwort in Prozent geben                | ,739        |
| [ Ich kann mein Vorgehen bei Schreibprojekten durch Erfahrung verbessern. ] Um Ihnen die Beantwortung zu erleichtern, können Sie die Antwort in Prozent geben                  | ,677        |
| [ Ich kann einschätzen, was ich beim nächsten Mal anders machen muss. ] Um Ihnen die Beantwortung zu erleichtern, können Sie die Antwort in Prozent geben                      | ,639        |

Extraktionsmethode:

Hauptachsenfaktorenanalyse.

a. 1 Faktoren extrahiert. Es werden 3 Iterationen benötigt.

Reproduzierte Korrelationen

| [ Ich kann mir konkrete Schreibziele setzen. ] Um Ihnen die Beantwortung zu erleichtern, können Sie die Antwort in Prozent geben | [ Ich kann meine Ideen auch bei einem komplexen Thema gut organisieren. ] Um Ihnen die Beantwortung zu erleichtern, können Sie die Antwort in Prozent geben | [ Ich kann mich dazu motivieren mit dem Schreiben anzufangen. ] Um Ihnen die Beantwortung zu erleichtern, können Sie die Antwort in Prozent geben | [ Ich kann leicht Wege finden mein Interesse am Schreiben zu steigern. ] Um Ihnen die Beantwortung zu erleichtern, können Sie die Antwort in Prozent geben | [ Ich kann mich auf das Schreiben konzentrieren. ] Um Ihnen die Beantwortung zu erleichtern, können Sie die Antwort in Prozent geben | [ Ich kann meine Schreibzeit effektiv nutzen. ] Um Ihnen die Beantwortung zu erleichtern, können Sie die Antwort in Prozent geben | [ Ich kann mir meine Zeit so einteilen, dass ich konzentriert an meiner Text arbeite. ] Um Ihnen die Beantwortung zu erleichtern, können Sie die Antwort in Prozent geben | [ Ich kann meinen Schreibplatz so gestalten, dass ich ungestört schreiben kann. ] Um Ihnen die Beantwortung zu erleichtern, können Sie die Antwort in Prozent geben | [ Ich kann beim Schreiben erfolgreich sein. ] Um Ihnen die Beantwortung zu erleichtern, können Sie die Antwort in Prozent geben | [ Ich kann mein Vorankommen beim Schreiben nachvollziehen. ] Um Ihnen die Beantwortung zu erleichtern, können Sie die Antwort in Prozent geben | [ Ich kann mein Text ausdauernd an arbeiten. ] Um Ihnen die Beantwortung zu erleichtern, können Sie die Antwort in Prozent geben | [ Ich kann eine Schreibblockade lösen und danach weiterschreiben. ] Um Ihnen die Beantwortung zu erleichtern, können Sie die Antwort in Prozent geben | [ Ich kann die Qualität meines Textes realistisch einschätzen. ] Um Ihnen die Beantwortung zu erleichtern, können Sie die Antwort in Prozent geben | [ Ich kann die von mir selbst gesetzten Kriterien für die Qualität meiner Texte erreichen. ] Um Ihnen die Beantwortung zu erleichtern, können Sie die Antwort in Prozent geben | [ Ich kann die von mir selbst gesetzten Teilziele beim Schreiben erreichen. ] Um Ihnen die Beantwortung zu erleichtern, können Sie die Antwort in Prozent geben | [ Ich kann ein gutes Gefühl für das Vorankommen beim Schreiben entwickeln. ] Um Ihnen die Beantwortung zu erleichtern, können Sie die Antwort in Prozent geben | [ Ich kann vermeiden, dass ich einen Fehler beim nächsten Mal wieder mache. ] Um Ihnen die Beantwortung zu erleichtern, können Sie die Antwort in Prozent geben | [ Ich kann mein Vorgehen bei Schreibprojekten durch Erfahrung verbessern. ] Um Ihnen die Beantwortung zu erleichtern, können Sie die Antwort in Prozent geben | [ Ich kann einschätzen, was ich beim nächsten Mal anders machen muss. ] Um Ihnen die Beantwortung zu erleichtern, können Sie die Antwort in Prozent geben |
|----------------------------------------------------------------------------------------------------------------------------------|-------------------------------------------------------------------------------------------------------------------------------------------------------------|---------------------------------------------------------------------------------------------------------------------------------------------------|------------------------------------------------------------------------------------------------------------------------------------------------------------|--------------------------------------------------------------------------------------------------------------------------------------|-----------------------------------------------------------------------------------------------------------------------------------|---------------------------------------------------------------------------------------------------------------------------------------------------------------------------|---------------------------------------------------------------------------------------------------------------------------------------------------------------------|---------------------------------------------------------------------------------------------------------------------------------|------------------------------------------------------------------------------------------------------------------------------------------------|----------------------------------------------------------------------------------------------------------------------------------|-------------------------------------------------------------------------------------------------------------------------------------------------------|----------------------------------------------------------------------------------------------------------------------------------------------------|--------------------------------------------------------------------------------------------------------------------------------------------------------------------------------|-----------------------------------------------------------------------------------------------------------------------------------------------------------------|----------------------------------------------------------------------------------------------------------------------------------------------------------------|-----------------------------------------------------------------------------------------------------------------------------------------------------------------|---------------------------------------------------------------------------------------------------------------------------------------------------------------|-----------------------------------------------------------------------------------------------------------------------------------------------------------|
| [ Ich kann mir konkrete Schreibziele setzen. ] Um Ihnen die Beantwortung zu erleichtern, können Sie die Antwort in Prozent geben | [ Ich kann meine Ideen auch bei einem komplexen Thema gut organisieren. ] Um Ihnen die Beantwortung zu erleichtern, können Sie die Antwort in Prozent geben | [ Ich kann mich dazu motivieren mit dem Schreiben anzufangen. ] Um Ihnen die Beantwortung zu erleichtern, können Sie die Antwort in Prozent geben | [ Ich kann leicht Wege finden mein Interesse am Schreiben zu steigern. ] Um Ihnen die Beantwortung zu erleichtern, können Sie die Antwort in Prozent geben | [ Ich kann mich auf das Schreiben konzentrieren. ] Um Ihnen die Beantwortung zu erleichtern, können Sie die Antwort in Prozent geben | [ Ich kann meine Schreibzeit effektiv nutzen. ] Um Ihnen die Beantwortung zu erleichtern, können Sie die Antwort in Prozent geben | [ Ich kann mir meine Zeit so einteilen, dass ich konzentriert an meiner Text arbeite. ] Um Ihnen die Beantwortung zu erleichtern, können Sie die Antwort in Prozent geben | [ Ich kann meinen Schreibplatz so gestalten, dass ich ungestört schreiben kann. ] Um Ihnen die Beantwortung zu erleichtern, können Sie die Antwort in Prozent geben | [ Ich kann beim Schreiben erfolgreich sein. ] Um Ihnen die Beantwortung zu erleichtern, können Sie die Antwort in Prozent geben | [ Ich kann mein Vorankommen beim Schreiben nachvollziehen. ] Um Ihnen die Beantwortung zu erleichtern, können Sie die Antwort in Prozent geben | [ Ich kann mein Text ausdauernd an arbeiten. ] Um Ihnen die Beantwortung zu erleichtern, können Sie die Antwort in Prozent geben | [ Ich kann eine Schreibblockade lösen und danach weiterschreiben. ] Um Ihnen die Beantwortung zu erleichtern, können Sie die Antwort in Prozent geben | [ Ich kann die Qualität meines Textes realistisch einschätzen. ] Um Ihnen die Beantwortung zu erleichtern, können Sie die Antwort in Prozent geben | [ Ich kann die von mir selbst gesetzten Kriterien für die Qualität meiner Texte erreichen. ] Um Ihnen die Beantwortung zu erleichtern, können Sie die Antwort in Prozent geben | [ Ich kann die von mir selbst gesetzten Teilziele beim Schreiben erreichen. ] Um Ihnen die Beantwortung zu erleichtern, können Sie die Antwort in Prozent geben | [ Ich kann ein gutes Gefühl für das Vorankommen beim Schreiben entwickeln. ] Um Ihnen die Beantwortung zu erleichtern, können Sie die Antwort in Prozent geben | [ Ich kann vermeiden, dass ich einen Fehler beim nächsten Mal wieder mache. ] Um Ihnen die Beantwortung zu erleichtern, können Sie die Antwort in Prozent geben | [ Ich kann mein Vorgehen bei Schreibprojekten durch Erfahrung verbessern. ] Um Ihnen die Beantwortung zu erleichtern, können Sie die Antwort in Prozent geben | [ Ich kann einschätzen, was ich beim nächsten Mal anders machen muss. ] Um Ihnen die Beantwortung zu erleichtern, können Sie die Antwort in Prozent geben |
| ,331 <sup>a</sup>                                                                                                                | ,358                                                                                                                                                        | ,277                                                                                                                                              | ,353                                                                                                                                                       | ,380                                                                                                                                 | ,439                                                                                                                              | ,449                                                                                                                                                                      | ,358                                                                                                                                                                | ,446                                                                                                                            | ,440                                                                                                                                           | ,425                                                                                                                             | ,366                                                                                                                                                  | ,357                                                                                                                                               | ,450                                                                                                                                                                           | ,436                                                                                                                                                            | ,465                                                                                                                                                           | ,425                                                                                                                                                            | ,390                                                                                                                                                          | ,368                                                                                                                                                      |
| ,358                                                                                                                             | ,386 <sup>a</sup>                                                                                                                                           | ,299                                                                                                                                              | ,382                                                                                                                                                       | ,410                                                                                                                                 | ,474                                                                                                                              | ,484                                                                                                                                                                      | ,386                                                                                                                                                                | ,481                                                                                                                            | ,475                                                                                                                                           | ,459                                                                                                                             | ,395                                                                                                                                                  | ,385                                                                                                                                               | ,486                                                                                                                                                                           | ,471                                                                                                                                                            | ,502                                                                                                                                                           | ,459                                                                                                                                                            | ,421                                                                                                                                                          | ,397                                                                                                                                                      |
| ,277                                                                                                                             | ,299                                                                                                                                                        | ,231 <sup>a</sup>                                                                                                                                 | ,295                                                                                                                                                       | ,318                                                                                                                                 | ,367                                                                                                                              | ,375                                                                                                                                                                      | ,299                                                                                                                                                                | ,373                                                                                                                            | ,368                                                                                                                                           | ,355                                                                                                                             | ,306                                                                                                                                                  | ,298                                                                                                                                               | ,376                                                                                                                                                                           | ,365                                                                                                                                                            | ,389                                                                                                                                                           | ,356                                                                                                                                                            | ,326                                                                                                                                                          | ,307                                                                                                                                                      |
| ,383                                                                                                                             | ,413                                                                                                                                                        | ,320                                                                                                                                              | ,408                                                                                                                                                       | ,439                                                                                                                                 | ,508                                                                                                                              | ,518                                                                                                                                                                      | ,413                                                                                                                                                                | ,515                                                                                                                            | ,509                                                                                                                                           | ,491                                                                                                                             | ,423                                                                                                                                                  | ,412                                                                                                                                               | ,520                                                                                                                                                                           | ,504                                                                                                                                                            | ,537                                                                                                                                                           | ,491                                                                                                                                                            | ,450                                                                                                                                                          | ,425                                                                                                                                                      |
| ,353                                                                                                                             | ,408                                                                                                                                                        | ,377 <sup>a</sup>                                                                                                                                 | ,381                                                                                                                                                       | ,406                                                                                                                                 | ,469                                                                                                                              | ,479                                                                                                                                                                      | ,382                                                                                                                                                                | ,476                                                                                                                            | ,470                                                                                                                                           | ,454                                                                                                                             | ,390                                                                                                                                                  | ,381                                                                                                                                               | ,480                                                                                                                                                                           | ,465                                                                                                                                                            | ,496                                                                                                                                                           | ,454                                                                                                                                                            | ,416                                                                                                                                                          | ,392                                                                                                                                                      |
| ,357                                                                                                                             | ,413                                                                                                                                                        | ,299                                                                                                                                              | ,381                                                                                                                                                       | ,410                                                                                                                                 | ,474                                                                                                                              | ,484                                                                                                                                                                      | ,386                                                                                                                                                                | ,481                                                                                                                            | ,475                                                                                                                                           | ,458                                                                                                                             | ,395                                                                                                                                                  | ,385                                                                                                                                               | ,485                                                                                                                                                                           | ,470                                                                                                                                                            | ,501                                                                                                                                                           | ,459                                                                                                                                                            | ,420                                                                                                                                                          | ,397                                                                                                                                                      |
| ,380                                                                                                                             | ,410                                                                                                                                                        | ,318                                                                                                                                              | ,406                                                                                                                                                       | ,436 <sup>a</sup>                                                                                                                    | ,504                                                                                                                              | ,515                                                                                                                                                                      | ,411                                                                                                                                                                | ,512                                                                                                                            | ,505                                                                                                                                           | ,488                                                                                                                             | ,420                                                                                                                                                  | ,409                                                                                                                                               | ,516                                                                                                                                                                           | ,501                                                                                                                                                            | ,534                                                                                                                                                           | ,488                                                                                                                                                            | ,447                                                                                                                                                          | ,422                                                                                                                                                      |
| ,454                                                                                                                             | ,490                                                                                                                                                        | ,379                                                                                                                                              | ,484                                                                                                                                                       | ,521                                                                                                                                 | ,602                                                                                                                              | ,615                                                                                                                                                                      | ,490                                                                                                                                                                | ,611                                                                                                                            | ,603                                                                                                                                           | ,562                                                                                                                             | ,501                                                                                                                                                  | ,488                                                                                                                                               | ,616                                                                                                                                                                           | ,597                                                                                                                                                            | ,637                                                                                                                                                           | ,563                                                                                                                                                            | ,534                                                                                                                                                          | ,504                                                                                                                                                      |
| ,439                                                                                                                             | ,474                                                                                                                                                        | ,367                                                                                                                                              | ,469                                                                                                                                                       | ,504                                                                                                                                 | ,583 <sup>a</sup>                                                                                                                 | ,595                                                                                                                                                                      | ,475                                                                                                                                                                | ,591                                                                                                                            | ,584                                                                                                                                           | ,564                                                                                                                             | ,485                                                                                                                                                  | ,473                                                                                                                                               | ,597                                                                                                                                                                           | ,579                                                                                                                                                            | ,617                                                                                                                                                           | ,564                                                                                                                                                            | ,517                                                                                                                                                          | ,488                                                                                                                                                      |
| ,449                                                                                                                             | ,484                                                                                                                                                        | ,375                                                                                                                                              | ,479                                                                                                                                                       | ,515                                                                                                                                 | ,595                                                                                                                              | ,608 <sup>a</sup>                                                                                                                                                         | ,485                                                                                                                                                                | ,604                                                                                                                            | ,596                                                                                                                                           | ,576                                                                                                                             | ,496                                                                                                                                                  | ,483                                                                                                                                               | ,609                                                                                                                                                                           | ,591                                                                                                                                                            | ,630                                                                                                                                                           | ,576                                                                                                                                                            | ,528                                                                                                                                                          | ,498                                                                                                                                                      |
| ,358                                                                                                                             | ,386                                                                                                                                                        | ,299                                                                                                                                              | ,382                                                                                                                                                       | ,411                                                                                                                                 | ,475                                                                                                                              | ,485                                                                                                                                                                      | ,386 <sup>a</sup>                                                                                                                                                   | ,482                                                                                                                            | ,475                                                                                                                                           | ,459                                                                                                                             | ,492                                                                                                                                                  | ,385                                                                                                                                               | ,486                                                                                                                                                                           | ,471                                                                                                                                                            | ,502                                                                                                                                                           | ,459                                                                                                                                                            | ,421                                                                                                                                                          | ,397                                                                                                                                                      |
| ,446                                                                                                                             | ,481                                                                                                                                                        | ,373                                                                                                                                              | ,476                                                                                                                                                       | ,512                                                                                                                                 | ,591                                                                                                                              | ,604                                                                                                                                                                      | ,482                                                                                                                                                                | ,600 <sup>a</sup>                                                                                                               | ,592                                                                                                                                           | ,572                                                                                                                             | ,492                                                                                                                                                  | ,480                                                                                                                                               | ,606                                                                                                                                                                           | ,587                                                                                                                                                            | ,626                                                                                                                                                           | ,573                                                                                                                                                            | ,525                                                                                                                                                          | ,495                                                                                                                                                      |
| ,440                                                                                                                             | ,475                                                                                                                                                        | ,368                                                                                                                                              | ,470                                                                                                                                                       | ,585 <sup>a</sup>                                                                                                                    | ,475                                                                                                                              | ,586                                                                                                                                                                      | ,482                                                                                                                                                                | ,582                                                                                                                            | ,585 <sup>a</sup>                                                                                                                              | ,565                                                                                                                             | ,486                                                                                                                                                  | ,474                                                                                                                                               | ,598                                                                                                                                                                           | ,580                                                                                                                                                            | ,618                                                                                                                                                           | ,565                                                                                                                                                            | ,518                                                                                                                                                          | ,489                                                                                                                                                      |
| ,425                                                                                                                             | ,459                                                                                                                                                        | ,355                                                                                                                                              | ,454                                                                                                                                                       | ,488                                                                                                                                 | ,564                                                                                                                              | ,576                                                                                                                                                                      | ,459                                                                                                                                                                | ,572                                                                                                                            | ,585                                                                                                                                           | ,546 <sup>a</sup>                                                                                                                | ,470                                                                                                                                                  | ,458                                                                                                                                               | ,577                                                                                                                                                                           | ,560                                                                                                                                                            | ,597                                                                                                                                                           | ,546                                                                                                                                                            | ,500                                                                                                                                                          | ,472                                                                                                                                                      |

Reproduzierte Korrelationen

|                                                                                                                                  | [ Ich kann mir konkrete Schreibziele setzen. ] Um Ihnen die Beantwortung zu erleichtern, können Sie die Antwort in Prozent geben                            | [ Ich kann meine Ideen auch bei einem komplexen Thema gut organisieren. ] Um Ihnen die Beantwortung zu erleichtern, können Sie die Antwort in Prozent geben | [ Ich kann mich dazu motivieren mit dem Schreiben anzufangen. ] Um Ihnen die Beantwortung zu erleichtern, können Sie die Antwort in Prozent geben   | [ Ich kann Probleme, die beim Schreiben auftauchen, überwinden. ] Um Ihnen die Beantwortung zu erleichtern, können Sie die Antwort in Prozent geben | [ Ich kann Interesse für das Schreiben entwickeln. ] Um Ihnen die Beantwortung zu erleichtern, können Sie die Antwort in Prozent geben                     | [ Ich kann leicht Wege finden mein Interesse am Schreiben zu steigern. ] Um Ihnen die Beantwortung zu erleichtern, können Sie die Antwort in Prozent geben | [ Ich kann mich auf das Schreiben konzentrieren. ] Um Ihnen die Beantwortung zu erleichtern, können Sie die Antwort in Prozent geben | [ Ich kann meine Schreibzeit effektiv nutzen. ] Um Ihnen die Beantwortung zu erleichtern, können Sie die Antwort in Prozent geben                                         | [ Ich kann mir meine Zeit so einteilen, dass ich konzentriert an meinem Text arbeite. ] Um Ihnen die Beantwortung zu erleichtern, können Sie die Antwort in Prozent geben | [ Ich kann mir meinen Schreibplatz so gestalten, dass ich ungestört schreiben kann. ] Um Ihnen die Beantwortung zu erleichtern, können Sie die Antwort in Prozent geben            | [ Ich kann mein Vorgehen beim Schreiben ändern, wenn ich merke, dass es nicht erfolgreich ist. ] Um Ihnen die Beantwortung zu erleichtern, können Sie die Antwort in Prozent geben | [ Ich kann beim Schreiben Vorankommen nachvollziehen. ] Um Ihnen die Beantwortung zu erleichtern, können Sie die Antwort in Prozent geben        | [ Ich kann mein Vorgehen beim Schreiben ausdauernd anwenden. ] Um Ihnen die Beantwortung zu erleichtern, können Sie die Antwort in Prozent geben      | [ Ich kann eine Schreibblockade lösen und danach weiterschreiben. ] Um Ihnen die Beantwortung zu erleichtern, können Sie die Antwort in Prozent geben | [ Ich kann die Qualität meines Textes einschätzen. ] Um Ihnen die Beantwortung zu erleichtern, können Sie die Antwort in Prozent geben                                         | [ Ich kann die von mir selbst gesetzten Kriterien für die Qualität meiner Texte erreichen. ] Um Ihnen die Beantwortung zu erleichtern, können Sie die Antwort in Prozent geben | [ Ich kann die von mir selbst gesetzten Teilsziele beim Schreiben erreichen. ] Um Ihnen die Beantwortung zu erleichtern, können Sie die Antwort in Prozent geben | [ Ich kann ein gutes Gefühl für das Vorankommen beim Schreiben entwickeln. ] Um Ihnen die Beantwortung zu erleichtern, können Sie die Antwort in Prozent geben  | [ Ich kann vermeiden, dass ich einen Fehler beim nächsten Mal wieder mache. ] Um Ihnen die Beantwortung zu erleichtern, können Sie die Antwort in Prozent geben | [ Ich kann mein Vorgehen bei Schreibprojekten durch Erfahrung verbessern. ] Um Ihnen die Beantwortung zu erleichtern, können Sie die Antwort in Prozent geben | [ Ich kann einschätzen, was ich beim nächsten Mal anders machen muss. ] Um Ihnen die Beantwortung zu erleichtern, können Sie die Antwort in Prozent geben |
|----------------------------------------------------------------------------------------------------------------------------------|-------------------------------------------------------------------------------------------------------------------------------------------------------------|-------------------------------------------------------------------------------------------------------------------------------------------------------------|-----------------------------------------------------------------------------------------------------------------------------------------------------|-----------------------------------------------------------------------------------------------------------------------------------------------------|------------------------------------------------------------------------------------------------------------------------------------------------------------|------------------------------------------------------------------------------------------------------------------------------------------------------------|--------------------------------------------------------------------------------------------------------------------------------------|---------------------------------------------------------------------------------------------------------------------------------------------------------------------------|---------------------------------------------------------------------------------------------------------------------------------------------------------------------------|------------------------------------------------------------------------------------------------------------------------------------------------------------------------------------|------------------------------------------------------------------------------------------------------------------------------------------------------------------------------------|--------------------------------------------------------------------------------------------------------------------------------------------------|-------------------------------------------------------------------------------------------------------------------------------------------------------|-------------------------------------------------------------------------------------------------------------------------------------------------------|--------------------------------------------------------------------------------------------------------------------------------------------------------------------------------|--------------------------------------------------------------------------------------------------------------------------------------------------------------------------------|------------------------------------------------------------------------------------------------------------------------------------------------------------------|-----------------------------------------------------------------------------------------------------------------------------------------------------------------|-----------------------------------------------------------------------------------------------------------------------------------------------------------------|---------------------------------------------------------------------------------------------------------------------------------------------------------------|-----------------------------------------------------------------------------------------------------------------------------------------------------------|
| [ Ich kann mir konkrete Schreibziele setzen. ] Um Ihnen die Beantwortung zu erleichtern, können Sie die Antwort in Prozent geben | [ Ich kann meine Ideen auch bei einem komplexen Thema gut organisieren. ] Um Ihnen die Beantwortung zu erleichtern, können Sie die Antwort in Prozent geben | [ Ich kann mich dazu motivieren mit dem Schreiben anzufangen. ] Um Ihnen die Beantwortung zu erleichtern, können Sie die Antwort in Prozent geben           | [ Ich kann Probleme, die beim Schreiben auftauchen, überwinden. ] Um Ihnen die Beantwortung zu erleichtern, können Sie die Antwort in Prozent geben | [ Ich kann Interesse für das Schreiben entwickeln. ] Um Ihnen die Beantwortung zu erleichtern, können Sie die Antwort in Prozent geben              | [ Ich kann leicht Wege finden mein Interesse am Schreiben zu steigern. ] Um Ihnen die Beantwortung zu erleichtern, können Sie die Antwort in Prozent geben | [ Ich kann mich auf das Schreiben konzentrieren. ] Um Ihnen die Beantwortung zu erleichtern, können Sie die Antwort in Prozent geben                       | [ Ich kann meine Schreibzeit effektiv nutzen. ] Um Ihnen die Beantwortung zu erleichtern, können Sie die Antwort in Prozent geben    | [ Ich kann mir meine Zeit so einteilen, dass ich konzentriert an meinem Text arbeite. ] Um Ihnen die Beantwortung zu erleichtern, können Sie die Antwort in Prozent geben | [ Ich kann mir meinen Schreibplatz so gestalten, dass ich ungestört schreiben kann. ] Um Ihnen die Beantwortung zu erleichtern, können Sie die Antwort in Prozent geben   | [ Ich kann mein Vorgehen beim Schreiben ändern, wenn ich merke, dass es nicht erfolgreich ist. ] Um Ihnen die Beantwortung zu erleichtern, können Sie die Antwort in Prozent geben | [ Ich kann beim Schreiben Vorankommen nachvollziehen. ] Um Ihnen die Beantwortung zu erleichtern, können Sie die Antwort in Prozent geben                                          | [ Ich kann mein Vorgehen beim Schreiben ausdauernd anwenden. ] Um Ihnen die Beantwortung zu erleichtern, können Sie die Antwort in Prozent geben | [ Ich kann eine Schreibblockade lösen und danach weiterschreiben. ] Um Ihnen die Beantwortung zu erleichtern, können Sie die Antwort in Prozent geben | [ Ich kann die Qualität meines Textes einschätzen. ] Um Ihnen die Beantwortung zu erleichtern, können Sie die Antwort in Prozent geben                | [ Ich kann die von mir selbst gesetzten Kriterien für die Qualität meiner Texte erreichen. ] Um Ihnen die Beantwortung zu erleichtern, können Sie die Antwort in Prozent geben | [ Ich kann die von mir selbst gesetzten Teilsziele beim Schreiben erreichen. ] Um Ihnen die Beantwortung zu erleichtern, können Sie die Antwort in Prozent geben               | [ Ich kann ein gutes Gefühl für das Vorankommen beim Schreiben entwickeln. ] Um Ihnen die Beantwortung zu erleichtern, können Sie die Antwort in Prozent geben   | [ Ich kann vermeiden, dass ich einen Fehler beim nächsten Mal wieder mache. ] Um Ihnen die Beantwortung zu erleichtern, können Sie die Antwort in Prozent geben | [ Ich kann mein Vorgehen bei Schreibprojekten durch Erfahrung verbessern. ] Um Ihnen die Beantwortung zu erleichtern, können Sie die Antwort in Prozent geben   | [ Ich kann einschätzen, was ich beim nächsten Mal anders machen muss. ] Um Ihnen die Beantwortung zu erleichtern, können Sie die Antwort in Prozent geben     |                                                                                                                                                           |
| .366                                                                                                                             | .395                                                                                                                                                        | .306                                                                                                                                                        | .423                                                                                                                                                | .390                                                                                                                                                | .385                                                                                                                                                       | .485                                                                                                                                                       | .486                                                                                                                                 | .486                                                                                                                                                                      | .482                                                                                                                                                                      | .395                                                                                                                                                                               | .486                                                                                                                                                                               | .470                                                                                                                                             | .404 <sup>a</sup>                                                                                                                                     | .394                                                                                                                                                  | .497                                                                                                                                                                           | .482                                                                                                                                                                           | .514                                                                                                                                                             | .470                                                                                                                                                            | .482                                                                                                                                                            | .514                                                                                                                                                          | .406                                                                                                                                                      |
| .357                                                                                                                             | .385                                                                                                                                                        | .298                                                                                                                                                        | .412                                                                                                                                                | .381                                                                                                                                                | .385                                                                                                                                                       | .473                                                                                                                                                       | .483                                                                                                                                 | .483                                                                                                                                                                      | .480                                                                                                                                                                      | .385                                                                                                                                                                               | .474                                                                                                                                                                               | .458                                                                                                                                             | .394                                                                                                                                                  | .384 <sup>a</sup>                                                                                                                                     | .484                                                                                                                                                                           | .470                                                                                                                                                                           | .501                                                                                                                                                             | .458                                                                                                                                                            | .470                                                                                                                                                            | .501                                                                                                                                                          | .430                                                                                                                                                      |
| .450                                                                                                                             | .486                                                                                                                                                        | .376                                                                                                                                                        | .520                                                                                                                                                | .480                                                                                                                                                | .485                                                                                                                                                       | .597                                                                                                                                                       | .609                                                                                                                                 | .609                                                                                                                                                                      | .606                                                                                                                                                                      | .486                                                                                                                                                                               | .598                                                                                                                                                                               | .577                                                                                                                                             | .497                                                                                                                                                  | .484                                                                                                                                                  | .611 <sup>a</sup>                                                                                                                                                              | .592                                                                                                                                                                           | .631                                                                                                                                                             | .578                                                                                                                                                            | .592                                                                                                                                                            | .631                                                                                                                                                          | .499                                                                                                                                                      |
| .436                                                                                                                             | .471                                                                                                                                                        | .365                                                                                                                                                        | .504                                                                                                                                                | .465                                                                                                                                                | .470                                                                                                                                                       | .579                                                                                                                                                       | .591                                                                                                                                 | .591                                                                                                                                                                      | .587                                                                                                                                                                      | .471                                                                                                                                                                               | .580                                                                                                                                                                               | .560                                                                                                                                             | .482                                                                                                                                                  | .470                                                                                                                                                  | .592                                                                                                                                                                           | .574 <sup>a</sup>                                                                                                                                                              | .612                                                                                                                                                             | .560                                                                                                                                                            | .574 <sup>a</sup>                                                                                                                                               | .612                                                                                                                                                          | .484                                                                                                                                                      |
| .465                                                                                                                             | .502                                                                                                                                                        | .389                                                                                                                                                        | .537                                                                                                                                                | .496                                                                                                                                                | .501                                                                                                                                                       | .617                                                                                                                                                       | .630                                                                                                                                 | .630                                                                                                                                                                      | .626                                                                                                                                                                      | .502                                                                                                                                                                               | .618                                                                                                                                                                               | .597                                                                                                                                             | .514                                                                                                                                                  | .501                                                                                                                                                  | .631                                                                                                                                                                           | .612                                                                                                                                                                           | .653 <sup>a</sup>                                                                                                                                                | .597                                                                                                                                                            | .612                                                                                                                                                            | .653 <sup>a</sup>                                                                                                                                             | .516                                                                                                                                                      |
| .425                                                                                                                             | .459                                                                                                                                                        | .356                                                                                                                                                        | .491                                                                                                                                                | .454                                                                                                                                                | .459                                                                                                                                                       | .564                                                                                                                                                       | .576                                                                                                                                 | .576                                                                                                                                                                      | .573                                                                                                                                                                      | .459                                                                                                                                                                               | .565                                                                                                                                                                               | .546                                                                                                                                             | .470                                                                                                                                                  | .458                                                                                                                                                  | .578                                                                                                                                                                           | .560                                                                                                                                                                           | .597                                                                                                                                                             | .546                                                                                                                                                            | .560                                                                                                                                                            | .597                                                                                                                                                          | .472                                                                                                                                                      |
| .390                                                                                                                             | .421                                                                                                                                                        | .326                                                                                                                                                        | .450                                                                                                                                                | .416                                                                                                                                                | .420                                                                                                                                                       | .517                                                                                                                                                       | .528                                                                                                                                 | .528                                                                                                                                                                      | .525                                                                                                                                                                      | .421                                                                                                                                                                               | .518                                                                                                                                                                               | .500                                                                                                                                             | .430                                                                                                                                                  | .420                                                                                                                                                  | .529                                                                                                                                                                           | .513                                                                                                                                                                           | .547                                                                                                                                                             | .500                                                                                                                                                            | .513                                                                                                                                                            | .547                                                                                                                                                          | .433                                                                                                                                                      |
| .368                                                                                                                             | .397                                                                                                                                                        | .307                                                                                                                                                        | .425                                                                                                                                                | .392                                                                                                                                                | .397                                                                                                                                                       | .488                                                                                                                                                       | .488                                                                                                                                 | .488                                                                                                                                                                      | .485                                                                                                                                                                      | .397                                                                                                                                                                               | .489                                                                                                                                                                               | .472                                                                                                                                             | .406                                                                                                                                                  | .396                                                                                                                                                  | .499                                                                                                                                                                           | .484                                                                                                                                                                           | .516                                                                                                                                                             | .472                                                                                                                                                            | .484                                                                                                                                                            | .516                                                                                                                                                          | .408 <sup>a</sup>                                                                                                                                         |
| Residuum <sup>b</sup>                                                                                                            |                                                                                                                                                             |                                                                                                                                                             |                                                                                                                                                     |                                                                                                                                                     |                                                                                                                                                            |                                                                                                                                                            |                                                                                                                                      |                                                                                                                                                                           |                                                                                                                                                                           |                                                                                                                                                                                    |                                                                                                                                                                                    |                                                                                                                                                  |                                                                                                                                                       |                                                                                                                                                       |                                                                                                                                                                                |                                                                                                                                                                                |                                                                                                                                                                  |                                                                                                                                                                 |                                                                                                                                                                 |                                                                                                                                                               |                                                                                                                                                           |
|                                                                                                                                  | .029                                                                                                                                                        | .082                                                                                                                                                        | -.019                                                                                                                                               | .008                                                                                                                                                | .033                                                                                                                                                       | .100                                                                                                                                                       | .030                                                                                                                                 | .030                                                                                                                                                                      | -.063                                                                                                                                                                     | -.063                                                                                                                                                                              | -.017                                                                                                                                                                              | -.083                                                                                                                                            | -.013                                                                                                                                                 | -.026                                                                                                                                                 | -.084                                                                                                                                                                          | .079                                                                                                                                                                           | .048                                                                                                                                                             | -.038                                                                                                                                                           | .079                                                                                                                                                            | .048                                                                                                                                                          | -.087                                                                                                                                                     |
| .029                                                                                                                             | -.107                                                                                                                                                       | -.107                                                                                                                                                       | .075                                                                                                                                                | -.025                                                                                                                                               | .069                                                                                                                                                       | .002                                                                                                                                                       | .057                                                                                                                                 | .057                                                                                                                                                                      | -.041                                                                                                                                                                     | -.041                                                                                                                                                                              | -.054                                                                                                                                                                              | -.033                                                                                                                                            | .014                                                                                                                                                  | .179                                                                                                                                                  | .099                                                                                                                                                                           | -.031                                                                                                                                                                          | -.046                                                                                                                                                            | -.028                                                                                                                                                           | -.031                                                                                                                                                           | -.046                                                                                                                                                         | -.093                                                                                                                                                     |
| .082                                                                                                                             | -.107                                                                                                                                                       | .003                                                                                                                                                        | .003                                                                                                                                                | .023                                                                                                                                                | .179                                                                                                                                                       | .034                                                                                                                                                       | .066                                                                                                                                 | .066                                                                                                                                                                      | -.066                                                                                                                                                                     | -.066                                                                                                                                                                              | -.104                                                                                                                                                                              | .028                                                                                                                                             | .034                                                                                                                                                  | -.209                                                                                                                                                 | -.023                                                                                                                                                                          | .042                                                                                                                                                                           | .079                                                                                                                                                             | -.090                                                                                                                                                           | .042                                                                                                                                                            | .079                                                                                                                                                          | .000                                                                                                                                                      |
| -.019                                                                                                                            | .075                                                                                                                                                        | .003                                                                                                                                                        | .035                                                                                                                                                | .074                                                                                                                                                | -.028                                                                                                                                                      | -.051                                                                                                                                                      | -.142                                                                                                                                | -.142                                                                                                                                                                     | .014                                                                                                                                                                      | -.153                                                                                                                                                                              | .074                                                                                                                                                                               | .040                                                                                                                                             | .147                                                                                                                                                  | .029                                                                                                                                                  | .055                                                                                                                                                                           | -.011                                                                                                                                                                          | -.054                                                                                                                                                            | .039                                                                                                                                                            | -.011                                                                                                                                                           | -.054                                                                                                                                                         | -.049                                                                                                                                                     |
| .008                                                                                                                             | -.025                                                                                                                                                       | .023                                                                                                                                                        | .020                                                                                                                                                | .074                                                                                                                                                | .140                                                                                                                                                       | -.087                                                                                                                                                      | -.128                                                                                                                                | -.128                                                                                                                                                                     | -.058                                                                                                                                                                     | .054                                                                                                                                                                               | -.005                                                                                                                                                                              | .115                                                                                                                                             | .003                                                                                                                                                  | -.064                                                                                                                                                 | .038                                                                                                                                                                           | -.096                                                                                                                                                                          | .014                                                                                                                                                             | .025                                                                                                                                                            | -.096                                                                                                                                                           | .014                                                                                                                                                          | -.085                                                                                                                                                     |
| .033                                                                                                                             | .069                                                                                                                                                        | .179                                                                                                                                                        | -.028                                                                                                                                               | .140                                                                                                                                                | .140                                                                                                                                                       | -.047                                                                                                                                                      | .045                                                                                                                                 | .045                                                                                                                                                                      | -.099                                                                                                                                                                     | .080                                                                                                                                                                               | -.124                                                                                                                                                                              | 1.309E-5                                                                                                                                         | -.032                                                                                                                                                 | -.168                                                                                                                                                 | .032                                                                                                                                                                           | -.030                                                                                                                                                                          | .030                                                                                                                                                             | -.041                                                                                                                                                           | -.030                                                                                                                                                           | .030                                                                                                                                                          | -.011                                                                                                                                                     |





Reproduzierte Korrelationen

| [ Ich kann mir konkrete Schreibziele setzen. ] Um Ihnen die Beantwortung zu erleichtern, können Sie die Antwort in Prozent geben | [ Ich kann meine Ideen auch bei einem komplexen Thema gut organisieren. ] Um Ihnen die Beantwortung zu erleichtern, können Sie die Antwort in Prozent geben | [ Ich kann mich dazu motivieren mit dem Schreiben anzufangen. ] Um Ihnen die Beantwortung zu erleichtern, können Sie die Antwort in Prozent geben | [ Ich kann Probleme, die beim Schreiben auftauchen, überwinden. ] Um Ihnen die Beantwortung zu erleichtern, können Sie die Antwort in Prozent geben | [ Ich kann leicht Wege finden mein Interesse am Schreiben zu steigern. ] Um Ihnen die Beantwortung zu erleichtern, können Sie die Antwort in Prozent geben | [ Ich kann mich auf das Schreiben konzentrieren. ] Um Ihnen die Beantwortung zu erleichtern, können Sie die Antwort in Prozent geben | [ Ich kann meine Schreibzeit effektiv nutzen. ] Um Ihnen die Beantwortung zu erleichtern, können Sie die Antwort in Prozent geben | [ Ich kann mir meine Zeit so einteilen, dass ich konzentriert an meinem Text arbeite. ] Um Ihnen die Beantwortung zu erleichtern, können Sie die Antwort in Prozent geben | [ Ich kann mir meinen Schreibplatz so gestalten, dass ich ungestört schreiben kann. ] Um Ihnen die Beantwortung zu erleichtern, können Sie die Antwort in Prozent geben | [ Ich kann mein Vorgehen beim Schreiben ändern, wenn ich merke, dass es nicht erfolgreich ist. ] Um Ihnen die Beantwortung zu erleichtern, können Sie die Antwort in Prozent geben | [ Ich kann mein Vorankommen beim Schreiben nachvollziehen. ] Um Ihnen die Beantwortung zu erleichtern, können Sie die Antwort in Prozent geben | [ Ich kann mein Text ausdauernd anarbeiten. ] Um Ihnen die Beantwortung zu erleichtern, können Sie die Antwort in Prozent geben | [ Ich kann eine Schreibblockade lösen und danach weiterschreiben. ] Um Ihnen die Beantwortung zu erleichtern, können Sie die Antwort in Prozent geben | [ Ich kann die Qualität meines Textes realistisch einschätzen. ] Um Ihnen die Beantwortung zu erleichtern, können Sie die Antwort in Prozent geben | [ Ich kann die von mir selbst gesetzten Kriterien für die Qualität meiner Texte erreichen. ] Um Ihnen die Beantwortung zu erleichtern, können Sie die Antwort in Prozent geben | [ Ich kann die von mir selbst gesetzten Teilziele beim Schreiben erreichen. ] Um Ihnen die Beantwortung zu erleichtern, können Sie die Antwort in Prozent geben | [ Ich kann ein gutes Gefühl für das Vorankommen beim Schreiben entwickeln. ] Um Ihnen die Beantwortung zu erleichtern, können Sie die Antwort in Prozent geben | [ Ich kann vermeiden, dass ich einen Fehler beim nächsten Mal wieder mache. ] Um Ihnen die Beantwortung zu erleichtern, können Sie die Antwort in Prozent geben | [ Ich kann mein Vorgehen bei Schreibprojekten durch Erfahrung verbessern. ] Um Ihnen die Beantwortung zu erleichtern, können Sie die Antwort in Prozent geben | [ Ich kann einschätzen, was ich beim nächsten Mal anders machen muss. ] Um Ihnen die Beantwortung zu erleichtern, können Sie die Antwort in Prozent geben |
|----------------------------------------------------------------------------------------------------------------------------------|-------------------------------------------------------------------------------------------------------------------------------------------------------------|---------------------------------------------------------------------------------------------------------------------------------------------------|-----------------------------------------------------------------------------------------------------------------------------------------------------|------------------------------------------------------------------------------------------------------------------------------------------------------------|--------------------------------------------------------------------------------------------------------------------------------------|-----------------------------------------------------------------------------------------------------------------------------------|---------------------------------------------------------------------------------------------------------------------------------------------------------------------------|-------------------------------------------------------------------------------------------------------------------------------------------------------------------------|------------------------------------------------------------------------------------------------------------------------------------------------------------------------------------|------------------------------------------------------------------------------------------------------------------------------------------------|---------------------------------------------------------------------------------------------------------------------------------|-------------------------------------------------------------------------------------------------------------------------------------------------------|----------------------------------------------------------------------------------------------------------------------------------------------------|--------------------------------------------------------------------------------------------------------------------------------------------------------------------------------|-----------------------------------------------------------------------------------------------------------------------------------------------------------------|----------------------------------------------------------------------------------------------------------------------------------------------------------------|-----------------------------------------------------------------------------------------------------------------------------------------------------------------|---------------------------------------------------------------------------------------------------------------------------------------------------------------|-----------------------------------------------------------------------------------------------------------------------------------------------------------|
| .014                                                                                                                             | -.045                                                                                                                                                       | -.045                                                                                                                                             | -.042                                                                                                                                               | -.032                                                                                                                                                      | -.049                                                                                                                                | .045                                                                                                                              | .061                                                                                                                                                                      | .067                                                                                                                                                                    | .005                                                                                                                                                                               | -.030                                                                                                                                          | -.111                                                                                                                           | -.091                                                                                                                                                 | .034                                                                                                                                               | -.066                                                                                                                                                                          | -.004                                                                                                                                                           | .001                                                                                                                                                           | .156                                                                                                                                                            | .140                                                                                                                                                          |                                                                                                                                                           |
| -.087                                                                                                                            | -.093                                                                                                                                                       | .000                                                                                                                                              | -.049                                                                                                                                               | -.065                                                                                                                                                      | .067                                                                                                                                 | -.003                                                                                                                             | .043                                                                                                                                                                      | .019                                                                                                                                                                    | .044                                                                                                                                                                               | -.036                                                                                                                                          | -.033                                                                                                                           | -.071                                                                                                                                                 | .030                                                                                                                                               | -.034                                                                                                                                                                          | -.005                                                                                                                                                           | -.044                                                                                                                                                          | .115                                                                                                                                                            | .140                                                                                                                                                          |                                                                                                                                                           |

Extraktionsmethode: Hauptachsen-Faktorenanalyse.

a. Reproduzierte Kommunalitäten

b. Residuen werden zwischen beobachteten und reproduzierten Korrelationen berechnet. Es liegen 91 (39,0%) nicht redundante Residuen mit absoluten Werten größer 0,05 vor.

\*\*\*\*\*SWRS\*\*\*\*\*

\*Skalenbildung SWSRS\*

```

COMPUTE SWSRS_22=MEAN(SWSRS_prä_aa_2, SWSRS_prä_aa_6, SWSRS_prä_sm_1, SWSRS_prä_sm_3,
SWSRS_prä_sm_7, SWSRS_prä_sm_8, SWSRS_akt_sk_1, SWSRS_akt_sk_7,
SWSRS_akt_sk_15, SWSRS_akt_sk_17, SWSRS_akt_sk_19, SWSRS_akt_sb_2, SWSRS_akt_sb_4,
SWSRS_akt_sb_7, SWSRS_akt_sb_9, SWSRS_post_sb_1, SWSRS_post_sb_3,
SWSRS_post_sb_4, SWSRS_post_sr_2, SWSRS_post_sr_4, SWSRS_post_sr_6, SWSRS_post_sr_7).
EXECUTE.

```

\*Reliabilität SWSRS\*

RELIABILITY

```

/VARIABLES=SWSRS_prä_aa_2, SWSRS_prä_aa_6, SWSRS_prä_sm_1, SWSRS_prä_sm_3,
SWSRS_prä_sm_7, SWSRS_prä_sm_8, SWSRS_akt_sk_1, SWSRS_akt_sk_7,
SWSRS_akt_sk_15, SWSRS_akt_sk_17, SWSRS_akt_sk_19, SWSRS_akt_sb_2, SWSRS_akt_sb_4,
SWSRS_akt_sb_7, SWSRS_akt_sb_9, SWSRS_post_sb_1, SWSRS_post_sb_3,
SWSRS_post_sb_4, SWSRS_post_sr_2, SWSRS_post_sr_4, SWSRS_post_sr_6, SWSRS_post_sr_7
/SCALE('SWSRS_22') ALL
/MODEL=ALPHA
/STATISTICS=DESCRIPTIVE SCALE
/SUMMARY=TOTAL.

```

Reliabilität

Skala: SWSRS\_22

**Zusammenfassung der Fallverarbeitung**

|                             | N   | %     |
|-----------------------------|-----|-------|
| Fälle Gültig                | 121 | 100,0 |
| Ausgeschlossen <sup>a</sup> | 0   | ,0    |
| Gesamt                      | 121 | 100,0 |

a. Listenweise Löschung auf der Grundlage aller Variablen in der Prozedur.

**Reliabilitätsstatistiken**

|                 |                  |
|-----------------|------------------|
| Cronbachs Alpha | Anzahl der Items |
| ,951            | 22               |

**Itemstatistiken**

|                                                                                                                                                             | Mittelwert | Standardabweichung | N   |
|-------------------------------------------------------------------------------------------------------------------------------------------------------------|------------|--------------------|-----|
| [ Ich kann mir konkrete Schreibziele setzen. ] Um Ihnen die Beantwortung zu erleichtern, können Sie die Antwort in Prozent geben                            | 7,05       | 2,866              | 121 |
| [ Ich kann meine Ideen auch bei einem komplexen Thema gut organisieren. ] Um Ihnen die Beantwortung zu erleichtern, können Sie die Antwort in Prozent geben | 7,17       | 2,502              | 121 |
| [ Ich kann mich dazu motivieren mit dem Schreiben anzufangen. ] Um Ihnen die Beantwortung zu erleichtern, können Sie die Antwort in Prozent geben           | 6,17       | 3,057              | 121 |
| [ Ich kann Probleme, die beim Schreiben auftauchen, überwinden. ] Um Ihnen die Beantwortung zu erleichtern, können Sie die Antwort in Prozent geben         | 7,73       | 2,244              | 121 |
| [ Ich kann Interesse für das Schreiben entwickeln. ] Um Ihnen die Beantwortung zu erleichtern, können Sie die Antwort in Prozent geben                      | 7,64       | 2,787              | 121 |

Itemstatistiken

|                                                                                                                                                                                                           | Mittelwert | Standardabweichung | N   |
|-----------------------------------------------------------------------------------------------------------------------------------------------------------------------------------------------------------|------------|--------------------|-----|
| <input type="checkbox"/> Ich kann leicht Wege finden mein Interesse am Schreiben zu steigern. ] Um Ihnen die Beantwortung zu erleichtern, können Sie die Antwort in Prozent geben                         | 5,87       | 2,735              | 121 |
| <input type="checkbox"/> Ich kann mein Vorgehen beim Schreiben überwachen. ] Um Ihnen die Beantwortung zu erleichtern, können Sie die Antwort in Prozent geben                                            | 6,28       | 2,829              | 121 |
| <input type="checkbox"/> Ich kann mich auf das Schreiben konzentrieren. ] Um Ihnen die Beantwortung zu erleichtern, können Sie die Antwort in Prozent geben                                               | 7,54       | 2,717              | 121 |
| <input type="checkbox"/> Ich kann meine Schreibzeit effektiv nutzen. ] Um Ihnen die Beantwortung zu erleichtern, können Sie die Antwort in Prozent geben                                                  | 6,56       | 2,834              | 121 |
| <input type="checkbox"/> Ich kann mir meine Zeit so einteilen, dass ich konzentriert an meinem Text arbeite. ] Um Ihnen die Beantwortung zu erleichtern, können Sie die Antwort in Prozent geben          | 6,67       | 2,879              | 121 |
| <input type="checkbox"/> Ich kann mir meinen Schreibplatz so gestalten, dass ich ungestört schreiben kann. ] Um Ihnen die Beantwortung zu erleichtern, können Sie die Antwort in Prozent geben            | 7,31       | 3,019              | 121 |
| <input type="checkbox"/> Ich kann mein Vorgehen beim Schreiben ändern, wenn ich merke, dass es nicht erfolgreich ist. ] Um Ihnen die Beantwortung zu erleichtern, können Sie die Antwort in Prozent geben | 7,12       | 2,762              | 121 |
| <input type="checkbox"/> Ich kann mein Vorankommen beim Schreiben nachvollziehen. ] Um Ihnen die Beantwortung zu erleichtern, können Sie die Antwort in Prozent geben                                     | 7,79       | 2,474              | 121 |

Itemstatistiken

|                                                                                                                                                                                | Mittelwert | Standardabweichung | N   |
|--------------------------------------------------------------------------------------------------------------------------------------------------------------------------------|------------|--------------------|-----|
| [ Ich kann ausdauernd an meinem Text arbeiten. ] Um Ihnen die Beantwortung zu erleichtern, können Sie die Antwort in Prozent geben                                             | 7,32       | 2,905              | 121 |
| [ Ich kann eine Schreibblockade lösen und danach weiterschreiben. ] Um Ihnen die Beantwortung zu erleichtern, können Sie die Antwort in Prozent geben                          | 6,40       | 2,651              | 121 |
| [ Ich kann die Qualität meines Textes realistisch einschätzen. ] Um Ihnen die Beantwortung zu erleichtern, können Sie die Antwort in Prozent geben                             | 7,49       | 2,589              | 121 |
| [ Ich kann die von mir selbst gesetzten Kriterien für die Qualität meiner Texte erreichen. ] Um Ihnen die Beantwortung zu erleichtern, können Sie die Antwort in Prozent geben | 7,84       | 2,429              | 121 |
| [ Ich kann die von mir selbst gesetzten Teilziele beim Schreiben erreichen. ] Um Ihnen die Beantwortung zu erleichtern, können Sie die Antwort in Prozent geben                | 7,19       | 2,919              | 121 |
| [ Ich kann ein gutes Gefühl für das Vorankommen beim Schreiben entwickeln. ] Um Ihnen die Beantwortung zu erleichtern, können Sie die Antwort in Prozent geben                 | 7,20       | 2,747              | 121 |
| [ Ich kann vermeiden, dass ich einen Fehler beim nächsten Mal wieder mache. ] Um Ihnen die Beantwortung zu erleichtern, können Sie die Antwort in Prozent geben                | 7,60       | 2,594              | 121 |
| [ Ich kann mein Vorgehen bei Schreibprojekten durch Erfahrung verbessern. ] Um Ihnen die Beantwortung zu erleichtern, können Sie die Antwort in Prozent geben                  | 7,97       | 2,674              | 121 |
| [ Ich kann einschätzen, was ich beim nächsten Mal anders machen muss. ] Um Ihnen die Beantwortung zu erleichtern, können Sie die Antwort in Prozent geben                      | 7,46       | 2,513              | 121 |

Item-Skala-Statistiken

|                                                                                                                                                             | Skalenmittelwert, wenn Item weggelassen | Skalenvarianz, wenn Item weggelassen | Korrigierte Item-Skala-Korrelation | Cronbachs Alpha, wenn Item weggelassen |
|-------------------------------------------------------------------------------------------------------------------------------------------------------------|-----------------------------------------|--------------------------------------|------------------------------------|----------------------------------------|
| [ Ich kann mir konkrete Schreibziele setzen. ] Um Ihnen die Beantwortung zu erleichtern, können Sie die Antwort in Prozent geben                            | 150,32                                  | 1627,804                             | ,565                               | ,950                                   |
| [ Ich kann meine Ideen auch bei einem komplexen Thema gut organisieren. ] Um Ihnen die Beantwortung zu erleichtern, können Sie die Antwort in Prozent geben | 150,20                                  | 1638,260                             | ,603                               | ,950                                   |
| [ Ich kann mich dazu motivieren mit dem Schreiben anzufangen. ] Um Ihnen die Beantwortung zu erleichtern, können Sie die Antwort in Prozent geben           | 151,20                                  | 1640,360                             | ,472                               | ,952                                   |
| [ Ich kann Probleme, die beim Schreiben auftauchen, überwinden. ] Um Ihnen die Beantwortung zu erleichtern, können Sie die Antwort in Prozent geben         | 149,64                                  | 1643,981                             | ,646                               | ,949                                   |
| [ Ich kann Interesse für das Schreiben entwickeln. ] Um Ihnen die Beantwortung zu erleichtern, können Sie die Antwort in Prozent geben                      | 149,74                                  | 1623,996                             | ,600                               | ,950                                   |
| [ Ich kann leicht Wege finden mein Interesse am Schreiben zu steigern. ] Um Ihnen die Beantwortung zu erleichtern, können Sie die Antwort in Prozent geben  | 151,50                                  | 1623,685                             | ,614                               | ,949                                   |
| [ Ich kann mein Vorgehen beim Schreiben überwachen. ] Um Ihnen die Beantwortung zu erleichtern, können Sie die Antwort in Prozent geben                     | 151,09                                  | 1612,633                             | ,642                               | ,949                                   |
| [ Ich kann mich auf das Schreiben konzentrieren. ] Um Ihnen die Beantwortung zu erleichtern, können Sie die Antwort in Prozent geben                        | 149,83                                  | 1591,739                             | ,772                               | ,947                                   |

Item-Skala-Statistiken

|                                                                                                                                                                                    | Skalenmittelwert, wenn Item weggelassen | Skalenvarianz, wenn Item weggelassen | Korrigierte Item-Skala-Korrelation | Cronbachs Alpha, wenn Item weggelassen |
|------------------------------------------------------------------------------------------------------------------------------------------------------------------------------------|-----------------------------------------|--------------------------------------|------------------------------------|----------------------------------------|
| [ Ich kann meine Schreibzeit effektiv nutzen. ] Um Ihnen die Beantwortung zu erleichtern, können Sie die Antwort in Prozent geben                                                  | 150,81                                  | 1589,839                             | ,747                               | ,948                                   |
| [ Ich kann mir meine Zeit so einteilen, dass ich konzentriert an meinem Text arbeite. ] Um Ihnen die Beantwortung zu erleichtern, können Sie die Antwort in Prozent geben          | 150,70                                  | 1583,327                             | ,764                               | ,947                                   |
| [ Ich kann mir meinen Schreibplatz so gestalten, dass ich ungestört schreiben kann. ] Um Ihnen die Beantwortung zu erleichtern, können Sie die Antwort in Prozent geben            | 150,06                                  | 1610,072                             | ,608                               | ,950                                   |
| [ Ich kann mein Vorgehen beim Schreiben ändern, wenn ich merke, dass es nicht erfolgreich ist. ] Um Ihnen die Beantwortung zu erleichtern, können Sie die Antwort in Prozent geben | 150,25                                  | 1593,238                             | ,752                               | ,948                                   |
| [ Ich kann mein Vorankommen beim Schreiben nachvollziehen. ] Um Ihnen die Beantwortung zu erleichtern, können Sie die Antwort in Prozent geben                                     | 149,59                                  | 1613,628                             | ,739                               | ,948                                   |
| [ Ich kann ausdauernd an meinem Text arbeiten. ] Um Ihnen die Beantwortung zu erleichtern, können Sie die Antwort in Prozent geben                                                 | 150,05                                  | 1591,298                             | ,720                               | ,948                                   |
| [ Ich kann eine Schreibblockade lösen und danach weiterschreiben. ] Um Ihnen die Beantwortung zu erleichtern, können Sie die Antwort in Prozent geben                              | 150,97                                  | 1627,332                             | ,618                               | ,949                                   |
| [ Ich kann die Qualität meines Textes realistisch einschätzen. ] Um Ihnen die Beantwortung zu erleichtern, können Sie die Antwort in Prozent geben                                 | 149,88                                  | 1636,237                             | ,590                               | ,950                                   |

Item-Skala-Statistiken

|                                                                                                                                                                                | Skalenmittelwert, wenn Item weggelassen | Skalenvarianz, wenn Item weggelassen | Korrigierte Item-Skala-Korrelation | Cronbachs Alpha, wenn Item weggelassen |
|--------------------------------------------------------------------------------------------------------------------------------------------------------------------------------|-----------------------------------------|--------------------------------------|------------------------------------|----------------------------------------|
| [ Ich kann die von mir selbst gesetzten Kriterien für die Qualität meiner Texte erreichen. ] Um Ihnen die Beantwortung zu erleichtern, können Sie die Antwort in Prozent geben | 149,53                                  | 1612,601                             | ,759                               | ,948                                   |
| [ Ich kann die von mir selbst gesetzten Teilziele beim Schreiben erreichen. ] Um Ihnen die Beantwortung zu erleichtern, können Sie die Antwort in Prozent geben                | 150,18                                  | 1586,533                             | ,738                               | ,948                                   |
| [ Ich kann ein gutes Gefühl für das Vorankommen beim Schreiben entwickeln. ] Um Ihnen die Beantwortung zu erleichtern, können Sie die Antwort in Prozent geben                 | 150,17                                  | 1586,128                             | ,790                               | ,947                                   |
| [ Ich kann vermeiden, dass ich einen Fehler beim nächsten Mal wieder mache. ] Um Ihnen die Beantwortung zu erleichtern, können Sie die Antwort in Prozent geben                | 149,78                                  | 1610,575                             | ,717                               | ,948                                   |
| [ Ich kann mein Vorgehen bei Schreibprojekten durch Erfahrung verbessern. ] Um Ihnen die Beantwortung zu erleichtern, können Sie die Antwort in Prozent geben                  | 149,40                                  | 1617,743                             | ,659                               | ,949                                   |
| [ Ich kann einschätzen, was ich beim nächsten Mal anders machen muss. ] Um Ihnen die Beantwortung zu erleichtern, können Sie die Antwort in Prozent geben                      | 149,91                                  | 1634,033                             | ,621                               | ,949                                   |

Skala-Statistiken

| Mittelwert | Varianz  | Standardabweichung | Anzahl der Items |
|------------|----------|--------------------|------------------|
| 157,37     | 1766,602 | 42,031             | 22               |

\*\*\*\*\*SWRSRS\_PRÄ\*\*\*\*\*

\*Skalenbildung SWRSRS\_PRÄ\*

COMPUTE SWRSRS\_PRÄ\_22=MEAN(SWRSRS\_PRÄ\_aa\_2, SWRSRS\_PRÄ\_aa\_6, SWRSRS\_PRÄ\_sm\_1, SWRSRS\_PRÄ\_sm\_3,



```
SWSRS_prä_sm_7, SWSRS_prä_sm_8).  
EXECUTE.
```

```
*Reliabilität SWSRS_PRÄ*
```

```
RELIABILITY  
/VARIABLES=SWSRS_prä_aa_2, SWSRS_prä_aa_6, SWSRS_prä_sm_1, SWSRS_prä_sm_3,  
SWSRS_prä_sm_7, SWSRS_prä_sm_8  
/SCALE('SWSRS_PRÄ_22') ALL  
/MODEL=ALPHA  
/STATISTICS=DESCRIPTIVE SCALE  
/SUMMARY=TOTAL.
```

## Reliabilität

### Skala: SWSRS\_PRÄ\_22

#### Zusammenfassung der Fallverarbeitung

|                             | N   | %     |
|-----------------------------|-----|-------|
| Fälle Gültig                | 121 | 100,0 |
| Ausgeschlossen <sup>a</sup> | 0   | ,0    |
| Gesamt                      | 121 | 100,0 |

a. Listenweise Löschung auf der Grundlage aller Variablen in der Prozedur.

#### Reliabilitätsstatistiken

|                 |                  |
|-----------------|------------------|
| Cronbachs Alpha | Anzahl der Items |
| ,789            | 6                |

Itemstatistiken

|                                                                                                                                                                                    | Mittelwert | Standardabweichung | N   |
|------------------------------------------------------------------------------------------------------------------------------------------------------------------------------------|------------|--------------------|-----|
| <input type="checkbox"/> Ich kann mir konkrete Schreibziele setzen. ] Um Ihnen die Beantwortung zu erleichtern, können Sie die Antwort in Prozent geben                            | 7,05       | 2,866              | 121 |
| <input type="checkbox"/> Ich kann meine Ideen auch bei einem komplexen Thema gut organisieren. ] Um Ihnen die Beantwortung zu erleichtern, können Sie die Antwort in Prozent geben | 7,17       | 2,502              | 121 |
| <input type="checkbox"/> Ich kann mich dazu motivieren mit dem Schreiben anzufangen. ] Um Ihnen die Beantwortung zu erleichtern, können Sie die Antwort in Prozent geben           | 6,17       | 3,057              | 121 |
| <input type="checkbox"/> Ich kann Probleme, die beim Schreiben auftauchen, überwinden. ] Um Ihnen die Beantwortung zu erleichtern, können Sie die Antwort in Prozent geben         | 7,73       | 2,244              | 121 |
| <input type="checkbox"/> Ich kann Interesse für das Schreiben entwickeln. ] Um Ihnen die Beantwortung zu erleichtern, können Sie die Antwort in Prozent geben                      | 7,64       | 2,787              | 121 |
| <input type="checkbox"/> Ich kann leicht Wege finden mein Interesse am Schreiben zu steigern. ] Um Ihnen die Beantwortung zu erleichtern, können Sie die Antwort in Prozent geben  | 5,87       | 2,735              | 121 |

Item-Skala-Statistiken

|                                                                                                                                                             | Skalenmittelwert, wenn Item weggelassen | Skalenvarianz, wenn Item weggelassen | Korrigierte Item-Skala-Korrelation | Cronbachs Alpha, wenn Item weggelassen |
|-------------------------------------------------------------------------------------------------------------------------------------------------------------|-----------------------------------------|--------------------------------------|------------------------------------|----------------------------------------|
| [ Ich kann mir konkrete Schreibziele setzen. ] Um Ihnen die Beantwortung zu erleichtern, können Sie die Antwort in Prozent geben                            | 34,58                                   | 92,079                               | ,516                               | ,763                                   |
| [ Ich kann meine Ideen auch bei einem komplexen Thema gut organisieren. ] Um Ihnen die Beantwortung zu erleichtern, können Sie die Antwort in Prozent geben | 34,45                                   | 97,250                               | ,510                               | ,764                                   |
| [ Ich kann mich dazu motivieren mit dem Schreiben anzufangen. ] Um Ihnen die Beantwortung zu erleichtern, können Sie die Antwort in Prozent geben           | 35,45                                   | 92,267                               | ,461                               | ,779                                   |
| [ Ich kann Probleme, die beim Schreiben auftauchen, überwinden. ] Um Ihnen die Beantwortung zu erleichtern, können Sie die Antwort in Prozent geben         | 33,90                                   | 98,307                               | ,570                               | ,753                                   |
| [ Ich kann Interesse für das Schreiben entwickeln. ] Um Ihnen die Beantwortung zu erleichtern, können Sie die Antwort in Prozent geben                      | 33,99                                   | 90,758                               | ,568                               | ,750                                   |
| [ Ich kann leicht Wege finden mein Interesse am Schreiben zu steigern. ] Um Ihnen die Beantwortung zu erleichtern, können Sie die Antwort in Prozent geben  | 35,76                                   | 88,184                               | ,643                               | ,731                                   |

Skala-Statistiken

| Mittelwert | Varianz | Standardabweichung | Anzahl der Items |
|------------|---------|--------------------|------------------|
| 41,63      | 128,686 | 11,344             | 6                |

\*\*\*\*\*SWSRS\_AKT\*\*\*\*\*

\*Skalenbildung SWSRS\_AKT\*

COMPUTE SWSRS\_AKT\_22=MEAN(SWSRS\_akt\_sk\_1, SWSRS\_akt\_sk\_7,  
SWSRS\_akt\_sk\_15, SWSRS\_akt\_sk\_17, SWSRS\_akt\_sk\_19, SWSRS\_akt\_sb\_2, SWSRS\_akt\_sb\_4,  
SWSRS\_akt\_sb\_7, SWSRS\_akt\_sb\_9).

EXECUTE.

\*Reliabilität SWSRS\_AKT\*

```
RELIABILITY
/VARIABLES=SWSRS_akt_sk_1, SWSRS_akt_sk_7,
SWSRS_akt_sk_15, SWSRS_akt_sk_17, SWSRS_akt_sk_19, SWSRS_akt_sb_2, SWSRS_akt_sb_4,
SWSRS_akt_sb_7, SWSRS_akt_sb_9
/SCALE('SWSRS_AKT_22') ALL
/MODEL=ALPHA
/STATISTICS=DESCRIPTIVE SCALE
/SUMMARY=TOTAL.
```

## Reliabilität

### Skala: SWSRS\_AKT\_22

#### Zusammenfassung der Fallverarbeitung

|                             | N   | %     |
|-----------------------------|-----|-------|
| Fälle                       | 121 | 100,0 |
| Gültig                      |     |       |
| Ausgeschlossen <sup>a</sup> | 0   | ,0    |
| Gesamt                      | 121 | 100,0 |

a. Listenweise Löschung auf der Grundlage aller Variablen in der Prozedur.

#### Reliabilitätsstatistiken

|                 |                  |
|-----------------|------------------|
| Cronbachs Alpha | Anzahl der Items |
| ,910            | 9                |

Itemstatistiken

|                                                                                                                                                                                                           | Mittelwert | Standardabweichung | N   |
|-----------------------------------------------------------------------------------------------------------------------------------------------------------------------------------------------------------|------------|--------------------|-----|
| <input type="checkbox"/> Ich kann mein Vorgehen beim Schreiben überwachen. ] Um Ihnen die Beantwortung zu erleichtern, können Sie die Antwort in Prozent geben                                            | 6,28       | 2,829              | 121 |
| <input type="checkbox"/> Ich kann mich auf das Schreiben konzentrieren. ] Um Ihnen die Beantwortung zu erleichtern, können Sie die Antwort in Prozent geben                                               | 7,54       | 2,717              | 121 |
| <input type="checkbox"/> Ich kann meine Schreibzeit effektiv nutzen. ] Um Ihnen die Beantwortung zu erleichtern, können Sie die Antwort in Prozent geben                                                  | 6,56       | 2,834              | 121 |
| <input type="checkbox"/> Ich kann mir meine Zeit so einteilen, dass ich konzentriert an meinem Text arbeite. ] Um Ihnen die Beantwortung zu erleichtern, können Sie die Antwort in Prozent geben          | 6,67       | 2,879              | 121 |
| <input type="checkbox"/> Ich kann mir meinen Schreibplatz so gestalten, dass ich ungestört schreiben kann. ] Um Ihnen die Beantwortung zu erleichtern, können Sie die Antwort in Prozent geben            | 7,31       | 3,019              | 121 |
| <input type="checkbox"/> Ich kann mein Vorgehen beim Schreiben ändern, wenn ich merke, dass es nicht erfolgreich ist. ] Um Ihnen die Beantwortung zu erleichtern, können Sie die Antwort in Prozent geben | 7,12       | 2,762              | 121 |
| <input type="checkbox"/> Ich kann mein Vorankommen beim Schreiben nachvollziehen. ] Um Ihnen die Beantwortung zu erleichtern, können Sie die Antwort in Prozent geben                                     | 7,79       | 2,474              | 121 |
| <input type="checkbox"/> Ich kann ausdauernd an meinem Text arbeiten. ] Um Ihnen die Beantwortung zu erleichtern, können Sie die Antwort in Prozent geben                                                 | 7,32       | 2,905              | 121 |
| <input type="checkbox"/> Ich kann eine Schreibblockade lösen und danach weiterschreiben. ] Um Ihnen die Beantwortung zu erleichtern, können Sie die Antwort in Prozent geben                              | 6,40       | 2,651              | 121 |

Item-Skala-Statistiken

|                                                                                                                                                                                    | Skalennittelwert, wenn Item weggelassen | Skalenvarianz, wenn Item weggelassen | Korrigierte Item-Skala-Korrelation | Cronbachs Alpha, wenn Item weggelassen |
|------------------------------------------------------------------------------------------------------------------------------------------------------------------------------------|-----------------------------------------|--------------------------------------|------------------------------------|----------------------------------------|
| [ Ich kann mein Vorgehen beim Schreiben überwachen. ] Um Ihnen die Beantwortung zu erleichtern, können Sie die Antwort in Prozent geben                                            | 56,72                                   | 298,820                              | ,603                               | ,906                                   |
| [ Ich kann mich auf das Schreiben konzentrieren. ] Um Ihnen die Beantwortung zu erleichtern, können Sie die Antwort in Prozent geben                                               | 55,46                                   | 290,984                              | ,728                               | ,897                                   |
| [ Ich kann meine Schreibzeit effektiv nutzen. ] Um Ihnen die Beantwortung zu erleichtern, können Sie die Antwort in Prozent geben                                                  | 56,44                                   | 288,365                              | ,721                               | ,897                                   |
| [ Ich kann mir meine Zeit so einteilen, dass ich konzentriert an meinem Text arbeite. ] Um Ihnen die Beantwortung zu erleichtern, können Sie die Antwort in Prozent geben          | 56,33                                   | 283,973                              | ,758                               | ,894                                   |
| [ Ich kann mir meinen Schreibplatz so gestalten, dass ich ungestört schreiben kann. ] Um Ihnen die Beantwortung zu erleichtern, können Sie die Antwort in Prozent geben            | 55,69                                   | 292,651                              | ,620                               | ,905                                   |
| [ Ich kann mein Vorgehen beim Schreiben ändern, wenn ich merke, dass es nicht erfolgreich ist. ] Um Ihnen die Beantwortung zu erleichtern, können Sie die Antwort in Prozent geben | 55,88                                   | 289,293                              | ,733                               | ,896                                   |
| [ Ich kann mein Vorankommen beim Schreiben nachvollziehen. ] Um Ihnen die Beantwortung zu erleichtern, können Sie die Antwort in Prozent geben                                     | 55,21                                   | 298,320                              | ,718                               | ,898                                   |
| [ Ich kann ausdauernd an meinem Text arbeiten. ] Um Ihnen die Beantwortung zu erleichtern, können Sie die Antwort in Prozent geben                                                 | 55,68                                   | 286,937                              | ,716                               | ,898                                   |
| [ Ich kann eine Schreibblockade lösen und danach weiterschreiben. ] Um Ihnen die Beantwortung zu erleichtern, können Sie die Antwort in Prozent geben                              | 56,60                                   | 301,410                              | ,623                               | ,904                                   |

**Skala-Statistiken**

| Mittelwert | Varianz | Standardabweichung | Anzahl der Items |
|------------|---------|--------------------|------------------|
| 63,00      | 365,817 | 19,126             | 9                |

\*\*\*\*\*SWSRS\_POST\*\*\*\*\*

\*Skalenbildung SWSRS\_POST\*

```
COMPUTE SWSRS_POST_22=MEAN(SWSRS_post_sb_1, SWSRS_post_sb_3,
SWSRS_post_sb_4, SWSRS_post_sr_2, SWSRS_post_sr_4, SWSRS_post_sr_6, SWSRS_post_sr_7).
EXECUTE.
```

\*Reliabilität SWSRS\_POST\*

```
RELIABILITY
/VARIABLES=SWSRS_post_sb_1, SWSRS_post_sb_3,
SWSRS_post_sb_4, SWSRS_post_sr_2, SWSRS_post_sr_4, SWSRS_post_sr_6, SWSRS_post_sr_7
/SCALE('SWSRS_POST_22') ALL
/MODEL=ALPHA
/STATISTICS=DESCRIPTIVE SCALE
/SUMMARY=TOTAL.
```

**Reliabilität**

**Skala: SWSRS\_POST\_22**

**Zusammenfassung der Fallverarbeitung**

|                             | N   | %     |
|-----------------------------|-----|-------|
| Fälle Gültig                | 121 | 100,0 |
| Ausgeschlossen <sup>a</sup> | 0   | ,0    |
| Gesamt                      | 121 | 100,0 |

a. Listenweise Löschung auf der Grundlage aller Variablen in der Prozedur.

**Reliabilitätsstatistiken**

| Cronbachs Alpha | Anzahl der Items |
|-----------------|------------------|
| ,887            | 7                |

Itemstatistiken

|                                                                                                                                                                                | Mittelwert | Standardabweichung | N   |
|--------------------------------------------------------------------------------------------------------------------------------------------------------------------------------|------------|--------------------|-----|
| [ Ich kann die Qualität meines Textes realistisch einschätzen. ]<br>Um Ihnen die Beantwortung zu erleichtern, können Sie die Antwort in Prozent geben                          | 7,49       | 2,589              | 121 |
| [ Ich kann die von mir selbst gesetzten Kriterien für die Qualität meiner Texte erreichen. ] Um Ihnen die Beantwortung zu erleichtern, können Sie die Antwort in Prozent geben | 7,84       | 2,429              | 121 |
| [ Ich kann die von mir selbst gesetzten Teilziele beim Schreiben erreichen. ] Um Ihnen die Beantwortung zu erleichtern, können Sie die Antwort in Prozent geben                | 7,19       | 2,919              | 121 |
| [ Ich kann ein gutes Gefühl für das Vorankommen beim Schreiben entwickeln. ] Um Ihnen die Beantwortung zu erleichtern, können Sie die Antwort in Prozent geben                 | 7,20       | 2,747              | 121 |
| [ Ich kann vermeiden, dass ich einen Fehler beim nächsten Mal wieder mache. ] Um Ihnen die Beantwortung zu erleichtern, können Sie die Antwort in Prozent geben                | 7,60       | 2,594              | 121 |
| [ Ich kann mein Vorgehen bei Schreibprojekten durch Erfahrung verbessern. ] Um Ihnen die Beantwortung zu erleichtern, können Sie die Antwort in Prozent geben                  | 7,97       | 2,674              | 121 |
| [ Ich kann einschätzen, was ich beim nächsten Mal anders machen muss. ] Um Ihnen die Beantwortung zu erleichtern, können Sie die Antwort in Prozent geben                      | 7,46       | 2,513              | 121 |



Item-Skala-Statistiken

|                                                                                                                                                                                | Skalenmittelwert, wenn Item weggelassen | Skalenvarianz, wenn Item weggelassen | Korrigierte Item-Skala-Korrelation | Cronbachs Alpha, wenn Item weggelassen |
|--------------------------------------------------------------------------------------------------------------------------------------------------------------------------------|-----------------------------------------|--------------------------------------|------------------------------------|----------------------------------------|
| [ Ich kann die Qualität meines Textes realistisch einschätzen. ]<br>Um Ihnen die Beantwortung zu erleichtern, können Sie die Antwort in Prozent geben                          | 45,26                                   | 157,792                              | ,607                               | ,879                                   |
| [ Ich kann die von mir selbst gesetzten Kriterien für die Qualität meiner Texte erreichen. ] Um Ihnen die Beantwortung zu erleichtern, können Sie die Antwort in Prozent geben | 44,90                                   | 156,457                              | ,685                               | ,871                                   |
| [ Ich kann die von mir selbst gesetzten Teilziele beim Schreiben erreichen. ] Um Ihnen die Beantwortung zu erleichtern, können Sie die Antwort in Prozent geben                | 45,55                                   | 148,149                              | ,666                               | ,873                                   |
| [ Ich kann ein gutes Gefühl für das Vorankommen beim Schreiben entwickeln. ] Um Ihnen die Beantwortung zu erleichtern, können Sie die Antwort in Prozent geben                 | 45,55                                   | 147,350                              | ,736                               | ,864                                   |
| [ Ich kann vermeiden, dass ich einen Fehler beim nächsten Mal wieder mache. ] Um Ihnen die Beantwortung zu erleichtern, können Sie die Antwort in Prozent geben                | 45,15                                   | 149,744                              | ,748                               | ,862                                   |
| [ Ich kann mein Vorgehen bei Schreibprojekten durch Erfahrung verbessern. ] Um Ihnen die Beantwortung zu erleichtern, können Sie die Antwort in Prozent geben                  | 44,78                                   | 151,725                              | ,685                               | ,870                                   |
| [ Ich kann einschätzen, was ich beim nächsten Mal anders machen muss. ] Um Ihnen die Beantwortung zu erleichtern, können Sie die Antwort in Prozent geben                      | 45,28                                   | 157,520                              | ,636                               | ,876                                   |

Skala-Statistiken

| Mittelwert | Varianz | Standardabweichung | Anzahl der Items |
|------------|---------|--------------------|------------------|
| 52,74      | 203,975 | 14,282             | 7                |

\*\*\*\*\*Skalenbildung und Reliabilitäten\*\*\*\*\*

\*Skalenbildung ASW\*

```
COMPUTE ASW=MEAN(ASW_1, ASW_2, ASW_3, ASW_4, ASW_5, ASW_6, ASW_7, ASW_8, ASW_9, ASW_10).  
EXECUTE.
```

\*Reliabilität ASW\*

```
RELIABILITY  
/VARIABLES=ASW_1 ASW_2 ASW_3 ASW_4 ASW_5 ASW_6 ASW_7 ASW_8 ASW_9 ASW_10  
/SCALE('ASW') ALL  
/MODEL=ALPHA  
/STATISTICS=DESCRIPTIVE SCALE  
/SUMMARY=TOTAL.
```

### Reliabilität

### Skala: ASW

#### Zusammenfassung der Fallverarbeitung

|                             | N   | %     |
|-----------------------------|-----|-------|
| Fälle Gültig                | 121 | 100,0 |
| Ausgeschlossen <sup>a</sup> | 0   | ,0    |
| Gesamt                      | 121 | 100,0 |

a. Listenweise Löschung auf der Grundlage aller Variablen in der Prozedur.

#### Reliabilitätsstatistiken

|                 |                  |
|-----------------|------------------|
| Cronbachs Alpha | Anzahl der Items |
| .839            | 10               |

Itemstatistiken

|                                                                                                                                                                  | Mittelwert | Standardabweichung | N   |
|------------------------------------------------------------------------------------------------------------------------------------------------------------------|------------|--------------------|-----|
| [ Wenn sich Widerstände auf tun, finde ich Mittel und Wege, mich durchzusetzen.] Inwiefern treffen die folgenden Aussagen auf Sie persönlich zu?                 | 2,97       | ,632               | 121 |
| [ Die Lösung schwieriger Probleme gelingt mir immer, wenn ich mich darum bemühe.] Inwiefern treffen die folgenden Aussagen auf Sie persönlich zu?                | 3,13       | ,577               | 121 |
| [ Es bereitet mir keine Schwierigkeiten, meine Absichten und Ziele zu verwirklichen.] Inwiefern treffen die folgenden Aussagen auf Sie persönlich zu?            | 2,76       | ,742               | 121 |
| [ In unerwarteten Situationen weiß ich immer, wie ich mich verhalten soll.] Inwiefern treffen die folgenden Aussagen auf Sie persönlich zu?                      | 2,41       | ,691               | 121 |
| [ Auch bei überraschenden Ereignissen glaube ich, dass ich gut mit ihnen zurechtkommen kann.] Inwiefern treffen die folgenden Aussagen auf Sie persönlich zu?    | 2,93       | ,692               | 121 |
| [ Schwierigkeiten sehe ich gelassen entgegen, weil ich meinen Fähigkeiten immer vertrauen kann.] Inwiefern treffen die folgenden Aussagen auf Sie persönlich zu? | 2,73       | ,775               | 121 |
| [ Was auch immer passiert, ich werde schon klarkommen.] Inwiefern treffen die folgenden Aussagen auf Sie persönlich zu?                                          | 3,29       | ,724               | 121 |
| [ Für jedes Problem kann ich eine Lösung finden.] Inwiefern treffen die folgenden Aussagen auf Sie persönlich zu?                                                | 3,00       | ,764               | 121 |
| [ Wenn eine neue Sache auf mich zukommt, weiß ich, wie ich damit umgehen kann.] Inwiefern treffen die folgenden Aussagen auf Sie persönlich zu?                  | 2,69       | ,684               | 121 |
| [ Wenn ein Problem auftaucht, kann ich es aus eigener Kraft meistern.] Inwiefern treffen die folgenden Aussagen auf Sie persönlich zu?                           | 3,03       | ,591               | 121 |

Item-Skala-Statistiken

|                                                                                                                                                                  | Skalenmittelwert, wenn Item weggelassen | Skalenvarianz, wenn Item weggelassen | Korrigierte Item-Skala-Korrelation | Cronbachs Alpha, wenn Item weggelassen |
|------------------------------------------------------------------------------------------------------------------------------------------------------------------|-----------------------------------------|--------------------------------------|------------------------------------|----------------------------------------|
| [ Wenn sich Widerstände auftun, finde ich Mittel und Wege, mich durchzusetzen.] Inwiefern treffen die folgenden Aussagen auf Sie persönlich zu?                  | 25,98                                   | 16,691                               | ,458                               | ,831                                   |
| [ Die Lösung schwieriger Probleme gelingt mir immer, wenn ich mich darum bemühe.] Inwiefern treffen die folgenden Aussagen auf Sie persönlich zu?                | 25,81                                   | 17,022                               | ,442                               | ,832                                   |
| [ Es bereitet mir keine Schwierigkeiten, meine Absichten und Ziele zu verwirklichen.] Inwiefern treffen die folgenden Aussagen auf Sie persönlich zu?            | 26,18                                   | 16,117                               | ,468                               | ,831                                   |
| [ In unerwarteten Situationen weiß ich immer, wie ich mich verhalten soll.] Inwiefern treffen die folgenden Aussagen auf Sie persönlich zu?                      | 26,53                                   | 16,151                               | ,509                               | ,827                                   |
| [ Auch bei überraschenden Ereignissen glaube ich, dass ich gut mit ihnen zurecht kommen kann.] Inwiefern treffen die folgenden Aussagen auf Sie persönlich zu?   | 26,01                                   | 15,808                               | ,576                               | ,820                                   |
| [ Schwierigkeiten sehe ich gelassen entgegen, weil ich meinen Fähigkeiten immer vertrauen kann.] Inwiefern treffen die folgenden Aussagen auf Sie persönlich zu? | 26,21                                   | 15,187                               | ,608                               | ,817                                   |
| [ Was auch immer passiert, ich werde schon klarkommen.] Inwiefern treffen die folgenden Aussagen auf Sie persönlich zu?                                          | 25,65                                   | 15,662                               | ,571                               | ,821                                   |
| [ Für jedes Problem kann ich eine Lösung finden.] Inwiefern treffen die folgenden Aussagen auf Sie persönlich zu?                                                | 25,94                                   | 15,522                               | ,557                               | ,822                                   |

Item-Skala-Statistiken

|                                                                                                                                                 | Skalenmittelwert, wenn Item weggelassen | Skalenvarianz, wenn Item weggelassen | Korrigierte Item-Skala-Korrelation | Cronbachs Alpha, wenn Item weggelassen |
|-------------------------------------------------------------------------------------------------------------------------------------------------|-----------------------------------------|--------------------------------------|------------------------------------|----------------------------------------|
| [ Wenn eine neue Sache auf mich zukommt, weiß ich, wie ich damit umgehen kann.] Inwiefern treffen die folgenden Aussagen auf Sie persönlich zu? | 26,26                                   | 15,992                               | ,548                               | ,823                                   |
| [ Wenn ein Problem auftaucht, kann ich es aus eigener Kraft meistern.] Inwiefern treffen die folgenden Aussagen auf Sie persönlich zu?          | 25,91                                   | 16,250                               | ,600                               | ,819                                   |

Skala-Statistiken

| Mittelwert | Varianz | Standardabweichung | Anzahl der Items |
|------------|---------|--------------------|------------------|
| 28,94      | 19,455  | 4,411              | 10               |

\*Skalenbildung REG\*

\*umkodierte Variablen\*

```
RECODE REG_5 (1=4) (2=3) (3=2) (4=1) INTO REG_5_i.
VARIABLE LABELS REG_5_i 'REG_5_i'.
EXECUTE.
```

```
RECODE REG_7 (1=4) (2=3) (3=2) (4=1) INTO REG_7_i.
VARIABLE LABELS REG_7_i 'REG_7_i'.
EXECUTE.
```

```
RECODE REG_9 (1=4) (2=3) (3=2) (4=1) INTO REG_9_i.
VARIABLE LABELS REG_9_i 'REG_9_i'.
EXECUTE.
```

```
COMPUTE REG=MEAN(REG_1, REG_2, REG_3, REG_4, REG_5_i, REG_6, REG_7_i, REG_8, REG_9_i, REG_10).
EXECUTE.
```

\*Reliabilität REG\*

```
RELIABILITY
/VARIABLES=REG_1 REG_2 REG_3 REG_4 REG_5_i REG_6 REG_7_i REG_8 REG_9_i REG_10
/SCALE('REG') ALL
/MODEL=ALPHA
/STATISTICS=DESCRIPTIVE SCALE
/SUMMARY=TOTAL.
```

## Reliabilität

### Skala: REG

#### Zusammenfassung der Fallverarbeitung

|                             | N   | %     |
|-----------------------------|-----|-------|
| Fälle Gültig                | 120 | 99,2  |
| Ausgeschlossen <sup>a</sup> | 1   | ,8    |
| Gesamt                      | 121 | 100,0 |

a. Listenweise Löschung auf der Grundlage aller Variablen in der Prozedur.

#### Reliabilitätsstatistiken

|                 |                  |
|-----------------|------------------|
| Cronbachs Alpha | Anzahl der Items |
| ,811            | 10               |

#### Itemstatistiken

|                                                                                                                                                                                         | Mittelwert | Standardabweichung | N   |
|-----------------------------------------------------------------------------------------------------------------------------------------------------------------------------------------|------------|--------------------|-----|
| [ Ich kann mich lange Zeit auf eine Sache konzentrieren, wenn es nötig ist.] Inwiefern treffen die folgenden Aussagen auf Sie persönlich zu?                                            | 3,0250     | ,87411             | 120 |
| [ Wenn ich von einer Sache abgelenkt werde, komme ich schnell wieder zum Thema zurück.] Inwiefern treffen die folgenden Aussagen auf Sie persönlich zu?                                 | 2,7000     | ,71714             | 120 |
| [ Wenn ich bei einer Tätigkeit zu aufgeregt werde, kann ich mich so beruhigen, dass ich bald wieder weitermachen kann.] Inwiefern treffen die folgenden Aussagen auf Sie persönlich zu? | 2,5750     | ,80610             | 120 |
| [ Wenn bei einer Tätigkeit eine sachliche Haltung nötig ist, kann ich meine Gefühle unter Kontrolle bringen.] Inwiefern treffen die folgenden Aussagen auf Sie persönlich zu?           | 3,0250     | ,79349             | 120 |

**Itemstatistiken**

|                                                                                                                                                                          | Mittelwert | Standardabweichung | N   |
|--------------------------------------------------------------------------------------------------------------------------------------------------------------------------|------------|--------------------|-----|
| REG_5_i<br>[ Ich kann es verhindern, dass die Gedanken ständig von meiner Aufgabe abschweifen.] Inwiefern treffen die folgenden Aussagen auf Sie persönlich zu?          | 2,2833     | ,80108             | 120 |
| REG_7_i<br>[ Nach einer Unterbrechung finde ich problemlos zu einer konzentrierten Arbeitsweise zurück.] Inwiefern treffen die folgenden Aussagen auf Sie persönlich zu? | 2,4167     | ,76239             | 120 |
| REG_9_i<br>[ Ich behalte mein Ziel im Auge und lasse mich nicht vom Weg abbringen.] Inwiefern treffen die folgenden Aussagen auf Sie persönlich zu?                      | 2,1417     | ,81267             | 120 |
|                                                                                                                                                                          | 2,7333     | ,75296             | 120 |
|                                                                                                                                                                          | 2,5667     | ,86708             | 120 |
|                                                                                                                                                                          | 2,9583     | ,73788             | 120 |

**Item-Skala-Statistiken**

|                                                                                                                                                                                         | Skalenmittelwert, wenn Item weggelassen | Skalenvarianz, wenn Item weggelassen | Korrigierte Item-Skala-Korrelation | Cronbachs Alpha, wenn Item weggelassen |
|-----------------------------------------------------------------------------------------------------------------------------------------------------------------------------------------|-----------------------------------------|--------------------------------------|------------------------------------|----------------------------------------|
| [ Ich kann mich lange Zeit auf eine Sache konzentrieren, wenn es nötig ist.] Inwiefern treffen die folgenden Aussagen auf Sie persönlich zu?                                            | 23,4000                                 | 18,713                               | ,508                               | ,792                                   |
| [ Wenn ich von einer Sache abgelenkt werde, komme ich schnell wieder zum Thema zurück.] Inwiefern treffen die folgenden Aussagen auf Sie persönlich zu?                                 | 23,7250                                 | 19,378                               | ,543                               | ,789                                   |
| [ Wenn ich bei einer Tätigkeit zu aufgeregt werde, kann ich mich so beruhigen, dass ich bald wieder weitermachen kann.] Inwiefern treffen die folgenden Aussagen auf Sie persönlich zu? | 23,8500                                 | 19,860                               | ,391                               | ,805                                   |
| [ Wenn bei einer Tätigkeit eine sachliche Haltung nötig ist, kann ich meine Gefühle unter Kontrolle bringen.] Inwiefern treffen die folgenden Aussagen auf Sie persönlich zu?           | 23,4000                                 | 21,166                               | ,209                               | ,823                                   |

**Item-Skala-Statistiken**

|                                                                                                                                                                          | Skalenmittelwert, wenn Item weggelassen | Skalenvarianz, wenn Item weggelassen | Korrigierte Item-Skala-Korrelation | Cronbachs Alpha, wenn Item weggelassen |
|--------------------------------------------------------------------------------------------------------------------------------------------------------------------------|-----------------------------------------|--------------------------------------|------------------------------------|----------------------------------------|
| REG_5_j<br>[ Ich kann es verhindern, dass die Gedanken ständig von meiner Aufgabe abschweifen.] Inwiefern treffen die folgenden Aussagen auf Sie persönlich zu?          | 24,1417                                 | 18,476                               | ,611                               | ,780                                   |
| REG_7_j<br>[ Nach einer Unterbrechung finde ich problemlos zu einer konzentrierten Arbeitsweise zurück.] Inwiefern treffen die folgenden Aussagen auf Sie persönlich zu? | 24,2833                                 | 19,869                               | ,386                               | ,805                                   |
| REG_9_j<br>[ Ich behalte mein Ziel im Auge und lasse mich nicht vom Weg abbringen.] Inwiefern treffen die folgenden Aussagen auf Sie persönlich zu?                      | 23,6917                                 | 19,106                               | ,554                               | ,787                                   |
|                                                                                                                                                                          | 23,8583                                 | 18,022                               | ,618                               | ,778                                   |
|                                                                                                                                                                          | 23,4667                                 | 19,864                               | ,443                               | ,799                                   |

**Skala-Statistiken**

| Mittelwert | Varianz | Standardabweichung | Anzahl der Items |
|------------|---------|--------------------|------------------|
| 26,4250    | 23,322  | 4,82929            | 10               |

\*\*\*\*\*Korrelationen\*\*\*\*\*

\*Korrelationen SWSRS\_22 und ASW\*

CORRELATIONS

/VARIABLES=SWSRS\_22 SWSRS\_PRA\_22 SWSRS\_AKT\_22 SWSRS\_POST\_22 ASW

/PRINT=TWOTAIL NOSIG

/MISSING=PAIRWISE.

**Korrelationen**



Korrelationen

|                          | SWSRS_22 | SWSRS_PRA_22 | SWSRS_AKT_22 | SWSRS_POST_22 | ASW    |
|--------------------------|----------|--------------|--------------|---------------|--------|
| SWSRS_22                 | 1        | ,887**       | ,968**       | ,942**        | ,421** |
| Korrelation nach Pearson |          | ,000         | ,000         | ,000          | ,000   |
| Signifikanz (2-seitig)   |          | 121          | 121          | 121           | 121    |
| N                        | 121      | 121          | 121          | 121           | 121    |
| SWSRS_PRA_22             | ,887**   | 1            | ,795**       | ,751**        | ,319** |
| Korrelation nach Pearson | ,000     |              | ,000         | ,000          | ,000   |
| Signifikanz (2-seitig)   | 121      | 121          | 121          | 121           | 121    |
| N                        | 121      | 121          | 121          | 121           | 121    |
| SWSRS_AKT_22             | ,968**   | ,795**       | 1            | ,878**        | ,411** |
| Korrelation nach Pearson | ,000     | ,000         |              | ,000          | ,000   |
| Signifikanz (2-seitig)   | 121      | 121          | 121          | 121           | 121    |
| N                        | 121      | 121          | 121          | 121           | 121    |
| SWSRS_POST_22            | ,942**   | ,751**       | ,878**       | 1             | ,434** |
| Korrelation nach Pearson | ,000     | ,000         | ,000         |               | ,000   |
| Signifikanz (2-seitig)   | 121      | 121          | 121          | 121           | 121    |
| N                        | 121      | 121          | 121          | 121           | 121    |
| ASW                      | ,421**   | ,319**       | ,411**       | ,434**        | 1      |
| Korrelation nach Pearson | ,000     | ,000         | ,000         | ,000          |        |
| Signifikanz (2-seitig)   | 121      | 121          | 121          | 121           | 121    |
| N                        | 121      | 121          | 121          | 121           | 121    |

\*\* . Die Korrelation ist auf dem Niveau von 0,01 (2-seitig) signifikant.

\*Korrelationen SWSRS\_22 und REG\*

CORRELATIONS

/VARIABLES=SWSRS\_22 SWSRS\_PRA\_22 SWSRS\_AKT\_22 SWSRS\_POST\_22 REG

/PRINT=TWOTAIL NOSIG

/MISSING=PAIRWISE.

Korrelationen

Korrelationen

|                                                    | SWSRS_22 | SWSRS_PRA_22 | SWSRS_AKT_22 | SWSRS_POST_22 | REG    |
|----------------------------------------------------|----------|--------------|--------------|---------------|--------|
| SWSRS_22                                           | 1        | ,887**       | ,968**       | ,942**        | ,595** |
| Korrelation nach Pearson<br>Signifikanz (2-seitig) |          | ,000         | ,000         | ,000          | ,000   |
| N                                                  | 121      | 121          | 121          | 121           | 120    |
| SWSRS_PRA_22                                       | ,887**   | 1            | ,795**       | ,751**        | ,470** |
| Korrelation nach Pearson<br>Signifikanz (2-seitig) | ,000     |              | ,000         | ,000          | ,000   |
| N                                                  | 121      | 121          | 121          | 121           | 120    |
| SWSRS_AKT_22                                       | ,968**   | ,795**       | 1            | ,878**        | ,622** |
| Korrelation nach Pearson<br>Signifikanz (2-seitig) | ,000     | ,000         |              | ,000          | ,000   |
| N                                                  | 121      | 121          | 121          | 121           | 120    |
| SWSRS_POST_22                                      | ,942**   | ,751**       | ,878**       | 1             | ,545** |
| Korrelation nach Pearson<br>Signifikanz (2-seitig) | ,000     | ,000         | ,000         |               | ,000   |
| N                                                  | 121      | 121          | 121          | 121           | 120    |
| REG                                                | ,595**   | ,470**       | ,622**       | ,545**        | 1      |
| Korrelation nach Pearson<br>Signifikanz (2-seitig) | ,000     | ,000         | ,000         | ,000          |        |
| N                                                  | 120      | 120          | 120          | 120           | 120    |

\*\* . Die Korrelation ist auf dem Niveau von 0,01 (2-seitig) signifikant.
