# Supplementary material for: Assessing Self-Efficacy for Self-Regulation of Academic Writing
Source: Atypon-hosted journal article supplement (doi:10.1027/1015-5759/a000452), 2018-03-29
Supplement: 1015-5759_a000452_esm3.pdf [file 1015-5759_a000452_esm3.pdf]

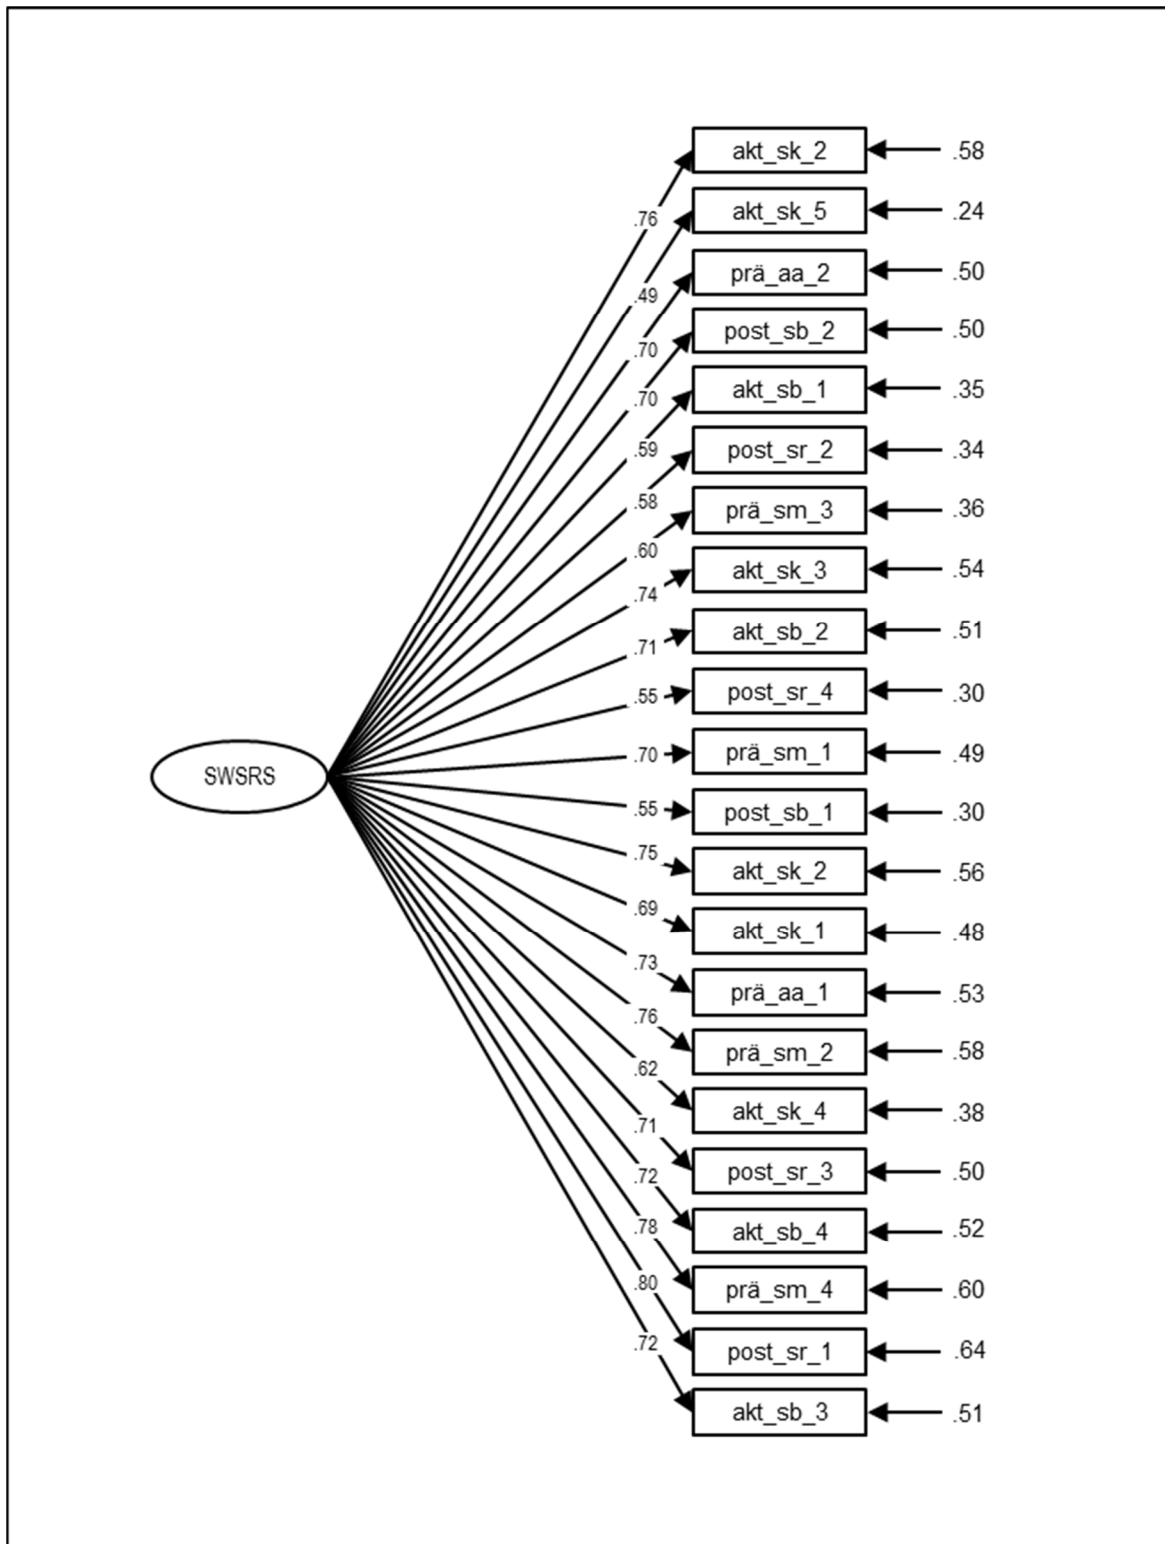

Supplementary Figure 1. Structural equation model representing the one-dimensional model of the SSAW scale ( $\chi^2/df = 6.543$ , CFI = .865, RMSEA = .092, and SRMR = .05).

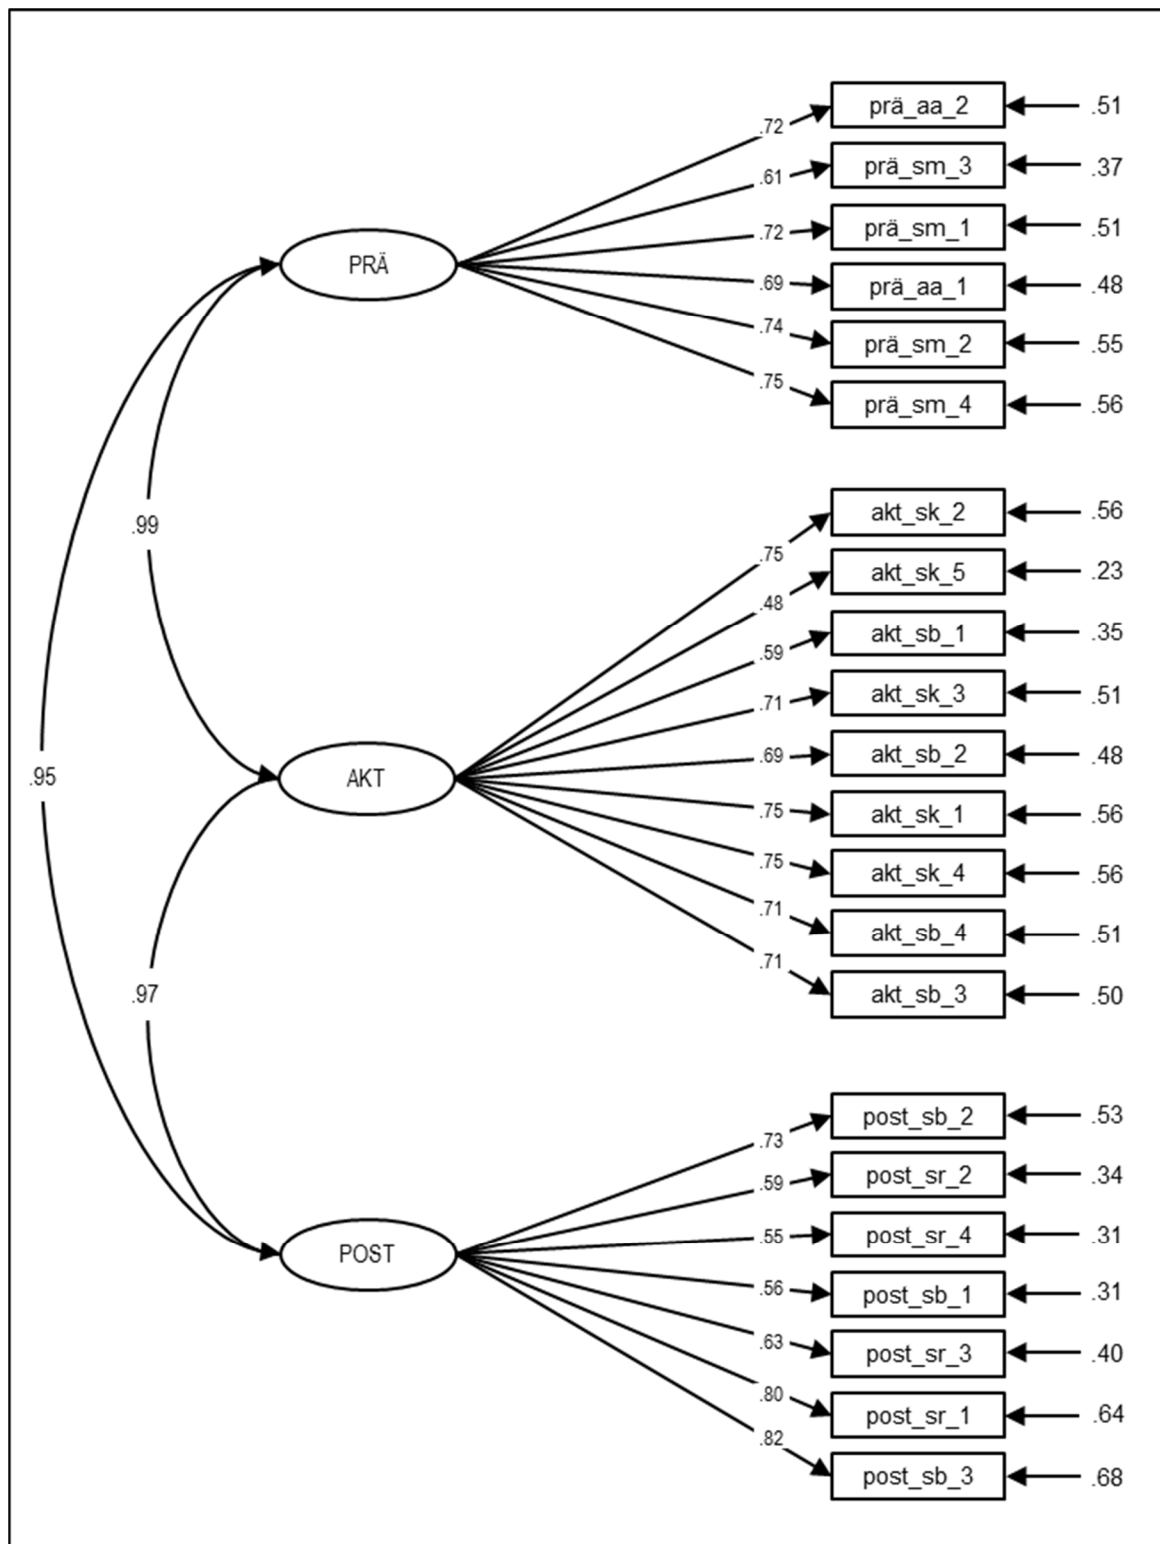

Supplementary Figure 2. Structural equation model showing three latent factors representing the three subscales of the SSAW scale ( $\chi^2/df = 5.155$ , CFI = .905, RMSEA = .079, and SRMR = .045). PRÄ is the forethought subscale, AKT is the performance subscale, and POST is the self-reflection subscale of the SSAW.
