# Supplementary material for: Assessing Self-Efficacy for Self-Regulation of Academic Writing
Source: Atypon-hosted journal article supplement (doi:10.1027/1015-5759/a000452), 2018-03-29
Supplement: 1015-5759_a000452_esm4.pdf [file 1015-5759_a000452_esm4.pdf]

### Study 3: Convergent Validity

The goal of the third study was to investigate the scale's convergent validity.

Table 1

*Abbreviations for the Scales and Subscales Used in Syntaxes (Study 3)*

| Abbreviation         | Description                                                                                                      |
|----------------------|------------------------------------------------------------------------------------------------------------------|
| SWSRS                | Abbreviation used in German for SSAW                                                                             |
| SWSRS_prä            | Item of the SSAW scale constructed with regard to the forethought phase                                          |
| SWSRS_akt            | Item of the SSAW scale constructed with regard to the performance phase                                          |
| SWSRS_post           | Item of the SSAW scale constructed with regard to the self-reflection phase                                      |
| SWSRS_prä_aa/sm/etc. | Lower case letters following the indicator of a phase represent a major category comprised in the distinct phase |
| SWSRS_PRÄ_22         | Forethought subscale of the SSAW scale                                                                           |
| SWSRS_AKT_22         | Performance subscale of the SSAW scale                                                                           |
| SWSRS_POST_22        | Self-reflection subscale of the SSAW scale                                                                       |
| ASW                  | Abbreviation for the General Self-Efficacy Scale (GSE)                                                           |
| REG                  | Abbreviation for the Self-Regulation Scale                                                                       |
| SW_S                 | Abbreviation for the Academic Self-Efficacy Scale                                                                |
| SWSRL                | Abbreviation for the Self-Efficacy for Self-Regulated Learning Scale                                             |

## SPSS-Syntax for Computing the Scales

### \*Skalenbildung SWSRS\*

```
COMPUTE SWSRS_22=MEAN(SWSRS_pra_aa_1, SWSRS_pra_aa_2, SWSRS_pra_sm_1,
SWSRS_pra_sm_2, SWSRS_pra_sm_3, SWSRS_pra_sm_4, SWSRS_akt_sk_1,
SWSRS_akt_sk_2, SWSRS_akt_sk_3, SWSRS_akt_sk_4, SWSRS_akt_sk_5,
SWSRS_akt_sb_1, SWSRS_akt_sb_2, SWSRS_akt_sb_3, SWSRS_akt_sb_4,
SWSRS_post_sb_1, SWSRS_post_sb_2, SWSRS_post_sb_3, SWSRS_post_sr_1,
SWSRS_post_sr_2, SWSRS_post_sr_3, SWSRS_post_sr_4).
EXECUTE.
```

### \*Reliabilität SWSRS\*

#### RELIABILITY

```
/VARIABLES=SWSRS_pra_aa_1, SWSRS_pra_aa_2, SWSRS_pra_sm_1,
SWSRS_pra_sm_2, SWSRS_pra_sm_3, SWSRS_pra_sm_4, SWSRS_akt_sk_1,
SWSRS_akt_sk_2, SWSRS_akt_sk_3, SWSRS_akt_sk_4, SWSRS_akt_sk_5,
SWSRS_akt_sb_1, SWSRS_akt_sb_2, SWSRS_akt_sb_3, SWSRS_akt_sb_4,
SWSRS_post_sb_1, SWSRS_post_sb_2, SWSRS_post_sb_3, SWSRS_post_sr_1,
SWSRS_post_sr_2, SWSRS_post_sr_3, SWSRS_post_sr_4
/SCALE('SWSRS_22') ALL
/MODEL=ALPHA
/STATISTICS=DESCRIPTIVE SCALE
/SUMMARY=TOTAL.
```

### \*Skalenbildung SWSRS\_PRÄ\*

```
COMPUTE SWSRS_PRA_22=MEAN(SWSRS_pra_aa_1, SWSRS_pra_aa_2,
SWSRS_pra_sm_1, SWSRS_pra_sm_2, SWSRS_pra_sm_3, SWSRS_pra_sm_4).
EXECUTE.
```

### \*Reliabilität SWSRS\_PRÄ\*

#### RELIABILITY

```
/VARIABLES=SWSRS_pra_aa_1, SWSRS_pra_aa_2, SWSRS_pra_sm_1,
SWSRS_pra_sm_2, SWSRS_pra_sm_3, SWSRS_pra_sm_4
/SCALE('SWSRS_PRA_22') ALL
/MODEL=ALPHA
/STATISTICS=DESCRIPTIVE SCALE
/SUMMARY=TOTAL.
```

### \*Skalenbildung SWSRS\_AKT\*

```
COMPUTE SWSRS_AKT_22=MEAN(SWSRS_akt_sk_1, SWSRS_akt_sk_2,
SWSRS_akt_sk_3, SWSRS_akt_sk_4, SWSRS_akt_sk_5, SWSRS_akt_sb_1,
SWSRS_akt_sb_2, SWSRS_akt_sb_3, SWSRS_akt_sb_4).
EXECUTE.
```

\*Reliabilität SWSRS\_AKT\*

RELIABILITY

```
/VARIABLES=SWSRS_akt_sk_1, SWSRS_akt_sk_2,  
SWSRS_akt_sk_3, SWSRS_akt_sk_4, SWSRS_akt_sk_5, SWSRS_akt_sb_1,  
SWSRS_akt_sb_2, SWSRS_akt_sb_3, SWSRS_akt_sb_4  
/SCALE('SWSRS_AKT_22') ALL  
/MODEL=ALPHA  
/STATISTICS=DESCRIPTIVE SCALE  
/SUMMARY=TOTAL.
```

\*Skalenbildung SWSRS\_POST\*

```
COMPUTE SWSRS_POST_22=MEAN(SWSRS_post_sb_1, SWSRS_post_sb_2,  
SWSRS_post_sb_3, SWSRS_post_sr_1, SWSRS_post_sr_2, SWSRS_post_sr_3,  
SWSRS_post_sr_4).  
EXECUTE.
```

\*Reliabilität SWSRS\_POST\*

RELIABILITY

```
/VARIABLES=SWSRS_post_sb_1, SWSRS_post_sb_2, SWSRS_post_sb_3,  
SWSRS_post_sr_1, SWSRS_post_sr_2, SWSRS_post_sr_3, SWSRS_post_sr_4  
/SCALE('SWSRS_POST_22') ALL  
/MODEL=ALPHA  
/STATISTICS=DESCRIPTIVE SCALE  
/SUMMARY=TOTAL.
```

\*Skalenbildung ASW\*

```
COMPUTE ASW=MEAN(ASW_1, ASW_2, ASW_3, ASW_4, ASW_5, ASW_6, ASW_7,  
ASW_8, ASW_9, ASW_10).  
EXECUTE.
```

\*Reliabilität ASW\*

RELIABILITY

```
/VARIABLES=ASW_1 ASW_2 ASW_3 ASW_4 ASW_5 ASW_6 ASW_7 ASW_8  
ASW_9 ASW_10  
/SCALE('ASW') ALL  
/MODEL=ALPHA  
/STATISTICS=DESCRIPTIVE SCALE  
/SUMMARY=TOTAL.
```

\*Skalenbildung REG\*  
\*umkodierte Variablen\*

```
RECODE REG_5 (1=4) (2=3) (3=2) (4=1) INTO REG_5_i.  
VARIABLE LABELS REG_5_i 'REG_5_i'.  
EXECUTE.
```

```
RECODE REG_7 (1=4) (2=3) (3=2) (4=1) INTO REG_7_i.  
VARIABLE LABELS REG_7_i 'REG_7_i'.  
EXECUTE.
```

```
RECODE REG_9 (1=4) (2=3) (3=2) (4=1) INTO REG_9_i.  
VARIABLE LABELS REG_9_i 'REG_9_i'.  
EXECUTE.
```

```
COMPUTE REG=MEAN(REG_1, REG_2, REG_3, REG_4, REG_5_i, REG_6, REG_7_i,  
REG_8, REG_9_i, REG_10).  
EXECUTE.
```

\*Reliabilität REG\*

```
RELIABILITY  
/VARIABLES=REG_1 REG_2 REG_3 REG_4 REG_5_i REG_6 REG_7_i REG_8  
REG_9_i REG_10  
/SCALE('REG') ALL  
/MODEL=ALPHA  
/STATISTICS=DESCRIPTIVE SCALE  
/SUMMARY=TOTAL.
```

\*Skalenbildung SW\_S\*

```
COMPUTE SW_S=MEAN(SW_S_1, SW_S_2, SW_S_3, SW_S_4, SW_S_5, SW_S_6,  
SW_S_7, SW_S_8).  
EXECUTE.
```

\*Reliabilität SW\_S\*

```
RELIABILITY  
/VARIABLES=SW_S_1 SW_S_2 SW_S_3 SW_S_4 SW_S_5 SW_S_6 SW_S_7 SW_S_8  
/SCALE('SW_S') ALL  
/MODEL=ALPHA  
/STATISTICS=DESCRIPTIVE SCALE  
/SUMMARY=TOTAL.
```

\*Skalenbildung SWSRL\*

```
COMPUTE SWSRL=MEAN(SWSRL_1, SWSRL_2, SWSRL_3, SWSRL_4, SWSRL_5,  
SWSRL_6, SWSRL_7, SWSRL_8, SWSRL_9, SWSRL_10, SWSRL_11).  
EXECUTE.
```

\*Reliabilität SWSRL\*

RELIABILITY

```
/VARIABLES=SWSRL_1 SWSRL_2 SWSRL_3 SWSRL_4 SWSRL_5 SWSRL_6  
SWSRL_7 SWSRL_8 SWSRL_9 SWSRL_10 SWSRL_11  
/SCALE('SWSRL') ALL  
/MODEL=ALPHA  
/STATISTICS=DESCRIPTIVE SCALE  
/SUMMARY=TOTAL.
```

### **SPSS-Syntax for T-Test comparing PhD Students to Regular Students**

```
T-TEST GROUPS=Studienform1(1 2)  
/MISSING=ANALYSIS  
/VARIABLES=sex Alter SWSRS_22 SWSRS_PRÄ_22 SWSRS_AKT_22  
SWSRS_POST_22 ASW SW_S REG SWSRL  
/CRITERIA=CI(.95).
```

### **SPSS-Syntax for Examining the Correlations between Correlations Among Measures of Self-Efficacy for Self-Regulation of Academic Writing (SSAW), General Self-Efficacy, General Self-Regulation, Academic Self-Efficacy, and Self-Efficacy for Self-Regulated Learning**

```
CORRELATIONS  
/VARIABLES=SWSRS_22 SWSRS_PRÄ_22 SWSRS_AKT_22 SWSRS_POST_22 ASW  
SW_S REG SWSRL  
/PRINT=TWOTAIL NOSIG  
/MISSING=PAIRWISE.
```
