# Supplementary material for: Assessing Self-Efficacy for Self-Regulation of Academic Writing
Source: Atypon-hosted journal article supplement (doi:10.1027/1015-5759/a000452), 2018-03-29
Supplement: 1015-5759_a000452_esm5.pdf [file 1015-5759_a000452_esm5.pdf]

\*\*\*\*\*SWSRS\*\*\*\*\*

\*Skalenbildung SWSRS\*

```
COMPUTE SWSRS_22=MEAN(SWSRS_pra_aa1, SWSRS_pra_aa2, SWSRS_pra_sm1, SWSRS_pra_sm2,  
  SWSRS_pra_sm3, SWSRS_pra_sm4, SWSRS_akt_sk1, SWSRS_akt_sk2,  
  SWSRS_akt_sk3, SWSRS_akt_sk4, SWSRS_akt_sk5, SWSRS_akt_sb1, SWSRS_akt_sb2,  
  SWSRS_akt_sb3, SWSRS_akt_sb4, SWSRS_post_sb1, SWSRS_post_sb2,  
  SWSRS_post_sb3, SWSRS_post_sr1, SWSRS_post_sr2, SWSRS_post_sr3, SWSRS_post_sr4).  
EXECUTE.
```

\*Reliabilität SWSRS\*

```
RELIABILITY  
  /VARIABLES=SWSRS_pra_aa1, SWSRS_pra_aa2, SWSRS_pra_sm1, SWSRS_pra_sm2,  
  SWSRS_pra_sm3, SWSRS_pra_sm4, SWSRS_akt_sk1, SWSRS_akt_sk2,  
  SWSRS_akt_sk3, SWSRS_akt_sk4, SWSRS_akt_sk5, SWSRS_akt_sb1, SWSRS_akt_sb2,  
  SWSRS_akt_sb3, SWSRS_akt_sb4, SWSRS_post_sb1, SWSRS_post_sb2,  
  SWSRS_post_sb3, SWSRS_post_sr1, SWSRS_post_sr2, SWSRS_post_sr3, SWSRS_post_sr4  
  /SCALE('SWSRS_22') ALL  
  /MODEL=ALPHA  
  /STATISTICS=DESCRIPTIVE SCALE  
  /SUMMARY=TOTAL.
```

## Reliabilität

### Skala: SWSRS\_22

#### Zusammenfassung der Fallverarbeitung

|                             | N   | %     |
|-----------------------------|-----|-------|
| Fälle Gültig                | 188 | 100,0 |
| Ausgeschlossen <sup>a</sup> | 0   | ,0    |
| Gesamt                      | 188 | 100,0 |

a. Listenweise Löschung auf der Grundlage aller Variablen in der Prozedur.

#### Reliabilitätsstatistiken

| Cronbachs Alpha | Anzahl der Items |
|-----------------|------------------|
| ,940            | 22               |

Itemstatistiken

|                                                                                                                                                                                    | Mittelwert | Standardabweichung | N   |
|------------------------------------------------------------------------------------------------------------------------------------------------------------------------------------|------------|--------------------|-----|
| [ Ich kann mir konkrete Schreibziele setzen. ] Um Ihnen die Beantwortung zu erleichtern, können Sie die Antwort in Prozent geben                                                   | 7,93       | 2,534              | 188 |
| [ Ich kann meine Ideen auch bei einem komplexen Thema gut organisieren. ] Um Ihnen die Beantwortung zu erleichtern, können Sie die Antwort in Prozent geben                        | 7,93       | 2,257              | 188 |
| [ Ich kann mich dazu motivieren mit dem Schreiben anzufangen. ] Um Ihnen die Beantwortung zu erleichtern, können Sie die Antwort in Prozent geben                                  | 7,01       | 2,591              | 188 |
| [ Ich kann Probleme, die beim Schreiben auftauchen, überwinden. ] Um Ihnen die Beantwortung zu erleichtern, können Sie die Antwort in Prozent geben                                | 8,66       | 1,879              | 188 |
| [ Ich kann Interesse für das Schreiben entwickeln. ] Um Ihnen die Beantwortung zu erleichtern, können Sie die Antwort in Prozent geben                                             | 8,45       | 2,478              | 188 |
| [ Ich kann leicht Wege finden mein Interesse am Schreiben zu steigern. ] Um Ihnen die Beantwortung zu erleichtern, können Sie die Antwort in Prozent geben                         | 6,58       | 2,569              | 188 |
| [ Ich kann mein Vorgehen beim Schreiben überwachen. ] Um Ihnen die Beantwortung zu erleichtern, können Sie die Antwort in Prozent geben                                            | 7,54       | 2,311              | 188 |
| [ Ich kann mich auf das Schreiben konzentrieren. ] Um Ihnen die Beantwortung zu erleichtern, können Sie die Antwort in Prozent geben                                               | 8,09       | 2,269              | 188 |
| [ Ich kann meine Schreibzeit effektiv nutzen. ] Um Ihnen die Beantwortung zu erleichtern, können Sie die Antwort in Prozent geben                                                  | 6,93       | 2,523              | 188 |
| [ Ich kann mir meine Zeit so einteilen, dass ich konzentriert an meinem Text arbeite. ] Um Ihnen die Beantwortung zu erleichtern, können Sie die Antwort in Prozent geben          | 7,39       | 2,538              | 188 |
| [ Ich kann mir meinen Schreibplatz so gestalten, dass ich ungestört schreiben kann. ] Um Ihnen die Beantwortung zu erleichtern, können Sie die Antwort in Prozent geben            | 8,66       | 2,324              | 188 |
| [ Ich kann mein Vorgehen beim Schreiben ändern, wenn ich merke, dass es nicht erfolgreich ist. ] Um Ihnen die Beantwortung zu erleichtern, können Sie die Antwort in Prozent geben | 7,77       | 2,246              | 188 |
| [ Ich kann mein Vorankommen beim Schreiben nachvollziehen. ] Um Ihnen die Beantwortung zu erleichtern, können Sie die Antwort in Prozent geben                                     | 8,56       | 2,063              | 188 |

Itemstatistiken

|                                                                                                                                                                                | Mittelwert | Standardabweichung | N   |
|--------------------------------------------------------------------------------------------------------------------------------------------------------------------------------|------------|--------------------|-----|
| [ Ich kann ausdauernd an meinem Text arbeiten. ] Um Ihnen die Beantwortung zu erleichtern, können Sie die Antwort in Prozent geben                                             | 7,86       | 2,485              | 188 |
| [ Ich kann eine Schreibblockade lösen und danach weiterschreiben. ] Um Ihnen die Beantwortung zu erleichtern, können Sie die Antwort in Prozent geben                          | 7,68       | 2,375              | 188 |
| [ Ich kann die Qualität meines Textes realistisch einschätzen. ] Um Ihnen die Beantwortung zu erleichtern, können Sie die Antwort in Prozent geben                             | 8,03       | 2,084              | 188 |
| [ Ich kann die von mir selbst gesetzten Kriterien für die Qualität meiner Texte erreichen. ] Um Ihnen die Beantwortung zu erleichtern, können Sie die Antwort in Prozent geben | 8,37       | 2,008              | 188 |
| [ Ich kann die von mir selbst gesetzten Teilziele beim Schreiben erreichen. ] Um Ihnen die Beantwortung zu erleichtern, können Sie die Antwort in Prozent geben                | 7,90       | 2,281              | 188 |
| [ Ich kann ein gutes Gefühl für das Vorankommen beim Schreiben entwickeln. ] Um Ihnen die Beantwortung zu erleichtern, können Sie die Antwort in Prozent geben                 | 8,24       | 2,066              | 188 |
| [ Ich kann vermeiden, dass ich einen Fehler beim nächsten Mal wieder mache. ] Um Ihnen die Beantwortung zu erleichtern, können Sie die Antwort in Prozent geben                | 7,84       | 2,189              | 188 |
| [ Ich kann mein Vorgehen bei Schreibprojekten durch Erfahrung verbessern. ] Um Ihnen die Beantwortung zu erleichtern, können Sie die Antwort in Prozent geben                  | 8,86       | 1,958              | 188 |
| [ Ich kann einschätzen, was ich beim nächsten Mal anders machen muss. ] Um Ihnen die Beantwortung zu erleichtern, können Sie die Antwort in Prozent geben                      | 8,12       | 2,065              | 188 |

Item-Skala-Statistiken

|                                                                                                                                                                                    | Skalenmittelwert, wenn Item weggelassen | Skalenvarianz, wenn Item weggelassen | Korrigierte Item-Skala-Korrelation | Cronbachs Alpha, wenn Item weggelassen |
|------------------------------------------------------------------------------------------------------------------------------------------------------------------------------------|-----------------------------------------|--------------------------------------|------------------------------------|----------------------------------------|
| [ Ich kann mir konkrete Schreibziele setzen. ] Um Ihnen die Beantwortung zu erleichtern, können Sie die Antwort in Prozent geben                                                   | 166,45                                  | 1027,019                             | ,507                               | ,939                                   |
| [ Ich kann meine Ideen auch bei einem komplexen Thema gut organisieren. ] Um Ihnen die Beantwortung zu erleichtern, können Sie die Antwort in Prozent geben                        | 166,45                                  | 1025,019                             | ,593                               | ,937                                   |
| [ Ich kann mich dazu motivieren mit dem Schreiben anzufangen. ] Um Ihnen die Beantwortung zu erleichtern, können Sie die Antwort in Prozent geben                                  | 167,37                                  | 1007,903                             | ,615                               | ,937                                   |
| [ Ich kann Probleme, die beim Schreiben auftauchen, überwinden. ] Um Ihnen die Beantwortung zu erleichtern, können Sie die Antwort in Prozent geben                                | 165,72                                  | 1038,375                             | ,610                               | ,937                                   |
| [ Ich kann Interesse für das Schreiben entwickeln. ] Um Ihnen die Beantwortung zu erleichtern, können Sie die Antwort in Prozent geben                                             | 165,93                                  | 1016,283                             | ,591                               | ,937                                   |
| [ Ich kann leicht Wege finden mein Interesse am Schreiben zu steigern. ] Um Ihnen die Beantwortung zu erleichtern, können Sie die Antwort in Prozent geben                         | 167,80                                  | 1015,798                             | ,571                               | ,938                                   |
| [ Ich kann mein Vorgehen beim Schreiben überwachen. ] Um Ihnen die Beantwortung zu erleichtern, können Sie die Antwort in Prozent geben                                            | 166,84                                  | 1011,557                             | ,673                               | ,936                                   |
| [ Ich kann mich auf das Schreiben konzentrieren. ] Um Ihnen die Beantwortung zu erleichtern, können Sie die Antwort in Prozent geben                                               | 166,29                                  | 1008,176                             | ,711                               | ,936                                   |
| [ Ich kann meine Schreibzeit effektiv nutzen. ] Um Ihnen die Beantwortung zu erleichtern, können Sie die Antwort in Prozent geben                                                  | 167,45                                  | 993,628                              | ,728                               | ,935                                   |
| [ Ich kann mir meine Zeit so einteilen, dass ich konzentriert an meinem Text arbeite. ] Um Ihnen die Beantwortung zu erleichtern, können Sie die Antwort in Prozent geben          | 166,98                                  | 1009,395                             | ,620                               | ,937                                   |
| [ Ich kann mir meinen Schreibplatz so gestalten, dass ich ungestört schreiben kann. ] Um Ihnen die Beantwortung zu erleichtern, können Sie die Antwort in Prozent geben            | 165,71                                  | 1044,698                             | ,438                               | ,940                                   |
| [ Ich kann mein Vorgehen beim Schreiben ändern, wenn ich merke, dass es nicht erfolgreich ist. ] Um Ihnen die Beantwortung zu erleichtern, können Sie die Antwort in Prozent geben | 166,61                                  | 1013,716                             | ,679                               | ,936                                   |
| [ Ich kann mein Vorankommen beim Schreiben nachvollziehen. ] Um Ihnen die Beantwortung zu erleichtern, können Sie die Antwort in Prozent geben                                     | 165,81                                  | 1020,516                             | ,691                               | ,936                                   |

**Item-Skala-Statistiken**

|                                                                                                                                                                                | Skalenmittelwert, wenn Item weggelassen | Skalenvarianz, wenn Item weggelassen | Korrigierte Item-Skala-Korrelation | Cronbachs Alpha, wenn Item weggelassen |
|--------------------------------------------------------------------------------------------------------------------------------------------------------------------------------|-----------------------------------------|--------------------------------------|------------------------------------|----------------------------------------|
| [ Ich kann ausdauernd an meinem Text arbeiten. ] Um Ihnen die Beantwortung zu erleichtern, können Sie die Antwort in Prozent geben                                             | 166,52                                  | 1006,893                             | ,651                               | ,936                                   |
| [ Ich kann eine Schreibblockade lösen und danach weiterschreiben. ] Um Ihnen die Beantwortung zu erleichtern, können Sie die Antwort in Prozent geben                          | 166,70                                  | 1009,718                             | ,666                               | ,936                                   |
| [ Ich kann die Qualität meines Textes realistisch einschätzen. ] Um Ihnen die Beantwortung zu erleichtern, können Sie die Antwort in Prozent geben                             | 166,35                                  | 1040,088                             | ,531                               | ,938                                   |
| [ Ich kann die von mir selbst gesetzten Kriterien für die Qualität meiner Texte erreichen. ] Um Ihnen die Beantwortung zu erleichtern, können Sie die Antwort in Prozent geben | 166,01                                  | 1027,075                             | ,658                               | ,937                                   |
| [ Ich kann die von mir selbst gesetzten Teilziele beim Schreiben erreichen. ] Um Ihnen die Beantwortung zu erleichtern, können Sie die Antwort in Prozent geben                | 166,48                                  | 1010,882                             | ,688                               | ,936                                   |
| [ Ich kann ein gutes Gefühl für das Vorankommen beim Schreiben entwickeln. ] Um Ihnen die Beantwortung zu erleichtern, können Sie die Antwort in Prozent geben                 | 166,14                                  | 1011,938                             | ,758                               | ,935                                   |
| [ Ich kann vermeiden, dass ich einen Fehler beim nächsten Mal wieder mache. ] Um Ihnen die Beantwortung zu erleichtern, können Sie die Antwort in Prozent geben                | 166,54                                  | 1028,977                             | ,584                               | ,937                                   |
| [ Ich kann mein Vorgehen bei Schreibprojekten durch Erfahrung verbessern. ] Um Ihnen die Beantwortung zu erleichtern, können Sie die Antwort in Prozent geben                  | 165,52                                  | 1037,181                             | ,593                               | ,937                                   |
| [ Ich kann einschätzen, was ich beim nächsten Mal anders machen muss. ] Um Ihnen die Beantwortung zu erleichtern, können Sie die Antwort in Prozent geben                      | 166,26                                  | 1026,814                             | ,640                               | ,937                                   |

**Skala-Statistiken**

| Mittelwert | Varianz  | Standardabweichung | Anzahl der Items |
|------------|----------|--------------------|------------------|
| 174,38     | 1115,830 | 33,404             | 22               |

\*\*\*\*\*SWSRS\_PRÄ\*\*\*\*\*

\*Skalenbildung SWSRS\_PRÄ\*

```
COMPUTE SWSRS_PRÄ_22=MEAN(SWSRS_prä_aa_1, SWSRS_prä_aa_2, SWSRS_prä_sm_1, SWSRS_prä_sm_2,
    SWSRS_prä_sm_3, SWSRS_prä_sm_4).
EXECUTE.
```

\*Reliabilität SWSRS\_PRÄ\*

```
RELIABILITY
/VARIABLES=SWSRS_prä_aa_1, SWSRS_prä_aa_2, SWSRS_prä_sm_1, SWSRS_prä_sm_2,
    SWSRS_prä_sm_3, SWSRS_prä_sm_4
/SCALE('SWSRS_PRÄ_22') ALL
/MODEL=ALPHA
```

/STATISTICS=DESCRIPTIVE SCALE  
 /SUMMARY=TOTAL.

## Reliabilität

### Skala: SWSRS\_PRÄ\_22

#### Zusammenfassung der Fallverarbeitung

|       |                             | N   | %     |
|-------|-----------------------------|-----|-------|
| Fälle | Gültig                      | 188 | 100,0 |
|       | Ausgeschlossen <sup>a</sup> | 0   | ,0    |
|       | Gesamt                      | 188 | 100,0 |

a. Listenweise Löschung auf der Grundlage aller Variablen in der Prozedur.

#### Reliabilitätsstatistiken

| Cronbachs Alpha | Anzahl der Items |
|-----------------|------------------|
| ,790            | 6                |

#### Itemstatistiken

|                                                                                                                                                             | Mittelwert | Standardabweichung | N   |
|-------------------------------------------------------------------------------------------------------------------------------------------------------------|------------|--------------------|-----|
| [ Ich kann mir konkrete Schreibziele setzen. ] Um Ihnen die Beantwortung zu erleichtern, können Sie die Antwort in Prozent geben                            | 7,93       | 2,534              | 188 |
| [ Ich kann meine Ideen auch bei einem komplexen Thema gut organisieren. ] Um Ihnen die Beantwortung zu erleichtern, können Sie die Antwort in Prozent geben | 7,93       | 2,257              | 188 |
| [ Ich kann mich dazu motivieren mit dem Schreiben anzufangen. ] Um Ihnen die Beantwortung zu erleichtern, können Sie die Antwort in Prozent geben           | 7,01       | 2,591              | 188 |
| [ Ich kann Probleme, die beim Schreiben auftauchen, überwinden. ] Um Ihnen die Beantwortung zu erleichtern, können Sie die Antwort in Prozent geben         | 8,66       | 1,879              | 188 |
| [ Ich kann Interesse für das Schreiben entwickeln. ] Um Ihnen die Beantwortung zu erleichtern, können Sie die Antwort in Prozent geben                      | 8,45       | 2,478              | 188 |
| [ Ich kann leicht Wege finden mein Interesse am Schreiben zu steigern. ] Um Ihnen die Beantwortung zu erleichtern, können Sie die Antwort in Prozent geben  | 6,58       | 2,569              | 188 |

**Item-Skala-Statistiken**

|                                                                                                                                                             | Skalenmittelwert, wenn Item weggelassen | Skalenvarianz, wenn Item weggelassen | Korrigierte Item-Skala-Korrelation | Cronbachs Alpha, wenn Item weggelassen |
|-------------------------------------------------------------------------------------------------------------------------------------------------------------|-----------------------------------------|--------------------------------------|------------------------------------|----------------------------------------|
| [ Ich kann mir konkrete Schreibziele setzen. ] Um Ihnen die Beantwortung zu erleichtern, können Sie die Antwort in Prozent geben                            | 38,62                                   | 75,188                               | ,443                               | ,783                                   |
| [ Ich kann meine Ideen auch bei einem komplexen Thema gut organisieren. ] Um Ihnen die Beantwortung zu erleichtern, können Sie die Antwort in Prozent geben | 38,62                                   | 75,787                               | ,514                               | ,765                                   |
| [ Ich kann mich dazu motivieren mit dem Schreiben anzufangen. ] Um Ihnen die Beantwortung zu erleichtern, können Sie die Antwort in Prozent geben           | 39,54                                   | 69,426                               | ,578                               | ,750                                   |
| [ Ich kann Probleme, die beim Schreiben auftauchen, überwinden. ] Um Ihnen die Beantwortung zu erleichtern, können Sie die Antwort in Prozent geben         | 37,89                                   | 80,314                               | ,512                               | ,768                                   |
| [ Ich kann Interesse für das Schreiben entwickeln. ] Um Ihnen die Beantwortung zu erleichtern, können Sie die Antwort in Prozent geben                      | 38,10                                   | 68,964                               | ,631                               | ,736                                   |
| [ Ich kann leicht Wege finden mein Interesse am Schreiben zu steigern. ] Um Ihnen die Beantwortung zu erleichtern, können Sie die Antwort in Prozent geben  | 39,97                                   | 69,197                               | ,592                               | ,746                                   |

**Skala-Statistiken**

| Mittelwert | Varianz | Standardabweichung | Anzahl der Items |
|------------|---------|--------------------|------------------|
| 46,55      | 101,094 | 10,055             | 6                |

\*\*\*\*\*SWSRS\_AKT\*\*\*\*\*

\*Skalenbildung SWSRS\_AKT\*

```
COMPUTE SWSRS_AKT_22=MEAN(SWSRS_akt_sk_1, SWSRS_akt_sk_2,
    SWSRS_akt_sk_3, SWSRS_akt_sk_4, SWSRS_akt_sk_5, SWSRS_akt_sb_1, SWSRS_akt_sb_2,
    SWSRS_akt_sb_3, SWSRS_akt_sb_4).
EXECUTE.
```

\*Reliabilität SWSRS\_AKT\*

RELIABILITY

```
/VARIABLES=SWSRS_akt_sk_1, SWSRS_akt_sk_2,
    SWSRS_akt_sk_3, SWSRS_akt_sk_4, SWSRS_akt_sk_5, SWSRS_akt_sb_1, SWSRS_akt_sb_2,
    SWSRS_akt_sb_3, SWSRS_akt_sb_4
/SCALE('SWSRS_AKT_22') ALL
/MODEL=ALPHA
/STATISTICS=DESCRIPTIVE SCALE
/SUMMARY=TOTAL.
```

**Reliabilität**

**Skala: SWSRS\_AKT\_22**

### Zusammenfassung der Fallverarbeitung

|       |                             | N   | %     |
|-------|-----------------------------|-----|-------|
| Fälle | Gültig                      | 188 | 100,0 |
|       | Ausgeschlossen <sup>a</sup> | 0   | ,0    |
|       | Gesamt                      | 188 | 100,0 |

a. Listenweise Löschung auf der Grundlage aller Variablen in der Prozedur.

### Reliabilitätsstatistiken

| Cronbachs Alpha | Anzahl der Items |
|-----------------|------------------|
| ,885            | 9                |

### Itemstatistiken

|                                                                                                                                                                                    | Mittelwert | Standardabweichung | N   |
|------------------------------------------------------------------------------------------------------------------------------------------------------------------------------------|------------|--------------------|-----|
| [ Ich kann mein Vorgehen beim Schreiben überwachen. ] Um Ihnen die Beantwortung zu erleichtern, können Sie die Antwort in Prozent geben                                            | 7,54       | 2,311              | 188 |
| [ Ich kann mich auf das Schreiben konzentrieren. ] Um Ihnen die Beantwortung zu erleichtern, können Sie die Antwort in Prozent geben                                               | 8,09       | 2,269              | 188 |
| [ Ich kann meine Schreibzeit effektiv nutzen. ] Um Ihnen die Beantwortung zu erleichtern, können Sie die Antwort in Prozent geben                                                  | 6,93       | 2,523              | 188 |
| [ Ich kann mir meine Zeit so einteilen, dass ich konzentriert an meinem Text arbeite. ] Um Ihnen die Beantwortung zu erleichtern, können Sie die Antwort in Prozent geben          | 7,39       | 2,538              | 188 |
| [ Ich kann mir meinen Schreibplatz so gestalten, dass ich ungestört schreiben kann. ] Um Ihnen die Beantwortung zu erleichtern, können Sie die Antwort in Prozent geben            | 8,66       | 2,324              | 188 |
| [ Ich kann mein Vorgehen beim Schreiben ändern, wenn ich merke, dass es nicht erfolgreich ist. ] Um Ihnen die Beantwortung zu erleichtern, können Sie die Antwort in Prozent geben | 7,77       | 2,246              | 188 |
| [ Ich kann mein Vorankommen beim Schreiben nachvollziehen. ] Um Ihnen die Beantwortung zu erleichtern, können Sie die Antwort in Prozent geben                                     | 8,56       | 2,063              | 188 |
| [ Ich kann ausdauernd an meinem Text arbeiten. ] Um Ihnen die Beantwortung zu erleichtern, können Sie die Antwort in Prozent geben                                                 | 7,86       | 2,485              | 188 |
| [ Ich kann eine Schreibblockade lösen und danach weiterschreiben. ] Um Ihnen die Beantwortung zu erleichtern, können Sie die Antwort in Prozent geben                              | 7,68       | 2,375              | 188 |



**Item-Skala-Statistiken**

|                                                                                                                                                                                    | Skalenmittelwert, wenn Item weggelassen | Skalenvarianz, wenn Item weggelassen | Korrigierte Item-Skala-Korrelation | Cronbachs Alpha, wenn Item weggelassen |
|------------------------------------------------------------------------------------------------------------------------------------------------------------------------------------|-----------------------------------------|--------------------------------------|------------------------------------|----------------------------------------|
| [ Ich kann mein Vorgehen beim Schreiben überwachen. ] Um Ihnen die Beantwortung zu erleichtern, können Sie die Antwort in Prozent geben                                            | 62,94                                   | 189,382                              | ,615                               | ,874                                   |
| [ Ich kann mich auf das Schreiben konzentrieren. ] Um Ihnen die Beantwortung zu erleichtern, können Sie die Antwort in Prozent geben                                               | 62,39                                   | 184,475                              | ,717                               | ,866                                   |
| [ Ich kann meine Schreibzeit effektiv nutzen. ] Um Ihnen die Beantwortung zu erleichtern, können Sie die Antwort in Prozent geben                                                  | 63,55                                   | 178,431                              | ,728                               | ,865                                   |
| [ Ich kann mir meine Zeit so einteilen, dass ich konzentriert an meinem Text arbeite. ] Um Ihnen die Beantwortung zu erleichtern, können Sie die Antwort in Prozent geben          | 63,09                                   | 183,009                              | ,646                               | ,872                                   |
| [ Ich kann mir meinen Schreibplatz so gestalten, dass ich ungestört schreiben kann. ] Um Ihnen die Beantwortung zu erleichtern, können Sie die Antwort in Prozent geben            | 61,81                                   | 197,660                              | ,471                               | ,886                                   |
| [ Ich kann mein Vorgehen beim Schreiben ändern, wenn ich merke, dass es nicht erfolgreich ist. ] Um Ihnen die Beantwortung zu erleichtern, können Sie die Antwort in Prozent geben | 62,71                                   | 190,187                              | ,623                               | ,874                                   |
| [ Ich kann mein Vorankommen beim Schreiben nachvollziehen. ] Um Ihnen die Beantwortung zu erleichtern, können Sie die Antwort in Prozent geben                                     | 61,91                                   | 191,650                              | ,664                               | ,871                                   |
| [ Ich kann ausdauernd an meinem Text arbeiten. ] Um Ihnen die Beantwortung zu erleichtern, können Sie die Antwort in Prozent geben                                                 | 62,62                                   | 183,787                              | ,651                               | ,871                                   |
| [ Ich kann eine Schreibblockade lösen und danach weiterschreiben. ] Um Ihnen die Beantwortung zu erleichtern, können Sie die Antwort in Prozent geben                              | 62,80                                   | 188,073                              | ,616                               | ,874                                   |

**Skala-Statistiken**

| Mittelwert | Varianz | Standardabweichung | Anzahl der Items |
|------------|---------|--------------------|------------------|
| 70,48      | 233,834 | 15,292             | 9                |

\*\*\*\*\*SWSRS\_POST\*\*\*\*\*

\*Skalenbildung SWSRS\_POST\*

```
COMPUTE SWSRS_POST_22=MEAN(SWSRS_post_sb_1, SWSRS_post_sb_2,
    SWSRS_post_sb_3, SWSRS_post_sr_1, SWSRS_post_sr_2, SWSRS_post_sr_3, SWSRS_post_sr_4).
EXECUTE.
```

\*Reliabilität SWSRS\_POST\*

RELIABILITY

```
/VARIABLES=SWSRS_post_sb_1, SWSRS_post_sb_2,
    SWSRS_post_sb_3, SWSRS_post_sr_1, SWSRS_post_sr_2, SWSRS_post_sr_3, SWSRS_post_sr_4
/SCALE('SWSRS_POST_22') ALL
/MODEL=ALPHA
/STATISTICS=DESCRIPTIVE SCALE
/SUMMARY=TOTAL.
```

## Reliabilität

### Skala: SWSRS\_POST\_22

#### Zusammenfassung der Fallverarbeitung

|                             | N   | %     |
|-----------------------------|-----|-------|
| Fälle Gültig                | 188 | 100,0 |
| Ausgeschlossen <sup>a</sup> | 0   | ,0    |
| Gesamt                      | 188 | 100,0 |

a. Listenweise Löschung auf der Grundlage aller Variablen in der Prozedur.

#### Reliabilitätsstatistiken

| Cronbachs Alpha | Anzahl der Items |
|-----------------|------------------|
| ,869            | 7                |

#### Itemstatistiken

|                                                                                                                                                                                | Mittelwert | Standardabweichung | N   |
|--------------------------------------------------------------------------------------------------------------------------------------------------------------------------------|------------|--------------------|-----|
| [ Ich kann die Qualität meines Textes realistisch einschätzen. ] Um Ihnen die Beantwortung zu erleichtern, können Sie die Antwort in Prozent geben                             | 8,03       | 2,084              | 188 |
| [ Ich kann die von mir selbst gesetzten Kriterien für die Qualität meiner Texte erreichen. ] Um Ihnen die Beantwortung zu erleichtern, können Sie die Antwort in Prozent geben | 8,37       | 2,008              | 188 |
| [ Ich kann die von mir selbst gesetzten Teilziele beim Schreiben erreichen. ] Um Ihnen die Beantwortung zu erleichtern, können Sie die Antwort in Prozent geben                | 7,90       | 2,281              | 188 |
| [ Ich kann ein gutes Gefühl für das Vorankommen beim Schreiben entwickeln. ] Um Ihnen die Beantwortung zu erleichtern, können Sie die Antwort in Prozent geben                 | 8,24       | 2,066              | 188 |
| [ Ich kann vermeiden, dass ich einen Fehler beim nächsten Mal wieder mache. ] Um Ihnen die Beantwortung zu erleichtern, können Sie die Antwort in Prozent geben                | 7,84       | 2,189              | 188 |
| [ Ich kann mein Vorgehen bei Schreiprojekten durch Erfahrung verbessern. ] Um Ihnen die Beantwortung zu erleichtern, können Sie die Antwort in Prozent geben                   | 8,86       | 1,958              | 188 |
| [ Ich kann einschätzen, was ich beim nächsten Mal anders machen muss. ] Um Ihnen die Beantwortung zu erleichtern, können Sie die Antwort in Prozent geben                      | 8,12       | 2,065              | 188 |

**Item-Skala-Statistiken**

|                                                                                                                                                                                | Skalenmittelwert, wenn Item weggelassen | Skalenvarianz, wenn Item weggelassen | Korrigierte Item-Skala-Korrelation | Cronbachs Alpha, wenn Item weggelassen |
|--------------------------------------------------------------------------------------------------------------------------------------------------------------------------------|-----------------------------------------|--------------------------------------|------------------------------------|----------------------------------------|
| [ Ich kann die Qualität meines Textes realistisch einschätzen. ] Um Ihnen die Beantwortung zu erleichtern, können Sie die Antwort in Prozent geben                             | 49,32                                   | 94,390                               | ,536                               | ,864                                   |
| [ Ich kann die von mir selbst gesetzten Kriterien für die Qualität meiner Texte erreichen. ] Um Ihnen die Beantwortung zu erleichtern, können Sie die Antwort in Prozent geben | 48,98                                   | 90,470                               | ,679                               | ,846                                   |
| [ Ich kann die von mir selbst gesetzten Teilziele beim Schreiben erreichen. ] Um Ihnen die Beantwortung zu erleichtern, können Sie die Antwort in Prozent geben                | 49,45                                   | 88,762                               | ,616                               | ,855                                   |
| [ Ich kann ein gutes Gefühl für das Vorankommen beim Schreiben entwickeln. ] Um Ihnen die Beantwortung zu erleichtern, können Sie die Antwort in Prozent geben                 | 49,11                                   | 89,469                               | ,683                               | ,845                                   |
| [ Ich kann vermeiden, dass ich einen Fehler beim nächsten Mal wieder mache. ] Um Ihnen die Beantwortung zu erleichtern, können Sie die Antwort in Prozent geben                | 49,52                                   | 88,187                               | ,668                               | ,847                                   |
| [ Ich kann mein Vorgehen bei Schreiprojekten durch Erfahrung verbessern. ] Um Ihnen die Beantwortung zu erleichtern, können Sie die Antwort in Prozent geben                   | 48,49                                   | 93,396                               | ,613                               | ,854                                   |
| [ Ich kann einschätzen, was ich beim nächsten Mal anders machen muss. ] Um Ihnen die Beantwortung zu erleichtern, können Sie die Antwort in Prozent geben                      | 49,23                                   | 88,223                               | ,720                               | ,840                                   |

**Skala-Statistiken**

| Mittelwert | Varianz | Standardabweichung | Anzahl der Items |
|------------|---------|--------------------|------------------|
| 57,35      | 120,432 | 10,974             | 7                |

\*\*\*\*\*ASW\*\*\*\*\*

\*Skalenbildung ASW\*

```
COMPUTE ASW=MEAN(ASW_1, ASW_2, ASW_3, ASW_4, ASW_5, ASW_6, ASW_7, ASW_8, ASW_9, ASW_10).
EXECUTE.
```

\*Reliabilität ASW\*

RELIABILITY

```
/VARIABLES=ASW_1 ASW_2 ASW_3 ASW_4 ASW_5 ASW_6 ASW_7 ASW_8 ASW_9 ASW_10
/SCALE('ASW') ALL
/MODEL=ALPHA
/STATISTICS=DESCRIPTIVE SCALE
/SUMMARY=TOTAL.
```

**Reliabilität**

**Skala: ASW**

### Zusammenfassung der Fallverarbeitung

|       |                             | N   | %     |
|-------|-----------------------------|-----|-------|
| Fälle | Gültig                      | 175 | 93,1  |
|       | Ausgeschlossen <sup>a</sup> | 13  | 6,9   |
|       | Gesamt                      | 188 | 100,0 |

a. Listenweise Löschung auf der Grundlage aller Variablen in der Prozedur.

### Reliabilitätsstatistiken

| Cronbachs Alpha | Anzahl der Items |
|-----------------|------------------|
| ,845            | 10               |

### Itemstatistiken

|                                                                                                  | Mittelwert | Standardabweichung | N   |
|--------------------------------------------------------------------------------------------------|------------|--------------------|-----|
| [ Wenn sich Widerstände auftun, finde ich Mittel und Wege, mich durchzusetzen.]                  | 2,96       | ,628               | 175 |
| [ Die Lösung schwieriger Probleme gelingt mir immer, wenn ich mich darum bemühe.]                | 3,23       | ,541               | 175 |
| [ Es bereitet mir keine Schwierigkeiten, meine Absichten und Ziele zu verwirklichen.]            | 2,90       | ,631               | 175 |
| [ In unerwarteten Situationen weiß ich immer, wie ich mich verhalten soll.]                      | 2,63       | ,570               | 175 |
| [ Auch bei überraschenden Ereignissen glaube ich, dass ich gut mit ihnen zurechtkommen kann.]    | 3,01       | ,657               | 175 |
| [ Schwierigkeiten sehe ich gelassen entgegen, weil ich meinen Fähigkeiten immer vertrauen kann.] | 2,94       | ,748               | 175 |
| [ Was auch immer passiert, ich werde schon klarkommen.]                                          | 3,33       | ,752               | 175 |
| [ Für jedes Problem kann ich eine Lösung finden.]                                                | 3,00       | ,686               | 175 |
| [ Wenn eine neue Sache auf mich zukommt, weiß ich, wie ich damit umgehen kann.]                  | 2,90       | ,558               | 175 |
| [ Wenn ein Problem auftaucht, kann ich es aus eigener Kraft meistern.]                           | 3,14       | ,488               | 175 |

**Item-Skala-Statistiken**

|                                                                                                  | Skalenmittelwert, wenn Item weggelassen | Skalenvarianz, wenn Item weggelassen | Korrigierte Item-Skala-Korrelation | Cronbachs Alpha, wenn Item weggelassen |
|--------------------------------------------------------------------------------------------------|-----------------------------------------|--------------------------------------|------------------------------------|----------------------------------------|
| [ Wenn sich Widerstände auftun, finde ich Mittel und Wege, mich durchzusetzen.]                  | 27,08                                   | 13,787                               | ,531                               | ,832                                   |
| [ Die Lösung schwieriger Probleme gelingt mir immer, wenn ich mich darum bemühe.]                | 26,81                                   | 14,326                               | ,499                               | ,835                                   |
| [ Es bereitet mir keine Schwierigkeiten, meine Absichten und Ziele zu verwirklichen.]            | 27,14                                   | 14,004                               | ,478                               | ,837                                   |
| [ In unerwarteten Situationen weiß ich immer, wie ich mich verhalten soll.]                      | 27,41                                   | 14,541                               | ,412                               | ,842                                   |
| [ Auch bei überraschenden Ereignissen glaube ich, dass ich gut mit ihnen zurecht kommen kann.]   | 27,03                                   | 13,298                               | ,612                               | ,824                                   |
| [ Schwierigkeiten sehe ich gelassen entgegen, weil ich meinen Fähigkeiten immer vertrauen kann.] | 27,10                                   | 12,536                               | ,672                               | ,817                                   |
| [ Was auch immer passiert, ich werde schon klarkommen.]                                          | 26,71                                   | 12,791                               | ,614                               | ,824                                   |
| [ Für jedes Problem kann ich eine Lösung finden.]                                                | 27,04                                   | 13,935                               | ,440                               | ,841                                   |
| [ Wenn eine neue Sache auf mich zukommt, weiß ich, wie ich damit umgehen kann.]                  | 27,14                                   | 13,801                               | ,614                               | ,825                                   |
| [ Wenn ein Problem auftaucht, kann ich es aus eigener Kraft meistern.]                           | 26,90                                   | 14,242                               | ,592                               | ,829                                   |

**Skala-Statistiken**

| Mittelwert | Varianz | Standardabweichung | Anzahl der Items |
|------------|---------|--------------------|------------------|
| 30,04      | 16,659  | 4,082              | 10               |

\*\*\*\*\*REG\*\*\*\*\*

\*Skalenbildung REG\*

\*umkodierte Variablen\*

```
RECODE REG_5 (1=4) (2=3) (3=2) (4=1) INTO REG_5_i.
VARIABLE LABELS REG_5_i 'REG_5_i'.
EXECUTE.
```

```
RECODE REG_7 (1=4) (2=3) (3=2) (4=1) INTO REG_7_i.
VARIABLE LABELS REG_7_i 'REG_7_i'.
EXECUTE.
```

```
RECODE REG_9 (1=4) (2=3) (3=2) (4=1) INTO REG_9_i.
VARIABLE LABELS REG_9_i 'REG_9_i'.
EXECUTE.
```

```
COMPUTE REG=MEAN(REG_1, REG_2, REG_3, REG_4, REG_5_i, REG_6, REG_7_i, REG_8, REG_9_i, REG_10).
EXECUTE.
```

\*Reliabilität REG\*

RELIABILITY

```
/VARIABLES=REG_1 REG_2 REG_3 REG_4 REG_5_i REG_6 REG_7_i REG_8 REG_9_i REG_10
/SCALE('REG') ALL
/MODEL=ALPHA
/STATISTICS=DESCRIPTIVE SCALE
/SUMMARY=TOTAL.
```

**Reliabilität**

**Skala: REG**

### Zusammenfassung der Fallverarbeitung

|       |                             | N   | %     |
|-------|-----------------------------|-----|-------|
| Fälle | Gültig                      | 176 | 93,6  |
|       | Ausgeschlossen <sup>a</sup> | 12  | 6,4   |
|       | Gesamt                      | 188 | 100,0 |

a. Listenweise Löschung auf der Grundlage aller Variablen in der Prozedur.

### Reliabilitätsstatistiken

| Cronbachs Alpha | Anzahl der Items |
|-----------------|------------------|
| ,798            | 10               |

### Itemstatistiken

|                                                                                                                         | Mittelwert | Standardabweichung | N   |
|-------------------------------------------------------------------------------------------------------------------------|------------|--------------------|-----|
| [ Ich kann mich lange Zeit auf eine Sache konzentrieren, wenn es nötig ist.]                                            | 3,2045     | ,69544             | 176 |
| [ Wenn ich von einer Sache abgelenkt werde, komme ich schnell wieder zum Thema zurück.]                                 | 2,7443     | ,69896             | 176 |
| [ Wenn ich bei einer Tätigkeit zu aufgeregt werde, kann ich mich so beruhigen, dass ich bald wieder weitermachen kann.] | 2,8750     | ,67295             | 176 |
| [ Wenn bei einer Tätigkeit eine sachliche Haltung nötig ist, kann ich meine Gefühle unter Kontrolle bringen.]           | 3,1648     | ,68545             | 176 |
| REG_5_i                                                                                                                 | 2,4773     | ,77794             | 176 |
| [ Ich kann es verhindern, dass die Gedanken ständig von meiner Aufgabe abschweifen.]                                    | 2,7102     | ,66857             | 176 |
| REG_7_i                                                                                                                 | 2,2216     | ,80838             | 176 |
| [ Nach einer Unterbrechung finde ich problemlos zu einer konzentrierten Arbeitsweise zurück.]                           | 2,8068     | ,71487             | 176 |
| REG_9_i                                                                                                                 | 2,8409     | ,82651             | 176 |
| [ Ich behalte mein Ziel im Auge und lasse mich nicht vom Weg abbringen.]                                                | 3,0227     | ,71677             | 176 |

**Item-Skala-Statistiken**

|                                                                                                                         | Skalenmittelwert, wenn Item weggelassen | Skalenvarianz, wenn Item weggelassen | Korrigierte Item-Skala-Korrelation | Cronbachs Alpha, wenn Item weggelassen |
|-------------------------------------------------------------------------------------------------------------------------|-----------------------------------------|--------------------------------------|------------------------------------|----------------------------------------|
| [ Ich kann mich lange Zeit auf eine Sache konzentrieren, wenn es nötig ist.]                                            | 24,8636                                 | 15,307                               | ,556                               | ,770                                   |
| [ Wenn ich von einer Sache abgelenkt werde, komme ich schnell wieder zum Thema zurück.]                                 | 25,3239                                 | 15,717                               | ,471                               | ,780                                   |
| [ Wenn ich bei einer Tätigkeit zu aufgeregt werde, kann ich mich so beruhigen, dass ich bald wieder weitermachen kann.] | 25,1932                                 | 15,265                               | ,590                               | ,767                                   |
| [ Wenn bei einer Tätigkeit eine sachliche Haltung nötig ist, kann ich meine Gefühle unter Kontrolle bringen.]           | 24,9034                                 | 16,888                               | ,259                               | ,803                                   |
| REG_5_i                                                                                                                 | 25,5909                                 | 14,712                               | ,587                               | ,765                                   |
| [ Ich kann es verhindern, dass die Gedanken ständig von meiner Aufgabe abschweifen.]                                    | 25,3580                                 | 15,283                               | ,591                               | ,767                                   |
| REG_7_i                                                                                                                 | 25,8466                                 | 16,039                               | ,328                               | ,798                                   |
| [ Nach einer Unterbrechung finde ich problemlos zu einer konzentrierten Arbeitsweise zurück.]                           | 25,2614                                 | 15,211                               | ,555                               | ,770                                   |
| REG_9_i                                                                                                                 | 25,2273                                 | 15,045                               | ,482                               | ,779                                   |
| [ Ich behalte mein Ziel im Auge und lasse mich nicht vom Weg abbringen.]                                                | 25,0455                                 | 16,386                               | ,331                               | ,796                                   |

**Skala-Statistiken**

| Mittelwert | Varianz | Standardabweichung | Anzahl der Items |
|------------|---------|--------------------|------------------|
| 28,0682    | 18,818  | 4,33799            | 10               |

\*\*\*\*\*SW\_S\*\*\*\*\*

\*Skalenbildung SW\_S\*

```
COMPUTE SW_S=MEAN(SW_S_1, SW_S_2, SW_S_3, SW_S_4, SW_S_5, SW_S_6, SW_S_7, SW_S_8).
EXECUTE.
```

\*Reliabilität SW\_S\*

RELIABILITY

```
/VARIABLES=SW_S_1 SW_S_2 SW_S_3 SW_S_4 SW_S_5 SW_S_6 SW_S_7 SW_S_8
/SCALE('SW_S') ALL
/MODEL=ALPHA
/STATISTICS=DESCRIPTIVE SCALE
/SUMMARY=TOTAL.
```

**Reliabilität**

**Skala: SW\_S**

**Zusammenfassung der Fallverarbeitung**

|       |                             | N   | %     |
|-------|-----------------------------|-----|-------|
| Fälle | Gültig                      | 183 | 97,3  |
|       | Ausgeschlossen <sup>a</sup> | 5   | 2,7   |
|       | Gesamt                      | 188 | 100,0 |

a. Listenweise Löschung auf der Grundlage aller Variablen in der Prozedur.

**Reliabilitätsstatistiken**

| Cronbachs Alpha | Anzahl der Items |
|-----------------|------------------|
| ,830            | 8                |

**Itemstatistiken**

|                                                                                                                         | Mittelwert | Standardabweichung | N   |
|-------------------------------------------------------------------------------------------------------------------------|------------|--------------------|-----|
| [ Wenn im Studium unerwartete Situationen auftauchen, weiß ich immer, wie ich mich verhalten soll. ]                    | 2,72       | ,632               | 183 |
| [ Für jedes Problem im Studium habe ich eine Lösung. ]                                                                  | 2,94       | ,656               | 183 |
| [ Schwierigkeiten im Studium sehe ich gelassen entgegen, weil ich mich immer auf meine Fähigkeiten verlassen kann. ]    | 3,03       | ,733               | 183 |
| [ Wenn ich im Studium mit einem Problem konfrontiert werde, habe ich meist mehrere Ideen, wie ich damit fertig werde. ] | 3,04       | ,632               | 183 |
| [ Was auch immer im Studium passiert, ich werde schon klarkommen.]                                                      | 3,36       | ,654               | 183 |
| [ Durch meine vergangenen Erfahrungen im Studium bin ich gut auf meine berufliche Zukunft vorbereitet.]                 | 2,70       | ,852               | 183 |
| [ Ich erreiche die Ziele im Studium, die ich mir setze. ]                                                               | 3,28       | ,643               | 183 |
| [ Ich fühle mich den meisten Anforderungen im Studium gewachsen. ]                                                      | 3,33       | ,614               | 183 |

**Item-Skala-Statistiken**

|                                                                                                                         | Skalenmittelwert, wenn Item weggelassen | Skalenvarianz, wenn Item weggelassen | Korrigierte Item-Skala-Korrelation | Cronbachs Alpha, wenn Item weggelassen |
|-------------------------------------------------------------------------------------------------------------------------|-----------------------------------------|--------------------------------------|------------------------------------|----------------------------------------|
| [ Wenn im Studium unerwartete Situationen auftauchen, weiß ich immer, wie ich mich verhalten soll. ]                    | 21,69                                   | 10,743                               | ,586                               | ,807                                   |
| [ Für jedes Problem im Studium habe ich eine Lösung. ]                                                                  | 21,47                                   | 10,470                               | ,629                               | ,801                                   |
| [ Schwierigkeiten im Studium sehe ich gelassen entgegen, weil ich mich immer auf meine Fähigkeiten verlassen kann. ]    | 21,38                                   | 9,928                                | ,673                               | ,794                                   |
| [ Wenn ich im Studium mit einem Problem konfrontiert werde, habe ich meist mehrere Ideen, wie ich damit fertig werde. ] | 21,37                                   | 11,246                               | ,455                               | ,823                                   |
| [ Was auch immer im Studium passiert, ich werde schon klarkommen.]                                                      | 21,05                                   | 10,535                               | ,614                               | ,803                                   |
| [ Durch meine vergangenen Erfahrungen im Studium bin ich gut auf meine berufliche Zukunft vorbereitet.]                 | 21,70                                   | 10,770                               | ,372                               | ,843                                   |
| [ Ich erreiche die Ziele im Studium, die ich mir setze. ]                                                               | 21,13                                   | 10,957                               | ,518                               | ,815                                   |
| [ Ich fühle mich den meisten Anforderungen im Studium gewachsen. ]                                                      | 21,08                                   | 10,500                               | ,677                               | ,796                                   |

**Skala-Statistiken**

| Mittelwert | Varianz | Standardabweichung | Anzahl der Items |
|------------|---------|--------------------|------------------|
| 24,41      | 13,573  | 3,684              | 8                |

\*\*\*\*\*SWSRL\*\*\*\*\*

\*Skalenbildung SWSRL\*

COMPUTE SWSRL=MEAN(SWSRL\_1, SWSRL\_2, SWSRL\_3, SWSRL\_4, SWSRL\_5, SWSRL\_6, SWSRL\_7, SWSRL\_8, SWSRL\_9, SWSRL\_10, SWSRL\_11).

EXECUTE.



\*Reliabilität SWSRL\*

RELIABILITY

```

/VARIABLES=SWSRL_1 SWSRL_2 SWSRL_3 SWSRL_4 SWSRL_5 SWSRL_6 SWSRL_7 SWSRL_8 SWSRL_9 SWSRL_10 SWSRL_11
/SCALE('SWSRL') ALL
/MODEL=ALPHA
/STATISTICS=DESCRIPTIVE SCALE
/SUMMARY=TOTAL.

```

## Reliabilität

### Skala: SWSRL

#### Zusammenfassung der Fallverarbeitung

|       |                             | N   | %     |
|-------|-----------------------------|-----|-------|
| Fälle | Gültig                      | 185 | 98,4  |
|       | Ausgeschlossen <sup>a</sup> | 3   | 1,6   |
|       | Gesamt                      | 188 | 100,0 |

a. Listenweise Löschung auf der Grundlage aller Variablen in der Prozedur.

#### Reliabilitätsstatistiken

| Cronbachs Alpha | Anzahl der Items |
|-----------------|------------------|
| ,770            | 11               |

#### Itemstatistiken

|                                                                                                                       | Mittelwert | Standardabweichung | N   |
|-----------------------------------------------------------------------------------------------------------------------|------------|--------------------|-----|
| [ Wie gut können Sie, Aufgaben bis zu einem Abgabetermin fertig stellen? ]                                            | 3,30       | ,770               | 185 |
| [ Wie gut können Sie lernen, wenn es interessantere Dinge zu tun gibt? ]                                              | 2,58       | ,912               | 185 |
| [ Wie gut können Sie sich auf Lernthemen konzentrieren? ]                                                             | 3,03       | ,629               | 185 |
| [ Wie gut können Sie Mitschriften anfertigen? ]                                                                       | 2,92       | ,888               | 185 |
| [ Wie gut können Sie Literaturrecherche betreiben, um Informationen für eine Aufgabe zu erhalten? ]                   | 3,25       | ,703               | 185 |
| [ Wie gut können Sie Ihr Lernen planen? ]                                                                             | 2,82       | ,851               | 185 |
| [ Wie gut können Sie Ihr Lernen organisieren? ]                                                                       | 2,97       | ,744               | 185 |
| [ Wie gut können Sie sich an Informationen erinnern, die in einer Veranstaltung und im Lehrbuch präsentiert wurden? ] | 2,93       | ,715               | 185 |
| [ Wie gut können Sie sich einen Arbeitsplatz schaffen, an dem Sie ohne Ablenkung lernen können? ]                     | 3,04       | ,823               | 185 |
| [ Wie gut können Sie sich zum Lernen motivieren? ]                                                                    | 2,68       | ,781               | 185 |
| [ Wie gut können Sie sich an Diskussion in einer Veranstaltung beteiligen? ]                                          | 2,85       | ,894               | 185 |

**Item-Skala-Statistiken**

|                                                                                                                       | Skalenmittelwert, wenn Item weggelassen | Skalenvarianz, wenn Item weggelassen | Korrigierte Item-Skala-Korrelation | Cronbachs Alpha, wenn Item weggelassen |
|-----------------------------------------------------------------------------------------------------------------------|-----------------------------------------|--------------------------------------|------------------------------------|----------------------------------------|
| [ Wie gut können Sie, Aufgaben bis zu einem Abgabetermin fertig stellen? ]                                            | 29,08                                   | 20,129                               | ,367                               | ,759                                   |
| [ Wie gut können Sie lernen, wenn es interessantere Dinge zu tun gibt? ]                                              | 29,80                                   | 20,552                               | ,227                               | ,779                                   |
| [ Wie gut können Sie sich auf Lernthemen konzentrieren? ]                                                             | 29,36                                   | 19,600                               | ,586                               | ,738                                   |
| [ Wie gut können Sie Mitschriften anfertigen? ]                                                                       | 29,46                                   | 19,565                               | ,370                               | ,760                                   |
| [ Wie gut können Sie Literaturrecherche betreiben, um Informationen für eine Aufgabe zu erhalten? ]                   | 29,13                                   | 20,744                               | ,315                               | ,764                                   |
| [ Wie gut können Sie Ihr Lernen planen? ]                                                                             | 29,56                                   | 18,421                               | ,564                               | ,734                                   |
| [ Wie gut können Sie Ihr Lernen organisieren? ]                                                                       | 29,42                                   | 18,288                               | ,695                               | ,721                                   |
| [ Wie gut können Sie sich an Informationen erinnern, die in einer Veranstaltung und im Lehrbuch präsentiert wurden? ] | 29,45                                   | 20,456                               | ,354                               | ,760                                   |
| [ Wie gut können Sie sich einen Arbeitsplatz schaffen, an dem Sie ohne Ablenkung lernen können? ]                     | 29,35                                   | 19,923                               | ,362                               | ,760                                   |
| [ Wie gut können Sie sich zum Lernen motivieren? ]                                                                    | 29,70                                   | 18,830                               | ,564                               | ,735                                   |
| [ Wie gut können Sie sich an Diskussion in einer Veranstaltung beteiligen? ]                                          | 29,53                                   | 19,805                               | ,334                               | ,764                                   |

**Skala-Statistiken**

| Mittelwert | Varianz | Standardabweichung | Anzahl der Items |
|------------|---------|--------------------|------------------|
| 32,38      | 23,260  | 4,823              | 11               |

```
T-TEST GROUPS=Studienform1(1 2)
/MISSING=ANALYSIS
/VARIABLES=sex Alter SWSRS_22 SWSRS_PRÄ_22 SWSRS_AKT_22 SWSRS_POST_22 ASW SW_S REG SWSRL
/CRITERIA=CI(.95).
```

**T-Test**

**Gruppenstatistiken**

|               | Studienform1 | N   | Mittelwert | Standardabweichung | Standardfehler des Mittelwertes |
|---------------|--------------|-----|------------|--------------------|---------------------------------|
| Geschlecht    | Promotion    | 48  | 1,17       | ,377               | ,054                            |
|               | andere       | 140 | 1,39       | ,489               | ,041                            |
| Alter         | Promotion    | 48  | 33,0625    | 12,93915           | 1,86761                         |
|               | andere       | 140 | 27,2286    | 5,16399            | ,43644                          |
| SWSRS_22      | Promotion    | 48  | 8,0294     | 1,34420            | ,19402                          |
|               | andere       | 140 | 7,8909     | 1,57660            | ,13325                          |
| SWSRS_PRÄ_22  | Promotion    | 48  | 8,0000     | 1,50256            | ,21688                          |
|               | andere       | 140 | 7,6750     | 1,72839            | ,14608                          |
| SWSRS_AKT_22  | Promotion    | 48  | 7,8750     | 1,53338            | ,22132                          |
|               | andere       | 140 | 7,8159     | 1,75721            | ,14851                          |
| SWSRS_POST_22 | Promotion    | 48  | 8,2530     | 1,44316            | ,20830                          |
|               | andere       | 140 | 8,1724     | 1,61265            | ,13629                          |
| ASW           | Promotion    | 46  | 3,0587     | ,46216             | ,06814                          |
|               | andere       | 129 | 2,9845     | ,38719             | ,03409                          |
| SW_S          | Promotion    | 47  | 3,1410     | ,49221             | ,07180                          |
|               | andere       | 136 | 3,0202     | ,44675             | ,03831                          |
| REG           | Promotion    | 47  | 2,8511     | ,39446             | ,05754                          |
|               | andere       | 129 | 2,7907     | ,44764             | ,03941                          |
| SWSRL         | Promotion    | 48  | 3,0833     | ,43003             | ,06207                          |
|               | andere       | 138 | 2,8983     | ,43236             | ,03681                          |

**Test bei unabhängigen Stichproben**

|               |                             | Levene-Test der Varianzgleichheit |             | T-Test für die Mittelwertgleichheit |         |                 |                    |                              |                                      |         |
|---------------|-----------------------------|-----------------------------------|-------------|-------------------------------------|---------|-----------------|--------------------|------------------------------|--------------------------------------|---------|
|               |                             | F                                 | Signifikanz | T                                   | df      | Sig. (2-seitig) | Mittlere Differenz | Standardfehler der Differenz | 95% Konfidenzintervall der Differenz |         |
|               |                             |                                   |             |                                     |         |                 |                    |                              | Untere                               | Obere   |
| Geschlecht    | Varianzen sind gleich       | 54,444                            | ,000        | -2,830                              | 186     | ,005            | -,219              | ,077                         | -,372                                | -,066   |
|               | Varianzen sind nicht gleich |                                   |             | -3,209                              | 105,043 | ,002            | -,219              | ,068                         | -,354                                | -,084   |
| Alter         | Varianzen sind gleich       | 5,975                             | ,015        | 4,421                               | 186     | ,000            | 5,83393            | 1,31949                      | 3,23083                              | 8,43703 |
|               | Varianzen sind nicht gleich |                                   |             | 3,042                               | 52,221  | ,004            | 5,83393            | 1,91792                      | 1,98572                              | 9,68213 |
| SWSRS_22      | Varianzen sind gleich       | ,587                              | ,445        | ,544                                | 186     | ,587            | ,13845             | ,25444                       | -,36352                              | ,64041  |
|               | Varianzen sind nicht gleich |                                   |             | ,588                                | 94,670  | ,558            | ,13845             | ,23537                       | -,32884                              | ,60573  |
| SWSRS_PRÄ_22  | Varianzen sind gleich       | ,546                              | ,461        | 1,161                               | 186     | ,247            | ,32500             | ,28003                       | -,22744                              | ,87744  |
|               | Varianzen sind nicht gleich |                                   |             | 1,243                               | 92,856  | ,217            | ,32500             | ,26148                       | -,19426                              | ,84426  |
| SWSRS_AKT_22  | Varianzen sind gleich       | ,693                              | ,406        | ,208                                | 186     | ,836            | ,05913             | ,28492                       | -,50296                              | ,62121  |
|               | Varianzen sind nicht gleich |                                   |             | ,222                                | 92,511  | ,825            | ,05913             | ,26653                       | -,47019                              | ,58845  |
| SWSRS_POST_22 | Varianzen sind gleich       | ,166                              | ,684        | ,306                                | 186     | ,760            | ,08053             | ,26286                       | -,43804                              | ,59909  |
|               | Varianzen sind nicht gleich |                                   |             | ,323                                | 90,264  | ,747            | ,08053             | ,24893                       | -,41399                              | ,57505  |
| ASW           | Varianzen sind gleich       | ,527                              | ,469        | 1,059                               | 173     | ,291            | ,07420             | ,07007                       | -,06410                              | ,21250  |
|               | Varianzen sind nicht gleich |                                   |             | ,974                                | 68,829  | ,334            | ,07420             | ,07619                       | -,07781                              | ,22621  |
| SW_S          | Varianzen sind gleich       | ,496                              | ,482        | 1,556                               | 181     | ,122            | ,12074             | ,07762                       | -,03242                              | ,27389  |
|               | Varianzen sind nicht gleich |                                   |             | 1,484                               | 73,881  | ,142            | ,12074             | ,08138                       | -,04141                              | ,28289  |
| REG           | Varianzen sind gleich       | ,407                              | ,524        | ,816                                | 174     | ,416            | ,06037             | ,07398                       | -,08565                              | ,20638  |
|               | Varianzen sind nicht gleich |                                   |             | ,866                                | 92,014  | ,389            | ,06037             | ,06974                       | -,07815                              | ,19888  |
| SWSRL         | Varianzen sind gleich       | ,377                              | ,540        | 2,557                               | 184     | ,011            | ,18500             | ,07235                       | ,04226                               | ,32775  |
|               | Varianzen sind nicht gleich |                                   |             | 2,564                               | 82,368  | ,012            | ,18500             | ,07216                       | ,04146                               | ,32854  |

**CORRELATIONS**

```

/VARIABLES=SWSRS_22 SWSRS_PRÄ_22 SWSRS_AKT_22 SWSRS_POST_22 ASW SW_S REG SWSRL
/PRINT=TWOTAIL NOSIG
/MISSING=PAIRWISE.

```

**Korrelationen**

Korrelationen

|               |                          | SWSRS_22 | SWSRS_PRÄ_22 | SWSRS_AKT_22 | SWSRS_POST_22 | ASW    | SW_S   | REG    | SWSRL  |
|---------------|--------------------------|----------|--------------|--------------|---------------|--------|--------|--------|--------|
| SWSRS_22      | Korrelation nach Pearson | 1        | ,892**       | ,953**       | ,898**        | ,284** | ,377** | ,631** | ,577** |
|               | Signifikanz (2-seitig)   |          | ,000         | ,000         | ,000          | ,000   | ,000   | ,000   | ,000   |
|               | N                        | 188      | 188          | 188          | 188           | 175    | 183    | 176    | 186    |
| SWSRS_PRÄ_22  | Korrelation nach Pearson | ,892**   | 1            | ,789**       | ,699**        | ,245** | ,330** | ,554** | ,541** |
|               | Signifikanz (2-seitig)   | ,000     |              | ,000         | ,000          | ,001   | ,000   | ,000   | ,000   |
|               | N                        | 188      | 188          | 188          | 188           | 175    | 183    | 176    | 186    |
| SWSRS_AKT_22  | Korrelation nach Pearson | ,953**   | ,789**       | 1            | ,785**        | ,257** | ,316** | ,639** | ,556** |
|               | Signifikanz (2-seitig)   | ,000     | ,000         |              | ,000          | ,001   | ,000   | ,000   | ,000   |
|               | N                        | 188      | 188          | 188          | 188           | 175    | 183    | 176    | 186    |
| SWSRS_POST_22 | Korrelation nach Pearson | ,898**   | ,699**       | ,785**       | 1             | ,280** | ,404** | ,519** | ,483** |
|               | Signifikanz (2-seitig)   | ,000     | ,000         | ,000         |               | ,000   | ,000   | ,000   | ,000   |
|               | N                        | 188      | 188          | 188          | 188           | 175    | 183    | 176    | 186    |
| ASW           | Korrelation nach Pearson | ,284**   | ,245**       | ,257**       | ,280**        | 1      | ,744** | ,428** | ,346** |
|               | Signifikanz (2-seitig)   | ,000     | ,001         | ,001         | ,000          |        | ,000   | ,000   | ,000   |
|               | N                        | 175      | 175          | 175          | 175           | 175    | 175    | 175    | 175    |
| SW_S          | Korrelation nach Pearson | ,377**   | ,330**       | ,316**       | ,404**        | ,744** | 1      | ,486** | ,474** |
|               | Signifikanz (2-seitig)   | ,000     | ,000         | ,000         | ,000          | ,000   |        | ,000   | ,000   |
|               | N                        | 183      | 183          | 183          | 183           | 175    | 183    | 176    | 183    |
| REG           | Korrelation nach Pearson | ,631**   | ,554**       | ,639**       | ,519**        | ,428** | ,486** | 1      | ,534** |
|               | Signifikanz (2-seitig)   | ,000     | ,000         | ,000         | ,000          | ,000   | ,000   |        | ,000   |
|               | N                        | 176      | 176          | 176          | 176           | 175    | 176    | 176    | 176    |
| SWSRL         | Korrelation nach Pearson | ,577**   | ,541**       | ,556**       | ,483**        | ,346** | ,474** | ,534** | 1      |
|               | Signifikanz (2-seitig)   | ,000     | ,000         | ,000         | ,000          | ,000   | ,000   | ,000   |        |
|               | N                        | 186      | 186          | 186          | 186           | 175    | 183    | 176    | 186    |

\*\* . Die Korrelation ist auf dem Niveau von 0,01 (2-seitig) signifikant.
